# Supplementary material for: HypoFocal SRT Trial: Ultra-hypofractionated focal salvage radiotherapy for isolated prostate bed recurrence after radical prostatectomy; single-arm phase II study; clinical trial protocol
Source: PubMed Central journal article supplement — BMJ Open. 2024 Jan 30;14(1):e075846. doi: 10.1136/bmjopen-2023-075846 (PMC10828884; doi:10.1136/bmjopen-2023-075846), 2024-01-30
Supplement: bmjopen-2023-075846.draft_revisions.pdf [file bmjopen-2023-075846.draft_revisions.pdf]

# BMJ Open

BMJ Open is committed to open peer review. As part of this commitment we make the peer review history of every article we publish publicly available.

When an article is published we post the peer reviewers' comments and the authors' responses online. We also post the versions of the paper that were used during peer review. These are the versions that the peer review comments apply to.

The versions of the paper that follow are the versions that were submitted during the peer review process. They are not the versions of record or the final published versions. They should not be cited or distributed as the published version of this manuscript.

BMJ Open is an open access journal and the full, final, typeset and author-corrected version of record of the manuscript is available on our site with no access controls, subscription charges or pay-per-view fees (<http://bmjopen.bmj.com>).

If you have any questions on BMJ Open's open peer review process please email [info.bmjopen@bmj.com](mailto:info.bmjopen@bmj.com)

# BMJ Open

## HypoFocal SRT Trial: Ultra-hypo fractionated focal salvage radiotherapy for isolated prostate bed recurrence after radical prostatectomy - Single-arm phase II trial.

|                               |                                                                                                                                                                                                                                                                                                                                                                                                                                                                                                                                                                                                                                                                                                                                                                                                                                                                                                                   |
|-------------------------------|-------------------------------------------------------------------------------------------------------------------------------------------------------------------------------------------------------------------------------------------------------------------------------------------------------------------------------------------------------------------------------------------------------------------------------------------------------------------------------------------------------------------------------------------------------------------------------------------------------------------------------------------------------------------------------------------------------------------------------------------------------------------------------------------------------------------------------------------------------------------------------------------------------------------|
| Journal:                      | <i>BMJ Open</i>                                                                                                                                                                                                                                                                                                                                                                                                                                                                                                                                                                                                                                                                                                                                                                                                                                                                                                   |
| Manuscript ID                 | bmjopen-2023-075846                                                                                                                                                                                                                                                                                                                                                                                                                                                                                                                                                                                                                                                                                                                                                                                                                                                                                               |
| Article Type:                 | Protocol                                                                                                                                                                                                                                                                                                                                                                                                                                                                                                                                                                                                                                                                                                                                                                                                                                                                                                          |
| Date Submitted by the Author: | 20-May-2023                                                                                                                                                                                                                                                                                                                                                                                                                                                                                                                                                                                                                                                                                                                                                                                                                                                                                                       |
| Complete List of Authors:     | Mathier, Etienne; Inselspital University Hospital Bern, Department of Radiation Oncology<br>Althaus, Alexander; Inselspital University Hospital Bern, Department of Radiation Oncology<br>Zwahlen, Daniel; Kantonsspital Winterthur, Department of Radiation Oncology<br>Lustenberger, Jens; University Hospital Basel, Department of Radiation Oncology<br>Zamboglou, Constantinos; German Oncology Center, European University Cyprus, Limassol, Cyprus<br>De Bari, Berardino; Réseau hospitalier neuchâtelois, Department of Radiation Oncology<br>Aebersold, Daniel M.; Inselspital University Hospital Bern, Department of Radiation Oncology<br>Zilli, Thomas; Oncological Institute of Southern Switzerland, EOC, Bellinzona, Switzerland, Department of Radiation Oncology; Università della Svizzera italiana<br>Shelan, Mohamed; Inselspital University Hospital Bern, Department of Radiation Oncology |
| Keywords:                     | Radiation oncology < RADIOTHERAPY, Prostatic Neoplasms, Urological tumours < ONCOLOGY                                                                                                                                                                                                                                                                                                                                                                                                                                                                                                                                                                                                                                                                                                                                                                                                                             |
|                               |                                                                                                                                                                                                                                                                                                                                                                                                                                                                                                                                                                                                                                                                                                                                                                                                                                                                                                                   |

SCHOLARONE™  
Manuscripts

1  
2  
3  
4 1 **HypoFocal SRT Trial: Ultra-hypo fractionated focal salvage radiotherapy**  
5  
6 2 **for isolated prostate bed recurrence after radical prostatectomy -**  
7  
8 3 **Single-arm phase II trial.**  
9

10  
11 4 Etienne Mathier<sup>1#</sup>, Alexander Althaus<sup>1#</sup>, Daniel R. Zwahlen<sup>2</sup>, Jens Lustenberger<sup>3</sup>, Constantinos  
12 5 Zamboglou<sup>4</sup>, Berardino De Bari<sup>5</sup>, Daniel M. Aebersold<sup>1</sup>, Thomas Zilli<sup>6\*</sup>, Mohamed Shelan<sup>1\*</sup>  
13

14  
15 6 #Equal contribution as first authors  
16

17  
18 7 \*Equal contribution as last authors  
19

20  
21 8 Affiliations  
22

23 9 <sup>1</sup>Department of Radiation Oncology, Bern University Hospital and University of Bern, Inselspital,  
24  
25 10 Freiburgstrasse 18, 3010 Bern  
26

27  
28 11 <sup>2</sup>Department of Radiation Oncology, Kantonsspital Winterthur, Winterthur, Switzerland  
29

30  
31 12 <sup>3</sup>Department of Radiation Oncology, University Hospital of Basel, Basel, Switzerland  
32

33  
34 13 <sup>4</sup>German Oncology Center, European University Cyprus, Limassol, Cyprus  
35

36  
37 14 <sup>5</sup>Department of Radiation Oncology, Réseau hospitalier neuchâtelois, La Chaux-de-Fonds, Switzerland  
38

39  
40 15 <sup>6</sup>Department of Radiation Oncology, Oncological Institute of Southern Switzerland, EOC, Bellinzona,  
41 16 Switzerland; Università della Svizzera Italiana, Lugano, Switzerland  
42

43  
44 17 \* Correspondence:  
45

46  
47 18 Mohamed Shelan, MD  
48

49  
50 19 Department of Radiation Oncology, Inselspital, Bern University Hospital, University of Bern, 3010 Bern,  
51  
52 20 Switzerland  
53

54  
55 21 Tel: +41 31 632 26 32  
56

57  
58 22 Email: [mohamed.shelan@insel.ch](mailto:mohamed.shelan@insel.ch)  
59  
60

## 24 ABSTRACT

25 **Background:** Despite radical prostatectomy (RP) and radiotherapy (RT) being established treatments for  
26 localized prostate cancer, a significant number of patients experience recurrent disease. While  
27 conventionally fractionated RT is still being used as a standard treatment in the postoperative setting, ultra-  
28 hypofractionated RT has emerged as a viable option with encouraging results in patients with localized  
29 disease in the primary setting. In addition, recent technological advancements in RT delivery and precise  
30 definition of isolated macroscopic recurrence within the prostate bed using Prostate-Specific Membrane  
31 Antigen-Positron Emission Tomography (PSMA-PET) and multiparametric magnetic resonance imaging  
32 (mpMRI) allow the exploration of ultra-hypofractionated schedules in the salvage setting using five  
33 fractions.

34 **Methods:** In this single-arm prospective phase II multicenter trial, 36 patients with node-negative prostate  
35 adenocarcinoma treated with radical prostatectomy (RP) at least 6 months before trial registration, tumor  
36 stage pT2a-3b, R0-1, pN0, or cN0 according to the UICC TNM 2009 and evidence of measurable local  
37 recurrence within the prostate bed detected by PSMA PET/CT and mpMRI within the last 3 months, will  
38 be included. The patients will undergo focal ultra-hypofractionated salvage RT (sRT) with 34 Gy in 5  
39 fractions every other day to the site of local recurrence in combination with 6 months of Androgen  
40 deprivation therapy. The primary outcome of this study is biochemical relapse-free survival at 2 years.  
41 Secondary outcomes include acute side effects (until 90 days after the end of RT) of grade 3 or higher based  
42 on Common Terminology Criteria for Adverse Events (CTCAE version 5), progression-free survival,  
43 metastasis-free survival, late side effects, and the quality of life (based on EORTC QLQ-C30, QLQ-PR25).

44 **Discussion:** We propose that focal ultra-hypofractionated sRT is a valid treatment concept to conventional  
45 sRT because of its possible advantageous therapeutic ratio combined with the reduced number of fractions  
46 and the precisely defined target volume sparing the adjacent organs at risk.

47 **Trial registration:** ClinicalTrials.gov NCT05746806. Registered on February 28, 2023. Cantonal Ethics  
48 Committee Number: KEK-BE 2022-01026.

### 49 **Strengths of this study:**

50 First prospective clinical trial investigating the efficacy and safety of ultra-hypofractionated Salvage  
51 radiotherapy to isolated local recurrence within the prostate bed after radical prostatectomy.

52 Both mpMRI and PSMA PET/CT are used to precisely identify the site local recurrence and radiotherapy  
53 planning.

1  
2  
3  
4  
5  
6  
7  
8  
9  
10  
11  
12  
13  
14  
15  
16  
17  
18  
19  
20  
21  
22  
23  
24  
25  
26  
27  
28  
29  
30  
31  
32  
33  
34  
35  
36  
37  
38  
39  
40  
41  
42  
43  
44  
45  
46  
47  
48  
49  
50  
51  
52  
53  
54  
55  
56  
57  
58  
59  
60

**54 Limitations of this study:**

55 Not a randomized controlled trial, and the results will be regenerated in a larger clinical trial.

56 **Study status:** Open for accrual.

57 **Funding:** Debiopharm AG and Berger-Janser Stiftung

58 **Keywords:** ultra-hypofractionated salvage radiotherapy; SRT; local recurrence; prostatic cancer.

59

For peer review only

## 60 1 Background

61 Radical prostatectomy (RP) and radiotherapy (RT) are cornerstones for the treatment of localized prostate  
62 cancer (PC) [1]. However, around 30% to 60% of patients undergoing RP will develop recurrent disease  
63 [2, 3]. Various large randomized controlled studies have shown the effectiveness of postoperative RT in  
64 men who have a high risk of local recurrence following RP, such as pT3 tumor or positive resection margins  
65 [4–8]. In the era of high-sensitivity prostate-specific antigen (PSA) and prostate-specific membrane  
66 antigen-positron emission tomography and computed tomography (PSMA-PET/CT) as a standard staging  
67 examination in recurrent PC, new data suggest a comparable oncological results if patients are treated early  
68 with salvage RT (sRT) compared to immediate adjuvant RT [9–12]. Nevertheless, the aforementioned trials  
69 and those involving patients receiving sRT due to macroscopic tumor recurrence in the prostate bed were  
70 conducted with conventionally fractionated RT, typically 2 Gy per fraction [4–12].

71 Recently, ultra-hypofractionated RT has been utilized as a valid therapeutic option in patients with low- or  
72 intermediate-risk as a definitive treatment. Published data with fair follow-up periods demonstrating  
73 excellent biochemical control management with a favorable toxicity profile [13–20]. Moreover, the  
74 evidence on ultra-hypofractionated in high-risk individuals is emerging, and many significant studies have  
75 reported favorable findings [21–26]. Ultra-hypofractionation is used to treat patients with PC due to its low  
76  $\alpha/\beta$  value which is thought to be around 1.5 Gy [27, 28]. It is anticipated that increasing the dose per fraction  
77 would increase the therapeutic ratio and, thus, the potential tumor control. Nevertheless, considering the  
78 low toxicity rates reported [29–37], using moderate hypofractionation in the postoperative setting with a  
79 daily RT dose of up to 3 Gy per fraction does not seem to corroborate this concern. However, the evidence  
80 on postoperative ultra-hypofractionated RT to the prostate bed is still in its early stages.

81 Further improvement in the oncological outcomes can be expected through technological developments in  
82 RT delivery and precise targeting of the local relapses in the prostate bed. A sRT using an ultra-  
83 hypofractionated schedule delivered in 5 fractions and limited only to the site of isolated macroscopic  
84 recurrence in the prostate bed as defined by PSMA-PET and multiparametric magnetic resonance imaging  
85 (mpMRI) in combination with short-term androgen deprivation therapy for 6 months, may represent a valid  
86 treatment strategy to improve the therapeutic ratio in these patients (shorter overall treatment time, better  
87 sparing of organs at risk while delivering higher biological-equivalent dose into the target volume).

88 The main objective of this prospective single-arm trial is to explore the efficacy and safety of ultra-  
89 hypofractionated sRT delivered in 5 fractions to the site of local recurrence within the prostate bed after  
90 RP, where mpMRI and PSMA PET/CT are used to precisely identify the local recurrence.

## 91 2 METHODS

92 The Hypo Focal sRT Trial protocol was constructed using the SPIRIT reporting guidelines [29].

### 93 2.1 Regulatory Approval

94 Following permission from the regional ethics committees (KEK-BE 2022-01026), the research is  
95 registered with ClinicalTrials.gov (NCT05746806) and the Swiss National Clinical Trials Portal. Both the  
96 sponsor-investigator and the trial statistician have given their approval to the protocol version 3.0 (dated  
97 11.11.2022), and they hereby confirm that they will conduct the study in accordance with the protocol, the  
98 most recent version of the World Medical Association Declaration of Helsinki, the ICH-GCP guidelines,  
99 and the requirements that are legally applicable in their respective jurisdictions.

### 100 2.2 Study Population

#### 101 - Inclusion criteria:

- 102 1. Before registration and before any trial-specific procedures, written informed consent in  
103 accordance with ICH/GCP rules is required.
- 104 2. Minimum age to register is eighteen years old.
- 105 3. Performance level 0-1 according to WHO.
- 106 4. Lymph node negative adenocarcinoma of the prostate treated with RP at least 6 months before  
107 trial registration. Tumor stage pT2a-3b, R0-1, pN0 or cN0 according to the UICC TNM 2009.
- 108 5. Evidence of measurable local recurrence at the prostate bed detected by PSMA PET/CT and  
109 mpMRI within the last 3 months. In case of unclear local recurrence, biopsy confirmation is  
110 recommended.
- 111 6. Patient must have non-metastatic (N0, M0) disease, as defined by a lack of nodal or distant  
112 metastases seen on PSMA PET/CT scan.
- 113 7. Patients are required to have non-castrate levels of serum testosterone (more than or equal to  
114 50 ng/dL).  
115  
116
- 117 8. Patients must not have had bilateral orchiectomy, LHRH agonists, antiandrogens, or any  
118 combination of these in the past.

1  
2  
3 119  
4  
5 120 9. Absence of any psychological, family, sociological, or geographic situation that would make  
6 121 it difficult for the patient to adhere to the research protocol and follow-up plan; the patient should  
7  
8 122 be informed of these factors before registering for the trial.  
9  
10 123

11  
12 124 **- Exclusion criteria:**

- 13 125 1. PSA levels ( $> 0.4$  ng/mL) that persist 4–20 weeks after RP.  
14  
15 126 2. Previous diagnosis of hematologic or primary solid malignancy during the preceding three  
16 127 years previous to registration, except for curatively managed localized non-melanoma skin  
17 128 cancer.  
18  
19 129 3. Use of substances known to alter PSA levels, such as androgen deprivation therapy and any  
20 130 kind of androgen suppression medication, within four weeks of the commencement of the trial  
21 131 treatment phase.  
22  
23 132 4. Bilateral hip prosthesis.  
24  
25 133 5. Co-morbidities that are severe or active and that are likely to have an effect on whether or not  
26 134 sRT is advisable.  
27  
28 135 6. Treatment with any experimental treatment or involvement in a clinical trial within the last  
29 136 thirty days (with the exception of concurrent participation in the biobank research, which is  
30 137 permitted) is required for eligibility to register.  
31  
32  
33  
34

35 138 **2.3 Patient and public involvement**

36  
37 139 There was no patient or public participation in the research design, methodology, conduction, or reporting  
38 140 of this trial.  
39  
40

41 141 **2.4 Recruitment and screening**

42  
43 142 Authorized investigators are the only ones who will be able to register patients for the study. The following  
44 143 tasks need to be completed before registering for the study:

- 45  
46  
47 144 - Fill in the patient screening (used for monitoring potentially eligible patients and will be  
48 145 destroyed after the end of the accrual period. Screening list is not a part of the CRFs),  
49 146 enrolment and identification lists.  
50  
51 147 - Check the eligibility criteria.  
52  
53 148 - Obtain signed and dated written informed permission from the patient before performing  
54 149 any protocol-specific procedure in accordance with ICH/GCP and local regulations.  
55  
56  
57  
58  
59  
60



1  
2  
3 150 - Patients must complete the pre-treatment of quality-of-life assessment per protocol.  
4  
5 151  
6

7 152 Only electronic case report forms (eCRF) will be used. The use of worksheets is allowed if the copies of  
8 153 the templates are documented in the trial master file (TMF). The used worksheets must be kept with the  
9 154 patient charts. Registration is done via the Internet 'https://secutrial.insel.ch'. SecuTrial (interactive  
10 155 Systems) will be used as a database. In case of problems, investigators can phone the study coordinator  
11 156 from Monday through Friday. It is advised that investigators get in touch with CTU Bern's data management  
12 157 if they have any technical issues. Sites must deliver a copy of the finished personnel list to the Sponsor in  
13 158 order to acquire permission for online registration/data input. The online database's login information will  
14 159 be supplied to approved users.  
15  
16  
17  
18  
19  
20  
21 160  
22

## 23 161 **2.5 Study design and sample size**

24  
25 162 This is a single-arm, prospective, phase II multicenter study. According to the published prospective trials  
26 163 and retrospective series reporting the outcome of the normo-fractionated sRT, we define biochemical  
27 164 relapse-free survival at 2 years of 60% as poor and of 80% as the promising outcome that would justify  
28 165 further investigation [30–33]. We will therefore test the null hypothesis that the biochemical relapse-free  
29 166 survival at 2 years is lower than 60% against the alternative that it is at least 80%. Based on a one-sample  
30 167 binomial exact test with a one-sided alpha of 5%, 36 patients are required to reach a power of 80%, not  
31 168 taking into account patients lost to follow-up. The null hypothesis will be rejected if at least 27 patients  
32 169 show biochemical relapse-free survival at 2 years. We will control the safety of the intervention during the  
33 170 trial by assessing acute side effects (grade 3 or higher) at 90 days after 12 and 24 patients. The trial will be  
34 171 stopped if there is evidence that the proportion of patients with acute side effects (grade 3 or higher) is  
35 172 larger than 27%; the proportion observed would be tested using one-sample binomial exact tests with a one-  
36 173 sided alpha of 5%. **Figure 1** shows a summary of the study design and schedule.  
37  
38  
39  
40  
41  
42  
43  
44

45 174  
46  
47

48 175  
49

50 176  
51

52 177  
53

54 178  
55  
56  
57  
58  
59  
60

## 179 2.6 Outcomes

### 180 - Primary outcome

- 181 - Biochemical relapse-free survival at 2 years.

### 182 - Secondary outcome

- 183 - Acute side effects (until 90 days after the end of RT) of grade 3 or higher based on CTCAE v5
- 184 - Progression-free survival
- 185 - Metastasis-free survival
- 186 - Late side effects
- 187 - Quality of life (based on EORTC QLQ-C30, QLQ-PR25)

## 188 2.7 Study Intervention

### 189 2.6.1. Pre-registration imaging

190 Within 3 months prior to registration, either PSMA PET/CT is mandatory to exclude regional or distant  
191 metastasis. Both <sup>18</sup>F- and <sup>68</sup>Ga-PSMA tracers are allowed. A mpMRI of the prostate bed acquired within  
192 3 months before registration is mandatory to define the extension of local recurrence.

### 194 2.6.2. Radiation treatment (SBRT)

#### 195 2.6.2.1. Patient's positioning, immobilization, data acquisition and simulation:

196 Determining the gross tumor volume (GTV), the planned target volume (PTV), and the essential  
197 structures requires a treatment-planning CT scan with the patient in the same position as during  
198 treatment. The patients will be placed in the supine position for the entire process. Support for the knees  
199 and legs is strongly advised. On a flat table, each patient will be placed in the treatment position while  
200 being immobilized by a unique device. It is advised that patients be treated and scanned while having  
201 a comfortably full bladder. For prostate bed RT, it is advised to have an empty rectum. An example of  
202 a bladder and rectal protocol: An empty rectum is provided by using a rectal enema ± 60 minutes before  
203 planning CT. After emptying the rectum and bladder, the patient is asked to drink the amount of 500-  
204 750 ml of water. The planning CT is then performed after ca. 40 minutes. The patient repeats the bladder  
205 filling procedure during the entire treatment course. An endorectal balloon can be used for repositioning  
206 purposes as per local institutional standards.

207 Radiopaque fiducial markers (mandatory for robotic-based treatments) may be implanted in the prostate  
208 bed one week before the planning CT scan at the discretion of the treating center. During the planning  
209 and performance of the treatment, the patient's location will be reproduced employing skin markings

210 and orthogonal laser beams. The pelvis should be scanned during the treatment planning CT scan, at  
211 least from the lower portion of the second lumbar vertebra (L2) to the lower half of the ischial  
212 tuberosities. The CT scan must cover the full target volume and all organs at risk (OAR). A CT slice  
213 should be no thicker than 2 mm. On every CT slice that shows the GTV, PTV, and OAR, these  
214 structures must be highlighted. Morphological and topographical information given by clinical  
215 examination, mpMRI and PET/CT must be integrated to delineate the target volumes. Rigid or  
216 deformable co-registration is allowed.

217

#### 218 2.6.2.2. Volumes:

##### 219 2.6.2.2.1 Definition of target volumes (refer to Appendix 2 & 3):

- 220 • **The Gross Tumor Volume of the suspicious local recurrence (GTV)** is defined by the  
221 physician as all known gross disease *before any treatment* as defined by the CT/MRI images  
222 and PET scan using rigid or deformable fusion and/or clinical information.
- 223 • **The Planning Target Volume (PTV)** will provide the GTV a margin to account for daily  
224 treatment setup variations and internal motion brought on by breathing or movement during  
225 treatment. The PTV should surround the GTV with a 5 mm margin on all sides.

226

227

##### 228 2.6.2.2.1 Organs at risk (OAR):

229 The delineation of the **OAR** should be done following the RTOG guidelines; the normal pelvis atlas on the  
230 RTOG/NRG Oncology website provides examples of normal tissue contours [34].

231 **The bladder** is defined by its external wall, with a thickness of 5 mm delineated on each slide, from the  
232 dome to the bladder neck and the start of the vesicourethral anastomosis (VUA).

233 **The VUA and distal urethra** are delineated from the bladder neck to the distal urethra using mpMRI  
234 sequences, and a 2-mm isotropic margin is added around these structures to create a planning organ at risk  
235 volume (PRV).

236 **The rectum** is defined by its external wall, with a thickness of 5 mm from the recto-sigmoid junction to  
237 ischial tuberosities.

238 **The femoral heads** are delineated from the top of the hip joint to the small trochanter, while the bowel  
 239 bag is delineated from the most inferior small or large bowel loop to 1 cm above the planning target volume  
 240 (PTV) for coplanar beam plans, or more if non-coplanar beams or tomotherapy plans are used.

241 It is suggested that dose constraints be adhered to; however, if this is not practicable, the dose per fraction  
 242 or target coverage may be adjusted to comply with the constraint. **Table 1** shows the dose constraints for  
 243 OARs.

244

245 **Table 1: Dose constraints for OARs.**

| Organ at risk              | Dose Constraint | Aim     |
|----------------------------|-----------------|---------|
| Rectal Wall                | V18.1 Gy        | < 50%   |
|                            | V29 Gy          | < 20%   |
|                            | V36 Gy          | < 1 cc  |
| Bladder Wall               | V18.1 Gy        | < 40%   |
|                            | V 37 Gy         | < 10 cc |
| PRV_VUA and distal Urethra | V36 Gy          | < 1 cc  |
| Femoral heads              | V14.5 Gy        | < 5%    |
| Penile bulb                | V29.5 Gy        | < 50%   |
| Bowel                      | V18.1 Gy        | < 5 cc  |
|                            | V30 Gy          | < 1 cc  |

246

247 **2.6.2.2.3 Treatment techniques**

248 It is required to apply rotating techniques or intensity-modulated RT (IMRT). Only dosimetry  
 249 produced by inversed treatment planning is, by definition, regarded as IMRT. Step-and-Shoot,  
 250 Sliding-Window, and Volumetric Modulated Arc therapy (VMAT), as well as MRI-guided  
 251 radiation therapies (MRIdian® or Elekta Unity®), may be employed for performing IMRT.  
 252 Treatment with Cyberknife® is allowed.

253

254 **2.6.2.2.4 Dose computation**

255 • Any treatment planning system that can compute 3D doses using a convolution strategy will be  
 256 used. Any combination of coplanar or non-coplanar fields tailored to give the required dosage  
 257 while limiting radiation to the normal tissue OAR may be used to treat the PTV. The best  
 258 conformal plan will be created in compliance with volume definitions by using 3D planning to  
 259 identify field configurations. A treatment strategy will be developed for each patient based on

260 a volumetric dose analysis, which includes DVH analyses of the PTV and crucial OAR. Each  
261 field must be treated every other day.

- 262 • PTVs should be drawn in all relevant planes. The dosage distribution should be shown at least in  
263 the plane containing the beam axes.
- 264 • The Dose Volume Histogram (DVH) produces a 3-dimensional representation of dose  
265 distribution. The dosage to the PTVs and other normal tissues at risk will be assessed using  
266 DVH.

#### 267 2.6.2.2.5 Equipment and tool

- 268 • Linear accelerator, tomotherapy and Cyberknife are allowed.

#### 269 2.6.2.2.6 Dose prescription

270 A total dose of 34 Gy (80% of the maximal dose) will be delivered in 5 fractions and fractions every second  
271 day (NTD2Gy 80 Gy  $\alpha/\beta=1.5$ Gy for tumor control and 66.6 Gy  $\alpha/\beta=3$ Gy for late toxicity). Treatment will  
272 be prescribed to the periphery of the target (80% of the dose (=34Gy), should cover 90% of the PTV)  
273 covering the PTV. A maximal dose of 40 Gy is allowed to GTV. The priority will be given with respect to  
274 dose constraints over PTV coverage.

#### 275 2.6.2.2.7 Treatment Verification

276 Daily patient setup must be done using laser alignment to reference labels on the patient's skin. Daily cone-  
277 beam CT setup and online patient position modification are required. If numerous targets are irradiated with  
278 different isocenters, a CBCT must be performed before each treatment for each isocenter. According to  
279 institutional policy, patient immobilization devices may be employed.

### 280 2.6.2. Androgen deprivation therapy

281 For a total of six months, each patient should take a three-monthly formulation of an LHRH-agonist or  
282 antagonist. Prevention with an antiandrogen is indicated for at least 5 days before the initial injection of the  
283 agonist in the case of an LHRH-agonist flare and should not be sustained for more than 15 days of the first-  
284 month duration.

- 285 • Androgen deprivation therapy (ADT) should start no later than the 1st SBRT fraction and no earlier  
286 than 2 weeks before the start of RT.
- 287 • Palliative ADT should not be initiated for biochemical progression until clinical progression has  
288 been demonstrated. In the event of symptom progression, palliative ADT is required. In the event

1  
2  
3 289 of asymptomatic clinical progression, men who are well-informed are permitted to delay ADT until  
4 290 symptomatic progression occurs (EAU 2023 guidelines) [35]. Generally, we would only begin  
5 291 ADT in asymptomatic individuals if traditional imaging confirmed clinical progression. As a result,  
6 292 we would not advocate initiating ADT for PET-positive lesions that do not seem suspicious on  
7 293 conventional imaging (CT/MRI/bone scintigraphy).

- 11 294 • ADT-related toxicity should be managed, according to Nguyen et al. [36].

12 295  
13  
14 296  
15  
16  
17  
18  
19  
20  
21  
22  
23  
24  
25  
26  
27  
28  
29  
30  
31  
32  
33  
34  
35  
36  
37  
38  
39  
40  
41  
42  
43  
44  
45  
46  
47  
48  
49  
50  
51  
52  
53  
54  
55  
56  
57  
58  
59  
60

For peer review only

297 **2.8 Study procedures**

298 The study procedures and the schedule of assessments are presented in **Table 2**.

299 **Table 2: Schedule of assessments**

| Required investigation         | Inclusion                             |                                      | Treatment | 1 Month after RT | 3 Months after RT                    | 6 Months after RT | Every 6 Months till the end of 2nd year after RT, then once per year till 60 months |
|--------------------------------|---------------------------------------|--------------------------------------|-----------|------------------|--------------------------------------|-------------------|-------------------------------------------------------------------------------------|
|                                | Within 12 weeks prior to registration | Within 2 weeks prior to registration |           |                  | Within 2 weeks prior to registration |                   |                                                                                     |
| Eligibility Check              | x                                     |                                      |           |                  |                                      |                   |                                                                                     |
| Signed informed consent        | x                                     |                                      |           |                  |                                      |                   |                                                                                     |
| Record prior history           | x                                     |                                      |           |                  |                                      |                   |                                                                                     |
| Visits                         |                                       |                                      |           |                  |                                      |                   |                                                                                     |
| Physical Examination           |                                       | x                                    |           | x                | x                                    | x                 | x                                                                                   |
| Biochemistry (Blood Samples) * |                                       |                                      |           |                  |                                      |                   |                                                                                     |
| PSA                            |                                       | x                                    |           | x                | x                                    | x                 | x                                                                                   |
| Testosterone                   |                                       | x                                    |           | x                | x                                    | x                 | x                                                                                   |
| Radiology                      |                                       |                                      |           |                  |                                      |                   |                                                                                     |
| PSMA PET                       | x                                     |                                      |           |                  |                                      |                   |                                                                                     |
| MRI                            | x                                     |                                      |           |                  |                                      |                   |                                                                                     |
| Radiotherapy                   |                                       |                                      |           |                  |                                      |                   |                                                                                     |
| Treatment planning             |                                       |                                      | x         |                  |                                      |                   |                                                                                     |
| Record Planning results        |                                       |                                      | x         |                  |                                      |                   |                                                                                     |
| Adverse Events                 |                                       |                                      |           |                  |                                      |                   |                                                                                     |
| Baseline toxicity              |                                       | x                                    |           |                  |                                      |                   |                                                                                     |
| Acute toxicity                 |                                       |                                      | x         | x                | x                                    |                   |                                                                                     |
| Late toxicity                  |                                       |                                      |           |                  |                                      | x                 | x                                                                                   |
| EORTC QoL questionnaire        |                                       |                                      |           |                  |                                      |                   |                                                                                     |
| QLQ-C30                        |                                       | x                                    |           | x                | x                                    | x                 | x                                                                                   |

1  
2  
3  
4  
5  
6  
7  
8  
9  
10  
11  
12  
13  
14  
15  
16  
17  
18  
19  
20  
21  
22  
23  
24  
25  
26  
27  
28  
29  
30  
31  
32  
33  
34  
35  
36  
37  
38  
39  
40  
41  
42  
43  
44  
45  
46  
47  
48  
49  
50  
51  
52  
53  
54  
55  
56  
57  
58  
59  
60

|          |  |   |  |   |  |   |  |   |
|----------|--|---|--|---|--|---|--|---|
| QLQ-PR25 |  | x |  | x |  | x |  | x |
|----------|--|---|--|---|--|---|--|---|

## 300 **2.9 Planned Analysis**

301 For descriptive statistics, the categorical variables will be presented as frequency and percentage, the  
302 normally distributed continuous variables will be presented as mean and standard deviation, and the  
303 non-normally distributed continuous variables will be presented as median and interquartile range.

304  
305 The time-to-event outcomes will be analyzed using Kaplan-Meier-curves, the proportion of responders  
306 at 1 and 2 years, and the restricted mean survival time at 1 and 2 years with a 95% confidence interval.  
307 Binary outcomes will be reported using absolute and relative frequencies with 95% confidence  
308 intervals.

309  
310 The probability of biochemical relapse-free survival and metastasis-free survival will be estimated  
311 using the Kaplan-Meier method. Cox proportional hazards models will be fit to assess the effects of  
312 treatment and baseline clinical and pathologic features (such as PSA, PSA doubling time, Gleason score  
313 etc.) on biochemical relapse-free survival and metastasis-free survival).

## 315 **2.10 Handling of missing data and drop-outs.**

316 All registered patients should have comprehensive baseline data. In repeated-measures analysis, all  
317 patients who have had at least one outcome evaluation may be evaluated. Based on the missing at-  
318 random technique, models will automatically adjust for missing data. We will undertake multiple  
319 imputations for patients who have no outcome data at all. Patient drop-outs will be accounted for in the  
320 time-to-event analysis via censoring.

## 323 **3 Discussion**

324 External beam RT is a well-established treatment for organ-confined prostate cancer, with comparable  
325 cure rates to radical prostatectomy [37]. Hypofractionation employs a higher dose-per-fraction while  
326 reducing the number of fractions offering a clinical benefit in terms of tumor control in tumors with a low  
327 alfa/beta ratio (e.g. prostate cancer) and favorable toxicity, allowing for higher patient comfort [38]. Based  
328 on the results of ten prior randomized trials, there is compelling evidence suggesting that  
329 moderatehypofractionation RT is not inferior to standard normofractionation RT schedules as a definitive



1  
2  
3 330 treatment for primary PC[39]. This evidence led to the integration of moderate hypofractionation schedules  
4 331 into the list of valid treatment options in the NCCN guidelines [40]. In addition, recent advancements in  
5 332 the field of RT, including IMRT/rotational techniques, image-guided RT (IGRT), and stereotactic RT  
6 333 (SBRT), have permitted the gradual integration of ultra-hypofractionation in the treatment of localized PC.  
7  
8 334 SBRT for PC has generated adequate data in terms of tumor control, patient-reported quality of life, and  
9 335 minimal toxicity [14, 16, 25] to support its introduction in clinical practice. In addition, the prostate cancer-  
10 336 working group of the German Society of Oncology (DEGRO) and the NCCN Guidelines approve the use  
11 337 of SBRT in the treatment of localized low and intermediate-risk prostate cancer and propose its use in  
12 338 clinical trials for patients with the localized high-risk disease [41, 42].

13  
14  
15  
16  
17  
18 339 The evidence of ultra-hypofractionation has recently been supported by two randomized studies (HYPO-  
19 340 RT-PC [25], PACE-B trial [14]), which compare its usage to conventional fractionation. Nevertheless, only  
20 341 HYPO-RT-PC provided information on the outcomes of long-term tumor and toxicity control. A  
21 342 randomized systematic review and meta-analysis of phase 3 studies evaluating SBRT with normo- and  
22 343 hypo-fractionated regimens were published in 2020. It was determined that the ultra-hypofractionated  
23 344 regimens had comparable 5-year disease-free survival outcomes, with late gastrointestinal and  
24 345 genitourinary toxicity of <15% and <21%, respectively, in comparison to hypofractionated regimens and  
25 346 conventional RT [43]. In 2022, the toxicity outcome of the PACE B Trial was published, showing no  
26 347 significant differences between the five fractions of SBRT and conventional RT [44].

27  
28  
29  
30  
31  
32  
33 348 The use of moderate hypofractionation is gaining more popularity as a standard treatment in the  
34 349 postoperative setting [45]. Retrospective and prospective single-arm studies support a safe toxicity profile  
35 350 and promising biochemical control rates with hypofractionation [45]. According to newly released findings  
36 351 from the phase III clinical study NRG-GU003 evaluating hypofractionated postoperative prostate bed  
37 352 RT(HYPORT) to conventional post-prostatectomy RT for men with prostate cancer, treatment with  
38 353 HYPORT did not cause a rise in patient-reported GI or genitourinary (GU) toxicity for study subjects, with  
39 354 a comparable biochemical disease control at the 2-year follow-up [46].

40  
41  
42  
43  
44  
45 355 Prakash et al. [47] did a theoretical feasibility study of SBRT following RP depending on the NTCP (Normal  
46 356 Tissue Complication Probability) model, using individuals who had been managed with conventional  
47 357 EBRT for biochemical recurrence after prostatectomy. The goal was to show that SBRT could be used  
48 358 safely and effectively in this clinical situation. A dose of 30 Gy was delivered to the PTV in five fractions,  
49 359 translating to an equivalent dose in 2 Gy fractions (EQD2) of 64.3 Gy, assuming an  $\alpha/\beta$  value of 1.5 Gy, in  
50 360 accordance with RTOG standards to define postprostatectomy volumes. To predict the probability of late  
51 361 rectal and/or bladder toxicity, the NTCP model was used. According to the NTCP model, the average

1  
2  
3 362 incidence of grade  $\geq 2$  late rectal toxicity was assessed to be 0.28%, and that of late grade 2 toxicity on the  
4 363 bladder neck was determined to be as low as 0.00013%, while the average incidence of late urinary  
5 364 symptoms exacerbation was calculated to be 4.81 %. The author's conclusion is that employing SBRT after  
6 365 surgery looks viable and may provide a safe, practical therapeutic alternative for individuals in both the  
7 366 adjuvant and salvage following biochemical failure, taking into account the limitations of the NTCP model.

11  
12 367 Sampath et al. examined the use of stereotactic dose-escalated RT on prostate beds in a prospective phase  
13 368 1 research, which revealed a crude rate of biochemical control of 42% in the overall population [48].  
14 369 Patients received care using dose fractionation regimens of 35 Gy, 40 Gy, and 45 Gy in five fractions each.  
15 370 The authors emphasized that raising the dosage to 45 Gy was possible without increasing the number of  
16 371 adverse events but that there was no observed improvement in PSA control when compared to 40 Gy in 5  
17 372 fractions. Similarly, a recent propensity score study comparing salvage SBRT and conventional RT for  
18 373 macroscopic prostate bed recurrence revealed similar bRFS and PFS rates across the two modalities. On  
19 374 the other hand, a reduced incidence of toxicity was verified for patients receiving focal stereotactic sRT  
20 375 compared to conventionally fractionated sRT, with acute GI and GU adverse events recorded in 4.4%  
21 376 against 44.4% ( $p < 0.001$ ) and 28.9% against 46.7% ( $p = 0.08$ ) of participants, and late GI and GU side  
22 377 effects reported in 0% versus 13.3% ( $p = 0.04$ ) and 6.7% versus 22.2% ( $p = 0.03$ ) of patient populations,  
23 378 respectively [49]. The authors argue that salvage SBRT is a desirable substitute for conventional sRT in  
24 379 this situation due to the approach's favorable therapeutic ratio and the less number of required fractions.  
25 380 Additionally, the prospective phase 2 SCIMITAR trial reported the quality of life and toxicity outcome of  
26 381 100 patients who received postoperative ultra-hypofractionated SBRT delivered in 5 fractions [50]. Acute  
27 382 and late grade 2 GU toxicities were both 9%, while acute and late grade 2 GI toxicities were 5% and 0%,  
28 383 respectively. Three patients had grade 3 toxicity ( $n = 1$  GU,  $n = 2$  GI) [50].

29  
30  
31  
32  
33  
34  
35  
36  
37  
38  
39  
40 384 The expected results from the Hypo-Focal sRT trial will provide the first prospective evidence for the focal  
41 385 hypofractionated RT in the salvage setting and can be used as a basis for a large multicenter phase 3 trial.  
42 386 In addition to the assumed improvement in efficacy and toxicity profile due to precise customization of the  
43 387 treatment target volumes, the application of a focal hypofractionated RT is expected to achieve cost-  
44 388 effectiveness benefits. Due to the very short treatment course (unlike conventional RT treatments, which  
45 389 can take up to 7 weeks), hypofractionated focal sRT leads to greater patient convenience and comfortability.

50 390  
51  
52  
53  
54  
55  
56  
57  
58  
59  
60

1  
2  
3 **391 Study status:**  
4

5  
6 **392** Open and currently accruing since February 20, 2023.  
7

8 **393** The approximate recruitment will be completed by March 2024.  
9

10 **394**

11  
12  
13 **395 Abbreviations:**  
14  
15

|    |          |                                                                                                        |
|----|----------|--------------------------------------------------------------------------------------------------------|
| 16 | AE       | Adverse Event                                                                                          |
| 17 | ADC      | Apparent diffusion coefficient                                                                         |
| 18 | ADT      | Androgen deprivation therapy                                                                           |
| 19 | ASR/DSUR | Annual Safety Report / Development Safety Report                                                       |
| 20 | ASTRO    | American Society for Radiation Oncology                                                                |
| 21 | ASCO/AUA | American Society of Clinical Oncology/ American Urological Association                                 |
| 22 | ASTRO    | American Society for Therapeutic Radiology and Oncology                                                |
| 23 | BASEC    | Business Administration System for Ethical Committees                                                  |
| 24 | bRFS     | Biochemical relapse-free survival                                                                      |
| 25 | CA       | Clinical approval                                                                                      |
| 26 | CBCT     | Cone Beam CT                                                                                           |
| 27 | CEC      | Clinical ethics committee                                                                              |
| 28 | ClinO    | Ordinance on Clinical Trials in Human Research (in German: KlinV, in French: OClin, in Italian: OSRUm) |
| 29 | CRF      | Case Report Form                                                                                       |
| 30 | CTCAE    | Common Terminology Criteria for Adverse Events                                                         |
| 31 | CTU      | Clinical trials unit                                                                                   |
| 32 | CTV      | Clinical target volume                                                                                 |
| 33 | DCE      | Dynamic contrast enhancement                                                                           |
| 34 | DEGRO    | German Society of radiation oncology                                                                   |
| 35 | DFS      | Disease free survival                                                                                  |
| 36 | DRE      | Digital rectal examination                                                                             |
| 37 | DVH      | Dose-volume histogram                                                                                  |
| 38 | DWI      | Diffusion-weighted imaging                                                                             |
| 39 | EAU      | European Association of Urology                                                                        |

|                        |                                                                                    |
|------------------------|------------------------------------------------------------------------------------|
| EORTC                  | European Organisation for Research and Treatment of Cancer                         |
| <sup>18</sup> F        | Fluorine-18                                                                        |
| FADP                   | Federal Act on Data Protection (in German: DSGVO, in French: LPD, in Italian: LPD) |
| FOPH                   | Federal Office of Public Health                                                    |
| <sup>18</sup> F-DCFPYL | Pylarify - piflufolastat Fluorine-18                                               |
| eCRF                   | Electronic Case Report Form                                                        |
| <sup>68</sup> Ga       | Gallium-68                                                                         |
| GCP                    | Good Clinical Practice                                                             |
| GTV                    | Gross tumor volume                                                                 |
| GI                     | Gastrointestinal                                                                   |
| GU                     | Genitourinary                                                                      |
| HR                     | Hazard ratio                                                                       |
| HRA                    | Human Research Act (in German: HFG, in French: LRH, in Italian: LRUm)              |
| ICH                    | International Conference on Harmonisation                                          |
| IGRT                   | Image-guided radiotherapy                                                          |
| IMRT                   | Intensity-modulated radiotherapy                                                   |
| LHRH                   | Luteinizing hormone-releasing hormone                                              |
| LHRHa                  | Luteinizing hormone-releasing hormone agonist                                      |
| MFS                    | Metastasis free survival                                                           |
| mpMRI                  | Multiparametric magnetic resonance imaging                                         |
| MRI                    | Magnetic resonance imaging                                                         |
| NCI                    | National cancer institute                                                          |
| NTCP                   | Normal tissue complication probability                                             |
| NTD                    | Normalized total dose                                                              |
| NCCN                   | National comprehensive cancer network                                              |
| OAR                    | Organs at risk                                                                     |
| OS                     | Overall survival                                                                   |
| OSEM                   | Ordered subset expectation maximization                                            |
| PET/CT                 | Positron electron computed tomography                                              |
| PFS                    | Progression-free survival                                                          |
| PI                     | Principal Investigator                                                             |
| PRV                    | Planning organ at risk volume                                                      |

|      |                                       |
|------|---------------------------------------|
| PSA  | Prostate-specific antigen             |
| PSF  | Point-spread-function                 |
| PSMA | Prostate-specific membrane antigen    |
| PTV  | Planning target volume                |
| RP   | Radical prostatectomy                 |
| RT   | Radiotherapy                          |
| RTOG | Radiation therapy oncology group      |
| SAE  | Serious Adverse Event                 |
| SBRT | Stereotactic body radiotherapy        |
| SI   | Signal intensity                      |
| sRT  | Salvage radiotherapy                  |
| TLC  | Thin layer chromatography             |
| TMF  | Trial master file                     |
| TNM  | Tumor Nodes Metastases                |
| TOF  | Time of flight                        |
| UICC | Union internationale contre le cancer |
| UPN  | Unique Patient Number                 |
| VUA  | Vesicourethral anastomosis            |
| WHO  | World health organization             |
| QLQ  | Quality of life questionnaire         |
| QoL  | Quality of life                       |

396

1  
2  
3 397 **Acknowledgment:** None.  
4

5  
6 398 **Authors' contributions:** EM, AA, DRZ, JL, CZ, BDB, DMA, and TZ contributed to the conception and  
7 399 design of the protocol, statistical design and initial drafting of the protocol. MS is the principal  
8  
9 400 investigator. All authors contributed to the quality, conception, design of the protocol, and establishment  
10 401 of study specific documents.  
11

12  
13 402 **Funding and publication:** Debiopharm AG and Berger-Janser Stiftung support this clinical trial  
14 403 financially. The funders did not and will not play any part in the study design, collection, management,  
15 404 analysis, and interpretation of data; writing of the report; and the decision to submit the report for  
16 405 publication. The results will be published in the name of the Hypo-FOCAL-SRT trial in a peer reviewed  
17 406 international journal on behalf of all collaborators. All presentations and publications, including abstracts,  
18 407 relating to the trial must be authorized by the Hypo-FOCAL-SRT trial steering committee. Participating  
19 408 centers should ask for the approval of the trial steering committee to use any data related to the patients  
20 409 registered in the trial.  
21

22  
23  
24  
25  
26 410 **Availability of data and materials:** The dataset analyzed during the current study is available from the  
27 411 corresponding author on reasonable request.  
28  
29

## 30 31 412 **Declarations** 32 33

34 413 **Ethical approval, protocol registration, and consent to participate:** The study was got a permission  
35 414 from the regional ethics committees (KEK-BE 2022-01026), the research is registered with  
36 415 ClinicalTrials.gov (NCT05746806) and the Swiss National Clinical Trials Portal. Written, informed  
37 416 consent to participate is and will be obtained from all participants before participating in the trial.  
38  
39

40  
41 417 **Consent for publication:** Not applicable.  
42  
43

44 418 **Conflict of Interest:** The authors declare that they have no competing interests.  
45  
46

47 419  
48

49 420  
50  
51  
52  
53  
54  
55  
56  
57  
58  
59  
60

1  
2  
3  
4  
5  
6  
7  
8  
9  
10  
11  
12  
13  
14  
15  
16  
17  
18  
19  
20  
21  
22  
23  
24  
25  
26  
27  
28  
29  
30  
31  
32  
33  
34  
35  
36  
37  
38  
39  
40  
41  
42  
43  
44  
45  
46  
47  
48  
49  
50  
51  
52  
53  
54  
55  
56  
57  
58  
59  
60

421 **Figure ligands:**

422 **Figure 1:** Summary of the study design and schedule.

For peer review only

1  
2  
3 423  
4  
56 424 **4 References**  
7

- 8  
9 425 1. Hamdy FC, Donovan JL, Lane JA, Mason M, Metcalfe C, Holding P, et al. 10-Year Outcomes  
10 426 after Monitoring, Surgery, or Radiotherapy for Localized Prostate Cancer. *N Engl J Med*.  
11 427 2016;375:1415–24.
- 12  
13 428 2. Gandaglia G, Briganti A, Clarke N, Karnes RJ, Graefen M, Ost P, et al. Adjuvant and Salvage  
14 429 Radiotherapy after Radical Prostatectomy in Prostate Cancer Patients. *Eur Urol*. 2017;72:689–  
15 430 709.
- 16  
17 431 3. Han M, Partin AW, Zahurak M, Piantadosi S, Epstein JI, Walsh PC. Biochemical (prostate  
18 432 specific antigen) recurrence probability following radical prostatectomy for clinically localized  
19 433 prostate cancer. *J Urol*. 2003;169:517–23.
- 20  
21 434 4. Bolla M, van Poppel H, Collette L, van Cangh P, Vekemans K, Da Pozzo L, et al.  
22 435 Postoperative radiotherapy after radical prostatectomy: a randomised controlled trial (EORTC  
23 436 trial 22911). *Lancet*. 2005;366:572–8.
- 24  
25 437 5. Bolla M, van Poppel H, Tombal B, Vekemans K, Da Pozzo L, de Reijke TM, et al.  
26 438 Postoperative radiotherapy after radical prostatectomy for high-risk prostate cancer: long-term  
27 439 results of a randomised controlled trial (EORTC trial 22911). *Lancet*. 2012;380:2018–27.
- 28  
29 440 6. Thompson IM, Tangen CM, Paradelo J, Lucia MS, Miller G, Troyer D, et al. Adjuvant  
30 441 radiotherapy for pathologically advanced prostate cancer: a randomized clinical trial. *JAMA*.  
31 442 2006;296:2329–35.
- 32  
33 443 7. Thompson IM, Tangen CM, Paradelo J, Lucia MS, Miller G, Troyer D, et al. Adjuvant  
34 444 radiotherapy for pathological T3N0M0 prostate cancer significantly reduces risk of metastases  
35 445 and improves survival: long-term follow-up of a randomized clinical trial. *J Urol*. 2009;181:956–  
36 446 62.
- 37  
38 447 8. Wiegel T, Bottke D, Steiner U, Siegmann A, Golz R, Störkel S, et al. Phase III postoperative  
39 448 adjuvant radiotherapy after radical prostatectomy compared with radical prostatectomy alone in  
40 449 pT3 prostate cancer with postoperative undetectable prostate-specific antigen: ARO 96-02/AUO  
41 450 AP 09/95. *J Clin Oncol*. 2009;27:2924–30.
- 42  
43 451 9. Kneebone A, Fraser-Browne C, Duchesne GM, Fisher R, Frydenberg M, Herschtal A, et al.  
44 452 Adjuvant radiotherapy versus early salvage radiotherapy following radical prostatectomy (TROG  
45 453 08.03/ANZUP RAVES): a randomised, controlled, phase 3, non-inferiority trial. *Lancet Oncol*.  
46 454 2020;21:1331–40.
- 47  
48 455 10. Parker CC, Clarke NW, Cook AD, Kynaston HG, Petersen PM, Catton C, et al. Timing of  
49 456 radiotherapy after radical prostatectomy (RADICALS-RT): a randomised, controlled phase 3  
50 457 trial. *Lancet*. 2020;396:1413–21.
- 51  
52 458 11. Vale CL, Fisher D, Kneebone A, Parker C, Pearse M, Richaud P, et al. Adjuvant or early  
53 459 salvage radiotherapy for the treatment of localised and locally advanced prostate cancer: a  
54 460 prospectively planned systematic review and meta-analysis of aggregate data. *Lancet*.



- 1  
2  
3 461 2020;396:1422–31.  
4  
5 462 12. Sargos P, Chabaud S, Latorzeff I, Magné N, Benyoucef A, Supiot S, et al. Adjuvant  
6 463 radiotherapy versus early salvage radiotherapy plus short-term androgen deprivation therapy in  
7 464 men with localised prostate cancer after radical prostatectomy (GETUG-AFU 17): a randomised,  
8 465 phase 3 trial. *Lancet Oncol.* 2020;21:1341–52.  
9  
10 466 13. Boike TP, Lotan Y, Cho LC, Brindle J, DeRose P, Xie X-J, et al. Phase I dose-escalation  
11 467 study of stereotactic body radiation therapy for low- and intermediate-risk prostate cancer. *J Clin*  
12 468 *Oncol.* 2011;29:2020–6.  
13  
14 469 14. Brand DH, Tree AC, Ostler P, van der Voet H, Loblaw A, Chu W, et al. Intensity-modulated  
15 470 fractionated radiotherapy versus stereotactic body radiotherapy for prostate cancer (PACE-B):  
16 471 acute toxicity findings from an international, randomised, open-label, phase 3, non-inferiority  
17 472 trial. *Lancet Oncol.* 2019;20:1531–43.  
18  
19 473 15. Chen LN, Suy S, Uhm S, Oermann EK, Ju AW, Chen V, et al. Stereotactic body radiation  
20 474 therapy (SBRT) for clinically localized prostate cancer: the Georgetown University experience.  
21 475 *Radiat Oncol.* 2013;8:58.  
22  
23 476 16. Jackson WC, Silva J, Hartman HE, Dess RT, Kishan AU, Beeler WH, et al. Stereotactic  
24 477 Body Radiation Therapy for Localized Prostate Cancer: A Systematic Review and Meta-  
25 478 Analysis of Over 6,000 Patients Treated On Prospective Studies. *Int J Radiat Oncol Biol Phys.*  
26 479 2019;104:778–89.  
27  
28 480 17. King CR, Brooks JD, Gill H, Presti JC. Long-term outcomes from a prospective trial of  
29 481 stereotactic body radiotherapy for low-risk prostate cancer. *Int J Radiat Oncol Biol Phys.*  
30 482 2012;82:877–82.  
31  
32 483 18. Kotecha R, Djemil T, Tendulkar RD, Reddy CA, Thousand RA, Vassil A, et al. Dose-  
33 484 Escalated Stereotactic Body Radiation Therapy for Patients With Intermediate- and High-Risk  
34 485 Prostate Cancer: Initial Dosimetry Analysis and Patient Outcomes. *Int J Radiat Oncol Biol Phys.*  
35 486 2016;95:960–4.  
36  
37 487 19. Meier RM, Bloch DA, Cotrutz C, Beckman AC, Henning GT, Woodhouse SA, et al.  
38 488 Multicenter Trial of Stereotactic Body Radiation Therapy for Low- and Intermediate-Risk  
39 489 Prostate Cancer: Survival and Toxicity Endpoints. *Int J Radiat Oncol Biol Phys.* 2018;102:296–  
40 490 303.  
41  
42 491 20. Zilli T, Franzese C, Bottero M, Giaj-Levra N, Förster R, Zwahlen D, et al. Single fraction  
43 492 urethra-sparing prostate cancer SBRT: Phase I results of the ONE SHOT trial. *Radiother Oncol.*  
44 493 2019;139:83–6.  
45  
46 494 21. Bauman G, Ferguson M, Lock M, Chen J, Ahmad B, Venkatesan VM, et al. A Phase 1/2  
47 495 Trial of Brief Androgen Suppression and Stereotactic Radiation Therapy (FASTR) for High-Risk  
48 496 Prostate Cancer. *Int J Radiat Oncol Biol Phys.* 2015;92:856–62.  
49  
50 497 22. Callan L, Bauman G, Chen J, Lock M, Sexton T, D'Souza D, et al. A Phase I/II Trial of Fairly  
51 498 Brief Androgen Suppression and Stereotactic Radiation Therapy for High-Risk Prostate Cancer  
52 499 (FASTR-2): Preliminary Results and Toxicity Analysis. *Adv Radiat Oncol.* 2019;4:668–73.  
53  
54 500 23. Foerster R, Zwahlen DR, Buchali A, Tang H, Schroeder C, Windisch P, et al. Stereotactic  
55  
56  
57  
58  
59  
60

- 1  
2  
3 501 Body Radiotherapy for High-Risk Prostate Cancer: A Systematic Review. *Cancers (Basel)*.  
4 502 2021;13.  
5  
6 503 24. Murthy V, Gupta M, Mulye G, Maulik S, Munshi M, Krishnatry R, et al. Early Results of  
7 504 Extreme Hypofractionation Using Stereotactic Body Radiation Therapy for High-risk, Very High-  
8 505 risk and Node-positive Prostate Cancer. *Clin Oncol (R Coll Radiol)*. 2018;30:442–7.  
9  
10 506 25. Widmark A, Gunnlaugsson A, Beckman L, Thellenberg-Karlsson C, Hoyer M, Lagerlund M,  
11 507 et al. Ultra-hypofractionated versus conventionally fractionated radiotherapy for prostate cancer:  
12 508 5-year outcomes of the HYPO-RT-PC randomised, non-inferiority, phase 3 trial. *Lancet*.  
13 509 2019;394:385–95.  
14  
15 510 26. Zilli T, Jorcano S, Bral S, Rubio C, Bruynzeel AME, Oliveira A, et al. Once-a-week or every-  
16 511 other-day urethra-sparing prostate cancer stereotactic body radiotherapy, a randomized phase  
17 512 II trial: 18 months follow-up results. *Cancer Med*. 2020;9:3097–106.  
18  
19 513 27. Brenner DJ, Martinez AA, Edmundson GK, Mitchell C, Thames HD, Armour EP. Direct  
20 514 evidence that prostate tumors show high sensitivity to fractionation (low  $\alpha/\beta$  ratio), similar to  
21 515 late-responding normal tissue. *International Journal of Radiation Oncology\*Biophysics\*Physics*.  
22 516 2002;52:6–13.  
23  
24 517 28. Miralbell R, Roberts SA, Zubizarreta E, Hendry JH. Dose-fractionation sensitivity of prostate  
25 518 cancer deduced from radiotherapy outcomes of 5,969 patients in seven international institutional  
26 519 datasets:  $\alpha/\beta = 1.4$  (0.9-2.2) Gy. *Int J Radiat Oncol Biol Phys*. 2012;82:e17-24.  
27  
28 520 29. Chan A-W, Tetzlaff JM, Altman DG, Laupacis A, Gøtzsche PC, Krleža-Jerić K, et al. SPIRIT  
29 521 2013 statement: defining standard protocol items for clinical trials. *Ann Intern Med*.  
30 522 2013;158:200–7.  
31  
32 523 30. Shelan M, Odermatt S, Bojaxhiu B, Nguyen DP, Thalmann GN, Aebbersold DM, et al.  
33 524 Disease control with delayed salvage radiotherapy for macroscopic local recurrence following  
34 525 radical prostatectomy. *Front Oncol*. 2019;9:12.  
35  
36 526 31. Ghadjar P, Hayoz S, Bernhard J, Zwahlen DR, Hölscher T, Gut P, et al. Dose-intensified  
37 527 Versus Conventional-dose Salvage Radiotherapy for Biochemically Recurrent Prostate Cancer  
38 528 After Prostatectomy: The SAKK 09/10 Randomized Phase 3 Trial. *Eur Urol*. 2021;80:306–15.  
39  
40 529 32. Zilli T, Jorcano S, Peguret N, Caparrotti F, Hidalgo A, Khan HG, et al. Results of Dose-  
41 530 adapted Salvage Radiotherapy After Radical Prostatectomy Based on an Endorectal MRI  
42 531 Target Definition Model. *Am J Clin Oncol*. 2017;40:194–9.  
43  
44 532 33. Benziane-Ouaritini N, Zilli T, Giraud A, Ingrosso G, Di Staso M, Trippa F, et al.  
45 533 Prostatectomy Bed Image-guided Dose-escalated Salvage Radiotherapy (SPIDER): An  
46 534 International Multicenter Retrospective Study. *Eur Urol Oncol*. 2023.  
47  
48 535 34. NRG > About Us > Center for Innovation in Radiation Oncology > Male RTOG Normal  
49 536 Pelvis. [https://www.nrgoncology.org/About-Us/Center-for-Innovation-in-Radiation-](https://www.nrgoncology.org/About-Us/Center-for-Innovation-in-Radiation-Oncology/Male-RTOG-Normal-Pelvis)  
50 537 [Oncology/Male-RTOG-Normal-Pelvis](https://www.nrgoncology.org/About-Us/Center-for-Innovation-in-Radiation-Oncology/Male-RTOG-Normal-Pelvis). Accessed 19 Mar 2023.  
51  
52 538 35. 2023 Summaries and Changes of the Prostate Cancer guideline - Uroweb.  
53 539 <https://uroweb.org/guidelines/prostate-cancer/summary-of-changes>. Accessed 13 Apr 2023.  
54  
55  
56  
57  
58  
59  
60

- 1  
2  
3 540 36. Nguyen PL, Alibhai SMH, Basaria S, D'Amico AV, Kantoff PW, Keating NL, et al. Adverse  
4 541 effects of androgen deprivation therapy and strategies to mitigate them. *Eur Urol.* 2015;67:825–  
5 542 36.
- 7 543 37. Hamdy FC, Donovan JL, Lane JA, Metcalfe C, Davis M, Turner EL, et al. Fifteen-Year  
8 544 Outcomes after Monitoring, Surgery, or Radiotherapy for Prostate Cancer. *N Engl J Med.* 2023.
- 10 545 38. Fowler JF. The radiobiology of prostate cancer including new aspects of fractionated  
11 546 radiotherapy. *Acta Oncol.* 2005;44:265–76.
- 13 547 39. Hickey BE, James ML, Daly T, Soh F-Y, Jeffery M. Hypofractionation for clinically localized  
14 548 prostate cancer. *Cochrane Database Syst Rev.* 2019;9:CD011462.
- 16 549 40. NCCN Guidelines. <https://www.nccn.org/guidelines/nccn-guidelines>. Accessed 13 Apr 2023.
- 17 550 41. Wolf F, Sedlmayer F, Aebbersold D, Albrecht C, Böhmer D, Flentje M, et al.  
18 551 Ultrahypofractionation of localized prostate cancer : Statement from the DEGRO working group  
19 552 prostate cancer. *Strahlenther Onkol.* 2021;197:89–96.
- 21 553 42. Zerini D, Jereczek-Fossa BA, Fodor C, Bazzani F, Maucieri A, Ronchi S, et al. Salvage  
22 554 image-guided intensity modulated or stereotactic body reirradiation of local recurrence of  
23 555 prostate cancer. *Br J Radiol.* 2015;88:20150197.
- 25 556 43. Scher N, Bauduceau O, Bollet M, Lamallem H, Charas T, Garaud P, et al. Stereotactic  
26 557 prostate focal reirradiation therapy for local recurrence: preliminary results of Hartmann  
27 558 Oncology Radiotherapy Group. *BJR Open.* 2019;1:20180027.
- 29 559 44. Tree AC, Ostler P, van der Voet H, Chu W, Loblaw A, Ford D, et al. Intensity-modulated  
30 560 radiotherapy versus stereotactic body radiotherapy for prostate cancer (PACE-B): 2-year toxicity  
31 561 results from an open-label, randomised, phase 3, non-inferiority trial. *Lancet Oncol.*  
32 562 2022;23:1308–20.
- 34 563 45. Picardi C, Perret I, Miralbell R, Zilli T. Hypofractionated radiotherapy for prostate cancer in  
35 564 the postoperative setting: What is the evidence so far? *Cancer Treat Rev.* 2018;62:91–6.
- 37 565 46. Tandberg DJ, Oyekunle T, Lee WR, Wu Y, Salama JK, Koontz BF. Postoperative radiation  
38 566 therapy for prostate cancer: comparison of conventional versus hypofractionated radiation  
39 567 regimens. *Int J Radiat Oncol Biol Phys.* 2018;101:396–405.
- 41 568 47. Parikh NR, Kishan AU, Kane N, Diaz-Perez S, Ganapathy E, Nazarian R, et al. Phase 1  
42 569 Trial of Stereotactic Body Radiation Therapy Neoadjuvant to Radical Prostatectomy for Patients  
43 570 With High-Risk Prostate Cancer. *Int J Radiat Oncol Biol Phys.* 2020;108:930–5.
- 45 571 48. Sampath S, Frankel P, Vecchio BD, Ruel N, Yuh B, Liu A, et al. Stereotactic Body Radiation  
46 572 Therapy to the Prostate Bed: Results of a Phase 1 Dose-Escalation Trial. *Int J Radiat Oncol Biol*  
47 573 *Phys.* 2020;106:537–45.
- 49 574 49. Francolini G, Jereczek-Fossa BA, Di Cataldo V, Simontacchi G, Marvaso G, Gandini S, et  
50 575 al. Stereotactic or conventional radiotherapy for macroscopic prostate bed recurrence: a  
51 576 propensity score analysis. *Radiol Med.* 2022;127:449–57.
- 53 577 50. Ma TM, Ballas LK, Wilhalme H, Sachdeva A, Chong N, Sharma S, et al. Quality-of-Life  
54 578 Outcomes and Toxicity Profile Among Patients With Localized Prostate Cancer After Radical

1  
2  
3 579 Prostatectomy Treated With Stereotactic Body Radiation: The SCIMITAR Multicenter Phase 2  
4 580 Trial. Int J Radiat Oncol Biol Phys. 2023;115:142–52.  
5  
6  
7  
8  
9  
10  
11  
12  
13  
14  
15  
16  
17  
18  
19  
20  
21  
22  
23  
24  
25  
26  
27  
28  
29  
30  
31  
32  
33  
34  
35  
36  
37  
38  
39  
40  
41  
42  
43  
44  
45  
46  
47  
48  
49  
50  
51  
52  
53  
54  
55  
56  
57  
58  
59  
60

For peer review only

1  
2  
3  
4  
5  
6  
7  
8  
9  
10  
11  
12  
13  
14  
15  
16  
17  
18  
19  
20  
21  
22  
23  
24  
25  
26  
27  
28  
29  
30  
31  
32  
33  
34  
35  
36  
37  
38  
39  
40  
41  
42  
43  
44  
45  
46  
47  
48  
49  
50  
51  
52  
53  
54  
55  
56  
57  
58  
59  
60

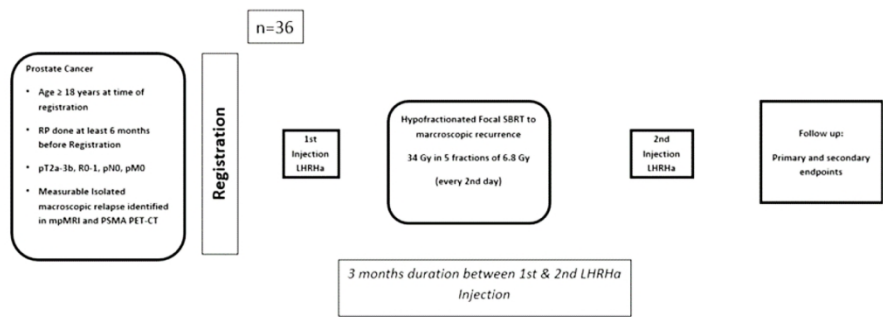

Figure 1: Summary of the study design and schedule.

159x65mm (300 x 300 DPI)

## SPIRIT Checklist for *Trials*

Complete this checklist by entering the page and line numbers where each of the items listed below can be found in your manuscript.

Your manuscript may not currently address all the items on the checklist. Please modify your text to include the missing information. If you are certain that an item does not apply, please state "n/a" and provide a short explanation. **Leaving an item blank or stating "n/a" without an explanation will lead to your manuscript being returned before review.**

Upload your completed checklist as an additional file when you submit to *Trials*. You must reference this additional file in the main text of your protocol submission. The completed SPIRIT figure must be included within the main body of the protocol text and can be downloaded here: <http://www.spirit-statement.org/schedule-of-enrolment-interventions-and-assessments/>

In your methods section, please state that you used the SPIRIT reporting guidelines, and cite them as:

Chan A-W, Tetzlaff JM, Gøtzsche PC, Altman DG, Mann H, Berlin J, Dickersin K, Hróbjartsson A, Schulz KF, Parulekar WR, Krleža-Jerić K, Laupacis A, Moher D. SPIRIT 2013 Explanation and Elaboration: Guidance for protocols of clinical trials. *BMJ*. 2013;346:e7586

|                                   | Reporting Item      |                                                                                                              | Page and Line Number | Reason if not applicable |
|-----------------------------------|---------------------|--------------------------------------------------------------------------------------------------------------|----------------------|--------------------------|
| <b>Administrative information</b> |                     |                                                                                                              |                      |                          |
| Title                             | <a href="#">#1</a>  | Descriptive title identifying the study design, population, interventions, and, if applicable, trial acronym | 1: 1-3               |                          |
| Trial registration                | <a href="#">#2a</a> | Trial identifier and registry name. If not yet registered, name of intended registry                         | 4: 86-87             |                          |
| Trial registration: data set      | <a href="#">#2b</a> | All items from the World Health Organization Trial Registration Data Set                                     | 4: 86-87             |                          |
| Protocol version                  | <a href="#">#3</a>  | Date and version identifier                                                                                  | 4: 88-89             |                          |

|                                                          |                                                         |                     |                                                                                                                                                                                                                                                                                          |             |  |
|----------------------------------------------------------|---------------------------------------------------------|---------------------|------------------------------------------------------------------------------------------------------------------------------------------------------------------------------------------------------------------------------------------------------------------------------------------|-------------|--|
| 1<br>2<br>3                                              | Funding                                                 | <a href="#">#4</a>  | Sources and types of financial, material, and other support                                                                                                                                                                                                                              | 19: 393-400 |  |
| 4<br>5<br>6<br>7<br>8                                    | Roles and responsibilities: contributorship             | <a href="#">#5a</a> | Names, affiliations, and roles of protocol contributors                                                                                                                                                                                                                                  | 19: 389-392 |  |
| 9<br>10<br>11<br>12<br>13                                | Roles and responsibilities: sponsor contact information | <a href="#">#5b</a> | Name and contact information for the trial sponsor                                                                                                                                                                                                                                       | 19: 389-392 |  |
| 14<br>15<br>16<br>17<br>18<br>19<br>20<br>21<br>22<br>23 | Roles and responsibilities: sponsor and funder          | <a href="#">#5c</a> | Role of study sponsor and funders, if any, in study design; collection, management, analysis, and interpretation of data; writing of the report; and the decision to submit the report for publication, including whether they will have ultimate authority over any of these activities | 19: 389-392 |  |
| 24<br>25<br>26<br>27<br>28<br>29<br>30<br>31<br>32<br>33 | Roles and responsibilities: committees                  | <a href="#">#5d</a> | Composition, roles, and responsibilities of the coordinating centre, steering committee, endpoint adjudication committee, data management team, and other individuals or groups overseeing the trial, if applicable (see Item 21a for data monitoring committee)                         | 19: 389-392 |  |
| 34<br>35                                                 | <b>Introduction</b>                                     |                     |                                                                                                                                                                                                                                                                                          | 3: 52-82    |  |
| 36<br>37<br>38<br>39<br>40<br>41<br>42<br>43<br>44       | Background and rationale                                | <a href="#">#6a</a> | Description of research question and justification for undertaking the trial, including summary of relevant studies (published and unpublished) examining benefits and harms for each intervention                                                                                       | 3: 52-82    |  |

|                                              |                                                           |                      |                                                                                                                                                                                                            |               |  |
|----------------------------------------------|-----------------------------------------------------------|----------------------|------------------------------------------------------------------------------------------------------------------------------------------------------------------------------------------------------------|---------------|--|
| 1<br>2<br>3<br>4<br>5                        | Background and rationale: choice of comparators           | <a href="#">#6b</a>  | Explanation for choice of comparators                                                                                                                                                                      | 3: 52-82      |  |
| 6<br>7                                       | Objectives                                                | <a href="#">#7</a>   | Specific objectives or hypotheses                                                                                                                                                                          | 3: 52-82      |  |
| 8<br>9<br>10<br>11<br>12<br>13<br>14<br>15   | Trial design                                              | <a href="#">#8</a>   | Description of trial design including type of trial (eg, parallel group, crossover, factorial, single group), allocation ratio, and framework (eg, superiority, equivalence, non-inferiority, exploratory) | 3: 80 -82     |  |
| 16                                           | <b>Methods: Participants, interventions, and outcomes</b> |                      |                                                                                                                                                                                                            |               |  |
| 17<br>18<br>19<br>20<br>21<br>22<br>23<br>24 | Study setting                                             | <a href="#">#9</a>   | Description of study settings (eg, community clinic, academic hospital) and list of countries where data will be collected. Reference to where list of study sites can be obtained                         | 4: 86-91      |  |
| 25<br>26<br>27<br>28<br>29<br>30<br>31       | Eligibility criteria                                      | <a href="#">#10</a>  | Inclusion and exclusion criteria for participants. If applicable, eligibility criteria for study centres and individuals who will perform the interventions (eg, surgeons, psychotherapists)               | 4, 5: 92-130  |  |
| 32<br>33<br>34<br>35<br>36                   | Interventions: description                                | <a href="#">#11a</a> | Interventions for each group with sufficient detail to allow replication, including how and when they will be administered                                                                                 | 7-11: 178-286 |  |
| 37<br>38<br>39<br>40<br>41<br>42<br>43       | Interventions: modifications                              | <a href="#">#11b</a> | Criteria for discontinuing or modifying allocated interventions for a given trial participant (eg, drug dose change in response to harms, participant request, or improving / worsening disease)           | 7-11: 178-286 |  |

1  
2  
3  
4  
5  
6  
7  
8  
9  
10  
11  
12  
13  
14  
15  
16  
17  
18  
19  
20  
21  
22  
23  
24  
25  
26  
27  
28  
29  
30  
31  
32  
33  
34  
35  
36  
37  
38  
39  
40  
41  
42  
43  
44  
45  
46  
47



|                                                                      |                                 |                      |                                                                                                                                                                                                                                                                                                                                                                                |               |  |
|----------------------------------------------------------------------|---------------------------------|----------------------|--------------------------------------------------------------------------------------------------------------------------------------------------------------------------------------------------------------------------------------------------------------------------------------------------------------------------------------------------------------------------------|---------------|--|
| 1<br>2<br>3<br>4<br>5<br>6                                           | Interventions: adherence        | <a href="#">#11c</a> | Strategies to improve adherence to intervention protocols, and any procedures for monitoring adherence (eg, drug tablet return; laboratory tests)                                                                                                                                                                                                                              | 7-11: 178-286 |  |
| 7<br>8<br>9<br>10                                                    | Interventions: concomitant care | <a href="#">#11d</a> | Relevant concomitant care and interventions that are permitted or prohibited during the trial                                                                                                                                                                                                                                                                                  | 7-11: 178-286 |  |
| 11<br>12<br>13<br>14<br>15<br>16<br>17<br>18<br>19<br>20<br>21<br>22 | Outcomes                        | <a href="#">#12</a>  | Primary, secondary, and other outcomes, including the specific measurement variable (eg, systolic blood pressure), analysis metric (eg, change from baseline, final value, time to event), method of aggregation (eg, median, proportion), and time point for each outcome. Explanation of the clinical relevance of chosen efficacy and harm outcomes is strongly recommended | 7: 169: 177   |  |
| 23<br>24<br>25<br>26<br>27<br>28<br>29<br>30                         | Participant timeline            | <a href="#">#13</a>  | Time schedule of enrolment, interventions (including any run-ins and washouts), assessments, and visits for participants. A schematic diagram is highly recommended (see Figure)                                                                                                                                                                                               | 6: 151-163    |  |
| 31<br>32<br>33<br>34<br>35<br>36<br>37<br>38                         | Sample size                     | <a href="#">#14</a>  | Estimated number of participants needed to achieve study objectives and how it was determined, including clinical and statistical assumptions supporting any sample size calculations                                                                                                                                                                                          | 6: 151-163    |  |
| 39<br>40<br>41<br>42<br>43                                           | Recruitment                     | <a href="#">#15</a>  | Strategies for achieving adequate participant enrolment to reach target sample size                                                                                                                                                                                                                                                                                            | 6, 6: 131-149 |  |

| <b>Methods: Assignment of interventions (for controlled trials)</b> |                      |                                                                                                                                                                                                                                                                                                                                                          |     |                      |
|---------------------------------------------------------------------|----------------------|----------------------------------------------------------------------------------------------------------------------------------------------------------------------------------------------------------------------------------------------------------------------------------------------------------------------------------------------------------|-----|----------------------|
| Allocation: sequence generation                                     | <a href="#">#16a</a> | Method of generating the allocation sequence (eg, computer-generated random numbers), and list of any factors for stratification. To reduce predictability of a random sequence, details of any planned restriction (eg, blocking) should be provided in a separate document that is unavailable to those who enrol participants or assign interventions | N/A | Not controlled trial |
| Allocation concealment mechanism                                    | <a href="#">#16b</a> | Mechanism of implementing the allocation sequence (eg, central telephone; sequentially numbered, opaque, sealed envelopes), describing any steps to conceal the sequence until interventions are assigned                                                                                                                                                | N/A | Not controlled trial |
| Allocation: implementation                                          | <a href="#">#16c</a> | Who will generate the allocation sequence, who will enrol participants, and who will assign participants to interventions                                                                                                                                                                                                                                | N/A | Not controlled trial |
| Blinding (masking)                                                  | <a href="#">#17a</a> | Who will be blinded after assignment to interventions (eg, trial participants, care providers, outcome assessors, data analysts), and how                                                                                                                                                                                                                | N/A | Not controlled trial |
| Blinding (masking): emergency unblinding                            | <a href="#">#17b</a> | If blinded, circumstances under which unblinding is permissible, and procedure for revealing a participant's allocated intervention during the trial                                                                                                                                                                                                     | N/A | Not controlled trial |
| <b>Methods: Data collection, management, and analysis</b>           |                      |                                                                                                                                                                                                                                                                                                                                                          |     |                      |

|                                                                   |                                 |                      |                                                                                                                                                                                                                                                                                                                                                                                                              |               |  |
|-------------------------------------------------------------------|---------------------------------|----------------------|--------------------------------------------------------------------------------------------------------------------------------------------------------------------------------------------------------------------------------------------------------------------------------------------------------------------------------------------------------------------------------------------------------------|---------------|--|
| 1<br>2<br>3<br>4<br>5<br>6<br>7<br>8<br>9<br>10<br>11<br>12<br>13 | Data collection plan            | <a href="#">#18a</a> | Plans for assessment and collection of outcome, baseline, and other trial data, including any related processes to promote data quality (eg, duplicate measurements, training of assessors) and a description of study instruments (eg, questionnaires, laboratory tests) along with their reliability and validity, if known. Reference to where data collection forms can be found, if not in the protocol | 5, 6: 131-149 |  |
| 14<br>15<br>16<br>17<br>18<br>19<br>20<br>21<br>22                | Data collection plan: retention | <a href="#">#18b</a> | Plans to promote participant retention and complete follow-up, including list of any outcome data to be collected for participants who discontinue or deviate from intervention protocols                                                                                                                                                                                                                    | 5, 6: 131-149 |  |
| 23<br>24<br>25<br>26<br>27<br>28<br>29<br>30<br>31                | Data management                 | <a href="#">#19</a>  | Plans for data entry, coding, security, and storage, including any related processes to promote data quality (eg, double data entry; range checks for data values). Reference to where details of data management procedures can be found, if not in the protocol                                                                                                                                            | 13: 290-303   |  |
| 32<br>33<br>34<br>35<br>36<br>37<br>38                            | Statistics: outcomes            | <a href="#">#20a</a> | Statistical methods for analysing primary and secondary outcomes. Reference to where other details of the statistical analysis plan can be found, if not in the protocol                                                                                                                                                                                                                                     | 13: 290-303   |  |
| 39<br>40<br>41<br>42                                              | Statistics: additional analyses | <a href="#">#20b</a> | Methods for any additional analyses (eg, subgroup and adjusted analyses)                                                                                                                                                                                                                                                                                                                                     | 13: 290-303   |  |

|                                                                      |                                                  |                      |                                                                                                                                                                                                                                                                                                                                       |             |                     |
|----------------------------------------------------------------------|--------------------------------------------------|----------------------|---------------------------------------------------------------------------------------------------------------------------------------------------------------------------------------------------------------------------------------------------------------------------------------------------------------------------------------|-------------|---------------------|
| 1<br>2<br>3<br>4<br>5<br>6                                           | Statistics: analysis population and missing data | <a href="#">#20c</a> | Definition of analysis population relating to protocol non-adherence (eg, as randomised analysis), and any statistical methods to handle missing data (eg, multiple imputation)                                                                                                                                                       | 13: 305-310 |                     |
| 7<br>8<br>9                                                          | <b>Methods: Monitoring</b>                       |                      |                                                                                                                                                                                                                                                                                                                                       |             |                     |
| 10<br>11<br>12<br>13<br>14<br>15<br>16<br>17<br>18<br>19<br>20<br>21 | Data monitoring: formal committee                | <a href="#">#21a</a> | Composition of data monitoring committee (DMC); summary of its role and reporting structure; statement of whether it is independent from the sponsor and competing interests; and reference to where further details about its charter can be found, if not in the protocol. Alternatively, an explanation of why a DMC is not needed | 5: 131-149  |                     |
| 22<br>23<br>24<br>25<br>26<br>27<br>28                               | Data monitoring: interim analysis                | <a href="#">#21b</a> | Description of any interim analyses and stopping guidelines, including who will have access to these interim results and make the final decision to terminate the trial                                                                                                                                                               | N/A         | No interim analysis |
| 29<br>30<br>31<br>32<br>33<br>34                                     | Harms                                            | <a href="#">#22</a>  | Plans for collecting, assessing, reporting, and managing solicited and spontaneously reported adverse events and other unintended effects of trial interventions or trial conduct                                                                                                                                                     | 7: 173      |                     |
| 35<br>36<br>37<br>38<br>39<br>40                                     | Auditing                                         | <a href="#">#23</a>  | Frequency and procedures for auditing trial conduct, if any, and whether the process will be independent from investigators and the sponsor                                                                                                                                                                                           | N/A         | No auditing         |
| 41<br>42<br>43<br>44<br>45<br>46<br>47                               | <b>Ethics and dissemination</b>                  |                      |                                                                                                                                                                                                                                                                                                                                       |             |                     |

|                                                                            |                                      |                      |                                                                                                                                                                                                                                    |               |                                |
|----------------------------------------------------------------------------|--------------------------------------|----------------------|------------------------------------------------------------------------------------------------------------------------------------------------------------------------------------------------------------------------------------|---------------|--------------------------------|
| 1<br>2<br>3                                                                | Research ethics approval             | <a href="#">#24</a>  | Plans for seeking research ethics committee / institutional review board (REC / IRB) approval                                                                                                                                      | 4: 86-91      |                                |
| 4<br>5<br>6<br>7<br>8<br>9<br>10<br>11                                     | Protocol amendments                  | <a href="#">#25</a>  | Plans for communicating important protocol modifications (eg, changes to eligibility criteria, outcomes, analyses) to relevant parties (eg, investigators, REC / IRBs, trial participants, trial registries, journals, regulators) | 4: 86-91      |                                |
| 12<br>13<br>14<br>15<br>16<br>17                                           | Consent or assent                    | <a href="#">#26a</a> | Who will obtain informed consent or assent from potential trial participants or authorised surrogates, and how (see Item 32)                                                                                                       | 4: 94-95      |                                |
| 18<br>19<br>20<br>21<br>22                                                 | Consent or assent: ancillary studies | <a href="#">#26b</a> | Additional consent provisions for collection and use of participant data and biological specimens in ancillary studies, if applicable                                                                                              | N/A           | This is not an ancillary study |
| 23<br>24<br>25<br>26<br>27<br>28<br>29                                     | Confidentiality                      | <a href="#">#27</a>  | How personal information about potential and enrolled participants will be collected, shared, and maintained in order to protect confidentiality before, during, and after the trial                                               | 5, 6: 131-149 |                                |
| 30<br>31<br>32<br>33<br>34                                                 | Declaration of interests             | <a href="#">#28</a>  | Financial and other competing interests for principal investigators for the overall trial and each study site                                                                                                                      | 19: 387-390   |                                |
| 35<br>36<br>37<br>38<br>39<br>40<br>41<br>42<br>43<br>44<br>45<br>46<br>47 | Data access                          | <a href="#">#29</a>  | Statement of who will have access to the final trial dataset, and disclosure of contractual agreements that limit such access for investigators                                                                                    | 5, 6: 131-149 |                                |

|                                                            |                                             |                      |                                                                                                                                                                                                                                                                                     |             |                                       |
|------------------------------------------------------------|---------------------------------------------|----------------------|-------------------------------------------------------------------------------------------------------------------------------------------------------------------------------------------------------------------------------------------------------------------------------------|-------------|---------------------------------------|
| 1<br>2<br>3<br>4<br>5                                      | Ancillary and post trial care               | <a href="#">#30</a>  | Provisions, if any, for ancillary and post-trial care, and for compensation to those who suffer harm from trial participation                                                                                                                                                       | 6: 159-163  |                                       |
| 6<br>7<br>8<br>9<br>10<br>11<br>12<br>13<br>14<br>15<br>16 | Dissemination policy: trial results         | <a href="#">#31a</a> | Plans for investigators and sponsor to communicate trial results to participants, healthcare professionals, the public, and other relevant groups (eg, via publication, reporting in results databases, or other data sharing arrangements), including any publication restrictions | 19: 393-400 |                                       |
| 17<br>18<br>19<br>20                                       | Dissemination policy: authorship            | <a href="#">#31b</a> | Authorship eligibility guidelines and any intended use of professional writers                                                                                                                                                                                                      | 19: 393-400 |                                       |
| 21<br>22<br>23<br>24<br>25                                 | Dissemination policy: reproducible research | <a href="#">#31c</a> | Plans, if any, for granting public access to the full protocol, participant-level dataset, and statistical code                                                                                                                                                                     | N/A         | No public access to the full protocol |
| 26<br>27                                                   | <b>Appendices</b>                           |                      |                                                                                                                                                                                                                                                                                     |             |                                       |
| 28<br>29<br>30<br>31<br>32                                 | Informed consent materials                  | <a href="#">#32</a>  | Model consent form and other related documentation given to participants and authorised surrogates                                                                                                                                                                                  | 19: 404-407 |                                       |
| 33<br>34<br>35<br>36<br>37<br>38<br>39                     | Biological specimens                        | <a href="#">#33</a>  | Plans for collection, laboratory evaluation, and storage of biological specimens for genetic or molecular analysis in the current trial and for future use in ancillary studies, if applicable                                                                                      | N/A         | This is not an ancillary study        |

It is strongly recommended that this checklist be read in conjunction with the SPIRIT 2013 Explanation & Elaboration for important clarification on the items. Amendments to the protocol should be tracked and dated. The SPIRIT checklist is copyrighted by the SPIRIT Group under the Creative Commons "[Attribution-](#)

40  
41  
42  
43  
44  
45  
46  
47

1 [NonCommercial-NoDerivs 3.0 Unported](#) license. This checklist can be completed online using <https://www.goodreports.org/>, a tool made by the EQUATOR  
2 Network in collaboration with Penelope.ai  
3  
4  
5  
6  
7  
8  
9  
10  
11  
12  
13  
14  
15  
16  
17  
18  
19  
20  
21  
22  
23  
24  
25  
26  
27  
28  
29  
30  
31  
32  
33  
34  
35  
36  
37  
38  
39  
40  
41  
42  
43  
44  
45  
46  
47

For peer review only

# BMJ Open

## HypoFocal SRT Trial: Ultra-hypo fractionated focal salvage radiotherapy for isolated prostate bed recurrence after radical prostatectomy - Single-arm phase II Study - Clinical Trial Protocol.

|                                 |                                                                                                                                                                                                                                                                                                                                                                                                                                                                                                                                                                                                                                                                                                                                                                                                                                                                                                                                                                          |
|---------------------------------|--------------------------------------------------------------------------------------------------------------------------------------------------------------------------------------------------------------------------------------------------------------------------------------------------------------------------------------------------------------------------------------------------------------------------------------------------------------------------------------------------------------------------------------------------------------------------------------------------------------------------------------------------------------------------------------------------------------------------------------------------------------------------------------------------------------------------------------------------------------------------------------------------------------------------------------------------------------------------|
| Journal:                        | <i>BMJ Open</i>                                                                                                                                                                                                                                                                                                                                                                                                                                                                                                                                                                                                                                                                                                                                                                                                                                                                                                                                                          |
| Manuscript ID                   | bmjopen-2023-075846.R1                                                                                                                                                                                                                                                                                                                                                                                                                                                                                                                                                                                                                                                                                                                                                                                                                                                                                                                                                   |
| Article Type:                   | Protocol                                                                                                                                                                                                                                                                                                                                                                                                                                                                                                                                                                                                                                                                                                                                                                                                                                                                                                                                                                 |
| Date Submitted by the Author:   | 30-Nov-2023                                                                                                                                                                                                                                                                                                                                                                                                                                                                                                                                                                                                                                                                                                                                                                                                                                                                                                                                                              |
| Complete List of Authors:       | Mathier, Etienne; Inselspital University Hospital Bern, Department of Radiation Oncology<br>Althaus, Alexander; Inselspital University Hospital Bern, Department of Radiation Oncology<br>Zwahlen, Daniel; Kantonsspital Winterthur, Department of Radiation Oncology<br>Lustenberger, Jens; University Hospital Basel, Department of Radiation Oncology<br>Zamboglou, Constantinos; German Oncology Center, European University Cyprus, Limassol, Cyprus<br>De Bari, Berardino; Réseau hospitalier neuchâtelois, Department of Radiation Oncology<br>Aebersold, Daniel M.; Inselspital University Hospital Bern, Department of Radiation Oncology<br>Guckenberger, Matthias; University Hospital Zurich,<br>Zilli, Thomas; Oncological Institute of Southern Switzerland, EOC, Bellinzona, Switzerland, Department of Radiation Oncology; Università della Svizzera italiana<br>Shelan, Mohamed; Inselspital University Hospital Bern, Department of Radiation Oncology |
| <b>Primary Subject Heading</b>: | Oncology                                                                                                                                                                                                                                                                                                                                                                                                                                                                                                                                                                                                                                                                                                                                                                                                                                                                                                                                                                 |
| Secondary Subject Heading:      | Oncology                                                                                                                                                                                                                                                                                                                                                                                                                                                                                                                                                                                                                                                                                                                                                                                                                                                                                                                                                                 |
| Keywords:                       | Radiation oncology < RADIOTHERAPY, Prostatic Neoplasms, Urological tumours < ONCOLOGY                                                                                                                                                                                                                                                                                                                                                                                                                                                                                                                                                                                                                                                                                                                                                                                                                                                                                    |
|                                 |                                                                                                                                                                                                                                                                                                                                                                                                                                                                                                                                                                                                                                                                                                                                                                                                                                                                                                                                                                          |

SCHOLARONE™  
Manuscripts



1  
2  
3  
4 1 **HypoFocal SRT Trial: Ultra-hypo fractionated focal salvage radiotherapy**  
5  
6  
7 2 **for isolated prostate bed recurrence after radical prostatectomy -**  
8  
9 3 **Single-arm phase II Study - Clinical Trial Protocol.**

11 4 Etienne Mathier<sup>1#</sup>, Alexander Althaus<sup>1#</sup>, Daniel R. Zwahlen<sup>2</sup>, Jens Lustenberger<sup>3</sup>, Constantinos  
12 5 Zamboglou<sup>4</sup>, Berardino De Bari<sup>5</sup>, Daniel M. Aebersold<sup>1</sup>, Matthias Guckenberger<sup>6</sup>, Thomas Zilli<sup>7\*</sup>,  
13 6 Mohamed Shelan<sup>1\*</sup>

17 7 #Equal contribution as first authors

18 8 \*Equal contribution as last authors

19 9 Affiliations

20 10 <sup>1</sup>Department of Radiation Oncology, Bern University Hospital and University of Bern, Inselspital,  
21 11 Freiburgstrasse 18, 3010 Bern

22 12 <sup>2</sup>Department of Radiation Oncology, Kantonsspital Winterthur, Winterthur, Switzerland

23 13 <sup>3</sup>Department of Radiation Oncology, University Hospital of Basel, Basel, Switzerland

24 14 <sup>4</sup>German Oncology Center, European University Cyprus, Limassol, Cyprus

25 15 <sup>5</sup>Department of Radiation Oncology, Réseau hospitalier neuchâtelois, La Chaux-de-Fonds, Switzerland

26 16 <sup>6</sup>Department of Radiation Oncology, University Hospital Zürich, University of Zurich, Switzerland

27 17 <sup>7</sup>Department of Radiation Oncology, Oncology Institute of Southern Switzerland, EOC, Bellinzona,  
28 18 Switzerland; Facoltà di Scienze Biomediche, Università della Svizzera Italiana, Lugano, Switzerland

29 19 \* Correspondence:

30 20 Mohamed Shelan, MD

31 21 Department of Radiation Oncology, Inselspital, Bern University Hospital, University of Bern, 3010 Bern,  
32 22 Switzerland

33 23 Tel: +41 31 632 26 32

34 24 Email: [mohamed.shelan@insel.ch](mailto:mohamed.shelan@insel.ch)

## 26 ABSTRACT

27 **Introduction:** Despite radical prostatectomy (RP) and radiotherapy (RT) being established treatments for  
28 localized prostate cancer, a significant number of patients experience recurrent disease. While  
29 conventionally fractionated RT is still being used as a standard treatment in the postoperative setting, ultra-  
30 hypofractionated RT has emerged as a viable option with encouraging results in patients with localized  
31 disease in the primary setting. In addition, recent technological advancements in RT delivery and precise  
32 definition of isolated macroscopic recurrence within the prostate bed using Prostate-Specific Membrane  
33 Antigen-Positron Emission Tomography (PSMA-PET) and multiparametric magnetic resonance imaging  
34 (mpMRI) allow the exploration of ultra-hypofractionated schedules in the salvage setting using five  
35 fractions.

36 **Methods and analysis:** In this single-arm prospective phase II multicenter trial, 36 patients with node-  
37 negative prostate adenocarcinoma treated with radical prostatectomy (RP) at least 6 months before trial  
38 registration, tumor stage pT2a-3b, R0-1, pN0, or cN0 according to the UICC TNM 2009 and evidence of  
39 measurable local recurrence within the prostate bed detected by PSMA PET/CT and mpMRI within the last  
40 3 months, will be included. The patients will undergo focal ultra-hypofractionated salvage RT (sRT) with  
41 34 Gy in 5 fractions every other day to the site of local recurrence in combination with 6 months of  
42 Androgen deprivation therapy. The primary outcome of this study is biochemical relapse-free survival at 2  
43 years. Secondary outcomes include acute side effects (until 90 days after the end of RT) of grade 3 or higher  
44 based on Common Terminology Criteria for Adverse Events (CTCAE version 5), progression-free survival,  
45 metastasis-free survival, late side effects, and the quality of life (based on EORTC QLQ-C30, QLQ-PR25).

46 **Ethics and dissemination:** The study has received ethical approval from the Ethics Commission of the  
47 Canton of Bern (KEK-BE 2022-01026). Academic dissemination will occur through publications and  
48 conference presentations.

49 **Trial registration:** ClinicalTrials.gov NCT05746806. Registered on February 28, 2023.

50

1  
2  
3 **51 Strengths and limitations of this study:**  
4

- 5  
6 **52** • Innovative trial evaluating focal SBRT combined with short-term ADT for treating isolated local  
7 **53** recurrence after RP.  
8  
9 **54** • Treatment planning is precisely defined based on PSMA PET imaging and mpMRI.  
10  
11 **55** • Potential for improved efficacy and toxicity profile of salvage radiotherapy.  
12  
13 **56** • Non-randomized trial; further research will be required.  
14 **57** • Small sample size.  
15

16 **58 Study status:** Open for accrual.  
17

18  
19 **59 Funding:** Debiopharm AG and Berger-Janser Stiftung  
20

21  
22 **60 Keywords:** ultra-hypofractionation; SBRT; local recurrence; prostate cancer; salvage radiotherapy.  
23

24 **61**  
25  
26  
27  
28  
29  
30  
31  
32  
33  
34  
35  
36  
37  
38  
39  
40  
41  
42  
43  
44  
45  
46  
47  
48  
49  
50  
51  
52  
53  
54  
55  
56  
57  
58  
59  
60

## 62 BACKGROUND

63 Radical prostatectomy (RP) and radiotherapy (RT) are cornerstones for the treatment of localized prostate  
64 cancer (PC) [1]. However, around 30% to 60% of patients undergoing RP will develop recurrent disease  
65 [2, 3]. Various large randomized controlled studies have shown the effectiveness of postoperative RT in  
66 men who have a high risk of local recurrence following RP, such as pT3 tumor or positive resection margins  
67 [4–8]. In the era of high-sensitivity prostate-specific antigen (PSA) and prostate-specific membrane  
68 antigen-positron emission tomography and computed tomography (PSMA-PET/CT) as a standard staging  
69 examination in recurrent PC, new data suggest comparable oncological results if patients are treated early  
70 with salvage RT (sRT) compared to immediate adjuvant RT [9–12]. Nevertheless, the aforementioned trials  
71 and those involving patients receiving sRT due to macroscopic tumor recurrence in the prostate bed were  
72 conducted with conventionally fractionated RT, typically 2 Gy per fraction [4–12].

73 Recently, ultra-hypofractionated RT, using usually >5 Gy or higher per fraction, was assessed as a valid  
74 therapeutic option in patients with low- or intermediate-risk as a definitive treatment. Published data with  
75 fair follow-up periods demonstrated excellent biochemical control management with a favorable toxicity  
76 profile [13–20]. Moreover, the evidence on ultra-hypofractionated in high-risk individuals is emerging, and  
77 many significant studies have reported favorable findings [21–26]. Ultra-hypofractionation is used to treat  
78 patients with PC due to its low  $\alpha/\beta$  value which is thought to be around 1.5 Gy [27, 28]. It is anticipated  
79 that increasing the dose per fraction would increase the therapeutic ratio and, thus, the potential tumor  
80 control. Nevertheless, considering the low toxicity rates reported [29–37], using moderate  
81 hypofractionation in the postoperative setting with a daily RT dose of up to 3 Gy per fraction does not seem  
82 to corroborate this concern. However, the evidence on postoperative ultra-hypofractionated RT to the  
83 prostate bed is still in its early stages.

84 Further improvement in the oncological outcomes can be expected through technological developments in  
85 RT delivery and precise targeting of the local relapses in the prostate bed. A sRT using an ultra-  
86 hypofractionated schedule delivered in 5 fractions and limited only to the site of isolated macroscopic  
87 recurrence in the prostate bed as defined by PSMA-PET and multiparametric magnetic resonance imaging  
88 (mpMRI) in combination with short-term androgen deprivation therapy for 6 months, may represent a valid  
89 treatment strategy to improve the therapeutic ratio in these patients (shorter overall treatment time, better  
90 sparing of organs at risk while delivering higher biological-equivalent dose into the target volume).

1  
2  
3 91 The main objective of this prospective single-arm trial is to assess the efficacy and safety of ultra-  
4 92 hypofractionated sRT delivered in 5 fractions to the site of local recurrence within the prostate bed with  
5 93 target delineation based on PSMA PET and MRI.  
6  
7

## 8 9 94 **METHODS/DESIGN**

10  
11 95 The Hypo Focal sRT Trial protocol was constructed using the SPIRIT reporting guidelines [29]. Following  
12 96 permission from the regional ethics committees (KEK-BE 2022-01026), the research is registered with  
13 97 ClinicalTrials.gov (NCT05746806) and the Swiss National Clinical Trials Portal. Both the sponsor-  
14 98 investigator and the trial statistician have given their approval to the protocol version 3.0 (dated  
15 99 11.11.2022).  
16  
17  
18  
19

### 20 21 100 **Study Population**

#### 22 23 101 **- Inclusion criteria:**

- 24 102 1. Before registration and before any trial-specific procedures, written informed consent in  
25 103 accordance with ICH/GCP rules is required.
- 26  
27  
28 104 2. Minimum age to register is eighteen years old.
- 29  
30  
31 105 3. Performance level 0-1 according to WHO.
- 32  
33  
34 106 4. Lymph node negative adenocarcinoma of the prostate treated with RP at least 6 months before  
35 107 trial registration. Tumor stage pT2a-3b, R0-1, pN0 or cN0 according to the UICC TNM 2009.
- 36  
37  
38 108 5. Evidence of measurable local recurrence at the prostate bed detected by PSMA PET/CT and  
39 109 mpMRI within the last 3 months. In case of unclear local recurrence, biopsy confirmation is  
40 110 recommended.  
41  
42  
43  
44 111 6. Patient must have non-metastatic (N0, M0) disease, as defined by no evidence of nodal or  
45 112 distant metastases seen on PSMA PET scan.  
46  
47 113  
48 114 7. Patients must have a testosterone level > 50 ng/dL.  
49  
50 115  
51 116 8. Patients must not have had bilateral orchiectomy, LHRH agonists, antiandrogens, or any  
52 117 combination of these in the past.  
53  
54  
55 118

1  
2  
3 119 9. Absence of any psychological, family, sociological, or geographic situation that would make  
4 120 it difficult for the patient to adhere to the research protocol and follow-up plan; the patient should  
5 121 be informed of these factors before registering for the trial.  
6  
7  
8 122

9  
10 123 **- Exclusion criteria:**

- 11  
12 124 1. PSA levels (> 0.4 ng/mL) that persist 4–20 weeks after RP.  
13  
14 125 2. Previous diagnosis of hematologic or primary solid malignancy during the preceding three  
15 126 years previous to registration, except for curatively managed localized non-melanoma skin  
16  
17 127 cancer.  
18 128 3. Use of substances known to alter PSA levels, such as androgen deprivation therapy and any  
19  
20 129 kind of androgen suppression medication, within four weeks of the start of the trial treatment  
21  
22 130 phase.  
23 131 4. Bilateral hip prosthesis.  
24  
25 132 5. Co-morbidities that are severe or active and that are likely to have an effect on whether or not  
26 133 sRT is advisable.  
27  
28 134 6. Treatment with any experimental treatment or involvement in a clinical trial within the last  
29  
30 135 thirty days (with the exception of concurrent participation in the biobank research, which is  
31 136 allowed) is required for eligibility to register.  
32  
33 137

34  
35 138 **Study design and sample size**

36  
37 139 This is a single-arm, prospective, phase II multicenter study. According to the published prospective trials  
38  
39 140 and retrospective series reporting the outcomes of the normo-fractionated sRT, we define biochemical  
40  
41 141 relapse-free survival at 2 years of 60% as poor and of 80% as the promising outcome that would justify  
42  
43 142 further investigation [30–33]. We will therefore test the null hypothesis that the biochemical relapse-free  
44  
45 143 survival at 2 years is lower than 60% against the alternative that it is at least 80%. Based on a one-sample  
46  
47 144 binomial exact test with a one-sided alpha of 5%, 36 patients are required to reach a power of 80%, not  
48  
49 145 taking into account patients lost to follow-up. We will control the safety of the intervention during the trial  
50  
51 146 by assessing acute side effects (grade 3 or higher) at 90 days after 12 and 24 patients. The trial will be  
52  
53 147 stopped if there is evidence that the proportion of patients with acute side effects (grade 3 or higher) is  
54  
55 148 larger than 27%; the proportion observed would be tested using one-sample binomial exact tests with a one-  
56  
57 149 sided alpha of 5%. **Figure 1** shows a summary of the study design and schedule.

## 150 **Outcomes**

### 151 **Primary outcome**

- 152 - Biochemical relapse-free survival at 2 years

### 153 **Secondary outcome**

- 154 - Acute side effects (until 90 days after the end of RT) of grade 3 or higher based on CTCAE v5
- 155 - Progression-free survival
- 156 - Metastasis-free survival
- 157 - Late side effects
- 158 - Quality of life (based on EORTC QLQ-C30, QLQ-PR25)

## 159 **Study Intervention**

### 160 **Pre-registration imaging**

161 Within 3 months prior to registration, PSMA PET/CT is mandatory to exclude regional or distant  
162 metastasis. Both <sup>18</sup>F- and <sup>68</sup>Ga-PSMA tracers are allowed. A mpMRI of the prostate bed is required  
163 within 3 months before registration is mandatory to define the extension of local recurrence.

### 165 **Radiation treatment (SBRT)**

#### 166 **Patient's positioning, immobilization, data acquisition and simulation:**

167 Determining the gross tumor volume (GTV), the planned target volume (PTV), and the essential  
168 structures requires a treatment-planning CT scan with the patient in the same position as during  
169 treatment. The patients will be placed in the supine position for the entire process. Support for the knees  
170 and legs is strongly advised. On a flat table, each patient will be placed in the treatment position while  
171 being immobilized by a unique device. It is advised that patients be treated and scanned while having  
172 a comfortably full bladder. For prostate bed RT, it is advised to have an empty rectum. An example of  
173 a bladder and rectal protocol: An empty rectum is provided by using a rectal enema ± 60 minutes before  
174 planning CT. After emptying the rectum and bladder, the patient is asked to drink the amount of 500-  
175 750 ml of water. The planning CT is then performed after 40 minutes. The patient repeats the bladder  
176 filling procedure during the entire treatment course. An endorectal balloon can be used for repositioning  
177 purposes as per local institutional standards.

178 Radiopaque fiducial markers (mandatory for robotic-based treatments) may be implanted in the prostate  
179 bed one week before the planning CT scan at the discretion of the treating center. During the planning  
180 and performance of the treatment, the patient's location will be reproduced employing skin markings

1  
2  
3 181 and orthogonal laser beams. The pelvis should be scanned during the treatment planning CT scan, at  
4  
5 182 least from the lower portion of the second lumbar vertebra (L2) to the lower half of the ischial  
6  
7 183 tuberosities. The CT scan must cover the full target volume and all organs at risk (OAR). A CT slice  
8  
9 184 should be no thicker than 2 mm. On every CT slice that shows the GTV, PTV, and OAR, these  
10  
11 185 structures must be highlighted. Morphological and topographical information given by clinical  
12  
13 186 examination, mpMRI and PET/CT must be integrated to delineate the target volumes. Rigid or  
14  
15 187 deformable co-registration is allowed.

188

## 189 **Treatment Volumes:**

### 190 **Definition of target volume (refer to Supplementary material 1):**

- 21 191 • **The Gross Tumor Volume of the suspicious local recurrence (GTV)** is defined by the  
22 192 physician as all known gross disease *before any treatment* as defined by the CT/MRI images  
23 193 and PET scan using rigid or deformable fusion and/or clinical information.
- 24 194 • **The Planning Target Volume (PTV)** will provide the GTV a margin to account for daily  
25 195 treatment setup variations and internal motion brought on by breathing or movement during  
26 196 treatment. The PTV should surround the GTV with a 5 mm margin on all sides.

197

### 198 **Organs at risk (OAR):**

199 The delineation of the **OAR** should be done following the RTOG guidelines; the normal pelvis atlas on the  
200 RTOG/NRG Oncology website provides examples of normal tissue contours [34].

201 **The bladder** is defined by its external wall, with a thickness of 5 mm delineated on each slide, from the  
202 dome to the bladder neck and the start of the vesicourethral anastomosis (VUA).

203 **The VUA and distal urethra** are delineated from the bladder neck to the distal urethra using mpMRI  
204 sequences, and a 2-mm isotropic margin is added around these structures to create a planning organ at risk  
205 volume (PRV).

206 **The rectum** is defined by its external wall, with a thickness of 5 mm from the recto-sigmoid junction to  
207 ischial tuberosities.

208 **The femoral heads** are delineated from the top of the hip joint to the small trochanter, while the bowel  
209 bag is delineated from the most inferior small or large bowel loop to 1 cm above the planning target volume  
210 (PTV) for coplanar beam plans, or more if non-coplanar beams or tomotherapy plans are used.



211 It is suggested that dose constraints be adhered to; however, if this is not practicable, the dose per fraction  
 212 or target coverage may be adjusted to comply with the constraint. **Table 1** shows the dose constraints for  
 213 OARs.

214  
 215 **Table 1: Dose constraints for OARs.**

| Organ at risk              | Dose Constraint | Aim     |
|----------------------------|-----------------|---------|
| Rectal Wall                | V18.1 Gy        | < 50%   |
|                            | V29 Gy          | < 20%   |
|                            | V36 Gy          | < 1 cc  |
| Bladder Wall               | V18.1 Gy        | < 40%   |
|                            | V 37 Gy         | < 10 cc |
| PRV_VUA and distal Urethra | V36 Gy          | < 1 cc  |
| Femoral heads              | V14.5 Gy        | < 5%    |
| Penile bulb                | V29.5 Gy        | < 50%   |
| Bowel                      | V18.1 Gy        | < 5 cc  |
|                            | V30 Gy          | < 1 cc  |

216  
 217 **Treatment techniques**

218 It is required to apply rotating techniques or intensity-modulated RT (IMRT). Only dosimetry  
 219 produced by inversed treatment planning is, by definition, regarded as IMRT. Step-and-Shoot,  
 220 Sliding-Window, and Volumetric Modulated Arc therapy (VMAT), as well as MRI-guided  
 221 radiation therapies (MRIdian® or Elekta Unity®), may be employed for performing IMRT.  
 222 Treatment with Cyberknife® is allowed.

223  
 224 **Dose prescription**

225 A total dose of 34 Gy (80% of the maximal dose) will be delivered in 5 fractions and fractions every second  
 226 day (NTD2Gy 80 Gy  $\alpha/\beta=1.5$ Gy for tumor control and 66.6 Gy  $\alpha/\beta=3$ Gy for late toxicity). Treatment will  
 227 be prescribed to the periphery of the target (80% of the dose (=34Gy), should cover 90% of the PTV)  
 228 covering the PTV. A maximal dose of 40 Gy is allowed to GTV. The priority will be given with respect to  
 229 dose constraints over PTV coverage.

230 **Androgen deprivation therapy**

231 For a total of six months, each patient will be treated with a three-monthly formulation of an LHRH-agonist  
 232 or antagonist. Prevention with an antiandrogen is indicated for at least 5 days before the initial injection of  
 233 the agonist in the case of an LHRH-agonist flare and should not be sustained for more than 15 days of the  
 234 first-month duration.

- 235 • Androgen deprivation therapy (ADT) should start no later than the 1st SBRT fraction and no earlier  
 236 than 2 weeks before the start of RT.
- 237 • Palliative ADT should not be initiated for biochemical progression until clinical progression has  
 238 been demonstrated. In the event of symptom progression, palliative ADT is required. In the event  
 239 of asymptomatic clinical progression, men who are well-informed are permitted to delay ADT until  
 240 symptomatic progression occurs (EAU 2023 guidelines) [35]. Generally, we would only begin  
 241 ADT in asymptomatic individuals if traditional imaging confirmed clinical progression. As a result,  
 242 we would not advocate initiating ADT for PET-positive lesions that do not seem suspicious on  
 243 conventional imaging (CT/MRI/bone scintigraphy).
- 244 • ADT-related toxicity should be managed, according to Nguyen et al. [36].

## 245 Study procedures

246 The study procedures and the schedule of assessments are presented in **Table 2**.

247 **Table 2: Schedule of assessments**

| Required investigation         | Inclusion                             |                                      | Treatment | 1 Month after RT | 3 Months after RT                    | 6 Months after RT | Every 6 Months till the end of 2nd year after RT, then once per year till 60 months |
|--------------------------------|---------------------------------------|--------------------------------------|-----------|------------------|--------------------------------------|-------------------|-------------------------------------------------------------------------------------|
|                                | Within 12 weeks prior to registration | Within 2 weeks prior to registration |           |                  | Within 2 weeks prior to registration |                   |                                                                                     |
| Eligibility Check              | x                                     |                                      |           |                  |                                      |                   |                                                                                     |
| Signed informed consent        | x                                     |                                      |           |                  |                                      |                   |                                                                                     |
| Record prior history           | x                                     |                                      |           |                  |                                      |                   |                                                                                     |
| Visits                         |                                       |                                      |           |                  |                                      |                   |                                                                                     |
| Physical Examination           |                                       | x                                    |           | x                | x                                    | x                 | x                                                                                   |
| Biochemistry (Blood Samples) * |                                       |                                      |           |                  |                                      |                   |                                                                                     |
| PSA                            |                                       | x                                    |           | x                | x                                    | x                 | x                                                                                   |

1  
2  
3  
4  
5  
6  
7  
8  
9  
10  
11  
12  
13  
14  
15  
16  
17  
18  
19  
20  
21  
22  
23  
24  
25  
26  
27  
28  
29  
30  
31  
32  
33  
34  
35  
36  
37  
38  
39  
40  
41  
42  
43  
44  
45  
46  
47  
48  
49  
50  
51  
52  
53  
54  
55  
56  
57  
58  
59  
60

|                         |   |   |   |   |   |   |   |
|-------------------------|---|---|---|---|---|---|---|
| Testosterone            |   | x |   | x | x | x | x |
| Radiology               |   |   |   |   |   |   |   |
| PSMA PET                | x |   |   |   |   |   |   |
| MRI                     | x |   |   |   |   |   |   |
| Radiotherapy            |   |   |   |   |   |   |   |
| Treatment planning      |   |   | x |   |   |   |   |
| Record Planning results |   |   | x |   |   |   |   |
| Adverse Events          |   |   |   |   |   |   |   |
| Baseline toxicity       |   | x |   |   |   |   |   |
| Acute toxicity          |   |   | x | x | x |   |   |
| Late toxicity           |   |   |   |   |   | x | x |
| EORTC QoL questionnaire |   |   |   |   |   |   |   |
| QLQ-C30                 |   | x |   | x | x | x | x |
| QLQ-PR25                |   | x |   | x | x | x | x |

## 248 Planned Analysis

249 For descriptive statistics, the categorical variables will be presented as frequency and percentage, the  
 250 normally distributed continuous variables will be presented as mean and standard deviation, and the  
 251 non-normally distributed continuous variables will be presented as median and interquartile range.

252

253 The time-to-event outcomes will be analyzed using Kaplan-Meier-curves, the proportion of responders  
 254 at 1 and 2 years, and the restricted mean survival time at 1 and 2 years with a 95% confidence interval.

255 Binary outcomes will be reported using absolute and relative frequencies with 95% confidence  
 256 intervals.

257

258 The probability of biochemical relapse-free survival and metastasis-free survival will be estimated  
 259 using the Kaplan-Meier method. Cox proportional hazards models will be fit to assess the effects of  
 260 treatment and baseline clinical and pathologic features (such as PSA, PSA doubling time, Gleason score  
 261 etc.) on biochemical relapse-free survival and metastasis-free survival).

## 262 Study status

263 Open and currently accruing since February 20, 2023.

1  
2  
3 264 The approximate recruitment will be completed by October 2024.  
4  
5 265

## 6 266 **Patient and public involvement**

- 8 267 • Patients were not involved in the idea conception of this trial.
- 9 268 • Patients were not involved in the design of this study nor in recruitment of the study.

11 269  
12  
13 270

## 14 271 **Ethics and dissemination**

16 272 The study has been submitted and approved by ethics commission of Canton of Bern. A written informed  
17 273 consent will be obtained from the study participants. Academic dissemination will occur through  
18 274 publication and conference presentations.  
19  
20

21 275

## 23 276 **DISCUSSION**

25 277 External beam RT is a well-established treatment for organ-confined prostate cancer, with comparable  
26 278 cure rates to radical prostatectomy [37]. Hypofractionation employs a higher dose-per-fraction while  
27 279 reducing the number of fractions offering a clinical benefit in terms of tumor control in tumors with a  
28 280 low alpha/beta ratio (e.g. prostate cancer) and favorable toxicity, allowing for higher patient comfort [38].  
29  
30 281 Based on the results of ten prior randomized trials, there is compelling evidence suggesting that  
31 282 moderate hypofractionation RT is not inferior to standard normofractionation RT schedules as a  
32 283 definitive treatment for primary PC[39]. This evidence led to the integration of moderate  
33 284 hypofractionation schedules into the list of valid treatment options in the NCCN guidelines [40]. In  
34 285 addition, recent advancements in the field of RT, including IMRT/rotational techniques, image-guided  
35 286 RT (IGRT), and stereotactic RT (SBRT), have permitted the gradual integration of ultra-  
36 287 hypofractionation in the treatment of localized PC. SBRT for PC has generated adequate data in terms  
37 288 of tumor control, patient-reported quality of life, and minimal toxicity [14, 16, 25] to support its  
38 289 introduction in clinical practice. In addition, the prostate cancer-working group of the German Society  
39 290 of Oncology (DEGRO) and the NCCN Guidelines approve the use of SBRT in the treatment of localized  
40 291 low and intermediate-risk prostate cancer and propose its use in clinical trials for patients with the  
41 292 localized high-risk disease [41, 42].  
42  
43  
44  
45  
46  
47  
48  
49

51 293 The evidence of ultra-hypofractionation has recently been supported by two randomized studies (HYPO  
52 294 RT-PC) [25], PACE-B trial [14]), which compare its usage to conventional fractionation. Nevertheless,  
53 295 only HYPO-RT-PC provided information on the outcomes of long-term tumor and toxicity control. A  
54 296 randomized systematic review and meta-analysis of phase 3 studies evaluating SBRT with normo- and  
55  
56  
57  
58  
59  
60

1  
2  
3 297 hypo-fractionated regimens were published in 2020. It was determined that the ultra-hypofractionated  
4 298 regimens had comparable 5-year disease-free survival outcomes, with late gastrointestinal and  
5 299 genitourinary toxicity of <15% and <21%, respectively, in comparison to hypofractionated regimens and  
6 300 conventional RT [43]. In 2022, the toxicity outcome of the PACE B Trial was published, showing no  
7 301 significant differences between the five fractions of SBRT and conventional RT [44].

11  
12 302 The use of moderate hypofractionation is gaining more popularity as a standard treatment in the  
13 303 postoperative setting [45]. Retrospective and prospective single-arm studies support a safe toxicity profile  
14 304 and promising biochemical control rates with hypofractionation [45]. According to newly released findings  
15 305 from the phase III clinical study NRG-GU003 evaluating hypofractionated postoperative prostate bed RT  
16 306 (HYPORT) to conventional post-prostatectomy RT for men with prostate cancer, treatment with HYPORT  
17 307 did not cause a rise in patient-reported GI or genitourinary (GU) toxicity for study subjects, with a  
18 308 comparable biochemical disease control at the 2-year follow-up [46].

23  
24 309 Prakash et al. [47] did a theoretical feasibility study of SBRT following RP depending on the NTCP (Normal  
25 310 Tissue Complication Probability) model, using individuals who had been managed with conventional  
26 311 EBRT for biochemical recurrence after prostatectomy. The goal was to show that SBRT could be used  
27 312 safely and effectively in this clinical situation. A dose of 30 Gy was delivered to the PTV in five fractions,  
28 313 translating to an equivalent dose in 2 Gy fractions (EQD2) of 64.3 Gy, assuming an  $\alpha/\beta$  value of 1.5 Gy, in  
29 314 accordance with RTOG standards to define postprostatectomy volumes. To predict the probability of late  
30 315 rectal and/or bladder toxicity, the NTCP model was used. According to the NTCP model, the average  
31 316 incidence of grade  $\geq 2$  late rectal toxicity was assessed to be 0.28%, and that of late grade 2 toxicity on the  
32 317 bladder neck was determined to be as low as 0.00013%, while the average incidence of late urinary  
33 318 symptoms exacerbation was calculated to be 4.81 %. The author's conclusion is that employing SBRT after  
34 319 surgery looks viable and may provide a safe, practical therapeutic alternative for individuals in both the  
35 320 adjuvant and salvage following biochemical failure, taking into account the limitations of the NTCP model.

36  
37  
38  
39  
40  
41  
42  
43  
44 321 Sampath et al. examined the use of stereotactic dose-escalated RT on prostate beds in a prospective phase  
45 322 I research, which revealed a crude rate of biochemical control of 42% in the overall population [48].  
46 323 Patients received care using dose fractionation regimens of 35 Gy, 40 Gy, and 45 Gy in five fractions each.  
47 324 The authors emphasized that raising the dosage to 45 Gy was possible without increasing the number of  
48 325 adverse events but that there was no observed improvement in PSA control when compared to 40 Gy in 5  
49 326 fractions. Similarly, a recent propensity score study comparing salvage SBRT and conventional RT for  
50 327 macroscopic prostate bed recurrence revealed similar bRFS and PFS rates across the two modalities. On  
51 328 the other hand, a reduced incidence of toxicity was verified for patients receiving focal stereotactic sRT

329 compared to conventionally fractionated sRT, with acute GI and GU adverse events recorded in 4.4%  
 330 against 44.4% ( $p < 0.001$ ) and 28.9% against 46.7% ( $p = 0.08$ ) of participants, and late GI and GU side  
 331 effects reported in 0% versus 13.3% ( $p = 0.04$ ) and 6.7% versus 22.2% ( $p = 0.03$ ) of patient populations,  
 332 respectively [49]. The authors argue that salvage SBRT is a desirable substitute for conventional sRT in  
 333 this situation due to the approach's favorable therapeutic ratio and the less number of required fractions.  
 334 Additionally, the prospective phase 2 SCIMITAR trial reported the quality of life and toxicity outcome of  
 335 100 patients who received postoperative ultra-hypofractionated SBRT delivered in 5 fractions [50]. Acute  
 336 and late grade 2 GU toxicities were both 9%, while acute and late grade 2 GI toxicities were 5% and 0%,  
 337 respectively. Three patients had grade 3 toxicity ( $n = 1$  GU,  $n = 2$  GI) [50].

338 The expected results from the Hypo-Focal sRT trial will provide the first prospective evidence for the focal  
 339 hypofractionated RT in the salvage setting and can be used as a basis for a large multicenter phase 3 trial.  
 340 In addition to the assumed improvement in efficacy and toxicity profile due to precise customization of the  
 341 treatment target volumes, the application of a focal hypofractionated RT is expected to achieve cost-  
 342 effectiveness benefits. Due to the very short treatment course (unlike conventional RT treatments, which  
 343 can take up to 7 weeks), hypofractionated focal sRT leads to greater patient convenience and comfortability.

#### 344 **Abbreviations:**

|          |                                                                                                        |
|----------|--------------------------------------------------------------------------------------------------------|
| AE       | Adverse Event                                                                                          |
| ADC      | Apparent diffusion coefficient                                                                         |
| ADT      | Androgen deprivation therapy                                                                           |
| ASR/DSUR | Annual Safety Report / Development Safety Report                                                       |
| ASTRO    | American Society for Radiation Oncology                                                                |
| ASCO/AUA | American Society of Clinical Oncology/ American Urological Association                                 |
| ASTRO    | American Society for Therapeutic Radiology and Oncology                                                |
| BASEC    | Business Administration System for Ethical Committees                                                  |
| bRFS     | Biochemical relapse-free survival                                                                      |
| CA       | Clinical approval                                                                                      |
| CBCT     | Cone Beam CT                                                                                           |
| CEC      | Clinical ethics committee                                                                              |
| ClinO    | Ordinance on Clinical Trials in Human Research (in German: KlinV, in French: OClin, in Italian: OSRUm) |
| CRF      | Case Report Form                                                                                       |
| CTCAE    | Common Terminology Criteria for Adverse Events                                                         |

|    |                            |                                                                                    |
|----|----------------------------|------------------------------------------------------------------------------------|
| 1  |                            |                                                                                    |
| 2  |                            |                                                                                    |
| 3  |                            |                                                                                    |
| 4  | CTU                        | Clinical trials unit                                                               |
| 5  | CTV                        | Clinical target volume                                                             |
| 6  |                            |                                                                                    |
| 7  | DCE                        | Dynamic contrast enhancement                                                       |
| 8  |                            |                                                                                    |
| 9  | DEGRO                      | German Society of radiation oncology                                               |
| 10 |                            |                                                                                    |
| 11 | DFS                        | Disease free survival                                                              |
| 12 | DRE                        | Digital rectal examination                                                         |
| 13 |                            |                                                                                    |
| 14 | DVH                        | Dose-volume histogram                                                              |
| 15 | DWI                        | Diffusion-weighted imaging                                                         |
| 16 |                            |                                                                                    |
| 17 | EAU                        | European Association of Urology                                                    |
| 18 | EORTC                      | European Organisation for Research and Treatment of Cancer                         |
| 19 |                            |                                                                                    |
| 20 | <sup>18</sup> F            | Fluorine-18                                                                        |
| 21 | FADP                       | Federal Act on Data Protection (in German: DSGVO, in French: LPD, in Italian: LPD) |
| 22 |                            |                                                                                    |
| 23 | FOPH                       | Federal Office of Public Health                                                    |
| 24 |                            |                                                                                    |
| 25 | <sup>18</sup> F-<br>DCFPYL | Pylarify - piflufolastat Fluorine-18                                               |
| 26 |                            |                                                                                    |
| 27 | eCRF                       | Electronic Case Report Form                                                        |
| 28 |                            |                                                                                    |
| 29 | <sup>68</sup> Ga           | Gallium-68                                                                         |
| 30 | GCP                        | Good Clinical Practice                                                             |
| 31 |                            |                                                                                    |
| 32 | GTV                        | Gross tumor volume                                                                 |
| 33 |                            |                                                                                    |
| 34 | GI                         | Gastrointestinal                                                                   |
| 35 |                            |                                                                                    |
| 36 | GU                         | Genitourinary                                                                      |
| 37 | HR                         | Hazard ratio                                                                       |
| 38 |                            |                                                                                    |
| 39 | HRA                        | Human Research Act (in German: HFG, in French: LRH, in Italian: LRUm)              |
| 40 |                            |                                                                                    |
| 41 | ICH                        | International Conference on Harmonisation                                          |
| 42 | IGRT                       | Image-guided radiotherapy                                                          |
| 43 |                            |                                                                                    |
| 44 | IMRT                       | Intensity-modulated radiotherapy                                                   |
| 45 | LHRH                       | Luteinizing hormone-releasing hormone                                              |
| 46 |                            |                                                                                    |
| 47 | LHRHa                      | Luteinizing hormone-releasing hormone agonist                                      |
| 48 |                            |                                                                                    |
| 49 | MFS                        | Metastasis free survival                                                           |
| 50 | mpMRI                      | Multiparametric magnetic resonance imaging                                         |
| 51 |                            |                                                                                    |
| 52 | MRI                        | Magnetic resonance imaging                                                         |
| 53 |                            |                                                                                    |
| 54 | NCI                        | National cancer institute                                                          |
| 55 |                            |                                                                                    |
| 56 | NTCP                       | Normal tissue complication probability                                             |
| 57 |                            |                                                                                    |
| 58 |                            |                                                                                    |
| 59 |                            |                                                                                    |
| 60 |                            |                                                                                    |

|    |        |                                         |
|----|--------|-----------------------------------------|
| 1  |        |                                         |
| 2  |        |                                         |
| 3  |        |                                         |
| 4  | NTD    | Normalized total dose                   |
| 5  | NCCN   | National comprehensive cancer network   |
| 6  |        |                                         |
| 7  | OAR    | Organs at risk                          |
| 8  |        |                                         |
| 9  | OS     | Overall survival                        |
| 10 | OSEM   | Ordered subset expectation maximization |
| 11 |        |                                         |
| 12 | PET/CT | Positron electron computed tomography   |
| 13 |        |                                         |
| 14 | PFS    | Progression-free survival               |
| 15 | PI     | Principal Investigator                  |
| 16 |        |                                         |
| 17 | PRV    | Planning organ at risk volume           |
| 18 | PSA    | Prostate-specific antigen               |
| 19 |        |                                         |
| 20 | PSF    | Point-spread-function                   |
| 21 |        |                                         |
| 22 | PSMA   | Prostate-specific membrane antigen      |
| 23 | PTV    | Planning target volume                  |
| 24 |        |                                         |
| 25 | RP     | Radical prostatectomy                   |
| 26 | RT     | Radiotherapy                            |
| 27 |        |                                         |
| 28 | RTOG   | Radiation therapy oncology group        |
| 29 |        |                                         |
| 30 | SAE    | Serious Adverse Event                   |
| 31 | SBRT   | Stereotactic body radiotherapy          |
| 32 |        |                                         |
| 33 | SI     | Signal intensity                        |
| 34 |        |                                         |
| 35 | sRT    | Salvage radiotherapy                    |
| 36 | TLC    | Thin layer chromatography               |
| 37 |        |                                         |
| 38 | TMF    | Trial master file                       |
| 39 |        |                                         |
| 40 | TNM    | Tumor Nodes Metastases                  |
| 41 | TOF    | Time of flight                          |
| 42 |        |                                         |
| 43 | UICC   | Union internationale contre le cancer   |
| 44 | UPN    | Unique Patient Number                   |
| 45 |        |                                         |
| 46 | VUA    | Vesicourethral anastomosis              |
| 47 |        |                                         |
| 48 | WHO    | World health organization               |
| 49 | QLQ    | Quality of life questionnaire           |
| 50 |        |                                         |
| 51 | QoL    | Quality of life                         |
| 52 |        |                                         |

345



1  
2  
3 346 **Acknowledgment:** None.  
4

5  
6 347 **Authors' contributions:** EM, AA, DRZ, JL, CZ, BDB, DMA, and TZ contributed to the conception and  
7 348 design of the protocol, statistical design and initial drafting of the protocol. MS is the principal  
8  
9 349 investigator. All authors contributed to the quality, conception, design of the protocol, and establishment  
10 350 of study specific documents.  
11

12  
13 351 **Funding:** This work was funded by a grant from the Berger-Janser Stiftung (Grant Number 13/2021) and  
14 352 Debiopharm AG (Grant Number not applicable).  
15

16  
17 353 **Ethical approval, protocol registration, and consent to participate:** The study received a permission  
18 354 from the regional ethics committees (KEK-BE 2022-01026), the research is registered with  
19 355 ClinicalTrials.gov (NCT05746806) and the Swiss National Clinical Trials Portal. Written, informed  
20 356 consent to participate is and will be obtained from all participants before participating in the trial.  
21  
22  
23

24 357 **Patient Consent for publication:** obtained.  
25

26  
27 358 **Competing interests statement:** None declared.  
28  
29

30 359  
31

32 360  
33  
34  
35  
36  
37  
38  
39  
40  
41  
42  
43  
44  
45  
46  
47  
48  
49  
50  
51  
52  
53  
54  
55  
56  
57  
58  
59  
60

361 **REFERENCES**

- 362
- 363 1. Hamdy FC, Donovan JL, Lane JA, Mason M, Metcalfe C, Holding P, et al. 10-Year Outcomes  
364 after Monitoring, Surgery, or Radiotherapy for Localized Prostate Cancer. *N Engl J Med*.  
365 2016;375:1415–24.
- 366 2. Gandaglia G, Briganti A, Clarke N, Karnes RJ, Graefen M, Ost P, et al. Adjuvant and Salvage  
367 Radiotherapy after Radical Prostatectomy in Prostate Cancer Patients. *Eur Urol*. 2017;72:689–  
368 709.
- 369 3. Han M, Partin AW, Zahurak M, Piantadosi S, Epstein JI, Walsh PC. Biochemical (prostate  
370 specific antigen) recurrence probability following radical prostatectomy for clinically localized  
371 prostate cancer. *J Urol*. 2003;169:517–23.
- 372 4. Bolla M, van Poppel H, Collette L, van Cangh P, Vekemans K, Da Pozzo L, et al.  
373 Postoperative radiotherapy after radical prostatectomy: a randomised controlled trial (EORTC  
374 trial 22911). *Lancet*. 2005;366:572–8.
- 375 5. Bolla M, van Poppel H, Tombal B, Vekemans K, Da Pozzo L, de Reijke TM, et al.  
376 Postoperative radiotherapy after radical prostatectomy for high-risk prostate cancer: long-term  
377 results of a randomised controlled trial (EORTC trial 22911). *Lancet*. 2012;380:2018–27.
- 378 6. Thompson IM, Tangen CM, Paradelo J, Lucia MS, Miller G, Troyer D, et al. Adjuvant  
379 radiotherapy for pathologically advanced prostate cancer: a randomized clinical trial. *JAMA*.  
380 2006;296:2329–35.
- 381 7. Thompson IM, Tangen CM, Paradelo J, Lucia MS, Miller G, Troyer D, et al. Adjuvant  
382 radiotherapy for pathological T3N0M0 prostate cancer significantly reduces risk of metastases  
383 and improves survival: long-term follow-up of a randomized clinical trial. *J Urol*. 2009;181:956–  
384 62.
- 385 8. Wiegel T, Bottke D, Steiner U, Siegmann A, Golz R, Störkel S, et al. Phase III postoperative  
386 adjuvant radiotherapy after radical prostatectomy compared with radical prostatectomy alone in  
387 pT3 prostate cancer with postoperative undetectable prostate-specific antigen: ARO 96-02/AUO  
388 AP 09/95. *J Clin Oncol*. 2009;27:2924–30.
- 389 9. Kneebone A, Fraser-Browne C, Duchesne GM, Fisher R, Frydenberg M, Herschtal A, et al.  
390 Adjuvant radiotherapy versus early salvage radiotherapy following radical prostatectomy (TROG  
391 08.03/ANZUP RAVES): a randomised, controlled, phase 3, non-inferiority trial. *Lancet Oncol*.  
392 2020;21:1331–40.
- 393 10. Parker CC, Clarke NW, Cook AD, Kynaston HG, Petersen PM, Catton C, et al. Timing of  
394 radiotherapy after radical prostatectomy (RADICALS-RT): a randomised, controlled phase 3  
395 trial. *Lancet*. 2020;396:1413–21.
- 396 11. Vale CL, Fisher D, Kneebone A, Parker C, Pearse M, Richaud P, et al. Adjuvant or early  
397 salvage radiotherapy for the treatment of localised and locally advanced prostate cancer: a  
398 prospectively planned systematic review and meta-analysis of aggregate data. *Lancet*.  
399 2020;396:1422–31.
- 400 12. Sargos P, Chabaud S, Latorzeff I, Magné N, Benyoucef A, Supiot S, et al. Adjuvant

- 1  
2  
3 401 radiotherapy versus early salvage radiotherapy plus short-term androgen deprivation therapy in  
4 402 men with localised prostate cancer after radical prostatectomy (GETUG-AFU 17): a randomised,  
5 403 phase 3 trial. *Lancet Oncol.* 2020;21:1341–52.
- 7 404 13. Boike TP, Lotan Y, Cho LC, Brindle J, DeRose P, Xie X-J, et al. Phase I dose-escalation  
8 405 study of stereotactic body radiation therapy for low- and intermediate-risk prostate cancer. *J Clin*  
9 406 *Oncol.* 2011;29:2020–6.
- 11 407 14. Brand DH, Tree AC, Ostler P, van der Voet H, Loblaw A, Chu W, et al. Intensity-modulated  
12 408 fractionated radiotherapy versus stereotactic body radiotherapy for prostate cancer (PACE-B):  
13 409 acute toxicity findings from an international, randomised, open-label, phase 3, non-inferiority  
14 410 trial. *Lancet Oncol.* 2019;20:1531–43.
- 16 411 15. Chen LN, Suy S, Uhm S, Oermann EK, Ju AW, Chen V, et al. Stereotactic body radiation  
17 412 therapy (SBRT) for clinically localized prostate cancer: the Georgetown University experience.  
18 413 *Radiat Oncol.* 2013;8:58.
- 20 414 16. Jackson WC, Silva J, Hartman HE, Dess RT, Kishan AU, Beeler WH, et al. Stereotactic  
21 415 Body Radiation Therapy for Localized Prostate Cancer: A Systematic Review and Meta-  
22 416 Analysis of Over 6,000 Patients Treated On Prospective Studies. *Int J Radiat Oncol Biol Phys.*  
23 417 2019;104:778–89.
- 26 418 17. King CR, Brooks JD, Gill H, Presti JC. Long-term outcomes from a prospective trial of  
27 419 stereotactic body radiotherapy for low-risk prostate cancer. *Int J Radiat Oncol Biol Phys.*  
28 420 2012;82:877–82.
- 30 421 18. Kotecha R, Djemil T, Tendulkar RD, Reddy CA, Thousand RA, Vassil A, et al. Dose-  
31 422 Escalated Stereotactic Body Radiation Therapy for Patients With Intermediate- and High-Risk  
32 423 Prostate Cancer: Initial Dosimetry Analysis and Patient Outcomes. *Int J Radiat Oncol Biol Phys.*  
33 424 2016;95:960–4.
- 35 425 19. Meier RM, Bloch DA, Cotrutz C, Beckman AC, Henning GT, Woodhouse SA, et al.  
36 426 Multicenter Trial of Stereotactic Body Radiation Therapy for Low- and Intermediate-Risk  
37 427 Prostate Cancer: Survival and Toxicity Endpoints. *Int J Radiat Oncol Biol Phys.* 2018;102:296–  
38 428 303.
- 40 429 20. Zilli T, Franzese C, Bottero M, Giaj-Levra N, Förster R, Zwahlen D, et al. Single fraction  
41 430 urethra-sparing prostate cancer SBRT: Phase I results of the ONE SHOT trial. *Radiother Oncol.*  
42 431 2019;139:83–6.
- 44 432 21. Bauman G, Ferguson M, Lock M, Chen J, Ahmad B, Venkatesan VM, et al. A Phase 1/2  
45 433 Trial of Brief Androgen Suppression and Stereotactic Radiation Therapy (FASTR) for High-Risk  
46 434 Prostate Cancer. *Int J Radiat Oncol Biol Phys.* 2015;92:856–62.
- 48 435 22. Callan L, Bauman G, Chen J, Lock M, Sexton T, D'Souza D, et al. A Phase I/II Trial of Fairly  
49 436 Brief Androgen Suppression and Stereotactic Radiation Therapy for High-Risk Prostate Cancer  
50 437 (FASTR-2): Preliminary Results and Toxicity Analysis. *Adv Radiat Oncol.* 2019;4:668–73.
- 52 438 23. Foerster R, Zwahlen DR, Buchali A, Tang H, Schroeder C, Windisch P, et al. Stereotactic  
53 439 Body Radiotherapy for High-Risk Prostate Cancer: A Systematic Review. *Cancers (Basel).*  
54 440 2021;13.

- 1  
2  
3 441 24. Murthy V, Gupta M, Mulye G, Maulik S, Munshi M, Krishnatry R, et al. Early Results of  
4 442 Extreme Hypofractionation Using Stereotactic Body Radiation Therapy for High-risk, Very High-  
5 443 risk and Node-positive Prostate Cancer. *Clin Oncol (R Coll Radiol)*. 2018;30:442–7.
- 7 444 25. Widmark A, Gunnlaugsson A, Beckman L, Thellenberg-Karlsson C, Hoyer M, Lagerlund M,  
8 445 et al. Ultra-hypofractionated versus conventionally fractionated radiotherapy for prostate cancer:  
9 446 5-year outcomes of the HYPO-RT-PC randomised, non-inferiority, phase 3 trial. *Lancet*.  
11 447 2019;394:385–95.
- 12 448 26. Zilli T, Jorcano S, Bral S, Rubio C, Bruynzeel AME, Oliveira A, et al. Once-a-week or every-  
13 449 other-day urethra-sparing prostate cancer stereotactic body radiotherapy, a randomized phase  
14 450 II trial: 18 months follow-up results. *Cancer Med*. 2020;9:3097–106.
- 16 451 27. Brenner DJ, Martinez AA, Edmundson GK, Mitchell C, Thames HD, Armour EP. Direct  
17 452 evidence that prostate tumors show high sensitivity to fractionation (low  $\alpha/\beta$  ratio), similar to  
18 453 late-responding normal tissue. *International Journal of Radiation Oncology\*Biophysics\*Physics*.  
20 454 2002;52:6–13.
- 22 455 28. Miralbell R, Roberts SA, Zubizarreta E, Hendry JH. Dose-fractionation sensitivity of prostate  
23 456 cancer deduced from radiotherapy outcomes of 5,969 patients in seven international institutional  
24 457 datasets:  $\alpha/\beta = 1.4$  (0.9-2.2) Gy. *Int J Radiat Oncol Biol Phys*. 2012;82:e17-24.
- 26 458 29. Chan A-W, Tetzlaff JM, Altman DG, Laupacis A, Gøtzsche PC, Krleža-Jerić K, et al. SPIRIT  
27 459 2013 statement: defining standard protocol items for clinical trials. *Ann Intern Med*.  
28 460 2013;158:200–7.
- 30 461 30. Shelan M, Odermatt S, Bojaxhiu B, Nguyen DP, Thalmann GN, Aebbersold DM, et al.  
31 462 Disease control with delayed salvage radiotherapy for macroscopic local recurrence following  
32 463 radical prostatectomy. *Front Oncol*. 2019;9:12.
- 34 464 31. Ghadjjar P, Hayoz S, Bernhard J, Zwahlen DR, Hölscher T, Gut P, et al. Dose-intensified  
35 465 Versus Conventional-dose Salvage Radiotherapy for Biochemically Recurrent Prostate Cancer  
36 466 After Prostatectomy: The SAKK 09/10 Randomized Phase 3 Trial. *Eur Urol*. 2021;80:306–15.
- 38 467 32. Zilli T, Jorcano S, Peguret N, Caparrotti F, Hidalgo A, Khan HG, et al. Results of Dose-  
39 468 adapted Salvage Radiotherapy After Radical Prostatectomy Based on an Endorectal MRI  
40 469 Target Definition Model. *Am J Clin Oncol*. 2017;40:194–9.
- 42 470 33. Benziane-Ouaritini N, Zilli T, Giraud A, Ingrosso G, Di Staso M, Trippa F, et al.  
43 471 Prostatectomy Bed Image-guided Dose-escalated Salvage Radiotherapy (SPIDER): An  
44 472 International Multicenter Retrospective Study. *Eur Urol Oncol*. 2023.
- 46 473 34. NRG > About Us > Center for Innovation in Radiation Oncology > Male RTOG Normal  
47 474 Pelvis. [https://www.nrgoncology.org/About-Us/Center-for-Innovation-in-Radiation-](https://www.nrgoncology.org/About-Us/Center-for-Innovation-in-Radiation-Oncology/Male-RTOG-Normal-Pelvis)  
48 475 [Oncology/Male-RTOG-Normal-Pelvis](https://www.nrgoncology.org/About-Us/Center-for-Innovation-in-Radiation-Oncology/Male-RTOG-Normal-Pelvis). Accessed 19 Mar 2023.
- 50 476 35. 2023 Summaries and Changes of the Prostate Cancer guideline - Uroweb.  
51 477 <https://uroweb.org/guidelines/prostate-cancer/summary-of-changes>. Accessed 13 Apr 2023.
- 53 478 36. Nguyen PL, Alibhai SMH, Basaria S, D'Amico AV, Kantoff PW, Keating NL, et al. Adverse  
54 479 effects of androgen deprivation therapy and strategies to mitigate them. *Eur Urol*. 2015;67:825–  
55 480 36.

- 1  
2  
3 481 37. Hamdy FC, Donovan JL, Lane JA, Metcalfe C, Davis M, Turner EL, et al. Fifteen-Year  
4 482 Outcomes after Monitoring, Surgery, or Radiotherapy for Prostate Cancer. *N Engl J Med*. 2023.  
5  
6 483 38. Fowler JF. The radiobiology of prostate cancer including new aspects of fractionated  
7 484 radiotherapy. *Acta Oncol*. 2005;44:265–76.  
8  
9 485 39. Hickey BE, James ML, Daly T, Soh F-Y, Jeffery M. Hypofractionation for clinically localized  
10 486 prostate cancer. *Cochrane Database Syst Rev*. 2019;9:CD011462.  
11  
12 487 40. NCCN Guidelines. <https://www.nccn.org/guidelines/nccn-guidelines>. Accessed 13 Apr 2023.  
13  
14 488 41. Wolf F, Sedlmayer F, Aebbersold D, Albrecht C, Böhmer D, Flentje M, et al.  
15 489 Ultrahypofractionation of localized prostate cancer: Statement from the DEGRO working group  
16 490 prostate cancer. *Strahlenther Onkol*. 2021;197:89–96.  
17  
18 491 42. Zerini D, Jereczek-Fossa BA, Fodor C, Bazzani F, Maucieri A, Ronchi S, et al. Salvage  
19 492 image-guided intensity modulated or stereotactic body reirradiation of local recurrence of  
20 493 prostate cancer. *Br J Radiol*. 2015;88:20150197.  
21  
22 494 43. Scher N, Bauduceau O, Bollet M, Lamallem H, Charas T, Garaud P, et al. Stereotactic  
23 495 prostate focal reirradiation therapy for local recurrence: preliminary results of Hartmann  
24 496 Oncology Radiotherapy Group. *BJR Open*. 2019;1:20180027.  
25  
26 497 44. Tree AC, Ostler P, van der Voet H, Chu W, Loblaw A, Ford D, et al. Intensity-modulated  
27 498 radiotherapy versus stereotactic body radiotherapy for prostate cancer (PACE-B): 2-year toxicity  
28 499 results from an open-label, randomised, phase 3, non-inferiority trial. *Lancet Oncol*.  
29 500 2022;23:1308–20.  
30  
31 501 45. Picardi C, Perret I, Miralbell R, Zilli T. Hypofractionated radiotherapy for prostate cancer in  
32 502 the postoperative setting: What is the evidence so far? *Cancer Treat Rev*. 2018;62:91–6.  
33  
34 503 46. Tandberg DJ, Oyekunle T, Lee WR, Wu Y, Salama JK, Koontz BF. Postoperative radiation  
35 504 therapy for prostate cancer: comparison of conventional versus hypofractionated radiation  
36 505 regimens. *Int J Radiat Oncol Biol Phys*. 2018;101:396–405.  
37  
38 506 47. Parikh NR, Kishan AU, Kane N, Diaz-Perez S, Ganapathy E, Nazarian R, et al. Phase 1  
39 507 Trial of Stereotactic Body Radiation Therapy Neoadjuvant to Radical Prostatectomy for Patients  
40 508 With High-Risk Prostate Cancer. *Int J Radiat Oncol Biol Phys*. 2020;108:930–5.  
41  
42 509 48. Sampath S, Frankel P, Vecchio BD, Ruel N, Yuh B, Liu A, et al. Stereotactic Body Radiation  
43 510 Therapy to the Prostate Bed: Results of a Phase 1 Dose-Escalation Trial. *Int J Radiat Oncol Biol*  
44 511 *Phys*. 2020;106:537–45.  
45  
46 512 49. Francolini G, Jereczek-Fossa BA, Di Cataldo V, Simontacchi G, Marvaso G, Gandini S, et  
47 513 al. Stereotactic or conventional radiotherapy for macroscopic prostate bed recurrence: a  
48 514 propensity score analysis. *Radiol Med*. 2022;127:449–57.  
49  
50 515 50. Ma TM, Ballas LK, Wilhalme H, Sachdeva A, Chong N, Sharma S, et al. Quality-of-Life  
51 516 Outcomes and Toxicity Profile Among Patients With Localized Prostate Cancer After Radical  
52 517 Prostatectomy Treated With Stereotactic Body Radiation: The SCIMITAR Multicenter Phase 2  
53 518 Trial. *Int J Radiat Oncol Biol Phys*. 2023;115:142–52.  
54  
55 519

1  
2  
3 **520 Figure legends:**

4 **521 Figure 1:** Summary of the study design and schedule.  
5  
6  
7  
8  
9  
10  
11  
12  
13  
14  
15  
16  
17  
18  
19  
20  
21  
22  
23  
24  
25  
26  
27  
28  
29  
30  
31  
32  
33  
34  
35  
36  
37  
38  
39  
40  
41  
42  
43  
44  
45  
46  
47  
48  
49  
50  
51  
52  
53  
54  
55  
56  
57  
58  
59  
60

For peer review only

1  
2  
3  
4  
5  
6  
7  
8  
9  
10  
11  
12  
13  
14  
15  
16  
17  
18  
19  
20  
21  
22  
23  
24  
25  
26  
27  
28  
29  
30  
31  
32  
33  
34  
35  
36  
37  
38  
39  
40  
41  
42  
43  
44  
45  
46  
47  
48  
49  
50  
51  
52  
53  
54  
55  
56  
57  
58  
59  
60



Figure 1: Summary of the study design and schedule.

159x65mm (300 x 300 DPI)



# A single arm phase II trial of ultrahypofractionated focal salvage radiotherapy for isolated prostate bed recurrence after radical prostatectomy

## (HypoFocal SRT Trial)

Study Type: Other Clinical Trial according to ClinO, Chapter 4

Risk Categorisation: Risk category A according to ClinO, Art. 61

Study Registration: Clinicaltrials.gov: **XXXX**  
 Cantonal Ethics Committee Number: KEK-BE 2202-01026

Sponsor-Investigator: Mohamed Shelan, MD  
 Department of Radiation Oncology, Inselspital,  
 Bern University Hospital and University of Bern, Bern,  
 Switzerland.  
 Phone: +41 31 632 24 31  
 Fax: +41 31 632 85 67  
 E-mail: mohamed.shelan@insel.ch

Investigated Intervention: treating isolated prostate bed macroscopic recurrence after radical prostatectomy using ultrahypofractionated radiotherapy.

Protocol ID  
 Version and Date: Version 3.0 (11/11/2022)

### Change history

| Version Nr | Version date | Modified without version change | Description, comments                        | Control |
|------------|--------------|---------------------------------|----------------------------------------------|---------|
| 1.0        | 30.05.2022   |                                 | Initial version                              |         |
| 2.0        | 11.09.2022   | no                              | Amended upon request of the ethics committee | MS      |
| 3.0        | 11.11.2022   | no                              | Amended upon request of the ethics committee | MS      |



---

## CONFIDENTIALITY STATEMENT

The information contained in this document is confidential and the property of the sponsor investigator. The information may not - in full or in part - be transmitted, reproduced, published, or disclosed to others than the applicable competent ethics committees and regulatory authorities without prior written authorization from the sponsor except to the extent necessary to obtain informed consent from those who will participate in the study.

## PROTOCOL SIGNATURE FORM

**Study Title**      A single arm phase II trial of ultrahypofractionated focal salvage radiotherapy for isolated prostate bed recurrence after radical prostatectomy

The Sponsor-Investigator has approved the protocol version 3.0 (11/11/2022) and confirm hereby to conduct the study according to the protocol, current version of the World Medical Association Declaration of Helsinki, and ICH-GCP guidelines as well as the local legally applicable requirements.

### Sponsor Investigator:

Name: Dr. med. Mohamed Shelan

Date: \_\_\_\_\_

Signature: \_\_\_\_\_

**PROTOCOL SIGNATURE FORM FOR LOCAL INVESTIGATOR:**

The local Investigator has approved the protocol version 3.0 (11/11/2022) and confirm hereby to conduct the study according to the protocol, current version of the World Medical Association Declaration of Helsinki, and ICH-GCP guidelines as well as the local legally applicable requirements

**Local Principal Investigator at study site:**

Site:

Principal Investigator:

Date: \_\_\_\_\_ Signature: \_\_\_\_\_

For peer review only

## TABLE OF CONTENTS

|    |                                                                                 |                                           |
|----|---------------------------------------------------------------------------------|-------------------------------------------|
| 1  |                                                                                 |                                           |
| 2  |                                                                                 |                                           |
| 3  |                                                                                 |                                           |
| 4  |                                                                                 |                                           |
| 5  | TABLE OF CONTENTS                                                               | 3                                         |
| 6  | GLOSSARY OF ABBREVIATIONS                                                       | 4                                         |
| 7  | 1 STUDY SYNOPSIS                                                                | 6                                         |
| 8  | 2 BACKGROUND AND RATIONALE                                                      | 11                                        |
| 9  | 3 STUDY OBJECTIVES AND DESIGN                                                   | 15                                        |
| 10 | 3.1 Hypothesis and primary objective                                            | 15                                        |
| 11 | 3.2 Primary and secondary endpoints                                             | 16                                        |
| 12 | 3.3 Study design                                                                | 16                                        |
| 13 | 3.4. Study intervention                                                         | 16                                        |
| 14 | 3.4.1 Pre-registration imaging                                                  | 16                                        |
| 15 | 3.4.2 Radiation treatment (SBRT)                                                | 16                                        |
| 16 | 3.4.3 Androgen deprivation therapy                                              | 18                                        |
| 17 | 4 STUDY POPULATION AND STUDY PROCEDURES                                         | 19                                        |
| 18 | 4.1 Inclusion and exclusion criteria, justification of study population         | 19                                        |
| 19 | Schedule of assessments                                                         | 20                                        |
| 20 | 4.4 Withdrawal and discontinuation                                              | 21                                        |
| 21 | 5 STATISTICS AND METHODOLOGY                                                    | 21                                        |
| 22 | 5.1. Statistical analysis plan and sample size calculation                      | 21                                        |
| 23 | 5.2. Definition of endpoints                                                    | 22                                        |
| 24 | 5.3. Handling of missing data and drop-outs                                     | 23                                        |
| 25 | 6 Regulatory Aspects AND SAFETY                                                 | 23                                        |
| 26 | 6.1 Local regulations / Declaration of Helsinki                                 | 23                                        |
| 27 | 6.2 (Serious) Adverse Events and notification of safety and protective measures | 24                                        |
| 28 | 6.3 (Periodic) safety reporting                                                 | 25                                        |
| 29 | 6.4 Radiation                                                                   | 25                                        |
| 30 | 6.5 Pregnancy                                                                   | 25                                        |
| 31 | 6.6 Amendments                                                                  | 25                                        |
| 32 | 6.7 (Premature) termination of study                                            | 26                                        |
| 33 | 6.8 Insurance                                                                   | 26                                        |
| 34 | 7 FURTHER ASPECTS                                                               | <b>FEHLER! TEXTMARKE NICHT DEFINIERT.</b> |
| 35 | 7.1 Overall ethical considerations                                              | 26                                        |
| 36 | 7.1.1 Patient protection                                                        | 27                                        |
| 37 | 7.1.2 Subject identification                                                    | 27                                        |
| 38 | 7.1.3 Informed consent                                                          | 27                                        |
| 39 | 7.2 Risk-benefit assessment                                                     | 27                                        |
| 40 | 8 QUALITY CONTROL AND DATA PROTECTION                                           | 27                                        |
| 41 | 8.1 Quality measures                                                            | 27                                        |
| 42 | 8.2 Data recording and source data                                              | 28                                        |
| 43 | 8.3 Confidentiality and coding                                                  | 28                                        |
| 44 | 8.4 Retention and destruction of study data                                     | 28                                        |
| 45 | 9 MONITORING AND REGISTRATION                                                   | 29                                        |
| 46 | 10. FUNDING / PUBLICATION / DECLARATION OF INTEREST                             | 29                                        |
| 47 | 11 REFERENCES                                                                   | 29                                        |
| 48 |                                                                                 |                                           |
| 49 |                                                                                 |                                           |
| 50 |                                                                                 |                                           |
| 51 |                                                                                 |                                           |
| 52 |                                                                                 |                                           |
| 53 |                                                                                 |                                           |
| 54 |                                                                                 |                                           |
| 55 |                                                                                 |                                           |
| 56 |                                                                                 |                                           |
| 57 |                                                                                 |                                           |
| 58 |                                                                                 |                                           |
| 59 |                                                                                 |                                           |
| 60 |                                                                                 |                                           |

## GLOSSARY OF ABBREVIATIONS

|                         |                                                                                                               |
|-------------------------|---------------------------------------------------------------------------------------------------------------|
| AE                      | <i>Adverse Event</i>                                                                                          |
| ADC                     | <i>Apparent diffusion coefficient</i>                                                                         |
| ADT                     | <i>Androgen deprivation therapy</i>                                                                           |
| ASR/DSUR                | <i>Annual Safety Report / Development Safety Report</i>                                                       |
| ASTRO/<br>ASCO/AUA      | <i>American societies of radiation oncology, medical oncology and urology</i>                                 |
| BASEC                   | <i>Business Administration System for Ethical Committees</i>                                                  |
| bRFS                    | <i>Biochemical relapse free survival</i>                                                                      |
| CA                      | <i>Clinical approval</i>                                                                                      |
| CBCT                    | <i>Cone Beam CT</i>                                                                                           |
| CEC                     | <i>Clinical ethics committee</i>                                                                              |
| ClinO                   | <i>Ordinance on Clinical Trials in Human Research (in German: KlinV, in French: OClin, in Italian: OSRUm)</i> |
| CRF                     | <i>Case Report Form</i>                                                                                       |
| CTCAE                   | <i>Common Terminology Criteria for Adverse Events</i>                                                         |
| CTU                     | <i>Clinical trials unit</i>                                                                                   |
| CTV                     | <i>Clinical target volume</i>                                                                                 |
| DCE                     | <i>Dynamic contrast enhancement</i>                                                                           |
| DEGRO                   | <i>German society of radiation oncology</i>                                                                   |
| DFS                     | <i>Disease free survival</i>                                                                                  |
| DRE                     | <i>Digital rectal examination</i>                                                                             |
| DVH                     | <i>Dose volume histogram</i>                                                                                  |
| DWI                     | <i>Diffusion-weighted imaging</i>                                                                             |
| EAU                     | <i>European association of urology</i>                                                                        |
| EORTC                   | <i>European organisation for research and treatment of cancer</i>                                             |
| <sup>18</sup> F         | <i>Fluorine-18</i>                                                                                            |
| FADP                    | <i>Federal Act on Data Protection (in German: DSG, in French: LPD, in Italian: LPD)</i>                       |
| FOPH                    | <i>Federal Office of Public Health</i>                                                                        |
| <sup>18</sup> F- DCFPYL | <i>Pylarify - piflufolastat Fluorine-18</i>                                                                   |
| eCRF                    | <i>Electronic Case Report Form</i>                                                                            |
| <sup>68</sup> Ga        | <i>Gallium-68</i>                                                                                             |
| GCP                     | <i>Good Clinical Practice</i>                                                                                 |
| GTV                     | <i>Gross tumor volume</i>                                                                                     |
| GI                      | <i>Gastrointestinal</i>                                                                                       |
| GU                      | <i>Genitourinary</i>                                                                                          |
| HR                      | <i>Hazard ratio</i>                                                                                           |
| HRA                     | <i>Human Research Act (in German: HFG, in French: LRH, in Italian: LRUm)</i>                                  |
| ICH                     | <i>International Conference on Harmonisation</i>                                                              |
| IGRT                    | <i>Image guided radiotherapy</i>                                                                              |
| IMRT                    | <i>Intensity modulated radiotherapy</i>                                                                       |

1  
2  
3  
4  
5  
6  
7  
8  
9  
10  
11  
12  
13  
14  
15  
16  
17  
18  
19  
20  
21  
22  
23  
24  
25  
26  
27  
28  
29  
30  
31  
32  
33  
34  
35  
36  
37  
38  
39  
40  
41  
42  
43  
44  
45  
46  
47  
48  
49  
50  
51  
52  
53  
54  
55  
56  
57  
58  
59  
60

|               |                                                      |
|---------------|------------------------------------------------------|
| <i>LHRH</i>   | <i>Luteinizing hormone releasing hormone</i>         |
| <i>LHRHa</i>  | <i>Luteinizing hormone releasing hormone agonist</i> |
| <i>MFS</i>    | <i>Metastasis free survival</i>                      |
| <i>mpMRI</i>  | <i>Multiparametric magnetic resonance imaging</i>    |
| <i>MRI</i>    | <i>Magnetic resonance imaging</i>                    |
| <i>NCI</i>    | <i>National cancer institute</i>                     |
| <i>NTCP</i>   | <i>Normal tissue complication probability</i>        |
| <i>NTD</i>    | <i>Normalized total dose</i>                         |
| <i>NCCN</i>   | <i>National comprehensive cancer network</i>         |
| <i>OAR</i>    | <i>Organs at risk</i>                                |
| <i>OS</i>     | <i>Overall survival</i>                              |
| <i>OSEM</i>   | <i>Ordered subset expectation maximization</i>       |
| <i>PET/CT</i> | <i>Positron electron computed tomography</i>         |
| <i>PFS</i>    | <i>Progression-free survival</i>                     |
| <i>PI</i>     | <i>Principal Investigator</i>                        |
| <i>PRV</i>    | <i>Planning organ at risk volume</i>                 |
| <i>PSA</i>    | <i>Prostate specific antigen</i>                     |
| <i>PSF</i>    | <i>Point-spread-function</i>                         |
| <i>PSMA</i>   | <i>Prostate-specific membrane antigen</i>            |
| <i>PTV</i>    | <i>Planning target volume</i>                        |
| <i>RP</i>     | <i>Radical prostatectomy</i>                         |
| <i>RT</i>     | <i>Radiotherapy</i>                                  |
| <i>RTOG</i>   | <i>Radiation therapy oncology group</i>              |
| <i>SAE</i>    | <i>Serious Adverse Event</i>                         |
| <i>SBRT</i>   | <i>Stereotactic body radiotherapy</i>                |
| <i>SI</i>     | <i>Signal intensity</i>                              |
| <i>SRT</i>    | <i>Salvage radiotherapy</i>                          |
| <i>TLC</i>    | <i>Thin layer chromatography</i>                     |
| <i>TMF</i>    | <i>Trial master file</i>                             |
| <i>TNM</i>    | <i>Tumor Nodes Metastases</i>                        |
| <i>TOF</i>    | <i>Time of flight</i>                                |
| <i>UICC</i>   | <i>Union internationale contre le cancer</i>         |
| <i>UPN</i>    | <i>Unique Patient Number</i>                         |
| <i>VUA</i>    | <i>Vesicourethral anastomosis</i>                    |
| <i>WHO</i>    | <i>World health organization</i>                     |
| <i>QLQ</i>    | <i>Quality of life questionnaire</i>                 |
| <i>QoL</i>    | <i>Quality of life</i>                               |

## 1 STUDY SYNOPSIS

|                                       |                                                                                                                                                                                                                                                                                                                                                                                                                                                                                                                                                                                                                                                                                                                                                                                                                                                                                                                                                                                                                                                                                                                                                                                                                                                                                                                                                                                                                                                                                                                                                                                                                                                                                                                                                                                                                                                                                                                                                                                                                                                                                                                                                                                               |
|---------------------------------------|-----------------------------------------------------------------------------------------------------------------------------------------------------------------------------------------------------------------------------------------------------------------------------------------------------------------------------------------------------------------------------------------------------------------------------------------------------------------------------------------------------------------------------------------------------------------------------------------------------------------------------------------------------------------------------------------------------------------------------------------------------------------------------------------------------------------------------------------------------------------------------------------------------------------------------------------------------------------------------------------------------------------------------------------------------------------------------------------------------------------------------------------------------------------------------------------------------------------------------------------------------------------------------------------------------------------------------------------------------------------------------------------------------------------------------------------------------------------------------------------------------------------------------------------------------------------------------------------------------------------------------------------------------------------------------------------------------------------------------------------------------------------------------------------------------------------------------------------------------------------------------------------------------------------------------------------------------------------------------------------------------------------------------------------------------------------------------------------------------------------------------------------------------------------------------------------------|
| <b>Sponsor / Sponsor-Investigator</b> | Mohamed Shelan, MD                                                                                                                                                                                                                                                                                                                                                                                                                                                                                                                                                                                                                                                                                                                                                                                                                                                                                                                                                                                                                                                                                                                                                                                                                                                                                                                                                                                                                                                                                                                                                                                                                                                                                                                                                                                                                                                                                                                                                                                                                                                                                                                                                                            |
| <b>Study Title:</b>                   | A single arm phase II trial of ultrahypofractionated focal salvage radiotherapy for isolated prostate bed recurrence after radical prostatectomy                                                                                                                                                                                                                                                                                                                                                                                                                                                                                                                                                                                                                                                                                                                                                                                                                                                                                                                                                                                                                                                                                                                                                                                                                                                                                                                                                                                                                                                                                                                                                                                                                                                                                                                                                                                                                                                                                                                                                                                                                                              |
| <b>Short Title / Study ID:</b>        | HypoFocal-SRT                                                                                                                                                                                                                                                                                                                                                                                                                                                                                                                                                                                                                                                                                                                                                                                                                                                                                                                                                                                                                                                                                                                                                                                                                                                                                                                                                                                                                                                                                                                                                                                                                                                                                                                                                                                                                                                                                                                                                                                                                                                                                                                                                                                 |
| <b>Protocol Version and Date:</b>     | Ver. 3.0 date 11.11.2022                                                                                                                                                                                                                                                                                                                                                                                                                                                                                                                                                                                                                                                                                                                                                                                                                                                                                                                                                                                                                                                                                                                                                                                                                                                                                                                                                                                                                                                                                                                                                                                                                                                                                                                                                                                                                                                                                                                                                                                                                                                                                                                                                                      |
| <b>Trial registration:</b>            | <a href="http://www.clinicaltrials.gov">www.clinicaltrials.gov</a> . Registration will be completed after the Ethic committee approval                                                                                                                                                                                                                                                                                                                                                                                                                                                                                                                                                                                                                                                                                                                                                                                                                                                                                                                                                                                                                                                                                                                                                                                                                                                                                                                                                                                                                                                                                                                                                                                                                                                                                                                                                                                                                                                                                                                                                                                                                                                        |
| <b>Study category and Rationale</b>   | <p>Category A</p> <p>Ultrahypofractionated radiotherapy is not a standard of care in patients with local recurrence after radical prostatectomy. However, based on published data from retrospective series and phase I trial using a similar or higher fractionation scheme to the one used in this trial, toxicity is not expected to be higher than in case of normofractionated salvage radiotherapy. In terms of tumor control outcome, a benefit of hypofractionation can be expected due to the low <math>\alpha/\beta</math> value of prostate cancer.</p>                                                                                                                                                                                                                                                                                                                                                                                                                                                                                                                                                                                                                                                                                                                                                                                                                                                                                                                                                                                                                                                                                                                                                                                                                                                                                                                                                                                                                                                                                                                                                                                                                            |
| <b>Clinical Phase:</b>                | Phase II                                                                                                                                                                                                                                                                                                                                                                                                                                                                                                                                                                                                                                                                                                                                                                                                                                                                                                                                                                                                                                                                                                                                                                                                                                                                                                                                                                                                                                                                                                                                                                                                                                                                                                                                                                                                                                                                                                                                                                                                                                                                                                                                                                                      |
| <b>Background and Rationale:</b>      | <p>Radical prostatectomy and radiotherapy (RT) are the considered as backbones for treating localized disease<sup>1</sup>. However radical prostatectomy, 30 – 60% of patients will develop recurrent disease<sup>2,3</sup>. Several large randomized controlled trials have shown a benefit of postoperative radiation therapy in patients with a high risk of local recurrence after RPE, e.g. pT3 disease or positive resection margins<sup>4-8</sup>. In the era of high sensitivity PSA and PSMA-PET/CT, there has been additional evidence suggesting a similar oncological outcome if patients are treated with early salvage radiotherapy in case of a rising PSA after RPE instead of immediate adjuvant radiotherapy<sup>9-12</sup>. However, the above mentioned studies as well as the studies including patients receiving salvage radiotherapy in case of a macroscopic tumor recurrence in the prostate bed were done with conventionally fractionated radiotherapy, usually in 2 Gy per fraction<sup>4-12</sup>.</p> <p>In the setting of definite radiotherapy to the prostate, ultrahypofractionated radiotherapy has been used as a treatment option in patients with low or intermediate risk for a long time and there are published data with a reasonable follow up that shows excellent biochemical control with low high grade toxicity rates<sup>13-20</sup>. In addition, data on ultrahypofractionated in high-risk patients are emerging with several large trials being published with encouraging results<sup>21-26</sup>. The rationale for using ultrahypofractionated in patients treated for prostate cancer is the estimated low <math>\alpha/\beta</math> value of around 1.5 Gy<sup>27,28</sup>. Therefore, using a larger fraction dose is expected to improve the therapeutic ratio and consequently the probability of tumor control.</p> <p>Although Data on moderate hypofractionation in the setting of postoperative radiotherapy with a fraction dose of up to 3 Gy per fraction does not seem to support this concern, given the low toxicity rates that were reported in several analyses<sup>29-38</sup>. However, data on postoperative</p> |

|                                 |                                                                                                                                                                                                                                                                                                                                                                                                                                                                                                                                                                                                                                                                                                                                                                                                                                                                                                                                                                                                                                                                                                                                                                                                                                                                                                                                                                                                                                                                                                                                                                                                                                                                                                                                                                                                                                                                                                                                       |
|---------------------------------|---------------------------------------------------------------------------------------------------------------------------------------------------------------------------------------------------------------------------------------------------------------------------------------------------------------------------------------------------------------------------------------------------------------------------------------------------------------------------------------------------------------------------------------------------------------------------------------------------------------------------------------------------------------------------------------------------------------------------------------------------------------------------------------------------------------------------------------------------------------------------------------------------------------------------------------------------------------------------------------------------------------------------------------------------------------------------------------------------------------------------------------------------------------------------------------------------------------------------------------------------------------------------------------------------------------------------------------------------------------------------------------------------------------------------------------------------------------------------------------------------------------------------------------------------------------------------------------------------------------------------------------------------------------------------------------------------------------------------------------------------------------------------------------------------------------------------------------------------------------------------------------------------------------------------------------|
|                                 | <p>ultrahypofractionated radiotherapy to the prostate bed remains immature. The rates of acute and late toxicities following ultrahypofractionated radiotherapy to the prostate bed were reported in retrospective and phase I studies are within the above mentioned ranges. The rate of acute <math>\geq</math> G2 GI and GU toxicities range from 0 – 50 % and 0 – 33.3 % and for late <math>\geq</math> G2 GI and GU toxicities from 0 – 11.5 % and 0 – 38.5 %<sup>39–48</sup>. This data suggests that SBRT to the prostate bed can be applied with toxicity rates similar to that of normofractionated or mildly hypofractionated radiotherapy</p> <p>Further improvement in the oncological outcomes can be expected through technological developments in radiotherapy delivery and precise targeting of the local relapses in the prostate bed. A SRT using a ultrahypofractionated schedule delivered precisely in 5 fractions and limited only to the site of isolated macroscopic recurrence in the prostate bed as defined by PSMA-PET and multiparametric MRI (mpMRI) may represent a valid treatment strategy to improve the therapeutic ratio in these patients (short overall treatment time, better sparing of surrounding healthy tissues, increased dose to the target volume).</p> <p><b>Rationale for combining ADT to SRT</b></p> <ul style="list-style-type: none"> <li>- The benefit of ADT to salvage radiation has been demonstrated in two randomized phase III trials, RTOG 9601 and GETUG 16, which provided evidence of improved metastasis-free and overall survival and durable biochemical disease control with bicalutamide for 24 mo and ADT using LHRH agonists for 6 months, respectively.</li> <li>- These studies support the current National Comprehensive Cancer Network (NCCN) guidelines to consider combination of 6–24 months of hormonal therapy with SRT in this setting.</li> </ul> |
| Objective(s):                   | The main objective of the trial is to explore the efficacy and safety of combining short-term ADT over 6 months to focal ultrahypofractionated SRT delivered in 5 fractions to the site of local recurrence within the prostate bed after radical prostatectomy where mpMRI and PSMA PET/CT are used to precisely identify the local recurrence and compare it to previously published literature.                                                                                                                                                                                                                                                                                                                                                                                                                                                                                                                                                                                                                                                                                                                                                                                                                                                                                                                                                                                                                                                                                                                                                                                                                                                                                                                                                                                                                                                                                                                                    |
| Outcome(s):                     | <p>Primary endpoints:</p> <ul style="list-style-type: none"> <li>- Biochemical relapsefree survival at 2 years</li> </ul> <p>Secondary endpoints:</p> <ul style="list-style-type: none"> <li>- Acute side effects (till 90 days after end of radiation) of grade 3 or higher based on CTCAE v5</li> <li>- Clinical progression-free survival</li> <li>- Metastasis-free survival</li> <li>- Late side effects</li> <li>- Quality of life (based on EORTC QLQ-C30, QLQ-PR25)</li> </ul>                                                                                                                                                                                                                                                                                                                                                                                                                                                                                                                                                                                                                                                                                                                                                                                                                                                                                                                                                                                                                                                                                                                                                                                                                                                                                                                                                                                                                                                |
| Study design:                   | This a single arm, prospective, phase II multicenter study                                                                                                                                                                                                                                                                                                                                                                                                                                                                                                                                                                                                                                                                                                                                                                                                                                                                                                                                                                                                                                                                                                                                                                                                                                                                                                                                                                                                                                                                                                                                                                                                                                                                                                                                                                                                                                                                            |
| Inclusion / Exclusion criteria: | <p><b>Inclusion criteria:</b></p> <ol style="list-style-type: none"> <li>1. Written informed consent according to ICH/GCP regulations before registration and prior to any trial specific procedures</li> <li>2. Age <math>\geq</math> 18 years at time of registration</li> <li>3. WHO performance status 0-1</li> <li>4. Lymph node negative adenocarcinoma of the prostate treated with radical prostatectomy (RP) at least 6 months before trial</li> </ol>                                                                                                                                                                                                                                                                                                                                                                                                                                                                                                                                                                                                                                                                                                                                                                                                                                                                                                                                                                                                                                                                                                                                                                                                                                                                                                                                                                                                                                                                       |



1  
2  
3  
4  
5  
6  
7  
8  
9  
10  
11  
12  
13  
14  
15  
16  
17  
18  
19  
20  
21  
22  
23  
24  
25  
26  
27  
28  
29  
30  
31  
32  
33  
34  
35  
36  
37  
38  
39  
40  
41  
42  
43  
44  
45  
46  
47  
48  
49  
50  
51  
52  
53  
54  
55  
56  
57  
58  
59  
60

|                                            |                                                                                                                                                                                                                                                                                                                                                                                                                                                                                                                                                                                                                                                                                                                                                                                                                                                                                                                                                                                                                                                                                                                                                                                                                                                                                                                                                                                                                                                                                                                                                                                                                                                                                                                                                                                                                                                                                               |
|--------------------------------------------|-----------------------------------------------------------------------------------------------------------------------------------------------------------------------------------------------------------------------------------------------------------------------------------------------------------------------------------------------------------------------------------------------------------------------------------------------------------------------------------------------------------------------------------------------------------------------------------------------------------------------------------------------------------------------------------------------------------------------------------------------------------------------------------------------------------------------------------------------------------------------------------------------------------------------------------------------------------------------------------------------------------------------------------------------------------------------------------------------------------------------------------------------------------------------------------------------------------------------------------------------------------------------------------------------------------------------------------------------------------------------------------------------------------------------------------------------------------------------------------------------------------------------------------------------------------------------------------------------------------------------------------------------------------------------------------------------------------------------------------------------------------------------------------------------------------------------------------------------------------------------------------------------|
|                                            | <p>registration. Tumor stage pT2a-3b, R0-1, pN0 or cN0 according to the UICC TNM 2009.</p> <ol style="list-style-type: none"> <li>5. Evidence of measurable local recurrence at the prostate bed detected by PSMA PET/CT and mpMRI within the last 3 months. In case of unclear local recurrence, a biopsy confirmation is recommended.</li> <li>6. Patient must have non-metastatic (N0, M0) disease, as defined by a lack of nodal or distant metastases seen on PSMA PET/CT scan</li> <li>7. Patients must have non-castrate levels of serum testosterone (<math>\geq 50</math> ng/dL).</li> <li>8. Patients must not have previously received hormonal therapy (LHRH agonists, antiandrogen, or both, or bilateral orchiectomy).</li> <li>9. Absence of any psychological, familial, sociological or geographical condition potentially hampering compliance with the study protocol and follow-up schedule; those conditions should be discussed with the patient before registration in the trial</li> </ol> <p><b>Exclusion criteria:</b></p> <ol style="list-style-type: none"> <li>1. Persistent PSA (<math>&gt; 0.4</math> ng/mL) 4 to 20 weeks after RP</li> <li>2. Previous hematologic or primary solid malignancy within 3 years prior registration with the exception of curatively treated localized non-melanoma skin cancer</li> <li>3. Usage of products known to affect PSA levels within 4 weeks prior to start of trial treatment phase including any form of androgen suppression agents and androgen deprivation therapy</li> <li>4. Bilateral hip prosthesis</li> <li>5. Severe or active co-morbidity likely to impact on the advisability of SRT</li> <li>6. Treatment with any experimental drug or participation within a clinical trial within 30 days prior to registration (exception: concurrent participation in the biobank studies is allowed)</li> </ol> |
| <p><b>Measurements and procedures:</b></p> | <p><b>Investigations to be performed within 12 weeks prior to registration:</b></p> <ul style="list-style-type: none"> <li>- Physical examinations including Digital rectal examination (DRE)</li> <li>- Multi-parametric MRI</li> <li>- PSMA PET/CT.</li> </ul> <p><b>Investigations during trial treatment phase</b></p> <ul style="list-style-type: none"> <li>- Planning CT</li> <li>- Multi-parametric MRI if not yet performed</li> <li>- Serum PSA</li> <li>- Total testosterone,</li> <li>- Assessment of recurrences in case of suspected progression</li> </ul> <p><b>During follow-up:</b></p> <ul style="list-style-type: none"> <li>- Physical examinations</li> <li>- Digital rectal examination (if suspected clinical progression),</li> <li>- serum PSA</li> <li>- Total testosterone</li> <li>- Assessment of recurrences with PSMA PET/CT imaging (local, regional, distant)</li> </ul> <p><b>All adverse events are collected throughout the trial.</b></p>                                                                                                                                                                                                                                                                                                                                                                                                                                                                                                                                                                                                                                                                                                                                                                                                                                                                                                               |



|                                               |                                                                                                                                                                                                                                                                                                                                                                                                                                                                                                                                                                                                                                                                                                                                                                                                                                                                                                                                                                                                                                                                                                                                                                                                                                                                                                                                                                                                                                                                                                                                                                                                                                                                                              |
|-----------------------------------------------|----------------------------------------------------------------------------------------------------------------------------------------------------------------------------------------------------------------------------------------------------------------------------------------------------------------------------------------------------------------------------------------------------------------------------------------------------------------------------------------------------------------------------------------------------------------------------------------------------------------------------------------------------------------------------------------------------------------------------------------------------------------------------------------------------------------------------------------------------------------------------------------------------------------------------------------------------------------------------------------------------------------------------------------------------------------------------------------------------------------------------------------------------------------------------------------------------------------------------------------------------------------------------------------------------------------------------------------------------------------------------------------------------------------------------------------------------------------------------------------------------------------------------------------------------------------------------------------------------------------------------------------------------------------------------------------------|
| <b>Control Intervention (if applicable):</b>  | This is a single arm study. Control intervention is not applicable.                                                                                                                                                                                                                                                                                                                                                                                                                                                                                                                                                                                                                                                                                                                                                                                                                                                                                                                                                                                                                                                                                                                                                                                                                                                                                                                                                                                                                                                                                                                                                                                                                          |
| <b>Number of Participants with Rationale:</b> | It is planned to enrol a total of 36 patients in the trial (see statistical considerations for rationale).                                                                                                                                                                                                                                                                                                                                                                                                                                                                                                                                                                                                                                                                                                                                                                                                                                                                                                                                                                                                                                                                                                                                                                                                                                                                                                                                                                                                                                                                                                                                                                                   |
| <b>Study Duration:</b>                        | Expected accrual time: 18 Months                                                                                                                                                                                                                                                                                                                                                                                                                                                                                                                                                                                                                                                                                                                                                                                                                                                                                                                                                                                                                                                                                                                                                                                                                                                                                                                                                                                                                                                                                                                                                                                                                                                             |
| <b>Study Schedule:</b>                        | First-Participant-In: Q4 2022<br>Last-Participant-Out: Q4 2027                                                                                                                                                                                                                                                                                                                                                                                                                                                                                                                                                                                                                                                                                                                                                                                                                                                                                                                                                                                                                                                                                                                                                                                                                                                                                                                                                                                                                                                                                                                                                                                                                               |
| <b>Investigator(s):</b>                       | <p><b>Dr. med. Mohamed Shelan</b><br/>Department of Radiation Oncology<br/>Inselspital, Bern University Hospital<br/>Bern, Switzerland.<br/>Phone: 031 632 29 70<br/>E-Mail: <a href="mailto:mohamed.shelan@insel.ch">mohamed.shelan@insel.ch</a></p> <p><b>Prof. Dr. med. Daniel M. Aebbersold</b><br/>Department of Radiation Oncology<br/>Inselspital, Bern University Hospital<br/>Bern, Switzerland.<br/>Phone: 031 632 24 31<br/>E-Mail: <a href="mailto:daniel.aebbersold@insel.ch">daniel.aebbersold@insel.ch</a></p> <p><b>Jens Lustenberger</b><br/>Department of Radiation Oncology<br/>Unispital Basel<br/>E-Mail: <a href="mailto:jens.lustenberger@usb.ch">jens.lustenberger@usb.ch</a></p> <p><b>Prof. Dr. Daniel R. Zwahlen</b><br/>Department of Radiation Oncology<br/>Kantonsspital Winterthur<br/>Phone: 079 553 25 63<br/>E-Mail: <a href="mailto:daniel.zwahlen@ksw.ch">daniel.zwahlen@ksw.ch</a></p> <p><b>Prof. Dr. med. Thomas Zilli</b><br/>Clinica di Radio-Oncologia<br/>Istituto Oncologico della Svizzera Italiana-Ente Ospedaliero Cantonale (IOSI-EOC)<br/>Phone: 091/811 96 35<br/>E-Mail: <a href="mailto:Thomas.Zilli@eoc.ch">Thomas.Zilli@eoc.ch</a></p> <p><b>Dr. med. Alexander Althaus</b><br/>Department of Radiation Oncology<br/>Inselspital, Bern University Hospital<br/>Bern, Switzerland.<br/>Phone: 031 632 29 70<br/>Email: <a href="mailto:alexander.althaus@insel.ch">alexander.althaus@insel.ch</a></p> <p><b>Dr. med. Hendrik Gabriel Rathke</b><br/>Department of Nuclear Medicine<br/>Inselspital, Bern University Hospital<br/>Bern, Switzerland.<br/>Email: <a href="mailto:hendrik.rathke@insel.ch">hendrik.rathke@insel.ch</a></p> |
| <b>Study Centre(s):</b>                       | Multi-centre study. At least 4 recruiting centers in Switzerland.                                                                                                                                                                                                                                                                                                                                                                                                                                                                                                                                                                                                                                                                                                                                                                                                                                                                                                                                                                                                                                                                                                                                                                                                                                                                                                                                                                                                                                                                                                                                                                                                                            |
| <b>Statistical Considerations:</b>            | According to the published prospective trials and retrospective series reporting the outcome of the normofractionated SRT, we define                                                                                                                                                                                                                                                                                                                                                                                                                                                                                                                                                                                                                                                                                                                                                                                                                                                                                                                                                                                                                                                                                                                                                                                                                                                                                                                                                                                                                                                                                                                                                         |

|                       |                                                                                                                                                                                                                                                                                                                                                                                                                                                                                                                                                                                                                                                                                                                                                                                                                                                                                                                                                                                                                                                                                                                                                                                                                                                                                             |
|-----------------------|---------------------------------------------------------------------------------------------------------------------------------------------------------------------------------------------------------------------------------------------------------------------------------------------------------------------------------------------------------------------------------------------------------------------------------------------------------------------------------------------------------------------------------------------------------------------------------------------------------------------------------------------------------------------------------------------------------------------------------------------------------------------------------------------------------------------------------------------------------------------------------------------------------------------------------------------------------------------------------------------------------------------------------------------------------------------------------------------------------------------------------------------------------------------------------------------------------------------------------------------------------------------------------------------|
|                       | <p>biochemical relapse free survival at 2 years of 60% as poor and of 80% as promising outcome that would justify further investigation. We will therefore test the null hypothesis that the biochemical relapse free survival at 2 years is lower than 60% against the alternative that it is at least 80%. Based on a one-sample binomial exact test with a one-sided alpha of 5%, 36 patients are required to reach a power of 80%. The null hypothesis will be rejected if at least 27 patients show biochemical relapse free survival at 2 years.</p> <p>We will control the safety of the intervention during the trial by assessing acute side effects (grade 3 or higher) at 90 days after 12 and 24 patients. The trial will be stopped if there is evidence that the proportion of patients with acute side effects is larger than 27%, the proportion observed that will be tested using one-sample binomial exact tests with a one-sided alpha of 5%.</p> <p>Time-to-event outcomes will be analyzed using Kaplan-Meier-curves, the proportion of responders at 1 and 2 years, and the restricted mean survival time at 1 and 2 years with 95% confidence interval. Binary outcomes will be reported using absolute and relative frequencies with 95% confidence intervals.</p> |
| <b>GCP Statement:</b> | <p>This study will be conducted in compliance with the protocol, the current version of the Declaration of Helsinki, the ICH-GCP or ISO EN 14155 (as far as applicable) as well as all national legal and regulatory requirements.</p>                                                                                                                                                                                                                                                                                                                                                                                                                                                                                                                                                                                                                                                                                                                                                                                                                                                                                                                                                                                                                                                      |

## 2 BACKGROUND AND RATIONALE

### 2.1 Disease background

Prostate cancer is the most common non-cutaneous malignancy in men. An estimated 1.1 million patients per year worldwide were diagnosed with prostate cancer, accounting for 15% of the cancers diagnosed in men, with almost 70% of the cases occurring in more developed regions. Prostate cancer is the fifth leading cause of cancer death in men, representing 6.6% of the total male cancer mortality<sup>49</sup>.

The most common curative therapeutic modalities for localized prostate cancers include radical prostatectomy (RP) and radiotherapy with or without androgen deprivation therapy. Although there is a wide variability between treatment site and risk groups, approximately 50% of all men with localized prostate cancer undergo RP<sup>50</sup>. After RP, between 30-60% of men can develop a biochemical relapse within 5 years<sup>51-54</sup>. The site of relapse in prostate cancer patients after RP is predominantly local, with a low incidence of distant failures<sup>55</sup>. Within patients with biochemical relapse the actuarial rate of bone metastasis is 37% and 65% at 5 years and 10 years, respectively. The median time to development of bone metastasis after biochemical relapse is 8 years and the median time between development of bone metastasis and death is 5 years<sup>56</sup>.

### 2.2 Therapy background

#### 2.2.1 The use of adjuvant and salvage radiotherapy after radical prostatectomy

Adverse pathological factors after prostatectomy, such as positive surgical margins, extracapsular extension, or seminal vesicle invasion, increase the likelihood of disease recurrence. Three randomized clinical trials have demonstrated the benefits of adjuvant radiotherapy after RP for patients with adverse pathological features<sup>5,8,57</sup>. The most consistent findings were an improvement in biochemical relapse free survival across all three trials and improvements in loco-regional and clinical relapse free survival in the two trials that reported these outcomes. Although there was an improvement in overall survival in one of the studies<sup>57</sup>, the use of adjuvant radiotherapy is not unanimously accepted<sup>58</sup>. Two of these studies have included patients with a detectable prostate-specific antigen (PSA) at the time of adjuvant treatment; therefore, these patients received salvage treatment by definition. As such, many clinicians offer salvage radiotherapy (SRT) to patients with biochemical progression instead of adjuvant radiotherapy. The main advantage of salvage versus adjuvant radiotherapy is the avoidance of a potential overtreatment in cases that would never relapse after surgery, even in the presence of high-risk pathological features<sup>59</sup>. Recently, prospective randomized trials, systematic review, and meta-analysis suggest that adjuvant radiotherapy does not improve event-free survival in men with localized or locally advanced prostate cancer. Until data on long-term outcomes are available, early salvage treatment would seem the preferable treatment policy as it offers the opportunity to spare many men radiotherapy and its associated side-effects<sup>9,10,12</sup>.

Predictors of response to salvage radiotherapy were examined by Stephenson et al.<sup>60</sup> and they found that high Gleason score, high pre-radiotherapy PSA, negative RP surgical margins, short PSA doubling time, and seminal vesicle involvement were independently associated with adverse outcomes. A contemporary update of the original Stephenson predictive nomogram including patients treated with early SRT (at a PSA  $\leq$  0.2 ng/mL) showed that early SRT at low PSA levels after RP is associated with improved freedom from biochemical relapse and distant metastases rates<sup>61</sup>.

#### 2.2.2 Optimizing salvage radiotherapy with androgen deprivation therapy

Prospective studies have shown that androgen deprivation therapy (ADT) combined with primary radiotherapy for intermediate- and high-risk prostate cancers improves overall survival<sup>62</sup>. The combination of ADT to radiation in the postoperative setting was for long time a matter of debate. Recently the results of prospective phase III randomized were published demonstrating a benefit of the combined treatment<sup>63,64</sup>. In the RTOG 9601, 771 men with an elevated serum PSA following radical prostatectomy were randomly assigned to radiation plus the anti-androgen bicalutamide for two years or radiation alone. The first interim results at a median follow up of 7 years were negative for the primary endpoint, overall survival; however, the latest report at a median follow-up of 12.6 years showed an actuarial 10-year overall survival of 82% for salvage radiation plus ADT and 78% for salvage radiation plus placebo (HR: 0.75; 95% CI: 0.58-0.98)<sup>63</sup>.

The GETUG-AFU 16 is a phase III study that randomized men with biochemical failure after surgery to salvage radiation alone versus salvage radiation combined with 6 months of LHRH agonists. The 10 years results showed that SRT combined with short-term androgen suppression significantly reduced risk of biochemical or clinical progression and death compared with salvage radiotherapy alone. The results of the GETUG-AFU 16 trial confirm the efficacy of androgen suppression plus radiotherapy as salvage treatment in patients with increasing PSA concentration after RP for prostate cancer<sup>64</sup>. Finally, it is worth to mention that, the current National Comprehensive Cancer Network (NCCN) guidelines recommend a duration of 6–24 months of ADT combined SRT.

## 2.3. Role of new imaging modalities in identifying local recurrence after RP

### **2.3.1 The role for MRI in the identification of prostate cancer recurrence after RP**

In men with biochemical recurrence following local treatment with curative intent for prostate cancer, it is important to identify those who will likely benefit from local salvage therapy. Imaging should provide a step-by-step multimodal approach that facilitates both local and systemic staging. Clinical guidelines recommend the use of both nuclear medicine imaging (positron emission tomography [PET] / computed tomography [CT] scans) and magnetic resonance imaging (MRI) to assess local recurrence and distant metastases<sup>65,66</sup>. Multiparametric MRI (mpMRI) is accurate in early detection of prostate cancer local recurrence after RT and RP<sup>66</sup>. T2w sequences very accurately represent the postsurgical anatomy. In most cases, a local recurrence differs from normal postoperative inflammation and fibrosis. Fibrotic tissue has a lower signal intensity (SI) than recurrent tissue<sup>67</sup>. Recurrent tissue can have various forms, including curly, semi-circular, nodular, and plaque-like masses. In the case of asymmetric perianastomotic soft-tissue thickening with an SI in between the SIs for pelvic muscle and the surrounding adipose tissue, a local recurrence is likely to be present<sup>68</sup>. Functional criteria are based on diffusion-weighted imaging (DWI) and dynamic contrast enhancement (DCE), which represent the cellularity and vascularity of the tissue, respectively. DWI has good diagnostic accuracy in detecting local recurrence after RP when combined with other sequences<sup>68</sup>. Quite often, there is geometric distortion caused by susceptibility artefacts due to surgical clips. Local recurrence after RP, like primary tumours, shows high SI on high b-value DWI and low ADC values. In the case of artefact-altered DWI, DCE MRI is of particular importance<sup>69</sup>. DCE imaging plays the dominant role in the detection of RP recurrence. This technique has high sensitivity<sup>70–72</sup>; even tiny recurrence “foci” that may not be visible on T2WI tend to show significant enhancement in the early arterial phase, often with contrast wash-out<sup>66</sup>. In addition, post-RP recurrences enhance sooner and faster than normal postoperative changes<sup>73</sup>.

### **2.3.2 Role of PSMA PET CT in Identification of local recurrence**

In case of PSA recurrence, SRT is the only curative option, resulting in approximately 60% of the patients re-achieving an undetectable PSA. After 5 years, 80% of these men are free from progression<sup>74</sup>. The pre-SRT PSA level is a significant factor of progression, with more favorable results for patients with low PSA levels (0.5 ng/mL or less)<sup>61,75</sup>. Accordingly, European guidelines (EAU) recommend early SRT at a PSA <0.5 ng/mL. At the same time, use of restaging PSMA PET/CT is recommended by the 2021 EAU guidelines for patients with a relapsing PSA > 0.2 ng/mL. However, for clinical and imaging purposes, it is important to distinguish between two types of local recurrence and relapse outside tumor bed.

At PSA levels <1 ng/mL, most imaging methods are not suitable to detect the correlate for disease progression. Therefore, up to 20% of patients with SRT to the prostate bed (with or without including original seminal vesicle) without morphological correlate will be treated locally without actual local recurrence<sup>74</sup>. Prostate-specific membrane antigen (PSMA) is a cell surface protein with high expression in majority of prostate cancer<sup>76</sup>. 68Ga-PSMA has been used since 2012 as PSMA-ligand in recurrent prostate cancer<sup>77–79</sup>. Especially at low PSA levels, the detection rate of 68Ga-PSMA-11-PET/CT is significantly higher in comparison to other imaging methods. In a retrospective analysis for patients with biochemical progression after RP, Afshar-Oromieh et al. found that 69% of the patients had at least one positive lesion indicating prostate cancer recurrence. The detection rates were 43% for PSA levels ≤0.2 ng/mL, 58% for PSA >0.2 to ≤0.5 ng/mL and 72% for PSA >0.5 to ≤1.0 ng/mL. Tumor detection was clearly associated with PSA level and higher Gleason scores<sup>78</sup>. Bluemel et al. analyzed the impact of 68Ga-PSMA-11-PET/CT in patients with PSA failure and negative F-18-choline-PET/CT. Of 125 patients, 32 patients with negative F-18-choline-PET/CT received an additional 68Ga-PSMA-11-PET/CT, which detected sites of recurrence in 43.8%<sup>80</sup>.

1  
2  
3 The most common site of postoperative local recurrence, accounting for 57%–62% of relapse cases, is the  
4 vesicourethral anastomosis (VUA), which comprises the membranous urethra, bladder neck, and  
5 surrounding soft tissue<sup>81</sup>. Other typical local relapse sites are the lateral surgical margins (seminal vesicle  
6 bed) or remnant deferens, accounting for 25%–27% of cases<sup>82</sup>, and the retrovesical region (topography of  
7 rectoprostatic/Denonvilliers fascia) in 8%–21% of cases<sup>81</sup>. At PSMA PET/CT, local recurrence appears  
8 more often as focal ill-defined hypo-attenuating soft tissue with moderate PSMA uptake but can also simply  
9 appear as focal unilateral radiotracer uptake within the fibrotic tissue. It is important to point out that in most  
10 cases, postoperative local recurrence relies only on the PET component of the hybrid imaging because of  
11 the known lack of soft-tissue contrast in the pelvic region at CT<sup>77</sup>.

## 12 13 14 15 **2.4 Investigational treatment**

### 16 17 18 **2.4.1 Hypofractionated stereotactic body radiotherapy to the site of recurrence**

19  
20 External beam radiation therapy is one of the standard treatments for organ-confined prostate cancer, with  
21 cure rates similar to those of RP. Hypofractionation uses a higher dose-per-fraction of radiation, which  
22 reduces the number of fractions and the total duration of treatment, allowing greater comfort for the patient  
23 and lower costs, in addition to providing a therapeutic advantage in terms of tumor control and toxicity, as  
24 the  $\alpha/\beta$  of prostate cancer is lower than that of adjacent healthy tissues<sup>83</sup>. In 2018, a group of experts from  
25 the American Societies of Radiation Oncology, Medical Oncology, and Urology (ASTRO/ASCO/AUA)  
26 concluded that there is sufficiently robust evidence to justify using moderate hypofractionation in prostate  
27 cancer as common clinical practice<sup>84</sup>. A recent Cochrane review indicated that moderate prostate cancer  
28 hypofractionation (with fractions up to 3.4 Gy) provides oncological outcomes in terms of overall survival  
29 (OS), disease-free survival (DFS), and metastasis-free survival (MFS) similar to conventional fractionation,  
30 without a significant increase in acute or late toxicity<sup>85</sup>.

31 In addition, technical advances in the field of radiotherapy in recent years, such as intensity-modulated  
32 radiotherapy (IMRT), image-guided radiotherapy (IGRT), and stereotactic radiotherapy (SBRT), have  
33 enabled the progressive implementation of extreme hypofractionation (defined by fractions of at least 6 Gy)  
34 in various scenarios of localized prostate cancer treatment. The use of SBRT in prostate cancer has  
35 provided sufficient evidence in terms of tumor control results, quality of life reported by the patient, and low  
36 toxicity<sup>25,86,87</sup> to back its implementation in daily clinical practice. Moreover, the prostate cancer working  
37 group of the German Society of Oncology (DEGRO) but also the NCCN endorses the use of SBRT in the  
38 treatment of localized low and intermediate-risk prostate cancer, recommending its use in clinical trials in  
39 patients with the localized high-risk disease<sup>88-48</sup>.

40 The recent publication of two randomized trials comparing the use of extreme hypofractionation versus  
41 conventional fractionation (HYPO-RT-PC<sup>25</sup>, PACE-B trial<sup>87</sup>) has been crucial in supporting its use, although  
42 only the Scandinavian study (HYPO-RT-PC) reported results of long-term tumor and toxicity control. In  
43 2020, a randomized systematic review and meta-analysis of phase III trials were published comparing  
44 SBRT with normofractionated and hypofractionated regimens. It concluded that the ultra-hypofractionated  
45 regimens obtained similar 5-year disease-free survival results, with late gastrointestinal and genitourinary  
46 toxicity of <15% and <21%, respectively, when compared to hypofractionated regimens and conventional  
47 radiotherapy<sup>47</sup>.

48 Use of moderate hypofractionation is becoming a standard even in the postoperative setting. Retrospective  
49 and prospective single arm studies support a safe toxicity profile and a promising biochemical control rates  
50 with hypofractionation (PMID: 29178983). The recently reported results of the phase III clinical trial NRG-  
51 GU003 comparing hypofractionated post-operative prostate bed radiotherapy (HYPORT) to the  
52 conventional post-prostatectomy radiotherapy for men with prostate cancer determined that treatment with  
53 HYPORT yielded no increase in patient-reported genitourinary (GU) or gastrointestinal (GI) toxicity for trial  
54 participants, with a similar biochemical disease control at the 2 year follow-up.

55 To demonstrate the viability and safety of the use of SBRT in this clinical scenario, Repka et al<sup>50</sup> conducted  
56 a theoretical feasibility study of SBRT after RP based on the NTCP (Normal Tissue Complication  
57 Probability) model, using patients who had previously been treated by conventional EBRT for biochemical  
58 recurrence after prostatectomy. Using the presimulation CT, RTOG recommendations were applied to  
59 define postprostatectomy volumes, and a dose of 30 Gy was prescribed to the PTV in five fractions,  
60 corresponding to an equivalent dose in 2 Gy fractions (EQD2) of 64.3 Gy, assuming an  $\alpha/\beta$  value of 1.5



1  
2  
3 Gy. The NTCP model was applied to estimate the risk of late rectal and/or bladder toxicity. According to  
4 the NTCP model, the mean of grade $\geq$ 2 late rectal toxicity was estimated at 0.28% and of late grade 2  
5 toxicity on the bladder neck at 0.00013%, while the calculated average for the exacerbation of late urinary  
6 symptoms was 4.81%. The conclusion by the authors, considering the limitations of the NTCP model, is  
7 that using SBRT after surgery seems feasible and may offer a safe, convenient treatment option for patients  
8 in both the adjuvant and salvage after biochemical failure.

9 A prospective phase I study by Sampath et al. tested the usage of stereotactic dose-escalated radiotherapy  
10 on prostate bed in and showed a crude rate of biochemical control of 42% in the overall population<sup>90</sup>.  
11 Patients were treated with dose fractionation schedules of 35, 40 and 45 Gy in five fractions. Authors  
12 underlined that dose escalation to 45 Gy was feasible without increasing the rate of adverse events, but no  
13 improvement in PSA control was reported if compared to 40 Gy in 5 fractions. Furthermore, a recent  
14 propensity score analysis comparing focal stereotactic SRT and conventional radiotherapy for macroscopic  
15 prostate bed recurrence showed comparable bRFS and PFS rates between the two modalities. On the  
16 other hands, a lower rate of toxicity was confirmed for patients undergoing focal stereotactic SRT compared  
17 to conventional fractionated SRT, with acute GI and GU adverse events reported in 4.4% versus 44.4%  
18 ( $p < 0.001$ ) and 28.9% versus 46.7% ( $p = 0.08$ ) of patients, and late GI and GU adverse events reported in  
19 0% versus 13.3% ( $p = 0.04$ ) and 6.7% versus 22.2% ( $p = 0.03$ ) of patients, respectively<sup>91</sup>. Considering the  
20 favorable therapeutic ratio of this approach and the lower number of fractions needed, the authors  
21 suggested stereotactic is an attractive alternative to conventional SRT in this setting  
22

## 23 2.5 Rationale for performing the trial

24  
25 Radical prostatectomy and radiotherapy (RT) are the considered as backbones for treating localized  
26 disease<sup>1</sup>. However radical prostatectomy, 30 – 60% of patients will develop recurrent disease<sup>2,3</sup>. Several  
27 large randomized controlled trials have shown a benefit of postoperative radiation therapy in patients with  
28 a high risk of local recurrence after RPE, e.g. pT3 disease or positive resection margins<sup>4-8</sup>. In the era of  
29 high sensitivity PSA and PSMA-PET/CT, there has been additional evidence suggesting a similar  
30 oncological outcome if patients are treated with early salvage radiotherapy in case of a rising PSA after  
31 RPE instead of immediate adjuvant radiotherapy<sup>9-12</sup>. However, the above mentioned studies as well as the  
32 studies including patients receiving salvage radiotherapy in case of a macroscopic tumor recurrence in the  
33 prostate bed were done with conventionally fractionated radiotherapy, usually in 2 Gy per fraction<sup>4-12</sup>.

34  
35 In the setting of definite radiotherapy to the prostate, ultrahypofractionated radiotherapy has been used as  
36 a treatment option in patients with low or intermediate risk for a long time and there are published data with  
37 a reasonable follow up that shows excellent biochemical control with low high grade toxicity rates<sup>13-20</sup>. In  
38 addition, data on ultrahypofractionated in high-risk patients are emerging with several large trials being  
39 published with encouraging results<sup>21-26</sup>. The rationale for using ultrahypofractionated in patients treated for  
40 prostate cancer is the estimated low  $\alpha/\beta$  value of around 1.5 Gy<sup>27,28</sup>. Therefore, using a larger fraction dose  
41 is expected to improve the therapeutic ratio and consequently the probability of tumor control.  
42

43  
44 Although Data on moderate hypofractionation in the setting of postoperative radiotherapy with a fraction  
45 dose of up to 3 Gy per fraction does not seem to support this concern, given the low toxicity rates that were  
46 reported in several analyses<sup>29-38</sup>. However, data on postoperative ultrahypofractionated radiotherapy to the  
47 prostate bed remains immature. The rates of acute and late toxicities following ultrahypofractionated  
48 radiotherapy to the prostate bed were reported in retrospective and phase I studies are within the above  
49 mentioned ranges. The rate of acute  $\geq$  G2 GI and GU toxicities range from 0 – 50 % and 0 – 33.3 % and  
50 for late  $\geq$  G2 GI and GU toxicities from 0 – 11.5 % and 0 – 38.5 %<sup>39-48</sup>. This data suggests that SBRT to  
51 the prostate bed can be applied with toxicity rates similar to that of normofractionated or mildly  
52 hypofractionated radiotherapy  
53

54  
55 Further improvement in the oncological outcomes can be expected through technological developments in  
56 radiotherapy delivery and precise targeting of the local relapses in the prostate bed. A SRT using a  
57 ultrahypofractionated schedule delivered precisely in 5 fractions and limited only to the site of isolated  
58 macroscopic recurrence in the prostate bed as defined by PSMA-PET and multiparametric MRI (mpMRI)  
59 may represent a valid treatment strategy to improve the therapeutic ratio in these patients (short overall  
60 treatment time, better sparing of surrounding healthy tissues, increased dose to the target volume).

#### Rationale for combining ADT to SRT

- The benefit of ADT to salvage radiation has been demonstrated in two randomized phase III trials, RTOG 9601 and GETUG 16, which provided evidence of improved metastasis-free and overall survival and durable biochemical disease control with bicalutamide for 24 mo and ADT using LHRH agonists for 6 months, respectively.
- These studies support the current National Comprehensive Cancer Network (NCCN) guidelines to consider combination of 6–24 months of hormonal therapy with SRT in this setting.

### 3 STUDY OBJECTIVES AND DESIGN

#### 3.1 Hypothesis and primary objective

We hypothesize that focal SRT in combination with short-term ADT may further prolong or prevent progression, and improve the success of SRT for relapsing patients with a macroscopic relapse after RP. Through better definition and optimization of the target volumes sparing adjacent normal tissue, an improvement in the toxicity profile can be expected.

The main objective of the trial is to explore the efficacy and safety of combining 6 months short-term ADT to focal hypofractionated SRT delivered in 5 fractions where mpMRI and PSMA-PET CT are used to precisely identify the local recurrence and compare it to the published literature.

### 3.2 Primary and secondary endpoints

Primary endpoints:

- Biochemical relapse free survival at 2 years

Secondary endpoints:

- Acute side effects (until 90 days after end of radiation) of grade 3 or higher based on CTCAE v5
- Progression-free survival
- Metastasis-free survival
- Late side effects
- Quality of life (based on EORTC QLQ-C30, QLQ-PR25)

### 3.3 Study design

This is a single arm, prospective phase II multicenter study.

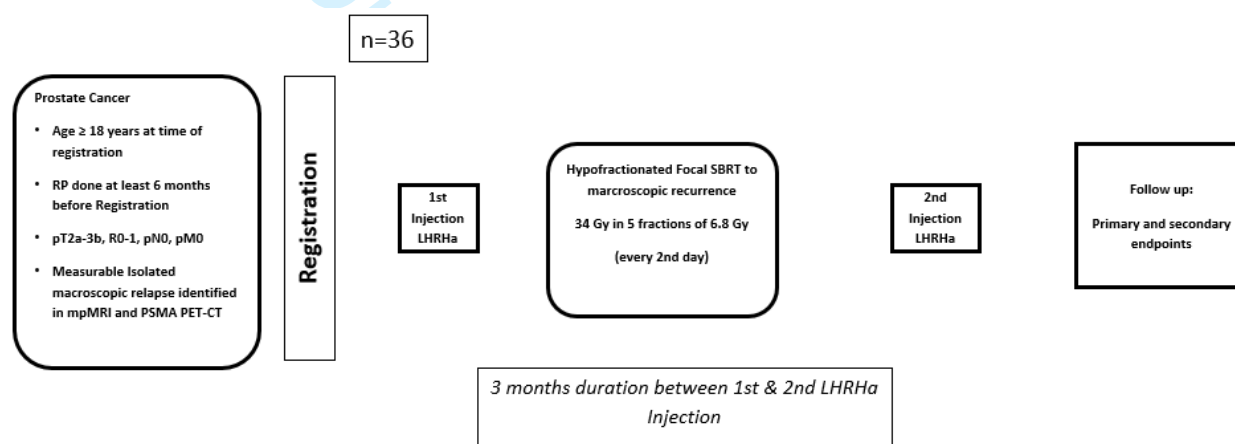

### 3.4. Study intervention

#### 3.4.1 Pre-registration imaging

Within 3 months prior to registration either, PSMA PET/CT is mandatory to exclude regional or distant metastasis. Both 18F- and 68G-PSMA tracers are allowed. A mpMRI of the prostate bed acquired within 3 months before registration is mandatory to define the extension of local recurrence.

#### 3.4.2 Radiation treatment (SBRT)

##### 3.4.2.1 Patient's positioning, immobilization, data acquisition and simulation:

A treatment planning CT scan, with the patient in the same position as during treatment, is required to define the clinical target volume (GTV), the planning target volume (PTV) and the critical structures. Patients will be positioned in supine position. Leg and knee support is highly recommended. Each patient will be positioned in an individualized immobilization device in the treatment position on a flat table. It is recommended that patients are scanned/simulated and treated with comfortably full bladder. An empty rectum is recommended for prostate bed radiotherapy. An example of a bladder and rectal protocol: An empty rectum is provided by using a rectal enema +/- 60 minutes before planning CT. After emptying rectum and bladder the patient is asked to drink the amount of 500-750 ml of water. The planning CT is then performed after ca. 40 minutes. The patient repeats the bladder filling procedure during the entire treatment courses. An endorectal balloon can be used for repositioning purposes as per local institutional standards.



Radiopaque fiducial markers (mandatory for robotic-based treatments) may be implanted in the prostate bed 1 week before the planning CT scan at the discretion of the treating center.

The position of the patient will be reproduced using skin marks and orthogonal laser beams during treatment preparation and execution. The treatment planning CT scan should include at least the pelvis from the lower part of the second lumbar vertebra (L2) to the lower part of the ischial tuberosities. The entire target volume and all organs at risk (OAR) must be included in CT scan. CT slice thickness should be  $\leq 2$  mm. The GTV, PTV and OAR must be outlined on all CT slices in which these structures are visible.

Morphological and topographical information given by clinical examination, mpMRI and PET/CT, must be integrated to delineate the target volumes. Rigid or deformable co-registration is allowed.

### 3.4.2.2 Volumes

#### 3.4.2.2.1 Definition of target volumes (refer to appendix 2 & 3):

- The Gross Tumor Volume of the suspicious local recurrence (GTV) is defined by the physician as all known gross disease *before any treatment* as defined by the CT/MRI images and PET scan using rigid or deformable fusion) and/or clinical information.
- The Planning Target Volumes (PTV) will provide margin around the GTV to compensate for variability in daily treatment set-up and internal motion due to breathing or motion during treatment. The PTV should encompass the GTV with a margin of 5 mm in all directions.

#### 3.4.2.2.2 Organs at Risk (OAR)

- *Delineation:*

The OAR should be delineated according to the RTOG guidelines. For more details please see RTOG/NRG Oncology web site to view the normal pelvis atlas for examples of normal tissue contours (<http://www.rtog.org/CoreLab/ContouringAtlases/MaleRTOGNormalPelvisAtlas.aspx>).

*Bladder:* this organ is defined by the external wall (5-mm thickness), delineated on each slide, from the dome to the bladder neck and the start of the VUA.

*VUA and distal urethra:* from the bladder neck to the distal urethra inside the penile bulb using the mpMRI sequences. A 2-mm isotropic margin is added around these structures to create a PRV volume.

*Rectum:* defined by the external wall from the recto-sigmoid junction to ischial tuberosities (5-mm thickness).

*Femoral heads:* delineated from the top of the hip joint to the small trochanter.

*Bowel bag:* from the most inferior small or large bowel loop to 1 cm at minimum above PTV for coplanar beam plans, or more if non-coplanar beams or tomotherapy plans are used.

- *Dose constraints to OAR:*

It is strongly recommended that dose constraints are not exceeded. If a dose constraint cannot be achieved due to overlap of the target with an OAR or PRV, the dose per fraction can be lowered or the target coverage compromised in order to meet the constraint.

| Organ at risk              | Dose constraint              | Aim                  |
|----------------------------|------------------------------|----------------------|
| Rectal wall                | V18.1 Gy<br>V29 Gy<br>V36 Gy | <50%<br><20%<br><1cc |
| Bladder wall               | V18.1 Gy<br>V37 Gy           | <40%<br><10cc        |
| PRV_VUA and distal urethra | V36 Gy                       | <1cc                 |

|               |                    |              |
|---------------|--------------------|--------------|
| Femoral heads | V14.5 Gy           | <5%          |
| Penile bulb   | V29.5 Gy           | <50%         |
| Bowel         | V18.1 Gy<br>V30 Gy | <5cc<br><1cc |

### 3.4.2.3 Treatment technique.

Intensity modulated radiotherapy (IMRT) or use of rotational techniques is mandatory. By definition only dosimetry obtained by inversed treatment planning is considered as IMRT. IMRT may be performed by using Step-and-Shoot-Technique, Sliding-Window-Technique or Volumetric Modulated Arc Therapy (VMAT), including MRI-guided radiation therapy systems (MRIdian® or Elekta Unity®). Treatment with Cyberknife® is allowed (implant of radiopaque fiducial markers 1 week before the planning CT scan is mandatory).

### 3.4.2.4 Dose computation.

- Any treatment planning system, capable of 3D-dose computation using a convolution algorithm, will be used. The PTV may be treated with any combination of coplanar or non-coplanar fields shaped to deliver the specified dose while minimizing dose to the normal tissue OAR. Field arrangements will be determined by 3D planning to produce the optimal conformal plan in accordance with volume definitions. The treatment plan used for each patient will be based on an analysis of the volumetric dose including DVH analyses of the PTV and critical OAR. Each field is to be treated daily.
- The PTVs should be outlined in all relevant planes. The dose distribution should be shown at least in the plane through the beam axes.
- Dose distribution is obtained in a 3-dimensional pattern with Dose Volume Histogram (DVH). DVH are to be used for assessing dose to the PTVs and all normal tissues at risk.

### 3.4.2.5. Equipment and tools.

- Both a linear accelerator, tomotherapy and Cyberknife is allowed.

### 3.4.2.6 Dose prescription.

A total dose of 34 Gy (80% of the maximal dose) will be delivered in 5 fractions and fractions every second day (NTD<sub>2Gy</sub> 80 Gy  $\alpha/\beta=1.5\text{Gy}$  for tumor control and 66.6 Gy  $\alpha/\beta=3\text{Gy}$  for late toxicity). Treatment will be prescribed to the periphery of the target (80% of the dose (=34Gy), should cover 90% of the PTV) covering the PTV. A maximal dose of 40 Gy is allowed to GTV. The priority will be given to the respect of dose constraints over PTV coverage.

### 3.4.2.7 Treatment Verification.

Daily patient set-up shall be performed using laser alignment to reference marks on the skin of the patient. Daily cone-beam CT set-up and on-line correction of patient's position is mandatory. If multiple targets will be irradiated with multiple isocenters, a CBCT prior to every treatment for every isocenter is mandatory. Patient immobilization devices can be used according to the institutional policy.

## 3.4.3 Androgen deprivation therapy

- All patients should receive an LHRH-agonist or antagonist for a duration of 6 months using 3 monthly formulations. In case of LHRH-agonist flare prevention with an anti-androgen is

recommended for at least 5 days prior to the first injection of the agonist and should not be continued for longer than 15 days of the 1st month duration.

- ADT should start no later than the 1<sup>st</sup> SBRT fraction and no earlier than 2 weeks before the start of radiotherapy.
- Palliative ADT should not be started for biochemical progression without documented clinical progression. In case of symptomatic progression, palliative ADT is mandatory. In case of clinical asymptomatic progression, delayed ADT until progression to a symptomatic state is allowed in well-informed men (EAU 2016 guidelines). In general, we would recommend to start ADT in asymptomatic patients only if conventional imaging would confirm clinical progression. So we would not recommend the start of ADT for PET-positive lesions not suspicious on conventional imaging (CT/MRI/bone scintigraphy).
- ADT-related toxicity should be managed according to Nguyen et al. Eur Urol. 2015 May;67(5):825-36.

## 4 STUDY POPULATION AND STUDY PROCEDURES

### 4.1 Inclusion and exclusion criteria, justification of study population

#### Inclusion criteria:

1. Written informed consent according to ICH/GCP regulations before registration and prior to any trial specific procedures
2. Age  $\geq$  18 years at time of registration
3. WHO performance status 0-1
4. Lymph node negative adenocarcinoma of the prostate treated with radical prostatectomy (RP) at least 6 months before trial registration. Tumor stage pT2a-3b, R0-1, pN0 or cN0 according to the UICC TNM 2009.
5. Evidence of measurable local recurrence at the prostate bed detected by PSMA PET/CT and mpMRI within the last 3 months. In case of unclear local recurrence, a biopsy confirmation is recommended.
6. Patient must have non-metastatic (N0, M0) disease, as defined by a lack of nodal or distant metastases seen on PSMA PET/CT scan
7. Patients must have non-castrate levels of serum testosterone ( $\geq$ 50 ng/dL).
8. Patients must not have previously received hormonal therapy (LHRH agonists, antiandrogen, or both, or bilateral orchiectomy).
9. Absence of any psychological, familial, sociological or geographical condition potentially hampering compliance with the study protocol and follow-up schedule; those conditions should be discussed with the patient before registration in the trial

#### Exclusion criteria:

1. Persistent PSA ( $>$  0.4 ng/mL) 4 to 20 weeks after RP
2. Previous hematologic or primary solid malignancy within 3 years prior registration with the exception of curatively treated localized non-melanoma skin cancer
3. Usage of products known to affect PSA levels within 4 weeks prior to start of trial treatment phase including any form of androgen suppression agents and androgen deprivation therapy
4. Bilateral hip prosthesis
5. Severe or active co-morbidity likely to impact on the advisability of salvage RT
6. Treatment with any experimental drug or participation within a clinical trial within 30 days prior to registration (exception: concurrent participation in the biobank studies is allowed)

### 4.2 Recruitment and screening:

Patient registration will only be accepted from authorized investigators.

Prior to registration, the following steps have to be taken:

- Fill in the patient screening (used for monitoring potentially eligible patients, and will be destroyed after the end of the accrual period. Screening list is not a part of the CRFs), enrollment and identification lists.
- Check the eligibility criteria
- Obtain signed and dated written informed consent from the patient prior to any protocol-specific procedure according to ICH/GCP and local guidelines.
- Patients must complete the pre-treatment of quality of life assessment per protocol

Only electronic case report forms (eCRF) will be used. The use of worksheets is allowed if the copies of the templates are documented in the trial master file (TMF). The used worksheets must be kept with the patient charts.

Registration is done via Internet 'https://secutrial.insel.ch'. SecuTrial (interActive Systems) will be used as database. In case of problems investigators can phone the study coordinator from Monday through Friday. For technical difficulties, investigators are recommended to contact data management of CTU Bern

E-mail: datamanagement@ctu.unibe.ch

In order to receive authorization for online registration/data entry, sites must send a copy of the completed staff list to the Sponsor. Login details for the online database will be sent to authorized persons.

### 4.3 Study procedures

**Schedule of assessments (Table 1)**

| Required investigation               | Inclusion                          |                                   | Treatment | 1 Months after RT | 3 Months after RT | 6 Months after RT | Every 6 Months till end of 2 <sup>nd</sup> year after RT then once per year till 60 months |
|--------------------------------------|------------------------------------|-----------------------------------|-----------|-------------------|-------------------|-------------------|--------------------------------------------------------------------------------------------|
|                                      | Within 12 weeks prior registration | Within 2 weeks prior registration |           |                   |                   |                   |                                                                                            |
| Eligibility Check                    | x                                  |                                   |           |                   |                   |                   |                                                                                            |
| Signed informed consent              | x                                  |                                   |           |                   |                   |                   |                                                                                            |
| Record prior history                 | x                                  |                                   |           |                   |                   |                   |                                                                                            |
| <b>Visits</b>                        |                                    |                                   |           |                   |                   |                   |                                                                                            |
| Physical Examination                 |                                    | x                                 |           | x                 | x                 | x                 | x                                                                                          |
| <b>Biochemistry (Blood Samples)*</b> |                                    |                                   |           |                   |                   |                   |                                                                                            |
| PSA                                  |                                    | x                                 |           | x                 | x                 | x                 | x                                                                                          |
| Testosterone                         |                                    | x                                 |           | x                 | x                 | x                 | x                                                                                          |
| <b>Radiology</b>                     |                                    |                                   |           |                   |                   |                   |                                                                                            |
| PSMA PET                             | x                                  |                                   |           |                   |                   |                   |                                                                                            |
| MRI                                  | x                                  |                                   |           |                   |                   |                   |                                                                                            |
| <b>Radiotherapy</b>                  |                                    |                                   |           |                   |                   |                   |                                                                                            |
| Treatment planning                   |                                    |                                   | x         |                   |                   |                   |                                                                                            |
| Record Planning results              |                                    |                                   | x         |                   |                   |                   |                                                                                            |
| <b>Adverse Events</b>                |                                    |                                   |           |                   |                   |                   |                                                                                            |
| Baseline toxicity                    |                                    | x                                 |           |                   |                   |                   |                                                                                            |
| Acute toxicity                       |                                    |                                   | x         | x                 | x                 |                   |                                                                                            |
| Late toxicity                        |                                    |                                   |           |                   |                   | x                 | x                                                                                          |
| <b>EORTC QoL questionnaire</b>       |                                    |                                   |           |                   |                   |                   |                                                                                            |
| QLQ-C30                              |                                    | x                                 |           | x                 | x                 | x                 | x                                                                                          |
| QLQ-PR25                             |                                    | x                                 |           | x                 | x                 | x                 | x                                                                                          |

### \* Blood samples

The obtained blood samples are used only for PSA and testosterone values. The measurement for this labs is conducted within the local hospital laboratory of each participating centre and the rest samples will be disposed afterwards. No blood will be collected or stored or used for other research purposes within the frame of this trial.

## 4.4 Withdrawal and discontinuation

Patients have the right to discontinue their participation in the trial for any reason and at any time, without prejudice to further treatment. Patients who refuse further trial treatment will be transferred to follow-up phase and continue to receive the follow-up assessments as scheduled. Patients who withdraw their consent (i.e. refuse further data collection), will be informed that all data and samples collected until the time point of their withdrawal will be kept coded and used. For the patient's security, a last examination should be performed.

Patients may be withdrawn at any time from trial treatment at the discretion of the treating physician or the investigator due to a SAE, or based on any other relevant medical condition. The patient then will be transferred to the follow-up phase and continue to receive the follow-up assessments as scheduled.

## 5 STATISTICS AND METHODOLOGY

### 5.1. Statistical analysis plan and sample size calculation

According to the published prospective trials and retrospective series reporting the outcome of the normofractionated SRT, we define biochemical relapse free survival at 2 years of 60% as poor and of 80% as promising outcome that would justify further investigation. We will therefore test the null hypothesis that the biochemical relapse free survival at 2 years is lower than 60% against the alternative that it is at least 80%. Based on a one-sample binomial exact test with a one-sided alpha of 5%, 36 patients are required to reach a power of 80%, not taking into account patients lost to follow-up. The null hypothesis will be rejected if at least 27 patients show biochemical relapse free survival at 2 years.

We will control the safety of the intervention during the trial by assessing acute side effects (grade 3 or higher) at 90 days after 12 and 24 patients. The trial will be stopped if there is evidence that the proportion of patients with acute side effects (grade 3 or higher) is larger than 27%, the proportion observed that will be tested using one-sample binomial exact tests with a one-sided alpha of 5%.

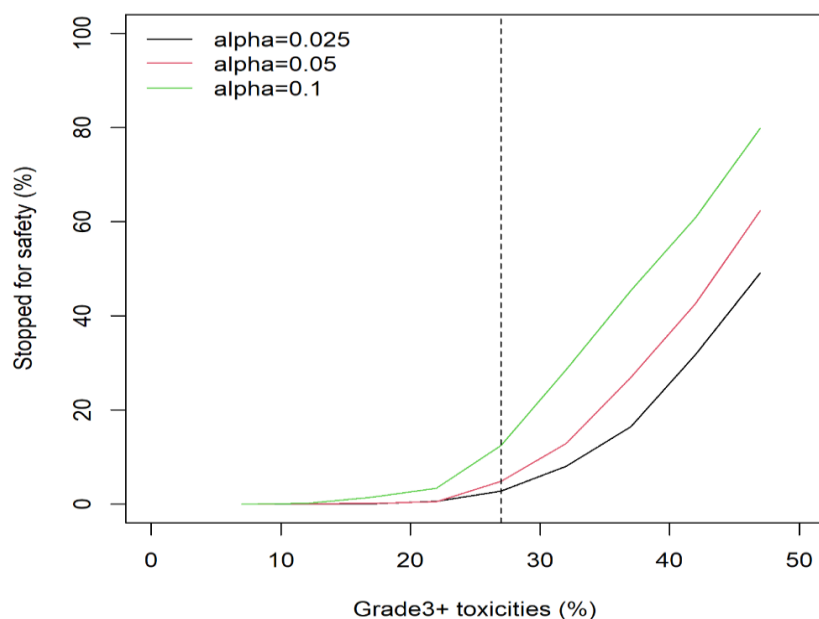

Time-to-event outcomes will be analyzed using Kaplan-Meier-curves, the proportion of responders at 1 and 2 years, and the restricted mean survival time at 1 and 2 years with 95% confidence interval. Binary outcomes will be reported using absolute and relative frequencies with 95% confidence intervals.

The probability of biochemical relapse free survival and metastasis-free survival will be estimated using the Kaplan-Meier method. Cox proportional hazards models will be fit to assess the effects of treatment and baseline clinical and pathologic features (such as PSA, PSA doubling time, Gleason score etc) on biochemical relapse free survival and metastasis free survival

## 5.2. Definition of endpoints

### 5.2.1 Biochemical relapse free survival (primary endpoint)

The initial PSA at time of registration will be the starting point. Freedom from biochemical progression is counted from the day of registration to the day of either first recorded biochemical progression as defined below, clinical progression or death due to clinical progression. Patients not experiencing a biochemical or clinical failure or death due to clinical progression are censored at time of last assessment.

A biochemical recurrence is defined by any confirmed PSA rise above 0.20 ng/mL with a confirmatory rise at least 2 weeks later. For those patients whose PSA does not drop below 0.20 ng/mL at time of first response assessment at 3 months are considered as non-responders to treatment and are considered to have a biochemical recurrence in case a second measurement at least 2 weeks later confirms a rising PSA above this level.

### 5.2.2 Metastasis-free survival:

Metastasis-free survival is defined as time between registration and the appearance of a metastatic recurrence (any M1) as suggested by PET-CT or death due to any cause. Patients without any of the events of interest (including those with biochemical relapse only) are censored at the date of the last follow-up. Second cancers are not considered events in terms of this endpoint. In case of biochemical progression, re-staging will be made with PET-CT imaging preferably with the same tracer used before registration. In case of negative PET findings at biochemical relapse, a new PET imaging should be repeated on a 6-monthly basis or earlier in case clinically indicated.



### 5.2.3 Clinical progression-free survival:

Clinical progression-free survival is defined as time between registration and the appearance of a new recurrence (any N1 or M1) as suggested by PET-CT, symptoms related to progressive PC, or death due to any cause.

- A local recurrence is defined as the appearance of evidence of a recurrence within the prostate bed. Confirmation of the recurrence by biopsy is recommended, whenever possible.
- A regional nodal recurrence is defined as a radiographic (PET-CT) evidence of a lymphadenopathy in the pelvis in a patient without the diagnosis of hematologic/lymphatic disorder associated with lymphadenopathy or if there is histopathological evidence. Histologic confirmation is not required although recommended, especially in the absence of biochemical recurrence.
- Distant recurrence is defined as the appearance of distant metastases (M1a, M1b, M1c) outside the pelvis evidenced by PET-CT. Patients without any of the events of interest (including those with biochemical relapse only) are censored at the date of the last follow-up.
- Second cancers are not considered events in terms of this endpoint. Detailed analysis per subsite of recurrence (local, regional and distant) with time-to-event analysis will be performed. In case of biochemical progression, re-staging will be made with PET-CT imaging preferably with the same tracer used before registration. In case of negative PET findings at biochemical relapse, repeat PET imaging should be repeated on a 6-monthly basis or earlier in case clinically indicated.

### 5.2.4 Acute and late toxicity:

Radiotherapy toxicity will be assessed according to NCI CTCAE v5.0. Special attention shall be given to diarrhea, fecal incontinence, proctitis, rectal hemorrhage, rectal pain, hematuria, urinary frequency, urinary urgency, urinary retention, urinary incontinence, cystitis non-infective and erectile dysfunction. Acute toxicity is defined as occurring during treatment and up to 3 months after completion of treatment. Late toxicity is defined as occurring later than 3 months after end of treatment.

### 5.2.5 Quality of life:

All patients registered into this trial are to complete QoL questionnaires at the defined timepoints (see table 1). A longitudinal design is used. Patients are asked to complete a QoL questionnaire.

The EORTC QoL questionnaire (QLQ) C-30 Core questionnaire (version 3) and the prostate cancer module EORTC QLQ PR25 will be used. The QoL questionnaire including all these instruments will be provided for the major languages spoken in the participating centers.

## **5.3. Handling of missing data and drop-outs**

We expect that all registered patients have complete baseline data. All patients that have at least one outcome assessment can be considered in repeated-measures analyses. Models will implicitly correct for missing data based on the missing at random mechanism. If there are patients with no outcome data at all, we will perform multiple imputations. For the time-to-event analysis, patient drop-outs will be accounted for by censoring.

## **6 Regulatory Aspects and Safety**

### **6.1 Local regulations / Declaration of Helsinki**

The study will be carried out in accordance to the protocol and with principles enunciated in the current version of the Declaration of Helsinki, the guidelines of Good Clinical Practice (GCP) issued by ICH, the Swiss Law and Swiss regulatory authority's requirements. The CEC and regulatory authorities will receive annual safety and interim reports and be informed about study stop/end in agreement with local requirements.

## 6.2 (Serious) Adverse Events and notification of safety and protective measures

An Adverse Event (AE) is any untoward medical occurrence in a patient or a clinical investigation subject which does not necessarily have a causal relationship with the trial procedure. An AE can therefore be any unfavourable or unintended finding, symptom, or disease temporally associated with a trial procedure, whether or not related to it.

A Serious Adverse Event (SAE) (ClinO, Art. 63) is any untoward medical occurrence that

- Results in death or is life-threatening,
- Requires in-patient hospitalisation or prolongation of existing hospitalisation,
- Results in persistent or significant disability or incapacity, or
- Causes a congenital anomaly or birth defect

Both Investigator and Sponsor-Investigator make a causality assessment of the event to the trial intervention, (see table below based on the terms given in ICH E2A guidelines). Any event assessed as possibly, probably or definitely related is classified as related to the trial intervention.

| Relationship                                                                            | Description                                                                                                               |
|-----------------------------------------------------------------------------------------|---------------------------------------------------------------------------------------------------------------------------|
| Definitely                                                                              | Temporal relationship<br>Improvement after dechallenge*<br>Recurrence after rechallenge<br>(or other proof of drug cause) |
| Probably                                                                                | Temporal relationship<br>Improvement after dechallenge<br>No other cause evident                                          |
| Possibly                                                                                | Temporal relationship<br>Other cause possible                                                                             |
| Unlikely                                                                                | Any assessable reaction that does not fulfil the above conditions                                                         |
| Not related                                                                             | Causal relationship can be ruled out                                                                                      |
| *Improvement after dechallenge only taken into consideration, if applicable to reaction |                                                                                                                           |

Both Investigator and Sponsor-Investigator make a severity assessment of the event as mild, moderate or severe. Mild means the complication is tolerable, moderate means it interferes with daily activities and severe means it renders daily activities impossible.

### Reporting of SAEs (see ClinO, Art. 63)



1  
2  
3 All SAEs are documented and reported immediately (within a maximum of 24 hours) to the Sponsor-  
4 Investigator of the study.

5 If it cannot be excluded that the SAE occurring in Switzerland is attributable to the intervention under  
6 investigation, the Investigator reports it to the Ethics Committee via BASEC within 15 days.

7 If the SAE occurs at one of the study sites, the coordinating Investigator reports the events to the Ethics  
8 Committee concerned, within 15 days.  
9

### 10 11 **Follow up of (Serious) Adverse Events**

12  
13 All subjects with SAE must be followed up for outcome. The Ethics Committee must be informed according  
14 regulations.  
15

### 16 17 **Notification of safety and protective measures** (see ClinO, Art 62, b)

18  
19 If immediate safety and protective measures have to be taken during the conduct of the study, the  
20 investigator notifies the Ethics committee of these measures, and of the circumstances necessitating them,  
21 within 7 days.  
22

### 23 24 **6.3 (Periodic) safety reporting**

25  
26 An annual safety report (ASR/DSUR) is submitted once a year to the local Ethics Committee by the  
27 Investigator (ClinO, Art. 43 Abs).  
28

### 29 30 **6.4 Radiation**

31 If the permitted dose guidance value (5 mSv per year if no direct benefit is expected for the participants) is  
32 exceeded at any time, the local Investigator notifies the Ethics Committee via BASEC within 7 working days  
33 of it becoming known (see ClinO, Art. 44).  
34

### 35 36 **6.5 Pregnancy**

37  
38 Since this cohort only consists of male patients, pregnancy of the participant is not possible. However,  
39 patients are counselled regarding strict birth control for at least 6 months after treatment for themselves  
40 and their partners.  
41

### 42 43 **6.6 Amendments**

44  
45 Substantial changes to the study setup and study organization, the protocol and relevant study documents  
46 are submitted to the Ethics Committee for approval before implementation. Under emergency  
47 circumstances, deviations from the protocol to protect the rights, safety and well-being of human subjects  
48 may proceed without prior approval of the Ethics Committee. Such deviations shall be documented and  
49 reported to the Ethics Committee as soon as possible.  
50

51  
52 Substantial amendments are changes that affect the safety, health, rights and obligations of participants,  
53 changes in the protocol that affect study objective(s) or central research topic, changes of study site(s) or  
54 of study leader and sponsor (ClinO, Art. 29).  
55

56  
57 A list of all non-substantial amendments will be submitted once a year to the competent EC together with  
58 the ASR.  
59  
60

## 6.7 (Premature) termination of study

The sponsor-investigator has the right to close this study (or, if applicable, individual segments thereof, e.g., recruitment) at any time, which may be due but not limited to the following reasons:

- If risk-benefit ratio becomes unacceptable owing to, for example,
- Safety findings from this study, e.g., SAEs,
- Results of parallel clinical studies,
- Results of parallel animal studies (e.g., toxicity, teratogenicity, carcinogenicity, or reproduction toxicity),
- If the study conduct, e.g., recruitment rate, drop-out rate, data quality, protocol compliance, does not suggest a proper completion of the trial within a reasonable time frame.

The Investigator has the right to close his centre at any time. For any of the above closures, the following applies:

- Closures should occur only after consultation between involved parties,
- All affected institutions, e.g., IEC(s) or IRB(s), competent authority, study centre, head of study centre must be informed as applicable according to local law,
- The Investigator will retain all study materials unless notification will be given by the sponsor for destruction,
- In case of a partial study closure, ongoing patients, including those in post study follow-up, must be cared for in an ethical manner.

Upon regular study termination, the Ethics Committee is notified via BASEC within 90 days (ClinO, Art. 38).

Upon premature study termination or study interruption, the Ethics Committee is notified via BASEC within 15 days (ClinO, Art. 38).

A final report is submitted to the Ethics Committee via BASEC within a year after completion or discontinuation of the study, unless a longer period is specified in the protocol (ClinO, Art. 38)

Essential documents will be archived safely and securely in such a way that ensures that they are readily available upon authorities' request. Patient (hospital) files will be archived according to local regulations and in accordance with the maximum period of time permitted by the hospital.

After termination of the study, all study files must be archived according to the Ordinance on Clinical Trials in Human Research (ClinO), Art. 45:

<sup>1</sup> The sponsor must retain all data relating to the clinical trial ... at least for ten years after the completion or discontinuation of the clinical trial.

<sup>2</sup> The investigator must retain all documents required for the identification and follow-up of participants, and all other original data, for at least ten years after the completion or discontinuation of the clinical trial.

## 6.8 Insurance

Insurance will be provided by the University Hospital of Bern, Inselspital. A copy of the certificate is filed in each investigator site file and the trial master file.

# 7 FURTHER ASPECTS

## 7.1 Overall ethical considerations

### 7.1.1 Patient protection

The responsible investigator will ensure that this study is conducted in agreement with either the Declaration of Helsinki (Tokyo, Venice, Hong Kong, Somerset West and Edinburgh amendments) or the laws and regulations of the country, whichever provides the greatest protection of the patient.

The protocol has been written, and the study will be conducted according to the ICH Harmonized Tripartite Guideline for Good Clinical Practice (<http://www.ich.org/products/guidelines/efficacy/efficacy-single/article/good-clinical-practice.html>).

The protocol will be approved by the Local, Regional or National Ethics Committees.

### 7.1.2 Subject identification

Trial-related data of the patient will be provided in a coded manner to the Sponsor. The names of the patients will not be disclosed to the University Hospital Bern, Switzerland. A sequential UPN will be attributed to each patient registered into the trial. Identification of patients must be guaranteed at the center. In order to avoid identification errors the UPN have to be provided on the CRF. Use the patient screening, enrollment and identification list. Patient confidentiality will be maintained according to applicable legislation. Patients must be informed of, and agree to, data transfer and handling, in accordance with local regulations.

### 7.1.3 Informed consent

All patients will be informed of the aims of the study, the possible adverse events, the procedures and possible hazards to which he/she will be exposed, and the mechanism of treatment allocation. They will be informed as to the strict confidentiality of their patient data, but that their medical records may be reviewed for trial purposes by authorized individuals other than their treating physician.

It is the responsibility of the individual investigator to translate the enclosed informed consent document. The translated version should be dated and version controlled.

It will be emphasized that the participation is voluntary and that the patient is allowed to refuse further participation in the protocol whenever he/she wants. This will not prejudice the patient's subsequent care. Documented informed consent must be obtained for all patients included in the study before they are registered. This must be done in accordance with the national and local regulatory requirements.

## 7.2 Risk-benefit assessment

This trial investigates the use of ultrahypofractionated SRT for patients with biochemical progression after prostatectomy who developed isolated local recurrence with no evidence of metastasis. For this group of patients, conventional SRT is the standard of care. Previous studies have shown that ultrahypofractionated RT is safe and can be considered as standard of care in treatment of primary prostate cancer. The use of ultrahypofractionated SRT was reported in various retrospective series and phase I trials.

Patients presenting disease progression with radiological evidence of disease either loco-regionally and/or systemically (bone and/or lymph nodes) could undergo biopsy depending on clinical judgment, i.e. if the risks of the biopsy procedure are clinically acceptable. This will be discussed with patients at an individual basis.

## 8 QUALITY CONTROL AND DATA PROTECTION

### 8.1 Quality measures

For quality assurance the sponsor, the Ethics Committee or an independent trial monitor may visit the research sites. Direct access to the source data and all study related files is granted on such occasions. All involved parties keep the participant data strictly confidential.

## 8.2 Data recording and source data

The investigators will maintain appropriate medical and research records for this trial, in compliance with ICH-GCP (E6) and regulatory and institutional requirements for the protection of confidentiality of subjects. SecuTrial (interActive Systems) will be used as database. The principal investigator, sub-investigator, and clinical research nurses or coordinators will have access to the records.

The principal investigators will permit authorized representatives of the Sponsor and regulatory agencies to examine (and when required by applicable law, to copy) clinical records for the purposes of quality assurance reviews, audits, and evaluation of the study safety and progress.

### 8.2.1 Case Report Forms

The CRFs will be electronic (eCRF). All data requested on the CRFs must be recorded and the recorded data should be consistent with the source documents or the discrepancies should be explained. The Investigator should ensure the accuracy, completeness, and timeliness of the data reported in the CRF and all other required reports. Generally, the CRFs should be completed within one week of completion of a patient visit.

### 8.2.2 Specification of source documents

Source documents must be available at the site to document the existence of the study participants and must include the original documents relating to the study, as well as the medical treatment and medical history of the participant. Where source documents for specific entries in the CRF are not available, this must be explicitly documented in a note to file. Any data recorded directly in the CRF will be considered as source data. Any change or correction to source data should be dated, initialed, and explained (if necessary) and should not obscure the original entry. The use of worksheets is allowed if the copies of the templates are documented in the trial master file (TMF). The used worksheets must be kept with the patient charts.

For all data captured in the CRF, the location of the source should be documented on a list of source documents, which will be stored in the investigator site file at each study site. Only the local investigator, the responsible study nurse team, the study monitor and the authorities can access this document.

### 8.2.3 Record keeping / archiving

Essential documents (written and electronic), including images and radiotherapy plans must be retained for a period of at least 10 years from the completion or premature termination of the trial. The investigators should take measures to prevent accidental or premature destruction of these documents.

## 8.3 Confidentiality and coding

Trial and participant data will be handled with utmost discretion and is only accessible to authorised personnel who require the data to fulfil their duties within the scope of the study. On the CRFs and other study specific documents, participants are only identified by a unique participant number.

The investigator ensures anonymity of the patients; patients will not be identified by names in any documents. Signed informed consent forms and patient enrollment log will be kept strictly confidential to enable patient identification at the site.

## 8.4 Retention and destruction of study data

1  
2  
3 All study data are archived for 10 years after study termination or premature termination of the  
4 study.  
5

## 6 7 **9 MONITORING AND REGISTRATION**

8  
9  
10 For quality control of the study conduct and data retrieval, all study sites will be visited on-site by  
11 appropriately trained and qualified monitors. Any findings and comments will be documented in site visit  
12 reports and communicated to the local PI and to the sponsor as applicable. Investigators at the participating  
13 study sites will support the monitor in his/her activities. Prior to study start (first participant enrolled) a plan  
14 detailing all monitoring-related procedures will be developed.

15 All source data and relevant documents will be accessible to monitors and questions of monitors are  
16 answered during site visits.  
17

## 18 **10. FUNDING / PUBLICATION / DECLARATION OF INTEREST**

19  
20  
21 Debiopharm AG and Berger-Janser Stiftung support financially this clinical trial.

22 The results will be published in the name of the Hypo-FOCAL-SRT trial in a peer reviewed international  
23 journal on behalf of all collaborators. All presentations and publications, including abstracts, relating to the  
24 trial must be authorized by the Hypo-FOCAL-SRT trial steering committee (all co-investigators listed in the  
25 protocol). Participating centers should ask for the approval of the trial steering committee to use any data  
26 related to the patients registered in the trial.  
27

28 The investigators declare that they have no conflict of interest.  
29  
30  
31  
32  
33  
34  
35  
36  
37  
38  
39  
40  
41  
42  
43  
44  
45  
46  
47  
48  
49  
50  
51  
52  
53  
54  
55  
56  
57  
58  
59  
60

## **11 REFERENCES**

1. Hamdy FC, Donovan JL, Lane JA, et al. 10-Year Outcomes after Monitoring, Surgery, or Radiotherapy for Localized Prostate Cancer. *N Engl J Med*. 2016;375(15):1415-1424. doi:10.1056/NEJMoa1606220
2. Han M, Partin AW, Zahurak M, Piantadosi S, Epstein JI, Walsh PC. Biochemical (prostate specific antigen) recurrence probability following radical prostatectomy for clinically localized prostate cancer. *J Urol*. 2003;169(2):517-523. doi:10.1097/01.ju.0000045749.90353.c7
3. Gandaglia G, Briganti A, Clarke N, et al. Adjuvant and Salvage Radiotherapy after Radical Prostatectomy in Prostate Cancer Patients. *Eur Urol*. 2017;72(5):689-709. doi:10.1016/j.eururo.2017.01.039
4. Bolla M, Poppel H Van, Collette L, et al. Postoperative radiotherapy after radical prostatectomy: a randomised controlled trial (EORTC trial 22911). 2005;366:572-578.

- 1  
2  
3 5. Bolla M, van Poppel H, Tombal B, et al. Postoperative radiotherapy after radical  
4 prostatectomy for high-risk prostate cancer: long-term results of a randomised  
5 controlled trial (EORTC trial 22911). *Lancet (London, England)*.  
6  
7 2012;380(9858):2018-2027. doi:10.1016/S0140-6736(12)61253-7  
8  
9
- 10 6. Thompson IMJ, Tangen CM, Paradelo J, et al. Adjuvant radiotherapy for  
11 pathologically advanced prostate cancer: a randomized clinical trial. *JAMA*.  
12 2006;296(19):2329-2335. doi:10.1001/jama.296.19.2329  
13  
14
- 15 7. Thompson IM, Tangen CM, Paradelo J, et al. Adjuvant Radiotherapy for  
16 Pathological T3N0M0 Prostate Cancer Significantly Reduces Risk of Metastases  
17 and Improves Survival: Long-Term Followup of a Randomized Clinical Trial. *J*  
18 *Urol*. 2009;181(3):956-962. doi:10.1016/j.juro.2008.11.032  
19  
20
- 21 8. Wiegel T, Bottke D, Steiner U, et al. Phase III postoperative adjuvant radiotherapy  
22 after radical prostatectomy compared with radical prostatectomy alone in pT3  
23 prostate cancer with postoperative undetectable prostate-specific antigen: ARO  
24 96-02/AUO AP 09/95. *J Clin Oncol Off J Am Soc Clin Oncol*. 2009;27(18):2924-  
25 2930. doi:10.1200/JCO.2008.18.9563  
26  
27
- 28 9. Kneebone A, Fraser-Browne C, Duchesne GM, et al. Adjuvant radiotherapy  
29 versus early salvage radiotherapy following radical prostatectomy (TROG  
30 08.03/ANZUP RAVES): a randomised, controlled, phase 3, non-inferiority trial.  
31 *Lancet Oncol*. 2020;21(10):1331-1340. doi:10.1016/S1470-2045(20)30456-3  
32  
33
- 34 10. Parker CC, Clarke NW, Cook AD, et al. Timing of radiotherapy after radical  
35 prostatectomy (RADICALS-RT): a randomised, controlled phase 3 trial. *Lancet*  
36 *(London, England)*. 2020;396(10260):1413-1421. doi:10.1016/S0140-  
37 6736(20)31553-1  
38  
39
- 40 11. Sargos P, Chabaud S, Latorzeff I, et al. Adjuvant radiotherapy versus early  
41 salvage radiotherapy plus short-term androgen deprivation therapy in men with  
42 localised prostate cancer after radical prostatectomy (GETUG-AFU 17): a  
43 randomised, phase 3 trial. *Lancet Oncol*. 2020;21(10):1341-1352.  
44 doi:10.1016/S1470-2045(20)30454-X  
45  
46
- 47 12. Vale CL, Fisher D, Kneebone A, et al. Adjuvant or early salvage radiotherapy for  
48 the treatment of localised and locally advanced prostate cancer: a prospectively  
49 planned systematic review and meta-analysis of aggregate data. *Lancet (London,*  
50 *England)*. 2020;396(10260):1422-1431. doi:10.1016/S0140-6736(20)31952-8  
51  
52
- 53 13. Boike TP, Lotan Y, Cho LC, et al. Phase I dose-escalation study of stereotactic  
54  
55  
56  
57  
58  
59  
60



- body radiation therapy for low- and intermediate-risk prostate cancer. *J Clin Oncol Off J Am Soc Clin Oncol*. 2011;29(15):2020-2026.  
doi:10.1200/JCO.2010.31.4377
14. Brand DH, Tree AC, Ostler P, et al. Intensity-modulated fractionated radiotherapy versus stereotactic body radiotherapy for prostate cancer (PACE-B): acute toxicity findings from an international, randomised, open-label, phase 3, non-inferiority trial. *Lancet Oncol*. 2019;20(11):1531-1543. doi:10.1016/S1470-2045(19)30569-8
  15. Chen LN, Suy S, Uhm S, et al. Stereotactic body radiation therapy (SBRT) for clinically localized prostate cancer: the Georgetown University experience. *Radiat Oncol*. 2013;8:58. doi:10.1186/1748-717X-8-58
  16. Jackson WC, Silva J, Hartman HE, et al. Stereotactic Body Radiation Therapy for Localized Prostate Cancer : A Systematic Review and Meta-Analysis of Over 6 , 000 Patients Treated On Prospective Studies. *Radiat Oncol Biol*. 2019;104(4):778-789. doi:10.1016/j.ijrobp.2019.03.051
  17. King CR, Brooks JD, Gill H, Presti JCJ. Long-term outcomes from a prospective trial of stereotactic body radiotherapy for low-risk prostate cancer. *Int J Radiat Oncol Biol Phys*. 2012;82(2):877-882. doi:10.1016/j.ijrobp.2010.11.054
  18. Kotecha R, Djemil T, Tendulkar RD, et al. Dose-Escalated Stereotactic Body Radiation Therapy for Patients With Intermediate- and High-Risk Prostate Cancer: Initial Dosimetry Analysis and Patient Outcomes. *Int J Radiat Oncol Biol Phys*. 2016;95(3):960-964. doi:10.1016/j.ijrobp.2016.02.009
  19. Meier RM, Bloch DA, Cotrutz C, et al. Multicenter Trial of Stereotactic Body Radiation Therapy for Low- and Intermediate-Risk Prostate Cancer: Survival and Toxicity Endpoints. *Int J Radiat Oncol Biol Phys*. 2018;102(2):296-303. doi:10.1016/j.ijrobp.2018.05.040
  20. Zilli T, Franzese C, Bottero M, et al. Single fraction urethra-sparing prostate cancer SBRT: Phase I results of the ONE SHOT trial. *Radiother Oncol J Eur Soc Ther Radiol Oncol*. 2019;139:83-86. doi:10.1016/j.radonc.2019.07.018
  21. Bauman G, Ferguson M, Lock M, et al. A Phase 1/2 Trial of Brief Androgen Suppression and Stereotactic Radiation Therapy (FASTR) for High-Risk Prostate Cancer. *Int J Radiat Oncol Biol Phys*. 2015;92(4):856-862. doi:10.1016/j.ijrobp.2015.02.046
  22. Callan L, Bauman G, Chen J, et al. A Phase I/II Trial of Fairly Brief Androgen Suppression and Stereotactic Radiation Therapy for High-Risk Prostate Cancer

- (FASTR-2): Preliminary Results and Toxicity Analysis. *Adv Radiat Oncol*. 2019;4(4):668-673. doi:10.1016/j.adro.2019.07.007
23. Foerster R, Zwahlen DR, Buchali A, et al. Stereotactic Body Radiotherapy for High-Risk Prostate Cancer: A Systematic Review. *Cancers (Basel)*. 2021;13(4). doi:10.3390/cancers13040759
24. Murthy V, Gupta M, Mulye G, et al. Early Results of Extreme Hypofractionation Using Stereotactic Body Radiation Therapy for High-risk, Very High-risk and Node-positive Prostate Cancer. *Clin Oncol (R Coll Radiol)*. 2018;30(7):442-447. doi:10.1016/j.clon.2018.03.004
25. Widmark A, Gunnlaugsson A, Beckman L, et al. Ultra-hypofractionated versus conventionally fractionated radiotherapy for prostate cancer: 5-year outcomes of the HYPO-RT-PC randomised, non-inferiority, phase 3 trial. *Lancet (London, England)*. 2019;394(10196):385-395. doi:10.1016/S0140-6736(19)31131-6
26. Zilli T, Jorcano S, Bral S, et al. Once-a-week or every-other-day urethra-sparing prostate cancer stereotactic body radiotherapy, a randomized phase II trial: 18 months follow-up results. *Cancer Med*. 2020;9(9):3097-3106. doi:10.1002/cam4.2966
27. Brenner DJ, Martinez AA, Edmundson GK, Mitchell C, Thames HD, Armour EP. Direct evidence that prostate tumors show high sensitivity to fractionation (low alpha/beta ratio), similar to late-responding normal tissue. *Int J Radiat Oncol Biol Phys*. 2002;52(1):6-13. doi:10.1016/s0360-3016(01)02664-5
28. Miralbell R, Roberts SA, Zubizarreta E, Hendry JH. Dose-fractionation sensitivity of prostate cancer deduced from radiotherapy outcomes of 5,969 patients in seven international institutional datasets:  $\alpha/\beta = 1.4$  (0.9-2.2) Gy. *Int J Radiat Oncol Biol Phys*. 2012;82(1):e17-24. doi:10.1016/j.ijrobp.2010.10.075
29. Barra S, Belgioia L, Marcenaro M, et al. Moderate hypofractionated radiotherapy after prostatectomy for cancer patients: toxicity and clinical outcome. *Cancer Manag Res*. 2018;10:473-480. doi:10.2147/CMAR.S146131
30. Cozzarini C, Fiorino C, Deantoni C, et al. Higher-than-expected severe (Grade 3-4) late urinary toxicity after postprostatectomy hypofractionated radiotherapy: a single-institution analysis of 1176 patients. *Eur Urol*. 2014;66(6):1024-1030. doi:10.1016/j.eururo.2014.06.012
31. Cozzarini C, Fiorino C, Di Muzio N, et al. Hypofractionated adjuvant radiotherapy with helical tomotherapy after radical prostatectomy: planning data and toxicity



- 1  
2  
3 results of a Phase I-II study. *Radiother Oncol J Eur Soc Ther Radiol Oncol*.  
4 2008;88(1):26-33. doi:10.1016/j.radonc.2008.03.021  
5  
6 32. Fersino S, Tebano U, Mazzola R, et al. Moderate Hypofractionated  
7 Postprostatectomy Volumetric Modulated Arc Therapy With Daily Image  
8 Guidance (VMAT-IGRT): A Mono-institutional Report on Feasibility and Acute  
9 Toxicity. *Clin Genitourin Cancer*. 2017;15(4):e667-e673.  
10 doi:10.1016/j.clgc.2017.01.025  
11  
12 33. Ippolito E, Cellini N, Digesù C, et al. Postoperative intensity-modulated  
13 radiotherapy with simultaneous integrated boost in prostate cancer: a dose-  
14 escalation trial. *Urol Oncol*. 2013;31(1):87-92. doi:10.1016/j.urolonc.2010.10.005  
15  
16 34. Katayama S, Striecker T, Kessel K, et al. Hypofractionated IMRT of the prostate  
17 bed after radical prostatectomy: acute toxicity in the PRIAMOS-1 trial. *Int J*  
18 *Radiat Oncol Biol Phys*. 2014;90(4):926-933. doi:10.1016/j.ijrobp.2014.07.015  
19  
20 35. Krause S, Sterzing F, Neuhof D, Edler L, Debus J, Herfarth K. Hypofractionated  
21 helical intensity-modulated radiotherapy of the prostate bed after prostatectomy  
22 with or without the pelvic lymph nodes - the PRIAMOS trial. *BMC Cancer*.  
23 2012;12:504. doi:10.1186/1471-2407-12-504  
24  
25 36. Kruser TJ, Jarrard DF, Graf AK, et al. Early hypofractionated salvage  
26 radiotherapy for postprostatectomy biochemical recurrence. *Cancer*.  
27 2011;117(12):2629-2636. doi:10.1002/cncr.25824  
28  
29 37. Lewis SL, Patel P, Song H, et al. Image Guided Hypofractionated  
30 Postprostatectomy Intensity Modulated Radiation Therapy for Prostate Cancer.  
31 *Int J Radiat Oncol Biol Phys*. 2016;94(3):605-611.  
32 doi:10.1016/j.ijrobp.2015.11.025  
33  
34 38. Massacesi M, Cilla S, Deodato F, et al. Hypofractionated intensity-modulated  
35 radiotherapy with simultaneous integrated boost after radical prostatectomy:  
36 preliminary results of a phase II trial. *Anticancer Res*. 2013;33(6):2785-2789.  
37  
38 39. Arcangeli S, Gambardella P, Agolli L, et al. Stereotactic body radiation therapy  
39 salvage reirradiation of radiorecurrent prostatic carcinoma relapsed in the  
40 prostatic bed. *Tumori*. 2015;101(2):e57-9. doi:10.5301/tj.5000251  
41  
42 40. Ballas LK, Luo C, Chung E, et al. Phase 1 Trial of SBRT to the Prostate Fossa  
43 After Prostatectomy. *Int J Radiat Oncol Biol Phys*. 2019;104(1):50-60.  
44 doi:10.1016/j.ijrobp.2018.12.047  
45  
46 41. Caroli P, Colangione SP, De Giorgi U, et al. (68)Ga-PSMA-11 PET/CT-Guided  
47  
48  
49  
50  
51  
52  
53  
54  
55  
56  
57  
58  
59  
60

- 1  
2  
3 Stereotactic Body Radiation Therapy Retreatment in Prostate Cancer Patients  
4 with PSA Failure after Salvage Radiotherapy. *Biomedicines*. 2020;8(12).  
5 doi:10.3390/biomedicines8120536  
6  
7  
8 42. Detti B, Bonomo P, Masi L, et al. CyberKnife stereotactic radiotherapy for isolated  
9 recurrence in the prostatic bed. *World J Urol*. 2016;34(3):311-317.  
10 doi:10.1007/s00345-015-1613-5  
11  
12  
13 43. Francolini G, Jereczek-Fossa BA, Di Cataldo V, et al. Stereotactic radiotherapy  
14 for prostate bed recurrence after prostatectomy, a multicentric series. *BJU Int*.  
15 2020;125(3):417-425. doi:10.1111/bju.14924  
16  
17  
18 44. Jereczek-Fossa BA, Rojas DP, Zerini D, et al. Reirradiation for isolated local  
19 recurrence of prostate cancer: Mono-institutional series of 64 patients treated  
20 with salvage stereotactic body radiotherapy (SBRT). *Br J Radiol*.  
21 2019;92(1094):20180494. doi:10.1259/bjr.20180494  
22  
23  
24 45. Olivier J, Basson L, Puech P, et al. Stereotactic Re-irradiation for Local  
25 Recurrence in the Prostatic Bed After Prostatectomy: Preliminary Results. *Front*  
26 *Oncol*. 2019;9:71. doi:10.3389/fonc.2019.00071  
27  
28  
29 46. Sampath S, Frankel P, Vecchio B Del, et al. Stereotactic Body Radiation Therapy  
30 to the Prostate Bed: Results of a Phase 1 Dose-Escalation Trial. *Int J Radiat*  
31 *Oncol Biol Phys*. 2020;106(3):537-545. doi:10.1016/j.ijrobp.2019.11.005  
32  
33  
34 47. Scher N, Bauduceau O, Bollet M, et al. Stereotactic prostate focal reirradiation  
35 therapy for local recurrence: preliminary results of Hartmann Oncology  
36 Radiotherapy Group. *BJR open*. 2019;1(1):20180027. doi:10.1259/bjro.20180027  
37  
38  
39 48. Zerini D, Jereczek-Fossa BA, Fodor C, et al. Salvage image-guided intensity  
40 modulated or stereotactic body reirradiation of local recurrence of prostate  
41 cancer. *Br J Radiol*. 2015;88(1052):20150197. doi:10.1259/bjr.20150197  
42  
43  
44 49. Ferlay J, Soerjomataram I, Dikshit R, et al. Cancer incidence and mortality  
45 worldwide: sources, methods and major patterns in GLOBOCAN 2012. *Int J*  
46 *cancer*. 2015;136(5):E359-86. doi:10.1002/ijc.29210  
47  
48  
49 50. Cooperberg MR, Broering JM, Carroll PR. Time trends and local variation in  
50 primary treatment of localized prostate cancer. *J Clin Oncol Off J Am Soc Clin*  
51 *Oncol*. 2010;28(7):1117-1123. doi:10.1200/JCO.2009.26.0133  
52  
53  
54 51. Han M, Partin AW, Pound CR, Epstein JI, Walsh PC. Long-term biochemical  
55 disease-free and cancer-specific survival following anatomic radical retropubic  
56 prostatectomy. The 15-year Johns Hopkins experience. *Urol Clin North Am*.  
57  
58  
59  
60

- 1  
2  
3 2001;28(3):555-565. doi:10.1016/s0094-0143(05)70163-4  
4  
5 52. Chun FK-H, Graefen M, Zacharias M, et al. Anatomic radical retropubic  
6 prostatectomy-long-term recurrence-free survival rates for localized prostate  
7 cancer. *World J Urol.* 2006;24(3):273-280. doi:10.1007/s00345-006-0058-2  
8  
9  
10 53. Amling CL, Blute ML, Bergstralh EJ, Seay TM, Slezak J, Zincke H. Long-term  
11 hazard of progression after radical prostatectomy for clinically localized prostate  
12 cancer: continued risk of biochemical failure after 5 years. *J Urol.*  
13 2000;164(1):101-105.  
14  
15  
16 54. Bianco FJJ, Scardino PT, Eastham JA. Radical prostatectomy: long-term cancer  
17 control and recovery of sexual and urinary function ("trifecta"). *Urology.*  
18 2005;66(5 Suppl):83-94. doi:10.1016/j.urology.2005.06.116  
19  
20 55. Swanson GP, Hussey MA, Tangen CM, et al. Predominant treatment failure in  
21 postprostatectomy patients is local: analysis of patterns of treatment failure in  
22 SWOG 8794. *J Clin Oncol Off J Am Soc Clin Oncol.* 2007;25(16):2225-2229.  
23 doi:10.1200/JCO.2006.09.6495  
24  
25  
26 56. Pound CR, Partin AW, Eisenberger MA, Chan DW, Pearson JD, Walsh PC.  
27 Natural history of progression after PSA elevation following radical prostatectomy.  
28 *JAMA.* 1999;281(17):1591-1597. doi:10.1001/jama.281.17.1591  
29  
30 57. Thompson IM, Tangen CM, Paradelo J, et al. Adjuvant radiotherapy for  
31 pathological T3N0M0 prostate cancer significantly reduces risk of metastases  
32 and improves survival: long-term followup of a randomized clinical trial. *J Urol.*  
33 2009;181(3):956-962. doi:10.1016/j.juro.2008.11.032  
34  
35 58. Mahal BA, Hoffman KE, Efstathiou JA, Nguyen PL. National trends in the  
36 recommendation of radiotherapy after prostatectomy for prostate cancer before  
37 and after the reporting of a survival benefit in March 2009. *Clin Genitourin*  
38 *Cancer.* 2015;13(3):e167-72. doi:10.1016/j.clgc.2014.12.005  
39  
40 59. Fossati N, Karnes RJ, Cozzarini C, et al. Assessing the Optimal Timing for Early  
41 Salvage Radiation Therapy in Patients with Prostate-specific Antigen Rise After  
42 Radical Prostatectomy. *Eur Urol.* 2016;69(4):728-733.  
43 doi:10.1016/j.eururo.2015.10.009  
44  
45 60. Stephenson AJ, Scardino PT, Kattan MW, et al. Predicting the outcome of  
46 salvage radiation therapy for recurrent prostate cancer after radical  
47 prostatectomy. *J Clin Oncol Off J Am Soc Clin Oncol.* 2007;25(15):2035-2041.  
48 doi:10.1200/JCO.2006.08.9607  
49  
50  
51  
52  
53  
54  
55  
56  
57  
58  
59  
60

- 1  
2  
3 61. Tendulkar RD, Agrawal S, Gao T, et al. Contemporary Update of a Multi-  
4 Institutional Predictive Nomogram for Salvage Radiotherapy After Radical  
5 Prostatectomy. *J Clin Oncol Off J Am Soc Clin Oncol*. 2016;34(30):3648-3654.  
6 doi:10.1200/JCO.2016.67.9647  
7  
8
- 9  
10 62. Dal Pra A, Cury FL, Souhami L. Combining radiation therapy and androgen  
11 deprivation for localized prostate cancer-a critical review. *Curr Oncol*.  
12 2010;17(5):28-38. doi:10.3747/co.v17i5.632  
13  
14
- 15 63. Shipley WU, Seiferheld W, Lukka HR, et al. Radiation with or without  
16 Antiandrogen Therapy in Recurrent Prostate Cancer. *N Engl J Med*.  
17 2017;376(5):417-428. doi:10.1056/NEJMoa1607529  
18  
19
- 20 64. Carrie C, Magné N, Burban-Provost P, et al. Short-term androgen deprivation  
21 therapy combined with radiotherapy as salvage treatment after radical  
22 prostatectomy for prostate cancer (GETUG-AFU 16): a 112-month follow-up of a  
23 phase 3, randomised trial. *Lancet Oncol*. 2019;20(12):1740-1749.  
24 doi:10.1016/S1470-2045(19)30486-3  
25  
26  
27
- 28 65. Panebianco V, Villeirs G, Weinreb JC, et al. Prostate Magnetic Resonance  
29 Imaging for Local Recurrence Reporting (PI-RR): International Consensus -  
30 based Guidelines on Multiparametric Magnetic Resonance Imaging for Prostate  
31 Cancer Recurrence after Radiation Therapy and Radical Prostatectomy. *Eur Urol*  
32 *Oncol*. Published online February 2021. doi:10.1016/j.euo.2021.01.003  
33  
34  
35
- 36 66. De Visschere PJJ, Standaert C, Fütterer JJ, et al. A Systematic Review on the  
37 Role of Imaging in Early Recurrent Prostate Cancer. *Eur Urol Oncol*.  
38 2019;2(1):47-76. doi:10.1016/j.euo.2018.09.010  
39  
40  
41
- 42 67. Vargas HA, Wassberg C, Akin O, Hricak H. MR imaging of treated prostate  
43 cancer. *Radiology*. 2012;262(1):26-42. doi:10.1148/radiol.11101996  
44  
45
- 46 68. Barchetti F, Panebianco V. Multiparametric MRI for recurrent prostate cancer post  
47 radical prostatectomy and postradiation therapy. *Biomed Res Int*.  
48 2014;2014:316272. doi:10.1155/2014/316272  
49  
50
- 51 69. Rouvière O, Vitry T, Lyonnet D. Imaging of prostate cancer local recurrences: why  
52 and how? *Eur Radiol*. 2010;20(5):1254-1266. doi:10.1007/s00330-009-1647-4  
53  
54
- 55 70. Casciani E, Polettini E, Carmenini E, et al. Endorectal and dynamic contrast-  
56 enhanced MRI for detection of local recurrence after radical prostatectomy. *AJR*  
57 *Am J Roentgenol*. 2008;190(5):1187-1192. doi:10.2214/AJR.07.3032  
58  
59
- 60 71. Panebianco V, Barchetti F, Sciarra A, et al. Prostate cancer recurrence after

- radical prostatectomy: the role of 3-T diffusion imaging in multi-parametric magnetic resonance imaging. *Eur Radiol.* 2013;23(6):1745-1752.  
doi:10.1007/s00330-013-2768-3
72. Kitajima K, Hartman RP, Froemming AT, Hagen CE, Takahashi N, Kawashima A. Detection of Local Recurrence of Prostate Cancer After Radical Prostatectomy Using Endorectal Coil MRI at 3 T: Addition of DWI and Dynamic Contrast Enhancement to T2-Weighted MRI. *AJR Am J Roentgenol.* 2015;205(4):807-816. doi:10.2214/AJR.14.14275
73. Litwin MS, Tan H-J. The Diagnosis and Treatment of Prostate Cancer: A Review. *JAMA.* 2017;317(24):2532-2542. doi:10.1001/jama.2017.7248
74. Wiegel T, Lohm G, Bottke D, et al. Achieving an undetectable PSA after radiotherapy for biochemical progression after radical prostatectomy is an independent predictor of biochemical outcome--results of a retrospective study. *Int J Radiat Oncol Biol Phys.* 2009;73(4):1009-1016. doi:10.1016/j.ijrobp.2008.06.1922
75. Bottke D, Bartkowiak D, Siegmann A, et al. Effect of early salvage radiotherapy at PSA < 0.5 ng/ml and impact of post-SRT PSA nadir in post-prostatectomy recurrent prostate cancer. *Prostate Cancer Prostatic Dis.* 2019;22(2):344-349. doi:10.1038/s41391-018-0112-3
76. Ghosh A, Heston WDW. Tumor target prostate specific membrane antigen (PSMA) and its regulation in prostate cancer. *J Cell Biochem.* 2004;91(3):528-539. doi:10.1002/jcb.10661
77. Eiber M, Maurer T, Souvatzoglou M, et al. Evaluation of Hybrid <sup>68</sup>Ga-PSMA Ligand PET/CT in 248 Patients with Biochemical Recurrence After Radical Prostatectomy. *J Nucl Med.* 2015;56(5):668-674. doi:10.2967/jnumed.115.154153
78. Afshar-Oromieh A, Holland-Letz T, Giesel FL, et al. Diagnostic performance of (68)Ga-PSMA-11 (HBED-CC) PET/CT in patients with recurrent prostate cancer: evaluation in 1007 patients. *Eur J Nucl Med Mol Imaging.* 2017;44(8):1258-1268. doi:10.1007/s00259-017-3711-7
79. Miksch J, Bottke D, Krohn T, et al. Interobserver variability, detection rate, and lesion patterns of (68)Ga-PSMA-11-PET/CT in early-stage biochemical recurrence of prostate cancer after radical prostatectomy. *Eur J Nucl Med Mol Imaging.* 2020;47(10):2339-2347. doi:10.1007/s00259-020-04718-w
80. Bluemel C, Krebs M, Polat B, et al. 68Ga-PSMA-PET/CT in Patients With



- Biochemical Prostate Cancer Recurrence and Negative 18F-Choline-PET/CT. *Clin Nucl Med*. 2016;41(7):515-521. doi:10.1097/RLU.0000000000001197
81. Cirillo S, Petracchini M, Scotti L, et al. Endorectal magnetic resonance imaging at 1.5 Tesla to assess local recurrence following radical prostatectomy using T2-weighted and contrast-enhanced imaging. *Eur Radiol*. 2009;19(3):761-769. doi:10.1007/s00330-008-1174-8
82. Fendler WP, Eiber M, Beheshti M, et al. (68)Ga-PSMA PET/CT: Joint EANM and SNMMI procedure guideline for prostate cancer imaging: version 1.0. *Eur J Nucl Med Mol Imaging*. 2017;44(6):1014-1024. doi:10.1007/s00259-017-3670-z
83. Fowler JF. The radiobiology of prostate cancer including new aspects of fractionated radiotherapy. *Acta Oncol*. 2005;44(3):265-276. doi:10.1080/02841860410002824
84. Morgan SC, Hoffman K, Loblaw DA, et al. Hypofractionated Radiation Therapy for Localized Prostate Cancer: An ASTRO, ASCO, and AUA Evidence-Based Guideline. *J Urol*. Published online October 2018. doi:10.1016/j.juro.2018.10.001
85. Hickey BE, James ML, Daly T, Soh F-Y, Jeffery M. Hypofractionation for clinically localized prostate cancer. *Cochrane database Syst Rev*. 2019;9(9):CD011462. doi:10.1002/14651858.CD011462.pub2
86. Jackson WC, Silva J, Hartman HE, et al. Stereotactic Body Radiation Therapy for Localized Prostate Cancer: A Systematic Review and Meta-Analysis of Over 6,000 Patients Treated On Prospective Studies. *Int J Radiat Oncol Biol Phys*. 2019;104(4):778-789. doi:10.1016/j.ijrobp.2019.03.051
87. Brand DH, Tree AC, Ostler P, et al. Intensity-modulated fractionated radiotherapy versus stereotactic body radiotherapy for prostate cancer (PACE-B): acute toxicity findings from an international, randomised, open-label, phase 3, non-inferiority trial. *Lancet Oncol*. 2019;20(11):1531-1543. doi:10.1016/S1470-2045(19)30569-8
88. Wolf F, Sedlmayer F, Aebbersold D, et al. Ultrahypofractionation of localized prostate cancer : Statement from the DEGRO working group prostate cancer. *Strahlenther Onkol*. 2021;197(2):89-96. doi:10.1007/s00066-020-01723-8
89. Lehrer EJ, Kishan AU, Yu JB, et al. Ultrahypofractionated versus hypofractionated and conventionally fractionated radiation therapy for localized prostate cancer: A systematic review and meta-analysis of phase III randomized trials. *Radiother Oncol J Eur Soc Ther Radiol Oncol*. 2020;148:235-242.

doi:10.1016/j.radonc.2020.04.037

90. Trial D, Sampath S, Frankel P, et al. Stereotactic Body Radiation Therapy to the Prostate Bed : Results of a Phase 1. *Radiat Oncol Biol*. 2020;106(3):537-545.

doi:10.1016/j.ijrobp.2019.11.005

91. Francolini G, Alicja B, Fossa J, et al. Stereotactic or conventional radiotherapy for macroscopic prostate bed recurrence : a propensity score analysis. *Radiol Med*. 2022;(0123456789). doi:10.1007/s11547-022-01465-w

## 12 APPENDICES

### Appendix 1 TNM Classification according to UICC 2009

#### T - Primary tumor

*pT: pathological tumor classification*

Tx Primary tumor cannot be assessed

T0 No evidence of primary tumor

T1 Clinically unapparent tumor not palpable or visible by imaging

T1a Tumor incidental histological finding in 5% or less of tissue resected

T1b Tumor incidental histological finding in more than 5% of tissue resected

T1c Tumor identified by needle biopsy (e.g., because of elevated PSA)

T2 Tumor confined within the prostate

T2a Tumor involves one half of one lobe or less

T2b Tumor involves more than one half of one lobe but not both lobes

T2c Tumor involves both lobes

T3 Tumor extends through the prostate capsule

T3a Extracapsular extension (unilateral or bilateral) including microscopic bladder neck involvement

T3b Tumor invades seminal vesicle(s)

T4 Tumor is fixed or invades adjacent structures other than seminal vesicles: external sphincter, rectum, levator muscles, and/or pelvic wall

#### N - Regional lymph nodes

*cN: clinical regional lymph node classification*

*pN: pathological regional lymph node classification*

Nx Regional lymph nodes cannot be assessed

N0 No regional lymph node metastasis

N1 Regional lymph node metastasis

#### M - Distant metastases

Mx Distant metastasis cannot be assessed

M0 No distant metastasis

M1 Distant metastasis

M1a Nonregional lymph node(s)

M1b Bone(s)

M1c Other site(s)

## Appendix 2 Pre-registration imaging (PSMA PET CT):

For the detection of local recurrence using hybrid imaging several, PSMA-tracers are clinically available, such as  $^{68}\text{Ga}$ -PSMA-11,  $^{18}\text{F}$ -PSMA-1007, and  $^{18}\text{F}$ -DCFPYL (Pylarify - piflufolastat F 18). Imaging is usually performed as a whole-body PET/CT for the detection of local recurrence and distant metastases.

Imaging protocol should contain:

- The radiochemical purity of the radiotracer should be greater than or equal to 95% in high performance liquid chromatography (HPLC) and Thin Layer Chromatography (TLC)
- Free  $^{18}\text{F}$ -fluoride or  $^{68}\text{Ga}$ -eluate should be the major impurity.
- i.v. application of the radiotracer is beneficial
- regarding the specific tracer a tracer-individual uptake period from application to imaging is recommended:
  - o 60 min p.i. for  $^{68}\text{Ga}$ -PSMA-11
  - o 90-120 min p.i. for  $^{18}\text{F}$ -PSMA-1007
  - o 60 min p.i. for  $^{18}\text{F}$ -DCFPYL
- PET scans should be acquired in the 3D mode
  - o with an acquisition time of 1.5 min/bed position
  - o by continues bed movement or
  - o using a whole-body PET/CT scanner.
- Emission data using bed position PET/CT scanners should be corrected for scatter and attenuation and reconstructed iteratively with an OSEM algorithm (2 iterations and 21 subsets) followed by a postreconstruction smoothing gaussian filter.
- Whole body PET images at Inselspital Bern using the Siemens Quadra or Siemens Biograph Vision 600 will be reconstructed with the same reconstruction parameters for both systems in 3D with a zoom factor of 1.0. Emission data need to be corrected for randoms, scatter and decay, and reconstruction with the vendor's time of flight (TOF) point-spread-function (PSF) algorithm with 4 iterations and 5 subsets.

Image interpretation: Focal uptake of  $^{68}\text{Ga}$ -PSMA-11,  $^{18}\text{F}$ -PSMA-1007, and  $^{18}\text{F}$ -DCFPYL higher than the surrounding background and not associated with physiologic uptake is considered suggestive of malignancy. Typical pitfalls in PSMA ligand PET imaging need to be known (e.g., celiac and other ganglia for  $^{18}\text{F}$ -PSMA-1007, fractures and degenerative changes for all fluorinated radiotracers, and perfusion effects in inflammatory lymph nodes for all tracers).



### Appendix 3 Pre-treatment imaging (mpMRI)

In order to define the extension of macroscopic local recurrence, a mpMRI of the pelvis with i.v. Gadolinium is mandatory after biochemical progression upon RP

MRI should preferably be performed on a 3T MR unit; if not available a 1.5T MR unit can also be accepted. There is no need for an endorectal coil. MRI should cover the entire pelvis from the aortic bifurcation to the inferior border of the pubic symphysis. Ideally, air in the rectum should be minimized by emptying the rectum by applying local guidelines. The following sequences should be performed:

- Coronal T2-weighted sequence with isotropic voxels (1mm) covering the entire pelvis allowing reconstruction in the axial and sagittal plane.
- Axial T2-weighted high resolution covering the former prostatic bed including seminal vesicles (3mm slice thickness, no gap)
- Dynamic axial T1-weighted sequence (Dotarem®) including prostatic bed and seminal vesicles with high spatial resolution and slice thickness of 3mm.
- A T1-weighted sequence before administration of Gadolinium has to be added.
- Diffusion-weighted MRI (DW-MRI) in the axial plane covering the entire pelvis with slice thickness of 4mm and b-values of 0, 500 and 1000 sec/mm<sup>2</sup> in order to detect lymph node metastases and local recurrence.
- Diffusion-weighted MRI (Zoomit) with limited field of view (former prostate and seminal vesicle bed) and b-values of 0, 500, 1000 and 2000 sec/mm<sup>2</sup>.
- Axial T1-weighted fat saturated sequence covering the entire pelvis (4mm slice thickness).

Image interpretation: Local recurrence is defined as the following: soft tissue mass on T1- and T2-weighted sequences with early contrast medium enhancement on DCE-MRI. DW-MRI is analyzed qualitatively: tumor recurrence shows a high signal intensity focal lesion on the high b-value image corresponding to a low signal intensity lesion on the corresponding Apparent Diffusion Coefficient (ADC) map (impeded diffusion due to high cellularity).

## SPIRIT Checklist for *Trials*

Complete this checklist by entering the page and line numbers where each of the items listed below can be found in your manuscript.

Your manuscript may not currently address all the items on the checklist. Please modify your text to include the missing information. If you are certain that an item does not apply, please state "n/a" and provide a short explanation. **Leaving an item blank or stating "n/a" without an explanation will lead to your manuscript being returned before review.**

Upload your completed checklist as an additional file when you submit to *Trials*. You must reference this additional file in the main text of your protocol submission. The completed SPIRIT figure must be included within the main body of the protocol text and can be downloaded here: <http://www.spirit-statement.org/schedule-of-enrolment-interventions-and-assessments/>

In your methods section, please state that you used the SPIRIT reporting guidelines, and cite them as:

Chan A-W, Tetzlaff JM, Gøtzsche PC, Altman DG, Mann H, Berlin J, Dickersin K, Hróbjartsson A, Schulz KF, Parulekar WR, Krleža-Jerić K, Laupacis A, Moher D. SPIRIT 2013 Explanation and Elaboration: Guidance for protocols of clinical trials. *BMJ*. 2013;346:e7586

|                                   | Reporting Item      |                                                                                                              | Page and Line Number | Reason if not applicable |
|-----------------------------------|---------------------|--------------------------------------------------------------------------------------------------------------|----------------------|--------------------------|
| <b>Administrative information</b> |                     |                                                                                                              |                      |                          |
| Title                             | <a href="#">#1</a>  | Descriptive title identifying the study design, population, interventions, and, if applicable, trial acronym | 1: 1-3               |                          |
| Trial registration                | <a href="#">#2a</a> | Trial identifier and registry name. If not yet registered, name of intended registry                         | 4: 86-87             |                          |
| Trial registration: data set      | <a href="#">#2b</a> | All items from the World Health Organization Trial Registration Data Set                                     | 4: 86-87             |                          |
| Protocol version                  | <a href="#">#3</a>  | Date and version identifier                                                                                  | 4: 88-89             |                          |

|                                                          |                                                         |                     |                                                                                                                                                                                                                                                                                          |             |  |
|----------------------------------------------------------|---------------------------------------------------------|---------------------|------------------------------------------------------------------------------------------------------------------------------------------------------------------------------------------------------------------------------------------------------------------------------------------|-------------|--|
| 1<br>2<br>3                                              | Funding                                                 | <a href="#">#4</a>  | Sources and types of financial, material, and other support                                                                                                                                                                                                                              | 19: 393-400 |  |
| 4<br>5<br>6<br>7<br>8                                    | Roles and responsibilities: contributorship             | <a href="#">#5a</a> | Names, affiliations, and roles of protocol contributors                                                                                                                                                                                                                                  | 19: 389-392 |  |
| 9<br>10<br>11<br>12<br>13                                | Roles and responsibilities: sponsor contact information | <a href="#">#5b</a> | Name and contact information for the trial sponsor                                                                                                                                                                                                                                       | 19: 389-392 |  |
| 14<br>15<br>16<br>17<br>18<br>19<br>20<br>21<br>22<br>23 | Roles and responsibilities: sponsor and funder          | <a href="#">#5c</a> | Role of study sponsor and funders, if any, in study design; collection, management, analysis, and interpretation of data; writing of the report; and the decision to submit the report for publication, including whether they will have ultimate authority over any of these activities | 19: 389-392 |  |
| 24<br>25<br>26<br>27<br>28<br>29<br>30<br>31<br>32<br>33 | Roles and responsibilities: committees                  | <a href="#">#5d</a> | Composition, roles, and responsibilities of the coordinating centre, steering committee, endpoint adjudication committee, data management team, and other individuals or groups overseeing the trial, if applicable (see Item 21a for data monitoring committee)                         | 19: 389-392 |  |
| 34<br>35                                                 | <b>Introduction</b>                                     |                     |                                                                                                                                                                                                                                                                                          | 3: 52-82    |  |
| 36<br>37<br>38<br>39<br>40<br>41<br>42<br>43<br>44       | Background and rationale                                | <a href="#">#6a</a> | Description of research question and justification for undertaking the trial, including summary of relevant studies (published and unpublished) examining benefits and harms for each intervention                                                                                       | 3: 52-82    |  |

|                                              |                                                           |                      |                                                                                                                                                                                                            |               |  |
|----------------------------------------------|-----------------------------------------------------------|----------------------|------------------------------------------------------------------------------------------------------------------------------------------------------------------------------------------------------------|---------------|--|
| 1<br>2<br>3<br>4<br>5                        | Background and rationale: choice of comparators           | <a href="#">#6b</a>  | Explanation for choice of comparators                                                                                                                                                                      | 3: 52-82      |  |
| 6<br>7                                       | Objectives                                                | <a href="#">#7</a>   | Specific objectives or hypotheses                                                                                                                                                                          | 3: 52-82      |  |
| 8<br>9<br>10<br>11<br>12<br>13<br>14<br>15   | Trial design                                              | <a href="#">#8</a>   | Description of trial design including type of trial (eg, parallel group, crossover, factorial, single group), allocation ratio, and framework (eg, superiority, equivalence, non-inferiority, exploratory) | 3: 80 -82     |  |
| 16                                           | <b>Methods: Participants, interventions, and outcomes</b> |                      |                                                                                                                                                                                                            |               |  |
| 17<br>18<br>19<br>20<br>21<br>22<br>23<br>24 | Study setting                                             | <a href="#">#9</a>   | Description of study settings (eg, community clinic, academic hospital) and list of countries where data will be collected. Reference to where list of study sites can be obtained                         | 4: 86-91      |  |
| 25<br>26<br>27<br>28<br>29<br>30<br>31       | Eligibility criteria                                      | <a href="#">#10</a>  | Inclusion and exclusion criteria for participants. If applicable, eligibility criteria for study centres and individuals who will perform the interventions (eg, surgeons, psychotherapists)               | 4, 5: 92-130  |  |
| 32<br>33<br>34<br>35<br>36                   | Interventions: description                                | <a href="#">#11a</a> | Interventions for each group with sufficient detail to allow replication, including how and when they will be administered                                                                                 | 7-11: 178-286 |  |
| 37<br>38<br>39<br>40<br>41<br>42<br>43       | Interventions: modifications                              | <a href="#">#11b</a> | Criteria for discontinuing or modifying allocated interventions for a given trial participant (eg, drug dose change in response to harms, participant request, or improving / worsening disease)           | 7-11: 178-286 |  |

1  
2  
3  
4  
5  
6  
7  
8  
9  
10  
11  
12  
13  
14  
15  
16  
17  
18  
19  
20  
21  
22  
23  
24  
25  
26  
27  
28  
29  
30  
31  
32  
33  
34  
35  
36  
37  
38  
39  
40  
41  
42  
43  
44  
45  
46  
47

|                                                                      |                                 |                      |                                                                                                                                                                                                                                                                                                                                                                                |               |  |
|----------------------------------------------------------------------|---------------------------------|----------------------|--------------------------------------------------------------------------------------------------------------------------------------------------------------------------------------------------------------------------------------------------------------------------------------------------------------------------------------------------------------------------------|---------------|--|
| 1<br>2<br>3<br>4<br>5<br>6                                           | Interventions: adherence        | <a href="#">#11c</a> | Strategies to improve adherence to intervention protocols, and any procedures for monitoring adherence (eg, drug tablet return; laboratory tests)                                                                                                                                                                                                                              | 7-11: 178-286 |  |
| 7<br>8<br>9<br>10                                                    | Interventions: concomitant care | <a href="#">#11d</a> | Relevant concomitant care and interventions that are permitted or prohibited during the trial                                                                                                                                                                                                                                                                                  | 7-11: 178-286 |  |
| 11<br>12<br>13<br>14<br>15<br>16<br>17<br>18<br>19<br>20<br>21<br>22 | Outcomes                        | <a href="#">#12</a>  | Primary, secondary, and other outcomes, including the specific measurement variable (eg, systolic blood pressure), analysis metric (eg, change from baseline, final value, time to event), method of aggregation (eg, median, proportion), and time point for each outcome. Explanation of the clinical relevance of chosen efficacy and harm outcomes is strongly recommended | 7: 169: 177   |  |
| 23<br>24<br>25<br>26<br>27<br>28<br>29<br>30                         | Participant timeline            | <a href="#">#13</a>  | Time schedule of enrolment, interventions (including any run-ins and washouts), assessments, and visits for participants. A schematic diagram is highly recommended (see Figure)                                                                                                                                                                                               | 6: 151-163    |  |
| 31<br>32<br>33<br>34<br>35<br>36<br>37<br>38                         | Sample size                     | <a href="#">#14</a>  | Estimated number of participants needed to achieve study objectives and how it was determined, including clinical and statistical assumptions supporting any sample size calculations                                                                                                                                                                                          | 6: 151-163    |  |
| 39<br>40<br>41<br>42<br>43                                           | Recruitment                     | <a href="#">#15</a>  | Strategies for achieving adequate participant enrolment to reach target sample size                                                                                                                                                                                                                                                                                            | 6, 6: 131-149 |  |

| <b>Methods: Assignment of interventions (for controlled trials)</b> |                      |                                                                                                                                                                                                                                                                                                                                                          |     |                      |
|---------------------------------------------------------------------|----------------------|----------------------------------------------------------------------------------------------------------------------------------------------------------------------------------------------------------------------------------------------------------------------------------------------------------------------------------------------------------|-----|----------------------|
| Allocation: sequence generation                                     | <a href="#">#16a</a> | Method of generating the allocation sequence (eg, computer-generated random numbers), and list of any factors for stratification. To reduce predictability of a random sequence, details of any planned restriction (eg, blocking) should be provided in a separate document that is unavailable to those who enrol participants or assign interventions | N/A | Not controlled trial |
| Allocation concealment mechanism                                    | <a href="#">#16b</a> | Mechanism of implementing the allocation sequence (eg, central telephone; sequentially numbered, opaque, sealed envelopes), describing any steps to conceal the sequence until interventions are assigned                                                                                                                                                | N/A | Not controlled trial |
| Allocation: implementation                                          | <a href="#">#16c</a> | Who will generate the allocation sequence, who will enrol participants, and who will assign participants to interventions                                                                                                                                                                                                                                | N/A | Not controlled trial |
| Blinding (masking)                                                  | <a href="#">#17a</a> | Who will be blinded after assignment to interventions (eg, trial participants, care providers, outcome assessors, data analysts), and how                                                                                                                                                                                                                | N/A | Not controlled trial |
| Blinding (masking): emergency unblinding                            | <a href="#">#17b</a> | If blinded, circumstances under which unblinding is permissible, and procedure for revealing a participant's allocated intervention during the trial                                                                                                                                                                                                     | N/A | Not controlled trial |
| <b>Methods: Data collection, management, and analysis</b>           |                      |                                                                                                                                                                                                                                                                                                                                                          |     |                      |

|                                                                   |                                 |                      |                                                                                                                                                                                                                                                                                                                                                                                                              |               |  |
|-------------------------------------------------------------------|---------------------------------|----------------------|--------------------------------------------------------------------------------------------------------------------------------------------------------------------------------------------------------------------------------------------------------------------------------------------------------------------------------------------------------------------------------------------------------------|---------------|--|
| 1<br>2<br>3<br>4<br>5<br>6<br>7<br>8<br>9<br>10<br>11<br>12<br>13 | Data collection plan            | <a href="#">#18a</a> | Plans for assessment and collection of outcome, baseline, and other trial data, including any related processes to promote data quality (eg, duplicate measurements, training of assessors) and a description of study instruments (eg, questionnaires, laboratory tests) along with their reliability and validity, if known. Reference to where data collection forms can be found, if not in the protocol | 5, 6: 131-149 |  |
| 14<br>15<br>16<br>17<br>18<br>19<br>20<br>21<br>22                | Data collection plan: retention | <a href="#">#18b</a> | Plans to promote participant retention and complete follow-up, including list of any outcome data to be collected for participants who discontinue or deviate from intervention protocols                                                                                                                                                                                                                    | 5, 6: 131-149 |  |
| 23<br>24<br>25<br>26<br>27<br>28<br>29<br>30<br>31                | Data management                 | <a href="#">#19</a>  | Plans for data entry, coding, security, and storage, including any related processes to promote data quality (eg, double data entry; range checks for data values). Reference to where details of data management procedures can be found, if not in the protocol                                                                                                                                            | 13: 290-303   |  |
| 32<br>33<br>34<br>35<br>36<br>37<br>38                            | Statistics: outcomes            | <a href="#">#20a</a> | Statistical methods for analysing primary and secondary outcomes. Reference to where other details of the statistical analysis plan can be found, if not in the protocol                                                                                                                                                                                                                                     | 13: 290-303   |  |
| 39<br>40<br>41<br>42                                              | Statistics: additional analyses | <a href="#">#20b</a> | Methods for any additional analyses (eg, subgroup and adjusted analyses)                                                                                                                                                                                                                                                                                                                                     | 13: 290-303   |  |



|                                                                      |                                                  |                      |                                                                                                                                                                                                                                                                                                                                       |             |                     |
|----------------------------------------------------------------------|--------------------------------------------------|----------------------|---------------------------------------------------------------------------------------------------------------------------------------------------------------------------------------------------------------------------------------------------------------------------------------------------------------------------------------|-------------|---------------------|
| 1<br>2<br>3<br>4<br>5<br>6                                           | Statistics: analysis population and missing data | <a href="#">#20c</a> | Definition of analysis population relating to protocol non-adherence (eg, as randomised analysis), and any statistical methods to handle missing data (eg, multiple imputation)                                                                                                                                                       | 13: 305-310 |                     |
| 7<br>8<br>9                                                          | <b>Methods: Monitoring</b>                       |                      |                                                                                                                                                                                                                                                                                                                                       |             |                     |
| 10<br>11<br>12<br>13<br>14<br>15<br>16<br>17<br>18<br>19<br>20<br>21 | Data monitoring: formal committee                | <a href="#">#21a</a> | Composition of data monitoring committee (DMC); summary of its role and reporting structure; statement of whether it is independent from the sponsor and competing interests; and reference to where further details about its charter can be found, if not in the protocol. Alternatively, an explanation of why a DMC is not needed | 5: 131-149  |                     |
| 22<br>23<br>24<br>25<br>26<br>27<br>28                               | Data monitoring: interim analysis                | <a href="#">#21b</a> | Description of any interim analyses and stopping guidelines, including who will have access to these interim results and make the final decision to terminate the trial                                                                                                                                                               | N/A         | No interim analysis |
| 29<br>30<br>31<br>32<br>33<br>34                                     | Harms                                            | <a href="#">#22</a>  | Plans for collecting, assessing, reporting, and managing solicited and spontaneously reported adverse events and other unintended effects of trial interventions or trial conduct                                                                                                                                                     | 7: 173      |                     |
| 35<br>36<br>37<br>38<br>39<br>40                                     | Auditing                                         | <a href="#">#23</a>  | Frequency and procedures for auditing trial conduct, if any, and whether the process will be independent from investigators and the sponsor                                                                                                                                                                                           | N/A         | No auditing         |
| 41<br>42<br>43<br>44<br>45<br>46<br>47                               | <b>Ethics and dissemination</b>                  |                      |                                                                                                                                                                                                                                                                                                                                       |             |                     |

|                                                                            |                                      |                      |                                                                                                                                                                                                                                    |               |                                |
|----------------------------------------------------------------------------|--------------------------------------|----------------------|------------------------------------------------------------------------------------------------------------------------------------------------------------------------------------------------------------------------------------|---------------|--------------------------------|
| 1<br>2<br>3                                                                | Research ethics approval             | <a href="#">#24</a>  | Plans for seeking research ethics committee / institutional review board (REC / IRB) approval                                                                                                                                      | 4: 86-91      |                                |
| 4<br>5<br>6<br>7<br>8<br>9<br>10<br>11                                     | Protocol amendments                  | <a href="#">#25</a>  | Plans for communicating important protocol modifications (eg, changes to eligibility criteria, outcomes, analyses) to relevant parties (eg, investigators, REC / IRBs, trial participants, trial registries, journals, regulators) | 4: 86-91      |                                |
| 12<br>13<br>14<br>15<br>16<br>17                                           | Consent or assent                    | <a href="#">#26a</a> | Who will obtain informed consent or assent from potential trial participants or authorised surrogates, and how (see Item 32)                                                                                                       | 4: 94-95      |                                |
| 18<br>19<br>20<br>21<br>22                                                 | Consent or assent: ancillary studies | <a href="#">#26b</a> | Additional consent provisions for collection and use of participant data and biological specimens in ancillary studies, if applicable                                                                                              | N/A           | This is not an ancillary study |
| 23<br>24<br>25<br>26<br>27<br>28<br>29                                     | Confidentiality                      | <a href="#">#27</a>  | How personal information about potential and enrolled participants will be collected, shared, and maintained in order to protect confidentiality before, during, and after the trial                                               | 5, 6: 131-149 |                                |
| 30<br>31<br>32<br>33<br>34                                                 | Declaration of interests             | <a href="#">#28</a>  | Financial and other competing interests for principal investigators for the overall trial and each study site                                                                                                                      | 19: 387-390   |                                |
| 35<br>36<br>37<br>38<br>39<br>40<br>41<br>42<br>43<br>44<br>45<br>46<br>47 | Data access                          | <a href="#">#29</a>  | Statement of who will have access to the final trial dataset, and disclosure of contractual agreements that limit such access for investigators                                                                                    | 5, 6: 131-149 |                                |

|                                                            |                                             |                      |                                                                                                                                                                                                                                                                                     |             |                                       |
|------------------------------------------------------------|---------------------------------------------|----------------------|-------------------------------------------------------------------------------------------------------------------------------------------------------------------------------------------------------------------------------------------------------------------------------------|-------------|---------------------------------------|
| 1<br>2<br>3<br>4<br>5                                      | Ancillary and post trial care               | <a href="#">#30</a>  | Provisions, if any, for ancillary and post-trial care, and for compensation to those who suffer harm from trial participation                                                                                                                                                       | 6: 159-163  |                                       |
| 6<br>7<br>8<br>9<br>10<br>11<br>12<br>13<br>14<br>15<br>16 | Dissemination policy: trial results         | <a href="#">#31a</a> | Plans for investigators and sponsor to communicate trial results to participants, healthcare professionals, the public, and other relevant groups (eg, via publication, reporting in results databases, or other data sharing arrangements), including any publication restrictions | 19: 393-400 |                                       |
| 17<br>18<br>19<br>20                                       | Dissemination policy: authorship            | <a href="#">#31b</a> | Authorship eligibility guidelines and any intended use of professional writers                                                                                                                                                                                                      | 19: 393-400 |                                       |
| 21<br>22<br>23<br>24<br>25                                 | Dissemination policy: reproducible research | <a href="#">#31c</a> | Plans, if any, for granting public access to the full protocol, participant-level dataset, and statistical code                                                                                                                                                                     | N/A         | No public access to the full protocol |
| 26<br>27                                                   | <b>Appendices</b>                           |                      |                                                                                                                                                                                                                                                                                     |             |                                       |
| 28<br>29<br>30<br>31<br>32                                 | Informed consent materials                  | <a href="#">#32</a>  | Model consent form and other related documentation given to participants and authorised surrogates                                                                                                                                                                                  | 19: 404-407 |                                       |
| 33<br>34<br>35<br>36<br>37<br>38<br>39                     | Biological specimens                        | <a href="#">#33</a>  | Plans for collection, laboratory evaluation, and storage of biological specimens for genetic or molecular analysis in the current trial and for future use in ancillary studies, if applicable                                                                                      | N/A         | This is not an ancillary study        |

It is strongly recommended that this checklist be read in conjunction with the SPIRIT 2013 Explanation & Elaboration for important clarification on the items. Amendments to the protocol should be tracked and dated. The SPIRIT checklist is copyrighted by the SPIRIT Group under the Creative Commons "[Attribution-](#)

40  
41  
42  
43  
44  
45  
46  
47

1 [NonCommercial-NoDerivs 3.0 Unported](#) license. This checklist can be completed online using <https://www.goodreports.org/>, a tool made by the EQUATOR  
2 Network in collaboration with Penelope.ai  
3  
4  
5  
6  
7  
8  
9  
10  
11  
12  
13  
14  
15  
16  
17  
18  
19  
20  
21  
22  
23  
24  
25  
26  
27  
28  
29  
30  
31  
32  
33  
34  
35  
36  
37  
38  
39  
40  
41  
42  
43  
44  
45  
46  
47

For peer review only

# BMJ Open

## HypoFocal SRT Trial: Ultra-hypo fractionated focal salvage radiotherapy for isolated prostate bed recurrence after radical prostatectomy - Single-arm phase II Study - Clinical Trial Protocol.

|                                 |                                                                                                                                                                                                                                                                                                                                                                                                                                                                                                                                                                                                                                                                                                                                                                                                                                                                                                                                                                                                                                                              |
|---------------------------------|--------------------------------------------------------------------------------------------------------------------------------------------------------------------------------------------------------------------------------------------------------------------------------------------------------------------------------------------------------------------------------------------------------------------------------------------------------------------------------------------------------------------------------------------------------------------------------------------------------------------------------------------------------------------------------------------------------------------------------------------------------------------------------------------------------------------------------------------------------------------------------------------------------------------------------------------------------------------------------------------------------------------------------------------------------------|
| Journal:                        | <i>BMJ Open</i>                                                                                                                                                                                                                                                                                                                                                                                                                                                                                                                                                                                                                                                                                                                                                                                                                                                                                                                                                                                                                                              |
| Manuscript ID                   | bmjopen-2023-075846.R2                                                                                                                                                                                                                                                                                                                                                                                                                                                                                                                                                                                                                                                                                                                                                                                                                                                                                                                                                                                                                                       |
| Article Type:                   | Protocol                                                                                                                                                                                                                                                                                                                                                                                                                                                                                                                                                                                                                                                                                                                                                                                                                                                                                                                                                                                                                                                     |
| Date Submitted by the Author:   | 25-Dec-2023                                                                                                                                                                                                                                                                                                                                                                                                                                                                                                                                                                                                                                                                                                                                                                                                                                                                                                                                                                                                                                                  |
| Complete List of Authors:       | Mathier, Etienne; Department of Radiation Oncology, Inselspital, Bern University Hospital, University of Bern<br>Althaus, Alexander; Department of Radiation Oncology, Inselspital, Bern University Hospital, University of Bern<br>Zwahlen, Daniel; Kantonsspital Winterthur, Department of Radiation Oncology<br>Lustenberger, Jens; University Hospital Basel, Department of Radiation Oncology<br>Zamboglou, Constantinos; German Oncology Center, European University Cyprus, Limassol, Cyprus<br>De Bari, Berardino; Réseau hospitalier neuchâtelois, Department of Radiation Oncology<br>Aebersold, Daniel M.; Department of Radiation Oncology, Inselspital, Bern University Hospital, University of Bern<br>Guckenberger, Matthias; University Hospital Zurich,<br>Zilli, Thomas; Oncological Institute of Southern Switzerland, EOC, Bellinzona, Switzerland, Department of Radiation Oncology; Università della Svizzera italiana<br>Shelan, Mohamed; Department of Radiation Oncology, Inselspital, Bern University Hospital, University of Bern |
| <b>Primary Subject Heading</b>: | Oncology                                                                                                                                                                                                                                                                                                                                                                                                                                                                                                                                                                                                                                                                                                                                                                                                                                                                                                                                                                                                                                                     |
| Secondary Subject Heading:      | Oncology                                                                                                                                                                                                                                                                                                                                                                                                                                                                                                                                                                                                                                                                                                                                                                                                                                                                                                                                                                                                                                                     |
| Keywords:                       | Radiation oncology < RADIOTHERAPY, Prostatic Neoplasms, Urological tumours < ONCOLOGY                                                                                                                                                                                                                                                                                                                                                                                                                                                                                                                                                                                                                                                                                                                                                                                                                                                                                                                                                                        |
|                                 |                                                                                                                                                                                                                                                                                                                                                                                                                                                                                                                                                                                                                                                                                                                                                                                                                                                                                                                                                                                                                                                              |

SCHOLARONE™  
Manuscripts

1  
2  
3  
4 1 **HypoFocal SRT Trial: Ultra-hypo fractionated focal salvage radiotherapy**  
5  
6  
7 2 **for isolated prostate bed recurrence after radical prostatectomy -**  
8  
9 3 **Single-arm phase II Study - Clinical Trial Protocol.**

11 4 Etienne Mathier<sup>1#</sup>, Alexander Althaus<sup>1#</sup>, Daniel R. Zwahlen<sup>2</sup>, Jens Lustenberger<sup>3</sup>, Constantinos  
12 5 Zamboglou<sup>4</sup>, Berardino De Bari<sup>5</sup>, Daniel M. Aebbersold<sup>1</sup>, Matthias Guckenberger<sup>6</sup>, Thomas Zilli<sup>7\*</sup>,  
13 6 Mohamed Shelan<sup>1\*</sup>

17 7 #Equal contribution as first authors

18 8 \*Equal contribution as last authors

19 9 Affiliations

20 10 <sup>1</sup> Department of Radiation Oncology, Inselspital, Bern University Hospital, University of Bern, Switzerland

21 11 <sup>2</sup> Department of Radiation Oncology, Kantonsspital Winterthur, Winterthur, Switzerland

22 12 <sup>3</sup> Department of Radiation Oncology, University Hospital of Basel, Basel, Switzerland

23 13 <sup>4</sup> German Oncology Center, European University Cyprus, Limassol, Cyprus

24 14 <sup>5</sup> Department of Radiation Oncology, Réseau hospitalier neuchâtelois, La Chaux-de-Fonds, Switzerland

25 15 <sup>6</sup> Department of Radiation Oncology, University Hospital Zürich, University of Zurich, Switzerland

26 16 <sup>7</sup> Department of Radiation Oncology, Oncology Institute of Southern Switzerland, EOC, Bellinzona,

27 17 Switzerland; Facoltà di Scienze Biomediche, Università della Svizzera Italiana, Lugano, Switzerland

28 18 \* Correspondence:

29 19 Mohamed Shelan, MD

30 20 Department of Radiation Oncology, Inselspital, Bern University Hospital, University of Bern, 3010 Bern,

31 21 Switzerland

32 22 Tel: +41 31 632 26 32

33 23 Email: [mohamed.shelan@insel.ch](mailto:mohamed.shelan@insel.ch)

## 25 ABSTRACT

26 **Introduction:** Despite radical prostatectomy (RP) and radiotherapy (RT) being established treatments for  
27 localized prostate cancer, a significant number of patients experience recurrent disease. While  
28 conventionally fractionated RT is still being used as a standard treatment in the postoperative setting, ultra-  
29 hypofractionated RT has emerged as a viable option with encouraging results in patients with localized  
30 disease in the primary setting. In addition, recent technological advancements in RT delivery and precise  
31 definition of isolated macroscopic recurrence within the prostate bed using Prostate-Specific Membrane  
32 Antigen-Positron Emission Tomography (PSMA-PET) and multiparametric magnetic resonance imaging  
33 (mpMRI) allow the exploration of ultra-hypofractionated schedules in the salvage setting using five  
34 fractions.

35 **Methods and analysis:** In this single-arm prospective phase II multicenter trial, 36 patients with node-  
36 negative prostate adenocarcinoma treated with radical prostatectomy (RP) at least 6 months before trial  
37 registration, tumor stage pT2a-3b, R0-1, pN0, or cN0 according to the UICC TNM 2009 and evidence of  
38 measurable local recurrence within the prostate bed detected by PSMA PET/CT and mpMRI within the last  
39 3 months, will be included. The patients will undergo focal ultra-hypofractionated salvage RT (sRT) with  
40 34 Gy in 5 fractions every other day to the site of local recurrence in combination with 6 months of  
41 Androgen deprivation therapy. The primary outcome of this study is biochemical relapse-free survival at 2  
42 years. Secondary outcomes include acute side effects (until 90 days after the end of RT) of grade 3 or higher  
43 based on Common Terminology Criteria for Adverse Events (CTCAE version 5), progression-free survival,  
44 metastasis-free survival, late side effects, and the quality of life (based on EORTC QLQ-C30, QLQ-PR25).

45 **Ethics and dissemination:** The study has received ethical approval from the Ethics Commission of the  
46 Canton of Bern (KEK-BE 2022-01026). Academic dissemination will occur through publications and  
47 conference presentations.

48 **Trial registration:** ClinicalTrials.gov NCT05746806. Registered on February 28, 2023.

49



1  
2  
3 **50 Strengths and limitations of this study:**  
4

- 5  
6 **51** • Innovative trial evaluating focal SBRT combined with short-term ADT for treating isolated local  
7 **52** recurrence after RP.  
8  
9 **53** • Treatment planning is precisely defined based on PSMA PET imaging and mpMRI.  
10  
11 **54** • Potential for improved efficacy and toxicity profile of salvage radiotherapy.  
12  
13 **55** • Non-randomized trial; further research will be required.  
14 **56** • Small sample size.  
15

16 **57 Study status:** Open for accrual.  
17  
18

19 **58 Funding:** Debiopharm AG and Berger-Janser Stiftung  
20  
21

22 **59 Keywords:** ultra-hypofractionation; SBRT; local recurrence; prostate cancer; salvage radiotherapy.  
23  
24

25 **60**  
26  
27  
28  
29  
30  
31  
32  
33  
34  
35  
36  
37  
38  
39  
40  
41  
42  
43  
44  
45  
46  
47  
48  
49  
50  
51  
52  
53  
54  
55  
56  
57  
58  
59  
60

## 61 BACKGROUND

62 Radical prostatectomy (RP) and radiotherapy (RT) are cornerstones for the treatment of localized prostate  
63 cancer (PC) [1]. However, around 30% to 60% of patients undergoing RP will develop recurrent disease  
64 [2, 3]. Various large randomized controlled studies have shown the effectiveness of postoperative RT in  
65 men who have a high risk of local recurrence following RP, such as pT3 tumor or positive resection margins  
66 [4–8]. In the era of high-sensitivity prostate-specific antigen (PSA) and prostate-specific membrane  
67 antigen-positron emission tomography and computed tomography (PSMA-PET/CT) as a standard staging  
68 examination in recurrent PC, new data suggest comparable oncological results if patients are treated early  
69 with salvage RT (sRT) compared to immediate adjuvant RT [9–12]. Nevertheless, the aforementioned trials  
70 and those involving patients receiving sRT due to macroscopic tumor recurrence in the prostate bed were  
71 conducted with conventionally fractionated RT, typically 2 Gy per fraction [4–12].

72 Recently, ultra-hypofractionated RT, using usually >5 Gy or higher per fraction, was assessed as a valid  
73 therapeutic option in patients with low- or intermediate-risk as a definitive treatment. Published data with  
74 fair follow-up periods demonstrated excellent biochemical control management with a favorable toxicity  
75 profile [13–20]. Moreover, the evidence on ultra-hypofractionated in high-risk individuals is emerging, and  
76 many significant studies have reported favorable findings [21–26]. Ultra-hypofractionation is used to treat  
77 patients with PC due to its low  $\alpha/\beta$  value which is thought to be around 1.5 Gy [27, 28]. It is anticipated  
78 that increasing the dose per fraction would increase the therapeutic ratio and, thus, the potential tumor  
79 control. Nevertheless, considering the low toxicity rates reported [29–37], using moderate  
80 hypofractionation in the postoperative setting with a daily RT dose of up to 3 Gy per fraction does not seem  
81 to corroborate this concern. However, the evidence on postoperative ultra-hypofractionated RT to the  
82 prostate bed is still in its early stages.

83 Further improvement in the oncological outcomes can be expected through technological developments in  
84 RT delivery and precise targeting of the local relapses in the prostate bed. A sRT using an ultra-  
85 hypofractionated schedule delivered in 5 fractions and limited only to the site of isolated macroscopic  
86 recurrence in the prostate bed as defined by PSMA-PET and multiparametric magnetic resonance imaging  
87 (mpMRI) in combination with short-term androgen deprivation therapy for 6 months, may represent a valid  
88 treatment strategy to improve the therapeutic ratio in these patients (shorter overall treatment time, better  
89 sparing of organs at risk while delivering higher biological-equivalent dose into the target volume).

1  
2  
3 90 The main objective of this prospective single-arm trial is to assess the efficacy and safety of ultra-  
4 91 hypofractionated sRT delivered in 5 fractions to the site of local recurrence within the prostate bed with  
5 92 target delineation based on PSMA PET and MRI.  
6  
7

## 8 9 93 **METHODS/DESIGN**

10  
11 94 The Hypo Focal sRT Trial protocol was constructed using the SPIRIT reporting guidelines [29]. Following  
12 95 permission from the regional ethics committees (KEK-BE 2022-01026), the research is registered with  
13 96 ClinicalTrials.gov (NCT05746806) and the Swiss National Clinical Trials Portal. Both the sponsor-  
14 97 investigator and the trial statistician have given their approval to the protocol version 3.0 (dated  
15 98 11.11.2022).  
16  
17  
18  
19

### 20 21 99 **Study Population**

#### 22 23 100 **- Inclusion criteria:**

- 24 101 1. Before registration and before any trial-specific procedures, written informed consent in  
25 102 accordance with ICH/GCP rules is required.
- 26  
27 103 2. Minimum age to register is eighteen years old.
- 28  
29 104 3. Performance level 0-1 according to WHO.
- 30  
31 105 4. Lymph node negative adenocarcinoma of the prostate treated with RP at least 6 months before  
32 106 trial registration. Tumor stage pT2a-3b, R0-1, pN0 or cN0 according to the UICC TNM 2009.
- 33  
34 107 5. Evidence of measurable local recurrence at the prostate bed detected by PSMA PET/CT and  
35 108 mpMRI within the last 3 months. In case of unclear local recurrence, biopsy confirmation is  
36 109 recommended.  
37
- 38 110 6. Patient must have non-metastatic (N0, M0) disease, as defined by no evidence of nodal or  
39 111 distant metastases seen on PSMA PET scan.  
40 112
- 41 113 7. Patients must have a testosterone level > 50 ng/dL.  
42  
43 114
- 44 115 8. Patients must not have had bilateral orchiectomy, LHRH agonists, antiandrogens, or any  
45 116 combination of these in the past.  
46  
47  
48  
49  
50  
51  
52  
53  
54  
55 117

1  
2  
3 118 9. Absence of any psychological, family, sociological, or geographic situation that would make  
4 119 it difficult for the patient to adhere to the research protocol and follow-up plan; the patient should  
5 120 be informed of these factors before registering for the trial.  
6  
7  
8 121

9  
10 122 **- Exclusion criteria:**

- 11  
12 123 1. PSA levels (> 0.4 ng/mL) that persist 4–20 weeks after RP.  
13  
14 124 2. Previous diagnosis of hematologic or primary solid malignancy during the preceding three  
15 125 years previous to registration, except for curatively managed localized non-melanoma skin  
16 126 cancer.  
17  
18 127 3. Use of substances known to alter PSA levels, such as androgen deprivation therapy and any  
19 128 kind of androgen suppression medication, within four weeks of the start of the trial treatment  
20 129 phase.  
21  
22 130 4. Bilateral hip prosthesis.  
23  
24 131 5. Co-morbidities that are severe or active and that are likely to have an effect on whether or not  
25 132 sRT is advisable.  
26  
27 133 6. Treatment with any experimental treatment or involvement in a clinical trial within the last  
28 134 thirty days (with the exception of concurrent participation in the biobank research, which is  
29 135 allowed) is required for eligibility to register.  
30  
31  
32  
33 136

34  
35 137 **Study design and sample size**

36  
37 138 This is a single-arm, prospective, phase II multicenter study. According to the published prospective trials  
38 139 and retrospective series reporting the outcomes of the normo-fractionated sRT, we define biochemical  
39 140 relapse-free survival at 2 years of 60% as poor and of 80% as the promising outcome that would justify  
40 141 further investigation [30–33]. We will therefore test the null hypothesis that the biochemical relapse-free  
41 142 survival at 2 years is lower than 60% against the alternative that it is at least 80%. Based on a one-sample  
42 143 binomial exact test with a one-sided alpha of 5%, 36 patients are required to reach a power of 80%, not  
43 144 taking into account patients lost to follow-up. We will control the safety of the intervention during the trial  
44 145 by assessing acute side effects (grade 3 or higher) at 90 days after 12 and 24 patients. The trial will be  
45 146 stopped if there is evidence that the proportion of patients with acute side effects (grade 3 or higher) is  
46 147 larger than 27%; the proportion observed would be tested using one-sample binomial exact tests with a one-  
47 148 sided alpha of 5%. **Figure 1** shows a summary of the study design and schedule.  
48  
49  
50  
51  
52  
53  
54  
55  
56  
57  
58  
59  
60

**149 Outcomes****150 Primary outcome**

- 151 - Biochemical relapse-free survival at 2 years

**152 Secondary outcome**

- 153 - Acute side effects (until 90 days after the end of RT) of grade 3 or higher based on CTCAE v5
- 154 - Progression-free survival
- 155 - Metastasis-free survival
- 156 - Late side effects
- 157 - Quality of life (based on EORTC QLQ-C30, QLQ-PR25)

**158 Study Intervention****159 Pre-registration imaging**

160 Within 3 months prior to registration, PSMA PET/CT is mandatory to exclude regional or distant  
161 metastasis. Both <sup>18</sup>F- and <sup>68</sup>Ga-PSMA tracers are allowed. An mpMRI of the prostate bed is required  
162 within 3 months before registration is mandatory to define the extension of local recurrence.

**164 Radiation treatment (SBRT)****165 Patient's positioning, immobilization, data acquisition and simulation:**

166 Determining the gross tumor volume (GTV), the planned target volume (PTV), and the essential  
167 structures requires a treatment-planning CT scan with the patient in the same position as during  
168 treatment. The patients will be placed in the supine position for the entire process. Support for the knees  
169 and legs is strongly advised. On a flat table, each patient will be placed in the treatment position while  
170 being immobilized by a unique device. It is advised that patients be treated and scanned while having  
171 a comfortably full bladder. For prostate bed RT, it is advised to have an empty rectum. An example of  
172 a bladder and rectal protocol: An empty rectum is provided by using a rectal enema ± 60 minutes before  
173 planning CT. After emptying the rectum and bladder, the patient is asked to drink the amount of 500-  
174 750 ml of water. The planning CT is then performed after 40 minutes. The patient repeats the bladder  
175 filling procedure during the entire treatment course. An endorectal balloon can be used for repositioning  
176 purposes as per local institutional standards.

177 Radiopaque fiducial markers (mandatory for robotic-based treatments) may be implanted in the prostate  
178 bed one week before the planning CT scan at the discretion of the treating center. During the planning  
179 and performance of the treatment, the patient's location will be reproduced employing skin markings

1  
2  
3 180 and orthogonal laser beams. The pelvis should be scanned during the treatment planning CT scan, at  
4  
5 181 least from the lower portion of the second lumbar vertebra (L2) to the lower half of the ischial  
6  
7 182 tuberosities. The CT scan must cover the full target volume and all organs at risk (OAR). A CT slice  
8  
9 183 should be no thicker than 2 mm. On every CT slice that shows the GTV, PTV, and OAR, these  
10  
11 184 structures must be highlighted. Morphological and topographical information given by clinical  
12  
13 185 examination, mpMRI and PET/CT must be integrated to delineate the target volumes. Rigid or  
14  
15 186 deformable co-registration is allowed.

187

## 188 **Treatment Volumes:**

### 189 **Definition of target volume (refer to Supplementary material 1):**

- 21 190 • **The Gross Tumor Volume of the suspicious local recurrence (GTV)** is defined by the  
22  
23 191 physician as all known gross disease *before any treatment* as defined by the CT/MRI images  
24  
25 192 and PET scan using rigid or deformable fusion and/or clinical information.
- 26 193 • **The Planning Target Volume (PTV)** will provide the GTV a margin to account for daily  
27  
28 194 treatment setup variations and internal motion brought on by breathing or movement during  
29  
30 195 treatment. The PTV should surround the GTV with a 5 mm margin on all sides.

31 196

### 32 197 **Organs at risk (OAR):**

34 198 The delineation of the **OAR** should be done following the RTOG guidelines; the normal pelvis atlas on the  
35  
36 199 RTOG/NRG Oncology website provides examples of normal tissue contours [34].

38 200 **The bladder** is defined by its external wall, with a thickness of 5 mm delineated on each slide, from the  
39  
40 201 dome to the bladder neck and the start of the vesicourethral anastomosis (VUA).

42 202 **The VUA and distal urethra** are delineated from the bladder neck to the distal urethra using mpMRI  
43  
44 203 sequences, and a 2-mm isotropic margin is added around these structures to create a planning organ at risk  
45  
46 204 volume (PRV).

48 205 **The rectum** is defined by its external wall, with a thickness of 5 mm from the recto-sigmoid junction to  
49  
50 206 ischial tuberosities.

52 207 **The femoral heads** are delineated from the top of the hip joint to the small trochanter, while the bowel  
53  
54 208 bag is delineated from the most inferior small or large bowel loop to 1 cm above the planning target volume  
55  
56 209 (PTV) for coplanar beam plans, or more if non-coplanar beams or tomotherapy plans are used.

210 It is suggested that dose constraints be adhered to; however, if this is not practicable, the dose per fraction  
 211 or target coverage may be adjusted to comply with the constraint. **Table 1** shows the dose constraints for  
 212 OARs.

213  
 214 **Table 1: Dose constraints for OARs.**

| Organ at risk              | Dose Constraint | Aim     |
|----------------------------|-----------------|---------|
| Rectal Wall                | V18.1 Gy        | < 50%   |
|                            | V29 Gy          | < 20%   |
|                            | V36 Gy          | < 1 cc  |
| Bladder Wall               | V18.1 Gy        | < 40%   |
|                            | V 37 Gy         | < 10 cc |
| PRV_VUA and distal Urethra | V36 Gy          | < 1 cc  |
| Femoral heads              | V14.5 Gy        | < 5%    |
| Penile bulb                | V29.5 Gy        | < 50%   |
| Bowel                      | V18.1 Gy        | < 5 cc  |
|                            | V30 Gy          | < 1 cc  |

215  
 216 **Treatment techniques**

217 It is required to apply rotating techniques or intensity-modulated RT (IMRT). Only dosimetry  
 218 produced by inversed treatment planning is, by definition, regarded as IMRT. Step-and-Shoot,  
 219 Sliding-Window, and Volumetric Modulated Arc therapy (VMAT), as well as MRI-guided  
 220 radiation therapies (MRIdian® or Elekta Unity®), may be employed for performing IMRT.  
 221 Treatment with Cyberknife® is allowed.

222  
 223 **Dose prescription**

224 A total dose of 34 Gy (80% of the maximal dose) will be delivered in 5 fractions and fractions every second  
 225 day (NTD2Gy 80 Gy  $\alpha/\beta=1.5$ Gy for tumor control and 66.6 Gy  $\alpha/\beta=3$ Gy for late toxicity). Treatment will  
 226 be prescribed to the periphery of the target (80% of the dose (=34Gy), should cover 90% of the PTV)  
 227 covering the PTV. A maximal dose of 40 Gy is allowed to GTV. The priority will be given with respect to  
 228 dose constraints over PTV coverage.

229 **Androgen deprivation therapy**



230 For a total of six months, each patient will be treated with a three-monthly formulation of an LHRH-agonist  
 231 or antagonist. Prevention with an antiandrogen is indicated for at least 5 days before the initial injection of  
 232 the agonist in the case of an LHRH-agonist flare and should not be sustained for more than 15 days of the  
 233 first-month duration.

- 234 • Androgen deprivation therapy (ADT) should start no later than the 1st SBRT fraction and no earlier  
 235 than 2 weeks before the start of RT.
- 236 • Palliative ADT should not be initiated for biochemical progression until clinical progression has  
 237 been demonstrated. In the event of symptom progression, palliative ADT is required. In the event  
 238 of asymptomatic clinical progression, men who are well-informed are permitted to delay ADT until  
 239 symptomatic progression occurs (EAU 2023 guidelines) [35]. Generally, we would only begin  
 240 ADT in asymptomatic individuals if traditional imaging confirmed clinical progression. As a result,  
 241 we would not advocate initiating ADT for PET-positive lesions that do not seem suspicious on  
 242 conventional imaging (CT/MRI/bone scintigraphy).
- 243 • ADT-related toxicity should be managed, according to Nguyen et al. [36].

## 244 Study procedures

245 The study procedures and the schedule of assessments are presented in **Table 2**.

246 **Table 2: Schedule of assessments**

| Required investigation         | Inclusion                             |                                      | Treatment | 1 Month after RT | 3 Months after RT                    | 6 Months after RT | Every 6 Months till the end of 2nd year after RT, then once per year till 60 months |
|--------------------------------|---------------------------------------|--------------------------------------|-----------|------------------|--------------------------------------|-------------------|-------------------------------------------------------------------------------------|
|                                | Within 12 weeks prior to registration | Within 2 weeks prior to registration |           |                  | Within 2 weeks prior to registration |                   |                                                                                     |
| Eligibility Check              | x                                     |                                      |           |                  |                                      |                   |                                                                                     |
| Signed informed consent        | x                                     |                                      |           |                  |                                      |                   |                                                                                     |
| Record prior history           | x                                     |                                      |           |                  |                                      |                   |                                                                                     |
| Visits                         |                                       |                                      |           |                  |                                      |                   |                                                                                     |
| Physical Examination           |                                       | x                                    |           | x                | x                                    | x                 | x                                                                                   |
| Biochemistry (Blood Samples) * |                                       |                                      |           |                  |                                      |                   |                                                                                     |
| PSA                            |                                       | x                                    |           | x                | x                                    | x                 | x                                                                                   |

1  
2  
3  
4  
5  
6  
7  
8  
9  
10  
11  
12  
13  
14  
15  
16  
17  
18  
19  
20  
21  
22  
23  
24  
25  
26  
27  
28  
29  
30  
31  
32  
33  
34  
35  
36  
37  
38  
39  
40  
41  
42  
43  
44  
45  
46  
47  
48  
49  
50  
51  
52  
53  
54  
55  
56  
57  
58  
59  
60

|                         |   |   |   |   |   |   |   |
|-------------------------|---|---|---|---|---|---|---|
| Testosterone            |   | x |   | x | x | x | x |
| Radiology               |   |   |   |   |   |   |   |
| PSMA PET                | x |   |   |   |   |   |   |
| MRI                     | x |   |   |   |   |   |   |
| Radiotherapy            |   |   |   |   |   |   |   |
| Treatment planning      |   |   | x |   |   |   |   |
| Record Planning results |   |   | x |   |   |   |   |
| Adverse Events          |   |   |   |   |   |   |   |
| Baseline toxicity       |   | x |   |   |   |   |   |
| Acute toxicity          |   |   | x | x | x |   |   |
| Late toxicity           |   |   |   |   |   | x | x |
| EORTC QoL questionnaire |   |   |   |   |   |   |   |
| QLQ-C30                 |   | x |   | x | x | x | x |
| QLQ-PR25                |   | x |   | x | x | x | x |

## 247 Planned Analysis

248 For descriptive statistics, the categorical variables will be presented as frequency and percentage, the  
 249 normally distributed continuous variables will be presented as mean and standard deviation, and the  
 250 non-normally distributed continuous variables will be presented as median and interquartile range.

251  
 252 The time-to-event outcomes will be analyzed using Kaplan-Meier-curves, the proportion of responders  
 253 at 1 and 2 years, and the restricted mean survival time at 1 and 2 years with a 95% confidence interval.  
 254 Binary outcomes will be reported using absolute and relative frequencies with 95% confidence  
 255 intervals.

256  
 257 The probability of biochemical relapse-free survival and metastasis-free survival will be estimated  
 258 using the Kaplan-Meier method. Cox proportional hazards models will be fit to assess the effects of  
 259 treatment and baseline clinical and pathologic features (such as PSA, PSA doubling time, Gleason score  
 260 etc.) on biochemical relapse-free survival and metastasis-free survival).

261  
 262 Further subgroup analysis will follow after finalizing the accrual (R0 vs. R1), (pN0 vs. cN0) and based  
 263 the location of the recurrence.

## 264 **Study status**

265 Open and currently accruing since February 20, 2023.

266 The approximate recruitment will be completed by October 2024.

267

## 268 **Patient and public involvement**

269 • Patients were not involved in the idea conception of this trial.

270 • Patients were not involved in the design of this study nor in recruitment of the study.

271

272

## 273 **Ethics and dissemination**

274 The study has been submitted and approved by ethics commission of Canton of Bern. A written informed  
275 consent will be obtained from the study participants. Academic dissemination will occur through  
276 publication and conference presentations.

277

## 278 **DISCUSSION**

279 External beam RT is a well-established treatment for organ-confined prostate cancer, with comparable  
280 cure rates to radical prostatectomy [37]. Hypofractionation employs a higher dose-per-fraction while  
281 reducing the number of fractions offering a clinical benefit in terms of tumor control in tumors with a  
282 low alpha/beta ratio (e.g. prostate cancer) and favorable toxicity, allowing for higher patient comfort [38].  
283 Based on the results of ten prior randomized trials, there is compelling evidence suggesting that  
284 moderate hypofractionation RT is not inferior to standard normofractionation RT schedules as a  
285 definitive treatment for primary PC[39]. This evidence led to the integration of moderate  
286 hypofractionation schedules into the list of valid treatment options in the NCCN guidelines [40]. In  
287 addition, recent advancements in the field of RT, including IMRT/rotational techniques, image-guided  
288 RT (IGRT), and stereotactic RT (SBRT), have permitted the gradual integration of ultra-  
289 hypofractionation in the treatment of localized PC. SBRT for PC has generated adequate data in terms  
290 of tumor control, patient-reported quality of life, and minimal toxicity [14, 16, 25] to support its  
291 introduction in clinical practice. In addition, the prostate cancer-working group of the German Society  
292 of Oncology (DEGRO) and the NCCN Guidelines approve the use of SBRT in the treatment of localized  
293 low and intermediate-risk prostate cancer and propose its use in clinical trials for patients with the  
294 localized high-risk disease [41, 42].

1  
2  
3 295 The evidence of ultra-hypofractionation has recently been supported by two randomized studies (HYPO  
4 296 RT-PC) [25], PACE-B trial [14]), which compare its usage to conventional fractionation. Nevertheless,  
5 297 only HYPO-RT-PC provided information on the outcomes of long-term tumor and toxicity control. A  
6 298 randomized systematic review and meta-analysis of phase 3 studies evaluating SBRT with normo- and  
7 299 hypo-fractionated regimens were published in 2020. It was determined that the ultra-hypofractionated  
8 300 regimens had comparable 5-year disease-free survival outcomes, with late gastrointestinal and  
9 301 genitourinary toxicity of <15% and <21%, respectively, in comparison to hypofractionated regimens and  
10 302 conventional RT [43]. In 2022, the toxicity outcome of the PACE B Trial was published, showing no  
11 303 significant differences between the five fractions of SBRT and conventional RT [44].

12  
13  
14 304 The use of moderate hypofractionation is gaining more popularity as a standard treatment in the  
15 305 postoperative setting [45]. Retrospective and prospective single-arm studies support a safe toxicity profile  
16 306 and promising biochemical control rates with hypofractionation [45]. According to newly released findings  
17 307 from the phase III clinical study NRG-GU003 evaluating hypofractionated postoperative prostate bed RT  
18 308 (HYPORT) to conventional post-prostatectomy RT for men with prostate cancer, treatment with HYPORT  
19 309 did not cause a rise in patient-reported GI or genitourinary (GU) toxicity for study subjects, with a  
20 310 comparable biochemical disease control at the 2-year follow-up [46].

21  
22  
23 311 Prakash et al. [47] did a theoretical feasibility study of SBRT following RP depending on the NTCP (Normal  
24 312 Tissue Complication Probability) model, using individuals who had been managed with conventional  
25 313 EBRT for biochemical recurrence after prostatectomy. The goal was to show that SBRT could be used  
26 314 safely and effectively in this clinical situation. A dose of 30 Gy was delivered to the PTV in five fractions,  
27 315 translating to an equivalent dose in 2 Gy fractions (EQD2) of 64.3 Gy, assuming an  $\alpha/\beta$  value of 1.5 Gy, in  
28 316 accordance with RTOG standards to define postprostatectomy volumes. To predict the probability of late  
29 317 rectal and/or bladder toxicity, the NTCP model was used. According to the NTCP model, the average  
30 318 incidence of grade  $\geq 2$  late rectal toxicity was assessed to be 0.28%, and that of late grade 2 toxicity on the  
31 319 bladder neck was determined to be as low as 0.00013%, while the average incidence of late urinary  
32 320 symptoms exacerbation was calculated to be 4.81 %. The author's conclusion is that employing SBRT after  
33 321 surgery looks viable and may provide a safe, practical therapeutic alternative for individuals in both the  
34 322 adjuvant and salvage following biochemical failure, taking into account the limitations of the NTCP model.

35  
36  
37 323 Sampath et al. examined the use of stereotactic dose-escalated RT on prostate beds in a prospective phase  
38 324 1 research, which revealed a crude rate of biochemical control of 42% in the overall population [48].  
39 325 Patients received care using dose fractionation regimens of 35 Gy, 40 Gy, and 45 Gy in five fractions each.  
40 326 The authors emphasized that raising the dosage to 45 Gy was possible without increasing the number of

327 adverse events but that there was no observed improvement in PSA control when compared to 40 Gy in 5  
 328 fractions. Similarly, a recent propensity score study comparing salvage SBRT and conventional RT for  
 329 macroscopic prostate bed recurrence revealed similar bRFS and PFS rates across the two modalities. On  
 330 the other hand, a reduced incidence of toxicity was verified for patients receiving focal stereotactic sRT  
 331 compared to conventionally fractionated sRT, with acute GI and GU adverse events recorded in 4.4%  
 332 against 44.4% ( $p < 0.001$ ) and 28.9% against 46.7% ( $p = 0.08$ ) of participants, and late GI and GU side  
 333 effects reported in 0% versus 13.3% ( $p = 0.04$ ) and 6.7% versus 22.2% ( $p = 0.03$ ) of patient populations,  
 334 respectively [49]. The authors argue that salvage SBRT is a desirable substitute for conventional sRT in  
 335 this situation due to the approach's favorable therapeutic ratio and the less number of required fractions.  
 336 Additionally, the prospective phase 2 SCIMITAR trial reported the quality of life and toxicity outcome of  
 337 100 patients who received postoperative ultra-hypofractionated SBRT delivered in 5 fractions [50]. Acute  
 338 and late grade 2 GU toxicities were both 9%, while acute and late grade 2 GI toxicities were 5% and 0%,  
 339 respectively. Three patients had grade 3 toxicity ( $n = 1$  GU,  $n = 2$  GI) [50].

340 The expected results from the Hypo-Focal sRT trial will provide the first prospective evidence for the focal  
 341 hypofractionated RT in the salvage setting and can be used as a basis for a large multicenter phase 3 trial.  
 342 In addition to the assumed improvement in efficacy and toxicity profile due to precise customization of the  
 343 treatment target volumes, the application of a focal hypofractionated RT is expected to achieve cost-  
 344 effectiveness benefits. Due to the very short treatment course (unlike conventional RT treatments, which  
 345 can take up to 7 weeks), hypofractionated focal sRT leads to greater patient convenience and comfortability.

#### 346 **Abbreviations:**

|          |                                                                        |
|----------|------------------------------------------------------------------------|
| AE       | Adverse Event                                                          |
| ADC      | Apparent diffusion coefficient                                         |
| ADT      | Androgen deprivation therapy                                           |
| ASR/DSUR | Annual Safety Report / Development Safety Report                       |
| ASTRO    | American Society for Radiation Oncology                                |
| ASCO/AUA | American Society of Clinical Oncology/ American Urological Association |
| ASTRO    | American Society for Therapeutic Radiology and Oncology                |
| BASEC    | Business Administration System for Ethical Committees                  |
| bRFS     | Biochemical relapse-free survival                                      |
| CA       | Clinical approval                                                      |
| CBCT     | Cone Beam CT                                                           |

|                        |                                                                                                        |
|------------------------|--------------------------------------------------------------------------------------------------------|
| CEC                    | Clinical ethics committee                                                                              |
| ClinO                  | Ordinance on Clinical Trials in Human Research (in German: KlinV, in French: OClin, in Italian: OSRUm) |
| CRF                    | Case Report Form                                                                                       |
| CTCAE                  | Common Terminology Criteria for Adverse Events                                                         |
| CTU                    | Clinical trials unit                                                                                   |
| CTV                    | Clinical target volume                                                                                 |
| DCE                    | Dynamic contrast enhancement                                                                           |
| DEGRO                  | German Society of radiation oncology                                                                   |
| DFS                    | Disease free survival                                                                                  |
| DRE                    | Digital rectal examination                                                                             |
| DVH                    | Dose-volume histogram                                                                                  |
| DWI                    | Diffusion-weighted imaging                                                                             |
| EAU                    | European Association of Urology                                                                        |
| EORTC                  | European Organisation for Research and Treatment of Cancer                                             |
| <sup>18</sup> F        | Fluorine-18                                                                                            |
| FADP                   | Federal Act on Data Protection (in German: DSG, in French: LPD, in Italian: LPD)                       |
| FOPH                   | Federal Office of Public Health                                                                        |
| <sup>18</sup> F-DCFPYL | Pylarify - piflufolastat Fluorine-18                                                                   |
| eCRF                   | Electronic Case Report Form                                                                            |
| <sup>68</sup> Ga       | Gallium-68                                                                                             |
| GCP                    | Good Clinical Practice                                                                                 |
| GTV                    | Gross tumor volume                                                                                     |
| GI                     | Gastrointestinal                                                                                       |
| GU                     | Genitourinary                                                                                          |
| HR                     | Hazard ratio                                                                                           |
| HRA                    | Human Research Act (in German: HFG, in French: LRH, in Italian: LRUm)                                  |
| ICH                    | International Conference on Harmonisation                                                              |
| IGRT                   | Image-guided radiotherapy                                                                              |
| IMRT                   | Intensity-modulated radiotherapy                                                                       |
| LHRH                   | Luteinizing hormone-releasing hormone                                                                  |
| LHRHa                  | Luteinizing hormone-releasing hormone agonist                                                          |
| MFS                    | Metastasis free survival                                                                               |

|    |        |                                            |
|----|--------|--------------------------------------------|
| 1  |        |                                            |
| 2  |        |                                            |
| 3  |        |                                            |
| 4  | mpMRI  | Multiparametric magnetic resonance imaging |
| 5  | MRI    | Magnetic resonance imaging                 |
| 6  |        |                                            |
| 7  | NCI    | National cancer institute                  |
| 8  |        |                                            |
| 9  | NTCP   | Normal tissue complication probability     |
| 10 |        |                                            |
| 11 | NTD    | Normalized total dose                      |
| 12 |        |                                            |
| 13 | NCCN   | National comprehensive cancer network      |
| 14 |        |                                            |
| 15 | OAR    | Organs at risk                             |
| 16 |        |                                            |
| 17 | OS     | Overall survival                           |
| 18 |        |                                            |
| 19 | OSEM   | Ordered subset expectation maximization    |
| 20 |        |                                            |
| 21 | PET/CT | Positron electron computed tomography      |
| 22 |        |                                            |
| 23 | PFS    | Progression-free survival                  |
| 24 |        |                                            |
| 25 | PI     | Principal Investigator                     |
| 26 |        |                                            |
| 27 | PRV    | Planning organ at risk volume              |
| 28 |        |                                            |
| 29 | PSA    | Prostate-specific antigen                  |
| 30 |        |                                            |
| 31 | PSF    | Point-spread-function                      |
| 32 |        |                                            |
| 33 | PSMA   | Prostate-specific membrane antigen         |
| 34 |        |                                            |
| 35 | PTV    | Planning target volume                     |
| 36 |        |                                            |
| 37 | RP     | Radical prostatectomy                      |
| 38 |        |                                            |
| 39 | RT     | Radiotherapy                               |
| 40 |        |                                            |
| 41 | RTOG   | Radiation therapy oncology group           |
| 42 |        |                                            |
| 43 | SAE    | Serious Adverse Event                      |
| 44 |        |                                            |
| 45 | SBRT   | Stereotactic body radiotherapy             |
| 46 |        |                                            |
| 47 | SI     | Signal intensity                           |
| 48 |        |                                            |
| 49 | sRT    | Salvage radiotherapy                       |
| 50 |        |                                            |
| 51 | TLC    | Thin layer chromatography                  |
| 52 |        |                                            |
| 53 | TMF    | Trial master file                          |
| 54 |        |                                            |
| 55 | TNM    | Tumor Nodes Metastases                     |
| 56 |        |                                            |
| 57 | TOF    | Time of flight                             |
| 58 |        |                                            |
| 59 | UICC   | Union internationale contre le cancer      |
| 60 |        |                                            |
|    | UPN    | Unique Patient Number                      |
|    |        |                                            |
|    | VUA    | Vesicourethral anastomosis                 |
|    |        |                                            |
|    | WHO    | World health organization                  |
|    |        |                                            |
|    | QLQ    | Quality of life questionnaire              |



1  
2  
3  
4  
5  
6  
7  
8  
9  
10  
11  
12  
13  
14  
15  
16  
17  
18  
19  
20  
21  
22  
23  
24  
25  
26  
27  
28  
29  
30  
31  
32  
33  
34  
35  
36  
37  
38  
39  
40  
41  
42  
43  
44  
45  
46  
47  
48  
49  
50  
51  
52  
53  
54  
55  
56  
57  
58  
59  
60

347

|     |                 |
|-----|-----------------|
| QoL | Quality of life |
|-----|-----------------|

For peer review only

1  
2  
3 348 **Acknowledgment:** None.  
4

5  
6 349 **Authors' contributions:** EM, AA, DRZ, JL, CZ, BDB, DMA, and TZ contributed to the conception and  
7  
8 350 design of the protocol, statistical design and initial drafting of the protocol. MS is the principal  
9  
10 351 investigator. All authors contributed to the quality, conception, design of the protocol, and establishment  
11  
12 352 of study specific documents.

13 353 **Funding:** This work was funded by a grant from the Berger-Janser Stiftung (Grant Number 13/2021) and  
14  
15 354 Debiopharm AG (Grant Number not applicable).

16  
17 355 **Ethical approval, protocol registration, and consent to participate:** The study received a permission  
18  
19 356 from the regional ethics committees (KEK-BE 2022-01026), the research is registered with  
20  
21 357 ClinicalTrials.gov (NCT05746806) and the Swiss National Clinical Trials Portal. Written, informed  
22  
23 358 consent to participate is and will be obtained from all participants before participating in the trial.

24  
25 359 **Patient Consent for publication:** obtained.

26  
27 360 **Competing interests statement:** None declared.  
28  
29  
30  
31  
32 361  
33  
34  
35  
36  
37  
38  
39  
40  
41  
42  
43  
44  
45  
46  
47  
48  
49  
50  
51  
52  
53  
54  
55  
56  
57  
58  
59  
60

**REFERENCES**

1. Hamdy FC, Donovan JL, Lane JA, Mason M, Metcalfe C, Holding P, et al. 10-Year Outcomes after Monitoring, Surgery, or Radiotherapy for Localized Prostate Cancer. *N Engl J Med*. 2016;375:1415–24.
2. Gandaglia G, Briganti A, Clarke N, Karnes RJ, Graefen M, Ost P, et al. Adjuvant and Salvage Radiotherapy after Radical Prostatectomy in Prostate Cancer Patients. *Eur Urol*. 2017;72:689–709.
3. Han M, Partin AW, Zahurak M, Piantadosi S, Epstein JI, Walsh PC. Biochemical (prostate specific antigen) recurrence probability following radical prostatectomy for clinically localized prostate cancer. *J Urol*. 2003;169:517–23.
4. Bolla M, van Poppel H, Collette L, van Cangh P, Vekemans K, Da Pozzo L, et al. Postoperative radiotherapy after radical prostatectomy: a randomised controlled trial (EORTC trial 22911). *Lancet*. 2005;366:572–8.
5. Bolla M, van Poppel H, Tombal B, Vekemans K, Da Pozzo L, de Reijke TM, et al. Postoperative radiotherapy after radical prostatectomy for high-risk prostate cancer: long-term results of a randomised controlled trial (EORTC trial 22911). *Lancet*. 2012;380:2018–27.
6. Thompson IM, Tangen CM, Paradelo J, Lucia MS, Miller G, Troyer D, et al. Adjuvant radiotherapy for pathologically advanced prostate cancer: a randomized clinical trial. *JAMA*. 2006;296:2329–35.
7. Thompson IM, Tangen CM, Paradelo J, Lucia MS, Miller G, Troyer D, et al. Adjuvant radiotherapy for pathological T3N0M0 prostate cancer significantly reduces risk of metastases and improves survival: long-term follow-up of a randomized clinical trial. *J Urol*. 2009;181:956–62.
8. Wiegel T, Bottke D, Steiner U, Siegmann A, Golz R, Störkel S, et al. Phase III postoperative adjuvant radiotherapy after radical prostatectomy compared with radical prostatectomy alone in pT3 prostate cancer with postoperative undetectable prostate-specific antigen: ARO 96-02/AUO AP 09/95. *J Clin Oncol*. 2009;27:2924–30.
9. Kneebone A, Fraser-Browne C, Duchesne GM, Fisher R, Frydenberg M, Herschtal A, et al. Adjuvant radiotherapy versus early salvage radiotherapy following radical prostatectomy (TROG 08.03/ANZUP RAVES): a randomised, controlled, phase 3, non-inferiority trial. *Lancet Oncol*. 2020;21:1331–40.
10. Parker CC, Clarke NW, Cook AD, Kynaston HG, Petersen PM, Catton C, et al. Timing of radiotherapy after radical prostatectomy (RADICALS-RT): a randomised, controlled phase 3 trial. *Lancet*. 2020;396:1413–21.
11. Vale CL, Fisher D, Kneebone A, Parker C, Pearse M, Richaud P, et al. Adjuvant or early salvage radiotherapy for the treatment of localised and locally advanced prostate cancer: a prospectively planned systematic review and meta-analysis of aggregate data. *Lancet*. 2020;396:1422–31.
12. Sargos P, Chabaud S, Latorzeff I, Magné N, Benyoucef A, Supiot S, et al. Adjuvant

- 1  
2  
3 403 radiotherapy versus early salvage radiotherapy plus short-term androgen deprivation therapy in  
4 404 men with localised prostate cancer after radical prostatectomy (GETUG-AFU 17): a randomised,  
5 405 phase 3 trial. *Lancet Oncol.* 2020;21:1341–52.
- 7 406 13. Boike TP, Lotan Y, Cho LC, Brindle J, DeRose P, Xie X-J, et al. Phase I dose-escalation  
8 407 study of stereotactic body radiation therapy for low- and intermediate-risk prostate cancer. *J Clin*  
9 408 *Oncol.* 2011;29:2020–6.
- 11 409 14. Brand DH, Tree AC, Ostler P, van der Voet H, Loblaw A, Chu W, et al. Intensity-modulated  
12 410 fractionated radiotherapy versus stereotactic body radiotherapy for prostate cancer (PACE-B):  
13 411 acute toxicity findings from an international, randomised, open-label, phase 3, non-inferiority  
14 412 trial. *Lancet Oncol.* 2019;20:1531–43.
- 16 413 15. Chen LN, Suy S, Uhm S, Oermann EK, Ju AW, Chen V, et al. Stereotactic body radiation  
17 414 therapy (SBRT) for clinically localized prostate cancer: the Georgetown University experience.  
18 415 *Radiat Oncol.* 2013;8:58.
- 20 416 16. Jackson WC, Silva J, Hartman HE, Dess RT, Kishan AU, Beeler WH, et al. Stereotactic  
21 417 Body Radiation Therapy for Localized Prostate Cancer: A Systematic Review and Meta-  
22 418 Analysis of Over 6,000 Patients Treated On Prospective Studies. *Int J Radiat Oncol Biol Phys.*  
23 419 2019;104:778–89.
- 26 420 17. King CR, Brooks JD, Gill H, Presti JC. Long-term outcomes from a prospective trial of  
27 421 stereotactic body radiotherapy for low-risk prostate cancer. *Int J Radiat Oncol Biol Phys.*  
28 422 2012;82:877–82.
- 30 423 18. Kotecha R, Djemil T, Tendulkar RD, Reddy CA, Thousand RA, Vassil A, et al. Dose-  
31 424 Escalated Stereotactic Body Radiation Therapy for Patients With Intermediate- and High-Risk  
32 425 Prostate Cancer: Initial Dosimetry Analysis and Patient Outcomes. *Int J Radiat Oncol Biol Phys.*  
33 426 2016;95:960–4.
- 35 427 19. Meier RM, Bloch DA, Cotrutz C, Beckman AC, Henning GT, Woodhouse SA, et al.  
36 428 Multicenter Trial of Stereotactic Body Radiation Therapy for Low- and Intermediate-Risk  
37 429 Prostate Cancer: Survival and Toxicity Endpoints. *Int J Radiat Oncol Biol Phys.* 2018;102:296–  
38 430 303.
- 40 431 20. Zilli T, Franzese C, Bottero M, Giaj-Levra N, Förster R, Zwahlen D, et al. Single fraction  
41 432 urethra-sparing prostate cancer SBRT: Phase I results of the ONE SHOT trial. *Radiother Oncol.*  
42 433 2019;139:83–6.
- 44 434 21. Bauman G, Ferguson M, Lock M, Chen J, Ahmad B, Venkatesan VM, et al. A Phase 1/2  
45 435 Trial of Brief Androgen Suppression and Stereotactic Radiation Therapy (FASTR) for High-Risk  
46 436 Prostate Cancer. *Int J Radiat Oncol Biol Phys.* 2015;92:856–62.
- 48 437 22. Callan L, Bauman G, Chen J, Lock M, Sexton T, D'Souza D, et al. A Phase I/II Trial of Fairly  
49 438 Brief Androgen Suppression and Stereotactic Radiation Therapy for High-Risk Prostate Cancer  
50 439 (FASTR-2): Preliminary Results and Toxicity Analysis. *Adv Radiat Oncol.* 2019;4:668–73.
- 52 440 23. Foerster R, Zwahlen DR, Buchali A, Tang H, Schroeder C, Windisch P, et al. Stereotactic  
53 441 Body Radiotherapy for High-Risk Prostate Cancer: A Systematic Review. *Cancers (Basel).*  
54 442 2021;13.

- 1  
2  
3 443 24. Murthy V, Gupta M, Mulye G, Maulik S, Munshi M, Krishnatry R, et al. Early Results of  
4 444 Extreme Hypofractionation Using Stereotactic Body Radiation Therapy for High-risk, Very High-  
5 445 risk and Node-positive Prostate Cancer. *Clin Oncol (R Coll Radiol)*. 2018;30:442–7.
- 7 446 25. Widmark A, Gunnlaugsson A, Beckman L, Thellenberg-Karlsson C, Hoyer M, Lagerlund M,  
8 447 et al. Ultra-hypofractionated versus conventionally fractionated radiotherapy for prostate cancer:  
9 448 5-year outcomes of the HYPO-RT-PC randomised, non-inferiority, phase 3 trial. *Lancet*.  
11 449 2019;394:385–95.
- 12 450 26. Zilli T, Jorcano S, Bral S, Rubio C, Bruynzeel AME, Oliveira A, et al. Once-a-week or every-  
13 451 other-day urethra-sparing prostate cancer stereotactic body radiotherapy, a randomized phase  
14 452 II trial: 18 months follow-up results. *Cancer Med*. 2020;9:3097–106.
- 16 453 27. Brenner DJ, Martinez AA, Edmundson GK, Mitchell C, Thames HD, Armour EP. Direct  
17 454 evidence that prostate tumors show high sensitivity to fractionation (low  $\alpha/\beta$  ratio), similar to  
18 455 late-responding normal tissue. *International Journal of Radiation Oncology\*Biophysics\*Physics*.  
20 456 2002;52:6–13.
- 22 457 28. Miralbell R, Roberts SA, Zubizarreta E, Hendry JH. Dose-fractionation sensitivity of prostate  
23 458 cancer deduced from radiotherapy outcomes of 5,969 patients in seven international institutional  
24 459 datasets:  $\alpha/\beta = 1.4$  (0.9-2.2) Gy. *Int J Radiat Oncol Biol Phys*. 2012;82:e17-24.
- 26 460 29. Chan A-W, Tetzlaff JM, Altman DG, Laupacis A, Gøtzsche PC, Krleža-Jerić K, et al. SPIRIT  
27 461 2013 statement: defining standard protocol items for clinical trials. *Ann Intern Med*.  
28 462 2013;158:200–7.
- 30 463 30. Shelan M, Odermatt S, Bojaxhiu B, Nguyen DP, Thalmann GN, Aebbersold DM, et al.  
31 464 Disease control with delayed salvage radiotherapy for macroscopic local recurrence following  
32 465 radical prostatectomy. *Front Oncol*. 2019;9:12.
- 34 466 31. Ghadjar P, Hayoz S, Bernhard J, Zwahlen DR, Hölscher T, Gut P, et al. Dose-intensified  
35 467 Versus Conventional-dose Salvage Radiotherapy for Biochemically Recurrent Prostate Cancer  
36 468 After Prostatectomy: The SAKK 09/10 Randomized Phase 3 Trial. *Eur Urol*. 2021;80:306–15.
- 38 469 32. Zilli T, Jorcano S, Peguret N, Caparrotti F, Hidalgo A, Khan HG, et al. Results of Dose-  
39 470 adapted Salvage Radiotherapy After Radical Prostatectomy Based on an Endorectal MRI  
40 471 Target Definition Model. *Am J Clin Oncol*. 2017;40:194–9.
- 42 472 33. Benziane-Ouaritini N, Zilli T, Giraud A, Ingrosso G, Di Staso M, Trippa F, et al.  
43 473 Prostatectomy Bed Image-guided Dose-escalated Salvage Radiotherapy (SPIDER): An  
44 474 International Multicenter Retrospective Study. *Eur Urol Oncol*. 2023.
- 46 475 34. NRG > About Us > Center for Innovation in Radiation Oncology > Male RTOG Normal  
47 476 Pelvis. [https://www.nrgoncology.org/About-Us/Center-for-Innovation-in-Radiation-](https://www.nrgoncology.org/About-Us/Center-for-Innovation-in-Radiation-Oncology/Male-RTOG-Normal-Pelvis)  
48 476 [Oncology/Male-RTOG-Normal-Pelvis](https://www.nrgoncology.org/About-Us/Center-for-Innovation-in-Radiation-Oncology/Male-RTOG-Normal-Pelvis). Accessed 19 Mar 2023.
- 50 478 35. 2023 Summaries and Changes of the Prostate Cancer guideline - Uroweb.  
51 479 <https://uroweb.org/guidelines/prostate-cancer/summary-of-changes>. Accessed 13 Apr 2023.
- 53 480 36. Nguyen PL, Alibhai SMH, Basaria S, D'Amico AV, Kantoff PW, Keating NL, et al. Adverse  
54 481 effects of androgen deprivation therapy and strategies to mitigate them. *Eur Urol*. 2015;67:825–  
55 482 36.

- 1  
2  
3 483 37. Hamdy FC, Donovan JL, Lane JA, Metcalfe C, Davis M, Turner EL, et al. Fifteen-Year  
4 484 Outcomes after Monitoring, Surgery, or Radiotherapy for Prostate Cancer. *N Engl J Med*. 2023.  
5  
6 485 38. Fowler JF. The radiobiology of prostate cancer including new aspects of fractionated  
7 486 radiotherapy. *Acta Oncol*. 2005;44:265–76.  
8  
9 487 39. Hickey BE, James ML, Daly T, Soh F-Y, Jeffery M. Hypofractionation for clinically localized  
10 488 prostate cancer. *Cochrane Database Syst Rev*. 2019;9:CD011462.  
11  
12 489 40. NCCN Guidelines. <https://www.nccn.org/guidelines/nccn-guidelines>. Accessed 13 Apr 2023.  
13  
14 490 41. Wolf F, Sedlmayer F, Aebbersold D, Albrecht C, Böhmer D, Flentje M, et al.  
15 491 Ultrahypofractionation of localized prostate cancer: Statement from the DEGRO working group  
16 492 prostate cancer. *Strahlenther Onkol*. 2021;197:89–96.  
17  
18 493 42. Zerini D, Jereczek-Fossa BA, Fodor C, Bazzani F, Maucieri A, Ronchi S, et al. Salvage  
19 494 image-guided intensity modulated or stereotactic body reirradiation of local recurrence of  
20 495 prostate cancer. *Br J Radiol*. 2015;88:20150197.  
21  
22 496 43. Scher N, Bauduceau O, Bollet M, Lamallem H, Charas T, Garaud P, et al. Stereotactic  
23 497 prostate focal reirradiation therapy for local recurrence: preliminary results of Hartmann  
24 498 Oncology Radiotherapy Group. *BJR Open*. 2019;1:20180027.  
25  
26 499 44. Tree AC, Ostler P, van der Voet H, Chu W, Loblaw A, Ford D, et al. Intensity-modulated  
27 500 radiotherapy versus stereotactic body radiotherapy for prostate cancer (PACE-B): 2-year toxicity  
28 501 results from an open-label, randomised, phase 3, non-inferiority trial. *Lancet Oncol*.  
29 502 2022;23:1308–20.  
30  
31 503 45. Picardi C, Perret I, Miralbell R, Zilli T. Hypofractionated radiotherapy for prostate cancer in  
32 504 the postoperative setting: What is the evidence so far? *Cancer Treat Rev*. 2018;62:91–6.  
33  
34 505 46. Tandberg DJ, Oyekunle T, Lee WR, Wu Y, Salama JK, Koontz BF. Postoperative radiation  
35 506 therapy for prostate cancer: comparison of conventional versus hypofractionated radiation  
36 507 regimens. *Int J Radiat Oncol Biol Phys*. 2018;101:396–405.  
37  
38 508 47. Parikh NR, Kishan AU, Kane N, Diaz-Perez S, Ganapathy E, Nazarian R, et al. Phase 1  
39 509 Trial of Stereotactic Body Radiation Therapy Neoadjuvant to Radical Prostatectomy for Patients  
40 510 With High-Risk Prostate Cancer. *Int J Radiat Oncol Biol Phys*. 2020;108:930–5.  
41  
42 511 48. Sampath S, Frankel P, Vecchio BD, Ruel N, Yuh B, Liu A, et al. Stereotactic Body Radiation  
43 512 Therapy to the Prostate Bed: Results of a Phase 1 Dose-Escalation Trial. *Int J Radiat Oncol Biol*  
44 513 *Phys*. 2020;106:537–45.  
45  
46 514 49. Francolini G, Jereczek-Fossa BA, Di Cataldo V, Simontacchi G, Marvaso G, Gandini S, et  
47 515 al. Stereotactic or conventional radiotherapy for macroscopic prostate bed recurrence: a  
48 516 propensity score analysis. *Radiol Med*. 2022;127:449–57.  
49  
50 517 50. Ma TM, Ballas LK, Wilhalme H, Sachdeva A, Chong N, Sharma S, et al. Quality-of-Life  
51 518 Outcomes and Toxicity Profile Among Patients With Localized Prostate Cancer After Radical  
52 519 Prostatectomy Treated With Stereotactic Body Radiation: The SCIMITAR Multicenter Phase 2  
53 520 Trial. *Int J Radiat Oncol Biol Phys*. 2023;115:142–52.  
54  
55 521  
56  
57  
58  
59  
60

1  
2  
3  
4  
5  
6  
7  
8  
9  
10  
11  
12  
13  
14  
15  
16  
17  
18  
19  
20  
21  
22  
23  
24  
25  
26  
27  
28  
29  
30  
31  
32  
33  
34  
35  
36  
37  
38  
39  
40  
41  
42  
43  
44  
45  
46  
47  
48  
49  
50  
51  
52  
53  
54  
55  
56  
57  
58  
59  
60

522 **Figure ligands:**

523 **Figure 1:** Summary of the study design and schedule.

For peer review only



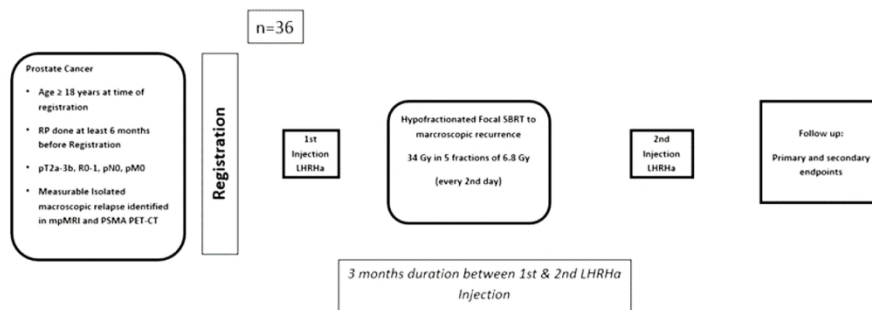

Figure 1: Summary of the study design and schedule.

159x65mm (300 x 300 DPI)

# A single arm phase II trial of ultrahypofractionated focal salvage radiotherapy for isolated prostate bed recurrence after radical prostatectomy

## (HypoFocal SRT Trial)

Study Type: Other Clinical Trial according to ClinO, Chapter 4

Risk Categorisation: Risk category A according to ClinO, Art. 61

Study Registration: Clinicaltrials.gov: **XXXX**  
 Cantonal Ethics Committee Number: KEK-BE 2202-01026

Sponsor-Investigator: Mohamed Shelan, MD  
 Department of Radiation Oncology, Inselspital,  
 Bern University Hospital and University of Bern, Bern,  
 Switzerland.  
 Phone: +41 31 632 24 31  
 Fax: +41 31 632 85 67  
 E-mail: mohamed.shelan@insel.ch

Investigated Intervention: treating isolated prostate bed macroscopic recurrence after radical prostatectomy using ultrahypofractionated radiotherapy.

Protocol ID  
 Version and Date: Version 3.0 (11/11/2022)

### Change history

| Version Nr | Version date | Modified without version change | Description, comments                        | Control |
|------------|--------------|---------------------------------|----------------------------------------------|---------|
| 1.0        | 30.05.2022   |                                 | Initial version                              |         |
| 2.0        | 11.09.2022   | no                              | Amended upon request of the ethics committee | MS      |
| 3.0        | 11.11.2022   | no                              | Amended upon request of the ethics committee | MS      |

---

## CONFIDENTIALITY STATEMENT

The information contained in this document is confidential and the property of the sponsor investigator. The information may not - in full or in part - be transmitted, reproduced, published, or disclosed to others than the applicable competent ethics committees and regulatory authorities without prior written authorization from the sponsor except to the extent necessary to obtain informed consent from those who will participate in the study.

## PROTOCOL SIGNATURE FORM

**Study Title**      A single arm phase II trial of ultrahypofractionated focal salvage radiotherapy for isolated prostate bed recurrence after radical prostatectomy

The Sponsor-Investigator has approved the protocol version 3.0 (11/11/2022) and confirm hereby to conduct the study according to the protocol, current version of the World Medical Association Declaration of Helsinki, and ICH-GCP guidelines as well as the local legally applicable requirements.

### Sponsor Investigator:

Name: Dr. med. Mohamed Shelan

Date: \_\_\_\_\_

Signature: \_\_\_\_\_

**PROTOCOL SIGNATURE FORM FOR LOCAL INVESTIGATOR:**

The local Investigator has approved the protocol version 3.0 (11/11/2022) and confirm hereby to conduct the study according to the protocol, current version of the World Medical Association Declaration of Helsinki, and ICH-GCP guidelines as well as the local legally applicable requirements

**Local Principal Investigator at study site:**

Site:

Principal Investigator:

Date: \_\_\_\_\_ Signature: \_\_\_\_\_

For peer review only

## TABLE OF CONTENTS

|    |                                                                                 |                                           |
|----|---------------------------------------------------------------------------------|-------------------------------------------|
| 1  |                                                                                 |                                           |
| 2  |                                                                                 |                                           |
| 3  |                                                                                 |                                           |
| 4  |                                                                                 |                                           |
| 5  | TABLE OF CONTENTS                                                               | 3                                         |
| 6  | GLOSSARY OF ABBREVIATIONS                                                       | 4                                         |
| 7  | 1 STUDY SYNOPSIS                                                                | 6                                         |
| 8  | 2 BACKGROUND AND RATIONALE                                                      | 11                                        |
| 9  | 3 STUDY OBJECTIVES AND DESIGN                                                   | 15                                        |
| 10 | 3.1 Hypothesis and primary objective                                            | 15                                        |
| 11 | 3.2 Primary and secondary endpoints                                             | 16                                        |
| 12 | 3.3 Study design                                                                | 16                                        |
| 13 | 3.4. Study intervention                                                         | 16                                        |
| 14 | 3.4.1 Pre-registration imaging                                                  | 16                                        |
| 15 | 3.4.2 Radiation treatment (SBRT)                                                | 16                                        |
| 16 | 3.4.3 Androgen deprivation therapy                                              | 18                                        |
| 17 | 4 STUDY POPULATION AND STUDY PROCEDURES                                         | 19                                        |
| 18 | 4.1 Inclusion and exclusion criteria, justification of study population         | 19                                        |
| 19 | Schedule of assessments                                                         | 20                                        |
| 20 | 4.4 Withdrawal and discontinuation                                              | 21                                        |
| 21 | 5 STATISTICS AND METHODOLOGY                                                    | 21                                        |
| 22 | 5.1. Statistical analysis plan and sample size calculation                      | 21                                        |
| 23 | 5.2. Definition of endpoints                                                    | 22                                        |
| 24 | 5.3. Handling of missing data and drop-outs                                     | 23                                        |
| 25 | 6 Regulatory Aspects AND SAFETY                                                 | 23                                        |
| 26 | 6.1 Local regulations / Declaration of Helsinki                                 | 23                                        |
| 27 | 6.2 (Serious) Adverse Events and notification of safety and protective measures | 24                                        |
| 28 | 6.3 (Periodic) safety reporting                                                 | 25                                        |
| 29 | 6.4 Radiation                                                                   | 25                                        |
| 30 | 6.5 Pregnancy                                                                   | 25                                        |
| 31 | 6.6 Amendments                                                                  | 25                                        |
| 32 | 6.7 (Premature) termination of study                                            | 26                                        |
| 33 | 6.8 Insurance                                                                   | 26                                        |
| 34 | 7 FURTHER ASPECTS                                                               | <b>FEHLER! TEXTMARKE NICHT DEFINIERT.</b> |
| 35 | 7.1 Overall ethical considerations                                              | 26                                        |
| 36 | 7.1.1 Patient protection                                                        | 27                                        |
| 37 | 7.1.2 Subject identification                                                    | 27                                        |
| 38 | 7.1.3 Informed consent                                                          | 27                                        |
| 39 | 7.2 Risk-benefit assessment                                                     | 27                                        |
| 40 | 8 QUALITY CONTROL AND DATA PROTECTION                                           | 27                                        |
| 41 | 8.1 Quality measures                                                            | 27                                        |
| 42 | 8.2 Data recording and source data                                              | 28                                        |
| 43 | 8.3 Confidentiality and coding                                                  | 28                                        |
| 44 | 8.4 Retention and destruction of study data                                     | 28                                        |
| 45 | 9 MONITORING AND REGISTRATION                                                   | 29                                        |
| 46 | 10. FUNDING / PUBLICATION / DECLARATION OF INTEREST                             | 29                                        |
| 47 | 11 REFERENCES                                                                   | 29                                        |
| 48 |                                                                                 |                                           |
| 49 |                                                                                 |                                           |
| 50 |                                                                                 |                                           |
| 51 |                                                                                 |                                           |
| 52 |                                                                                 |                                           |
| 53 |                                                                                 |                                           |
| 54 |                                                                                 |                                           |
| 55 |                                                                                 |                                           |
| 56 |                                                                                 |                                           |
| 57 |                                                                                 |                                           |
| 58 |                                                                                 |                                           |
| 59 |                                                                                 |                                           |
| 60 |                                                                                 |                                           |

## GLOSSARY OF ABBREVIATIONS

|                         |                                                                                                               |
|-------------------------|---------------------------------------------------------------------------------------------------------------|
| AE                      | <i>Adverse Event</i>                                                                                          |
| ADC                     | <i>Apparent diffusion coefficient</i>                                                                         |
| ADT                     | <i>Androgen deprivation therapy</i>                                                                           |
| ASR/DSUR                | <i>Annual Safety Report / Development Safety Report</i>                                                       |
| ASTRO/<br>ASCO/AUA      | <i>American societies of radiation oncology, medical oncology and urology</i>                                 |
| BASEC                   | <i>Business Administration System for Ethical Committees</i>                                                  |
| bRFS                    | <i>Biochemical relapse free survival</i>                                                                      |
| CA                      | <i>Clinical approval</i>                                                                                      |
| CBCT                    | <i>Cone Beam CT</i>                                                                                           |
| CEC                     | <i>Clinical ethics committee</i>                                                                              |
| ClinO                   | <i>Ordinance on Clinical Trials in Human Research (in German: KlinV, in French: OClin, in Italian: OSRUm)</i> |
| CRF                     | <i>Case Report Form</i>                                                                                       |
| CTCAE                   | <i>Common Terminology Criteria for Adverse Events</i>                                                         |
| CTU                     | <i>Clinical trials unit</i>                                                                                   |
| CTV                     | <i>Clinical target volume</i>                                                                                 |
| DCE                     | <i>Dynamic contrast enhancement</i>                                                                           |
| DEGRO                   | <i>German society of radiation oncology</i>                                                                   |
| DFS                     | <i>Disease free survival</i>                                                                                  |
| DRE                     | <i>Digital rectal examination</i>                                                                             |
| DVH                     | <i>Dose volume histogram</i>                                                                                  |
| DWI                     | <i>Diffusion-weighted imaging</i>                                                                             |
| EAU                     | <i>European association of urology</i>                                                                        |
| EORTC                   | <i>European organisation for research and treatment of cancer</i>                                             |
| <sup>18</sup> F         | <i>Fluorine-18</i>                                                                                            |
| FADP                    | <i>Federal Act on Data Protection (in German: DSGVO, in French: LPD, in Italian: LPD)</i>                     |
| FOPH                    | <i>Federal Office of Public Health</i>                                                                        |
| <sup>18</sup> F- DCFPYL | <i>Pylarify - piflufolastat Fluorine-18</i>                                                                   |
| eCRF                    | <i>Electronic Case Report Form</i>                                                                            |
| <sup>68</sup> Ga        | <i>Gallium-68</i>                                                                                             |
| GCP                     | <i>Good Clinical Practice</i>                                                                                 |
| GTV                     | <i>Gross tumor volume</i>                                                                                     |
| GI                      | <i>Gastrointestinal</i>                                                                                       |
| GU                      | <i>Genitourinary</i>                                                                                          |
| HR                      | <i>Hazard ratio</i>                                                                                           |
| HRA                     | <i>Human Research Act (in German: HFG, in French: LRH, in Italian: LRUm)</i>                                  |
| ICH                     | <i>International Conference on Harmonisation</i>                                                              |
| IGRT                    | <i>Image guided radiotherapy</i>                                                                              |
| IMRT                    | <i>Intensity modulated radiotherapy</i>                                                                       |

|    |               |                                                      |
|----|---------------|------------------------------------------------------|
| 1  |               |                                                      |
| 2  |               |                                                      |
| 3  | <i>LHRH</i>   | <i>Luteinizing hormone releasing hormone</i>         |
| 4  | <i>LHRHa</i>  | <i>Luteinizing hormone releasing hormone agonist</i> |
| 5  | <i>MFS</i>    | <i>Metastasis free survival</i>                      |
| 6  | <i>mpMRI</i>  | <i>Multiparametric magnetic resonance imaging</i>    |
| 7  | <i>MRI</i>    | <i>Magnetic resonance imaging</i>                    |
| 8  | <i>NCI</i>    | <i>National cancer institute</i>                     |
| 9  | <i>NTCP</i>   | <i>Normal tissue complication probability</i>        |
| 10 | <i>NTD</i>    | <i>Normalized total dose</i>                         |
| 11 | <i>NCCN</i>   | <i>National comprehensive cancer network</i>         |
| 12 | <i>OAR</i>    | <i>Organs at risk</i>                                |
| 13 | <i>OS</i>     | <i>Overall survival</i>                              |
| 14 | <i>OSEM</i>   | <i>Ordered subset expectation maximization</i>       |
| 15 | <i>PET/CT</i> | <i>Positron electron computed tomography</i>         |
| 16 | <i>PFS</i>    | <i>Progression-free survival</i>                     |
| 17 | <i>PI</i>     | <i>Principal Investigator</i>                        |
| 18 | <i>PRV</i>    | <i>Planning organ at risk volume</i>                 |
| 19 | <i>PSA</i>    | <i>Prostate specific antigen</i>                     |
| 20 | <i>PSF</i>    | <i>Point-spread-function</i>                         |
| 21 | <i>PSMA</i>   | <i>Prostate-specific membrane antigen</i>            |
| 22 | <i>PTV</i>    | <i>Planning target volume</i>                        |
| 23 | <i>RP</i>     | <i>Radical prostatectomy</i>                         |
| 24 | <i>RT</i>     | <i>Radiotherapy</i>                                  |
| 25 | <i>RTOG</i>   | <i>Radiation therapy oncology group</i>              |
| 26 | <i>SAE</i>    | <i>Serious Adverse Event</i>                         |
| 27 | <i>SBRT</i>   | <i>Stereotactic body radiotherapy</i>                |
| 28 | <i>SI</i>     | <i>Signal intensity</i>                              |
| 29 | <i>SRT</i>    | <i>Salvage radiotherapy</i>                          |
| 30 | <i>TLC</i>    | <i>Thin layer chromatography</i>                     |
| 31 | <i>TMF</i>    | <i>Trial master file</i>                             |
| 32 | <i>TNM</i>    | <i>Tumor Nodes Metastases</i>                        |
| 33 | <i>TOF</i>    | <i>Time of flight</i>                                |
| 34 | <i>UICC</i>   | <i>Union internationale contre le cancer</i>         |
| 35 | <i>UPN</i>    | <i>Unique Patient Number</i>                         |
| 36 | <i>VUA</i>    | <i>Vesicourethral anastomosis</i>                    |
| 37 | <i>WHO</i>    | <i>World health organization</i>                     |
| 38 | <i>QLQ</i>    | <i>Quality of life questionnaire</i>                 |
| 39 | <i>QoL</i>    | <i>Quality of life</i>                               |
| 40 |               |                                                      |
| 41 |               |                                                      |
| 42 |               |                                                      |
| 43 |               |                                                      |
| 44 |               |                                                      |
| 45 |               |                                                      |
| 46 |               |                                                      |
| 47 |               |                                                      |
| 48 |               |                                                      |
| 49 |               |                                                      |
| 50 |               |                                                      |
| 51 |               |                                                      |
| 52 |               |                                                      |
| 53 |               |                                                      |
| 54 |               |                                                      |
| 55 |               |                                                      |
| 56 |               |                                                      |
| 57 |               |                                                      |
| 58 |               |                                                      |
| 59 |               |                                                      |
| 60 |               |                                                      |



## 1 STUDY SYNOPSIS

|                                       |                                                                                                                                                                                                                                                                                                                                                                                                                                                                                                                                                                                                                                                                                                                                                                                                                                                                                                                                                                                                                                                                                                                                                                                                                                                                                                                                                                                                                                                                                                                                                                                                                                                                                                                                                                                                                                                                                                                                                                                                                                                                                                                                                                                               |
|---------------------------------------|-----------------------------------------------------------------------------------------------------------------------------------------------------------------------------------------------------------------------------------------------------------------------------------------------------------------------------------------------------------------------------------------------------------------------------------------------------------------------------------------------------------------------------------------------------------------------------------------------------------------------------------------------------------------------------------------------------------------------------------------------------------------------------------------------------------------------------------------------------------------------------------------------------------------------------------------------------------------------------------------------------------------------------------------------------------------------------------------------------------------------------------------------------------------------------------------------------------------------------------------------------------------------------------------------------------------------------------------------------------------------------------------------------------------------------------------------------------------------------------------------------------------------------------------------------------------------------------------------------------------------------------------------------------------------------------------------------------------------------------------------------------------------------------------------------------------------------------------------------------------------------------------------------------------------------------------------------------------------------------------------------------------------------------------------------------------------------------------------------------------------------------------------------------------------------------------------|
| <b>Sponsor / Sponsor-Investigator</b> | Mohamed Shelan, MD                                                                                                                                                                                                                                                                                                                                                                                                                                                                                                                                                                                                                                                                                                                                                                                                                                                                                                                                                                                                                                                                                                                                                                                                                                                                                                                                                                                                                                                                                                                                                                                                                                                                                                                                                                                                                                                                                                                                                                                                                                                                                                                                                                            |
| <b>Study Title:</b>                   | A single arm phase II trial of ultrahypofractionated focal salvage radiotherapy for isolated prostate bed recurrence after radical prostatectomy                                                                                                                                                                                                                                                                                                                                                                                                                                                                                                                                                                                                                                                                                                                                                                                                                                                                                                                                                                                                                                                                                                                                                                                                                                                                                                                                                                                                                                                                                                                                                                                                                                                                                                                                                                                                                                                                                                                                                                                                                                              |
| <b>Short Title / Study ID:</b>        | HypoFocal-SRT                                                                                                                                                                                                                                                                                                                                                                                                                                                                                                                                                                                                                                                                                                                                                                                                                                                                                                                                                                                                                                                                                                                                                                                                                                                                                                                                                                                                                                                                                                                                                                                                                                                                                                                                                                                                                                                                                                                                                                                                                                                                                                                                                                                 |
| <b>Protocol Version and Date:</b>     | Ver. 3.0 date 11.11.2022                                                                                                                                                                                                                                                                                                                                                                                                                                                                                                                                                                                                                                                                                                                                                                                                                                                                                                                                                                                                                                                                                                                                                                                                                                                                                                                                                                                                                                                                                                                                                                                                                                                                                                                                                                                                                                                                                                                                                                                                                                                                                                                                                                      |
| <b>Trial registration:</b>            | <a href="http://www.clinicaltrials.gov">www.clinicaltrials.gov</a> . Registration will be completed after the Ethic committee approval                                                                                                                                                                                                                                                                                                                                                                                                                                                                                                                                                                                                                                                                                                                                                                                                                                                                                                                                                                                                                                                                                                                                                                                                                                                                                                                                                                                                                                                                                                                                                                                                                                                                                                                                                                                                                                                                                                                                                                                                                                                        |
| <b>Study category and Rationale</b>   | <p>Category A</p> <p>Ultrahypofractionated radiotherapy is not a standard of care in patients with local recurrence after radical prostatectomy. However, based on published data from retrospective series and phase I trial using a similar or higher fractionation scheme to the one used in this trial, toxicity is not expected to be higher than in case of normofractionated salvage radiotherapy. In terms of tumor control outcome, a benefit of hypofractionation can be expected due to the low <math>\alpha/\beta</math> value of prostate cancer.</p>                                                                                                                                                                                                                                                                                                                                                                                                                                                                                                                                                                                                                                                                                                                                                                                                                                                                                                                                                                                                                                                                                                                                                                                                                                                                                                                                                                                                                                                                                                                                                                                                                            |
| <b>Clinical Phase:</b>                | Phase II                                                                                                                                                                                                                                                                                                                                                                                                                                                                                                                                                                                                                                                                                                                                                                                                                                                                                                                                                                                                                                                                                                                                                                                                                                                                                                                                                                                                                                                                                                                                                                                                                                                                                                                                                                                                                                                                                                                                                                                                                                                                                                                                                                                      |
| <b>Background and Rationale:</b>      | <p>Radical prostatectomy and radiotherapy (RT) are the considered as backbones for treating localized disease<sup>1</sup>. However radical prostatectomy, 30 – 60% of patients will develop recurrent disease<sup>2,3</sup>. Several large randomized controlled trials have shown a benefit of postoperative radiation therapy in patients with a high risk of local recurrence after RPE, e.g. pT3 disease or positive resection margins<sup>4-8</sup>. In the era of high sensitivity PSA and PSMA-PET/CT, there has been additional evidence suggesting a similar oncological outcome if patients are treated with early salvage radiotherapy in case of a rising PSA after RPE instead of immediate adjuvant radiotherapy<sup>9-12</sup>. However, the above mentioned studies as well as the studies including patients receiving salvage radiotherapy in case of a macroscopic tumor recurrence in the prostate bed were done with conventionally fractionated radiotherapy, usually in 2 Gy per fraction<sup>4-12</sup>.</p> <p>In the setting of definite radiotherapy to the prostate, ultrahypofractionated radiotherapy has been used as a treatment option in patients with low or intermediate risk for a long time and there are published data with a reasonable follow up that shows excellent biochemical control with low high grade toxicity rates<sup>13-20</sup>. In addition, data on ultrahypofractionated in high-risk patients are emerging with several large trials being published with encouraging results<sup>21-26</sup>. The rationale for using ultrahypofractionated in patients treated for prostate cancer is the estimated low <math>\alpha/\beta</math> value of around 1.5 Gy<sup>27,28</sup>. Therefore, using a larger fraction dose is expected to improve the therapeutic ratio and consequently the probability of tumor control.</p> <p>Although Data on moderate hypofractionation in the setting of postoperative radiotherapy with a fraction dose of up to 3 Gy per fraction does not seem to support this concern, given the low toxicity rates that were reported in several analyses<sup>29-38</sup>. However, data on postoperative</p> |

|                                 |                                                                                                                                                                                                                                                                                                                                                                                                                                                                                                                                                                                                                                                                                                                                                                                                                                                                                                                                                                                                                                                                                                                                                                                                                                                                                                                                                                                                                                                                                                                                                                                                                                                                                                                                                                                                                                                                                                                                       |
|---------------------------------|---------------------------------------------------------------------------------------------------------------------------------------------------------------------------------------------------------------------------------------------------------------------------------------------------------------------------------------------------------------------------------------------------------------------------------------------------------------------------------------------------------------------------------------------------------------------------------------------------------------------------------------------------------------------------------------------------------------------------------------------------------------------------------------------------------------------------------------------------------------------------------------------------------------------------------------------------------------------------------------------------------------------------------------------------------------------------------------------------------------------------------------------------------------------------------------------------------------------------------------------------------------------------------------------------------------------------------------------------------------------------------------------------------------------------------------------------------------------------------------------------------------------------------------------------------------------------------------------------------------------------------------------------------------------------------------------------------------------------------------------------------------------------------------------------------------------------------------------------------------------------------------------------------------------------------------|
|                                 | <p>ultrahypofractionated radiotherapy to the prostate bed remains immature. The rates of acute and late toxicities following ultrahypofractionated radiotherapy to the prostate bed were reported in retrospective and phase I studies are within the above mentioned ranges. The rate of acute <math>\geq</math> G2 GI and GU toxicities range from 0 – 50 % and 0 – 33.3 % and for late <math>\geq</math> G2 GI and GU toxicities from 0 – 11.5 % and 0 – 38.5 %<sup>39–48</sup>. This data suggests that SBRT to the prostate bed can be applied with toxicity rates similar to that of normofractionated or mildly hypofractionated radiotherapy</p> <p>Further improvement in the oncological outcomes can be expected through technological developments in radiotherapy delivery and precise targeting of the local relapses in the prostate bed. A SRT using a ultrahypofractionated schedule delivered precisely in 5 fractions and limited only to the site of isolated macroscopic recurrence in the prostate bed as defined by PSMA-PET and multiparametric MRI (mpMRI) may represent a valid treatment strategy to improve the therapeutic ratio in these patients (short overall treatment time, better sparing of surrounding healthy tissues, increased dose to the target volume).</p> <p><b>Rationale for combining ADT to SRT</b></p> <ul style="list-style-type: none"> <li>- The benefit of ADT to salvage radiation has been demonstrated in two randomized phase III trials, RTOG 9601 and GETUG 16, which provided evidence of improved metastasis-free and overall survival and durable biochemical disease control with bicalutamide for 24 mo and ADT using LHRH agonists for 6 months, respectively.</li> <li>- These studies support the current National Comprehensive Cancer Network (NCCN) guidelines to consider combination of 6–24 months of hormonal therapy with SRT in this setting.</li> </ul> |
| Objective(s):                   | The main objective of the trial is to explore the efficacy and safety of combining short-term ADT over 6 months to focal ultrahypofractionated SRT delivered in 5 fractions to the site of local recurrence within the prostate bed after radical prostatectomy where mpMRI and PSMA PET/CT are used to precisely identify the local recurrence and compare it to previously published literature.                                                                                                                                                                                                                                                                                                                                                                                                                                                                                                                                                                                                                                                                                                                                                                                                                                                                                                                                                                                                                                                                                                                                                                                                                                                                                                                                                                                                                                                                                                                                    |
| Outcome(s):                     | <p>Primary endpoints:</p> <ul style="list-style-type: none"> <li>- Biochemical relapsefree survival at 2 years</li> </ul> <p>Secondary endpoints:</p> <ul style="list-style-type: none"> <li>- Acute side effects (till 90 days after end of radiation) of grade 3 or higher based on CTCAE v5</li> <li>- Clinical progression-free survival</li> <li>- Metastasis-free survival</li> <li>- Late side effects</li> <li>- Quality of life (based on EORTC QLQ-C30, QLQ-PR25)</li> </ul>                                                                                                                                                                                                                                                                                                                                                                                                                                                                                                                                                                                                                                                                                                                                                                                                                                                                                                                                                                                                                                                                                                                                                                                                                                                                                                                                                                                                                                                |
| Study design:                   | This a single arm, prospective, phase II multicenter study                                                                                                                                                                                                                                                                                                                                                                                                                                                                                                                                                                                                                                                                                                                                                                                                                                                                                                                                                                                                                                                                                                                                                                                                                                                                                                                                                                                                                                                                                                                                                                                                                                                                                                                                                                                                                                                                            |
| Inclusion / Exclusion criteria: | <p><b>Inclusion criteria:</b></p> <ol style="list-style-type: none"> <li>1. Written informed consent according to ICH/GCP regulations before registration and prior to any trial specific procedures</li> <li>2. Age <math>\geq</math> 18 years at time of registration</li> <li>3. WHO performance status 0-1</li> <li>4. Lymph node negative adenocarcinoma of the prostate treated with radical prostatectomy (RP) at least 6 months before trial</li> </ol>                                                                                                                                                                                                                                                                                                                                                                                                                                                                                                                                                                                                                                                                                                                                                                                                                                                                                                                                                                                                                                                                                                                                                                                                                                                                                                                                                                                                                                                                       |

|                                            |                                                                                                                                                                                                                                                                                                                                                                                                                                                                                                                                                                                                                                                                                                                                                                                                                                                                                                                                                                                                                                                                                                                                                                                                                                                                                                                                                                                                                                                                                                                                                                                                                                                                                                                                                                                                                                                                                               |
|--------------------------------------------|-----------------------------------------------------------------------------------------------------------------------------------------------------------------------------------------------------------------------------------------------------------------------------------------------------------------------------------------------------------------------------------------------------------------------------------------------------------------------------------------------------------------------------------------------------------------------------------------------------------------------------------------------------------------------------------------------------------------------------------------------------------------------------------------------------------------------------------------------------------------------------------------------------------------------------------------------------------------------------------------------------------------------------------------------------------------------------------------------------------------------------------------------------------------------------------------------------------------------------------------------------------------------------------------------------------------------------------------------------------------------------------------------------------------------------------------------------------------------------------------------------------------------------------------------------------------------------------------------------------------------------------------------------------------------------------------------------------------------------------------------------------------------------------------------------------------------------------------------------------------------------------------------|
|                                            | <p>registration. Tumor stage pT2a-3b, R0-1, pN0 or cN0 according to the UICC TNM 2009.</p> <ol style="list-style-type: none"> <li>5. Evidence of measurable local recurrence at the prostate bed detected by PSMA PET/CT and mpMRI within the last 3 months. In case of unclear local recurrence, a biopsy confirmation is recommended.</li> <li>6. Patient must have non-metastatic (N0, M0) disease, as defined by a lack of nodal or distant metastases seen on PSMA PET/CT scan</li> <li>7. Patients must have non-castrate levels of serum testosterone (<math>\geq 50</math> ng/dL).</li> <li>8. Patients must not have previously received hormonal therapy (LHRH agonists, antiandrogen, or both, or bilateral orchiectomy).</li> <li>9. Absence of any psychological, familial, sociological or geographical condition potentially hampering compliance with the study protocol and follow-up schedule; those conditions should be discussed with the patient before registration in the trial</li> </ol> <p><b>Exclusion criteria:</b></p> <ol style="list-style-type: none"> <li>1. Persistent PSA (<math>&gt; 0.4</math> ng/mL) 4 to 20 weeks after RP</li> <li>2. Previous hematologic or primary solid malignancy within 3 years prior registration with the exception of curatively treated localized non-melanoma skin cancer</li> <li>3. Usage of products known to affect PSA levels within 4 weeks prior to start of trial treatment phase including any form of androgen suppression agents and androgen deprivation therapy</li> <li>4. Bilateral hip prosthesis</li> <li>5. Severe or active co-morbidity likely to impact on the advisability of SRT</li> <li>6. Treatment with any experimental drug or participation within a clinical trial within 30 days prior to registration (exception: concurrent participation in the biobank studies is allowed)</li> </ol> |
| <p><b>Measurements and procedures:</b></p> | <p><b>Investigations to be performed within 12 weeks prior to registration:</b></p> <ul style="list-style-type: none"> <li>- Physical examinations including Digital rectal examination (DRE)</li> <li>- Multi-parametric MRI</li> <li>- PSMA PET/CT.</li> </ul> <p><b>Investigations during trial treatment phase</b></p> <ul style="list-style-type: none"> <li>- Planning CT</li> <li>- Multi-parametric MRI if not yet performed</li> <li>- Serum PSA</li> <li>- Total testosterone,</li> <li>- Assessment of recurrences in case of suspected progression</li> </ul> <p><b>During follow-up:</b></p> <ul style="list-style-type: none"> <li>- Physical examinations</li> <li>- Digital rectal examination (if suspected clinical progression),</li> <li>- serum PSA</li> <li>- Total testosterone</li> <li>- Assessment of recurrences with PSMA PET/CT imaging (local, regional, distant)</li> </ul> <p><b>All adverse events are collected throughout the trial.</b></p>                                                                                                                                                                                                                                                                                                                                                                                                                                                                                                                                                                                                                                                                                                                                                                                                                                                                                                               |

|                                               |                                                                                                                                                                                                                                                                                                                                                                                                                                                                                                                                                                                                                                                                                                                                                                                                                                                                                                                                                                                                                                                                                                                                                                                                                                                                                                                                                                                                                                                                                                                                                                                                                                                                                              |
|-----------------------------------------------|----------------------------------------------------------------------------------------------------------------------------------------------------------------------------------------------------------------------------------------------------------------------------------------------------------------------------------------------------------------------------------------------------------------------------------------------------------------------------------------------------------------------------------------------------------------------------------------------------------------------------------------------------------------------------------------------------------------------------------------------------------------------------------------------------------------------------------------------------------------------------------------------------------------------------------------------------------------------------------------------------------------------------------------------------------------------------------------------------------------------------------------------------------------------------------------------------------------------------------------------------------------------------------------------------------------------------------------------------------------------------------------------------------------------------------------------------------------------------------------------------------------------------------------------------------------------------------------------------------------------------------------------------------------------------------------------|
| <b>Control Intervention (if applicable):</b>  | This is a single arm study. Control intervention is not applicable.                                                                                                                                                                                                                                                                                                                                                                                                                                                                                                                                                                                                                                                                                                                                                                                                                                                                                                                                                                                                                                                                                                                                                                                                                                                                                                                                                                                                                                                                                                                                                                                                                          |
| <b>Number of Participants with Rationale:</b> | It is planned to enrol a total of 36 patients in the trial (see statistical considerations for rationale).                                                                                                                                                                                                                                                                                                                                                                                                                                                                                                                                                                                                                                                                                                                                                                                                                                                                                                                                                                                                                                                                                                                                                                                                                                                                                                                                                                                                                                                                                                                                                                                   |
| <b>Study Duration:</b>                        | Expected accrual time: 18 Months                                                                                                                                                                                                                                                                                                                                                                                                                                                                                                                                                                                                                                                                                                                                                                                                                                                                                                                                                                                                                                                                                                                                                                                                                                                                                                                                                                                                                                                                                                                                                                                                                                                             |
| <b>Study Schedule:</b>                        | First-Participant-In: Q4 2022<br>Last-Participant-Out: Q4 2027                                                                                                                                                                                                                                                                                                                                                                                                                                                                                                                                                                                                                                                                                                                                                                                                                                                                                                                                                                                                                                                                                                                                                                                                                                                                                                                                                                                                                                                                                                                                                                                                                               |
| <b>Investigator(s):</b>                       | <p><b>Dr. med. Mohamed Shelan</b><br/>Department of Radiation Oncology<br/>Inselspital, Bern University Hospital<br/>Bern, Switzerland.<br/>Phone: 031 632 29 70<br/>E-Mail: <a href="mailto:mohamed.shelan@insel.ch">mohamed.shelan@insel.ch</a></p> <p><b>Prof. Dr. med. Daniel M. Aebbersold</b><br/>Department of Radiation Oncology<br/>Inselspital, Bern University Hospital<br/>Bern, Switzerland.<br/>Phone: 031 632 24 31<br/>E-Mail: <a href="mailto:daniel.aebbersold@insel.ch">daniel.aebbersold@insel.ch</a></p> <p><b>Jens Lustenberger</b><br/>Department of Radiation Oncology<br/>Unispital Basel<br/>E-Mail: <a href="mailto:jens.lustenberger@usb.ch">jens.lustenberger@usb.ch</a></p> <p><b>Prof. Dr. Daniel R. Zwahlen</b><br/>Department of Radiation Oncology<br/>Kantonsspital Winterthur<br/>Phone: 079 553 25 63<br/>E-Mail: <a href="mailto:daniel.zwahlen@ksw.ch">daniel.zwahlen@ksw.ch</a></p> <p><b>Prof. Dr. med. Thomas Zilli</b><br/>Clinica di Radio-Oncologia<br/>Istituto Oncologico della Svizzera Italiana-Ente Ospedaliero Cantonale (IOSI-EOC)<br/>Phone: 091/811 96 35<br/>E-Mail: <a href="mailto:Thomas.Zilli@eoc.ch">Thomas.Zilli@eoc.ch</a></p> <p><b>Dr. med. Alexander Althaus</b><br/>Department of Radiation Oncology<br/>Inselspital, Bern University Hospital<br/>Bern, Switzerland.<br/>Phone: 031 632 29 70<br/>Email: <a href="mailto:alexander.althaus@insel.ch">alexander.althaus@insel.ch</a></p> <p><b>Dr. med. Hendrik Gabriel Rathke</b><br/>Department of Nuclear Medicine<br/>Inselspital, Bern University Hospital<br/>Bern, Switzerland.<br/>Email: <a href="mailto:hendrik.rathke@insel.ch">hendrik.rathke@insel.ch</a></p> |
| <b>Study Centre(s):</b>                       | Multi-centre study. At least 4 recruiting centers in Switzerland.                                                                                                                                                                                                                                                                                                                                                                                                                                                                                                                                                                                                                                                                                                                                                                                                                                                                                                                                                                                                                                                                                                                                                                                                                                                                                                                                                                                                                                                                                                                                                                                                                            |
| <b>Statistical Considerations:</b>            | According to the published prospective trials and retrospective series reporting the outcome of the normofractionated SRT, we define                                                                                                                                                                                                                                                                                                                                                                                                                                                                                                                                                                                                                                                                                                                                                                                                                                                                                                                                                                                                                                                                                                                                                                                                                                                                                                                                                                                                                                                                                                                                                         |

|                       |                                                                                                                                                                                                                                                                                                                                                                                                                                                                                                                                                                                                                                                                                                                                                                                                                                                                                                                                                                                                                                                                                                                                                                                                                                                                                             |
|-----------------------|---------------------------------------------------------------------------------------------------------------------------------------------------------------------------------------------------------------------------------------------------------------------------------------------------------------------------------------------------------------------------------------------------------------------------------------------------------------------------------------------------------------------------------------------------------------------------------------------------------------------------------------------------------------------------------------------------------------------------------------------------------------------------------------------------------------------------------------------------------------------------------------------------------------------------------------------------------------------------------------------------------------------------------------------------------------------------------------------------------------------------------------------------------------------------------------------------------------------------------------------------------------------------------------------|
|                       | <p>biochemical relapse free survival at 2 years of 60% as poor and of 80% as promising outcome that would justify further investigation. We will therefore test the null hypothesis that the biochemical relapse free survival at 2 years is lower than 60% against the alternative that it is at least 80%. Based on a one-sample binomial exact test with a one-sided alpha of 5%, 36 patients are required to reach a power of 80%. The null hypothesis will be rejected if at least 27 patients show biochemical relapse free survival at 2 years.</p> <p>We will control the safety of the intervention during the trial by assessing acute side effects (grade 3 or higher) at 90 days after 12 and 24 patients. The trial will be stopped if there is evidence that the proportion of patients with acute side effects is larger than 27%, the proportion observed that will be tested using one-sample binomial exact tests with a one-sided alpha of 5%.</p> <p>Time-to-event outcomes will be analyzed using Kaplan-Meier-curves, the proportion of responders at 1 and 2 years, and the restricted mean survival time at 1 and 2 years with 95% confidence interval. Binary outcomes will be reported using absolute and relative frequencies with 95% confidence intervals.</p> |
| <b>GCP Statement:</b> | This study will be conducted in compliance with the protocol, the current version of the Declaration of Helsinki, the ICH-GCP or ISO EN 14155 (as far as applicable) as well as all national legal and regulatory requirements.                                                                                                                                                                                                                                                                                                                                                                                                                                                                                                                                                                                                                                                                                                                                                                                                                                                                                                                                                                                                                                                             |

## 2 BACKGROUND AND RATIONALE

### 2.1 Disease background

Prostate cancer is the most common non-cutaneous malignancy in men. An estimated 1.1 million patients per year worldwide were diagnosed with prostate cancer, accounting for 15% of the cancers diagnosed in men, with almost 70% of the cases occurring in more developed regions. Prostate cancer is the fifth leading cause of cancer death in men, representing 6.6% of the total male cancer mortality<sup>49</sup>.

The most common curative therapeutic modalities for localized prostate cancers include radical prostatectomy (RP) and radiotherapy with or without androgen deprivation therapy. Although there is a wide variability between treatment site and risk groups, approximately 50% of all men with localized prostate cancer undergo RP<sup>50</sup>. After RP, between 30-60% of men can develop a biochemical relapse within 5 years<sup>51-54</sup>. The site of relapse in prostate cancer patients after RP is predominantly local, with a low incidence of distant failures<sup>55</sup>. Within patients with biochemical relapse the actuarial rate of bone metastasis is 37% and 65% at 5 years and 10 years, respectively. The median time to development of bone metastasis after biochemical relapse is 8 years and the median time between development of bone metastasis and death is 5 years<sup>56</sup>.

### 2.2 Therapy background

#### 2.2.1 The use of adjuvant and salvage radiotherapy after radical prostatectomy

Adverse pathological factors after prostatectomy, such as positive surgical margins, extracapsular extension, or seminal vesicle invasion, increase the likelihood of disease recurrence. Three randomized clinical trials have demonstrated the benefits of adjuvant radiotherapy after RP for patients with adverse pathological features<sup>5,8,57</sup>. The most consistent findings were an improvement in biochemical relapse free survival across all three trials and improvements in loco-regional and clinical relapse free survival in the two trials that reported these outcomes. Although there was an improvement in overall survival in one of the studies<sup>57</sup>, the use of adjuvant radiotherapy is not unanimously accepted<sup>58</sup>. Two of these studies have included patients with a detectable prostate-specific antigen (PSA) at the time of adjuvant treatment; therefore, these patients received salvage treatment by definition. As such, many clinicians offer salvage radiotherapy (SRT) to patients with biochemical progression instead of adjuvant radiotherapy. The main advantage of salvage versus adjuvant radiotherapy is the avoidance of a potential overtreatment in cases that would never relapse after surgery, even in the presence of high-risk pathological features<sup>59</sup>. Recently, prospective randomized trials, systematic review, and meta-analysis suggest that adjuvant radiotherapy does not improve event-free survival in men with localized or locally advanced prostate cancer. Until data on long-term outcomes are available, early salvage treatment would seem the preferable treatment policy as it offers the opportunity to spare many men radiotherapy and its associated side-effects<sup>9,10,12</sup>.

Predictors of response to salvage radiotherapy were examined by Stephenson et al.<sup>60</sup> and they found that high Gleason score, high pre-radiotherapy PSA, negative RP surgical margins, short PSA doubling time, and seminal vesicle involvement were independently associated with adverse outcomes. A contemporary update of the original Stephenson predictive nomogram including patients treated with early SRT (at a PSA  $\leq$  0.2 ng/mL) showed that early SRT at low PSA levels after RP is associated with improved freedom from biochemical relapse and distant metastases rates<sup>61</sup>.

#### 2.2.2 Optimizing salvage radiotherapy with androgen deprivation therapy

Prospective studies have shown that androgen deprivation therapy (ADT) combined with primary radiotherapy for intermediate- and high-risk prostate cancers improves overall survival<sup>62</sup>. The combination of ADT to radiation in the postoperative setting was for long time a matter of debate. Recently the results of prospective phase III randomized were published demonstrating a benefit of the combined treatment<sup>63,64</sup>. In the RTOG 9601, 771 men with an elevated serum PSA following radical prostatectomy were randomly assigned to radiation plus the anti-androgen bicalutamide for two years or radiation alone. The first interim results at a median follow up of 7 years were negative for the primary endpoint, overall survival; however, the latest report at a median follow-up of 12.6 years showed an actuarial 10-year overall survival of 82% for salvage radiation plus ADT and 78% for salvage radiation plus placebo (HR: 0.75; 95% CI: 0.58-0.98)<sup>63</sup>.



1  
2  
3 The GETUG-AFU 16 is a phase III study that randomized men with biochemical failure after surgery to  
4 salvage radiation alone versus salvage radiation combined with 6 months of LHRH agonists. The 10 years  
5 results showed that SRT combined with short-term androgen suppression significantly reduced risk of  
6 biochemical or clinical progression and death compared with salvage radiotherapy alone. The results of the  
7 GETUG-AFU 16 trial confirm the efficacy of androgen suppression plus radiotherapy as salvage treatment  
8 in patients with increasing PSA concentration after RP for prostate cancer <sup>64</sup>.

9 Finally, it is worth to mention that, the current National Comprehensive Cancer Network (NCCN) guidelines  
10 recommend a duration of 6–24 months of ADT combined SRT.

## 11 12 **2.3. Role of new imaging modalities in identifying local recurrence after RP**

### 13 14 **2.3.1 The role for MRI in the identification of prostate cancer recurrence after RP**

15  
16 In men with biochemical recurrence following local treatment with curative intent for prostate cancer, it is  
17 important to identify those who will likely benefit from local salvage therapy. Imaging should provide a step-  
18 by-step multimodal approach that facilitates both local and systemic staging. Clinical guidelines recommend  
19 the use of both nuclear medicine imaging (positron emission tomography [PET] / computed tomography  
20 [CT] scans) and magnetic resonance imaging (MRI) to assess local recurrence and distant metastases <sup>65,66</sup>  
21 Multiparametric MRI (mpMRI) is accurate in early detection of prostate cancer local recurrence after RT  
22 and RP <sup>66</sup>. T2w sequences very accurately represent the postsurgical anatomy. In most cases, a local  
23 recurrence differs from normal postoperative inflammation and fibrosis. Fibrotic tissue has a lower signal  
24 intensity (SI) than recurrent tissue <sup>67</sup>. Recurrent tissue can have various forms, including curly, semi-  
25 circular, nodular, and plaque-like masses. In the case of asymmetric perianastomotic soft-tissue thickening  
26 with an SI in between the SIs for pelvic muscle and the surrounding adipose tissue, a local recurrence is  
27 likely to be present <sup>68</sup>. Functional criteria are based on diffusion-weighted imaging (DWI) and dynamic  
28 contrast enhancement (DCE), which represent the cellularity and vascularity of the tissue, respectively.  
29 DWI has good diagnostic accuracy in detecting local recurrence after RP when combined with other  
30 sequences<sup>68</sup>. Quite often, there is geometric distortion caused by susceptibility artefacts due to surgical  
31 clips. Local recurrence after RP, like primary tumours, shows high SI on high b-value DWI and low ADC  
32 values. In the case of artefact-altered DWI, DCE MRI is of particular importance<sup>69</sup>. DCE imaging plays the  
33 dominant role in the detection of RP recurrence. This technique has high sensitivity <sup>70–72</sup>; even tiny  
34 recurrence “foci” that may not be visible on T2WI tend to show significant enhancement in the early arterial  
35 phase, often with contrast wash-out <sup>66</sup>. In addition, post-RP recurrences enhance sooner and faster than  
36 normal postoperative changes <sup>73</sup>.

### 37 38 **2.3.2 Role of PSMA PET CT in Identification of local recurrence**

39  
40 In case of PSA recurrence, SRT is the only curative option, resulting in approximately 60% of the patients  
41 re-achieving an undetectable PSA. After 5 years, 80% of these men are free from progression<sup>74</sup>. The pre-  
42 SRT PSA level is a significant factor of progression, with more favorable results for patients with low PSA  
43 levels (0.5 ng/mL or less)<sup>61,75</sup>. Accordingly, European guidelines (EAU) recommend early SRT at a PSA  
44 <0.5 ng/mL. At the same time, use of restaging PSMA PET/CT is recommended by the 2021 EAU  
45 guidelines for patients with a relapsing PSA > 0.2 ng/mL. However, for clinical and imaging purposes, it is  
46 important to distinguish between two types of local recurrence and relapse outside tumor bed.

47  
48 At PSA levels <1 ng/mL, most imaging methods are not suitable to detect the correlate for disease  
49 progression. Therefore, up to 20% of patients with SRT to the prostate bed (with or without including original  
50 seminal vesicle) without morphological correlate will be treated locally without actual local recurrence  
51 <sup>74</sup>Prostate-specific membrane antigen (PSMA) is a cell surface protein with high expression in majority of  
52 prostate cancer <sup>76</sup>. 68Ga-PSMA has been used since 2012 as PSMA-ligand in recurrent prostate cancer  
53 <sup>77–79</sup>. Especially at low PSA levels, the detection rate of 68Ga-PSMA-11-PET/CT is significantly higher in  
54 comparison to other imaging methods. In a retrospective analysis for patients with biochemical progression  
55 after RP, Afshar-Oromieh et al. found that 69% of the patients had at least one positive lesion indicating  
56 prostate cancer recurrence. The detection rates were 43% for PSA levels ≤0.2 ng/mL, 58% for PSA >0.2  
57 to ≤0.5 ng/mL and 72% for PSA >0.5 to ≤1.0 ng/mL. Tumor detection was clearly associated with PSA level  
58 and higher Gleason scores <sup>78</sup>. Bluemel et al. analyzed the impact of 68Ga-PSMA-11-PET/CT in patients  
59 with PSA failure and negative F-18-choline-PET/CT. Of 125 patients, 32 patients with negative F-18-  
60 choline-PET/CT received an additional 68Ga-PSMA-11-PET/CT, which detected sites of recurrence in  
43.8% <sup>80</sup>.

1  
2  
3 The most common site of postoperative local recurrence, accounting for 57%–62% of relapse cases, is the  
4 vesicourethral anastomosis (VUA), which comprises the membranous urethra, bladder neck, and  
5 surrounding soft tissue<sup>81</sup>. Other typical local relapse sites are the lateral surgical margins (seminal vesicle  
6 bed) or remnant deferens, accounting for 25%–27% of cases<sup>82</sup>, and the retrovesical region (topography of  
7 rectoprostatic/Denonvilliers fascia) in 8%–21% of cases<sup>81</sup>. At PSMA PET/CT, local recurrence appears  
8 more often as focal ill-defined hypo-attenuating soft tissue with moderate PSMA uptake but can also simply  
9 appear as focal unilateral radiotracer uptake within the fibrotic tissue. It is important to point out that in most  
10 cases, postoperative local recurrence relies only on the PET component of the hybrid imaging because of  
11 the known lack of soft-tissue contrast in the pelvic region at CT<sup>77</sup>.

## 12 13 14 15 **2.4 Investigational treatment**

### 16 17 18 **2.4.1 Hypofractionated stereotactic body radiotherapy to the site of recurrence**

19  
20 External beam radiation therapy is one of the standard treatments for organ-confined prostate cancer, with  
21 cure rates similar to those of RP. Hypofractionation uses a higher dose-per-fraction of radiation, which  
22 reduces the number of fractions and the total duration of treatment, allowing greater comfort for the patient  
23 and lower costs, in addition to providing a therapeutic advantage in terms of tumor control and toxicity, as  
24 the  $\alpha/\beta$  of prostate cancer is lower than that of adjacent healthy tissues<sup>83</sup>. In 2018, a group of experts from  
25 the American Societies of Radiation Oncology, Medical Oncology, and Urology (ASTRO/ASCO/AUA)  
26 concluded that there is sufficiently robust evidence to justify using moderate hypofractionation in prostate  
27 cancer as common clinical practice<sup>84</sup>. A recent Cochrane review indicated that moderate prostate cancer  
28 hypofractionation (with fractions up to 3.4 Gy) provides oncological outcomes in terms of overall survival  
29 (OS), disease-free survival (DFS), and metastasis-free survival (MFS) similar to conventional fractionation,  
30 without a significant increase in acute or late toxicity<sup>85</sup>.

31 In addition, technical advances in the field of radiotherapy in recent years, such as intensity-modulated  
32 radiotherapy (IMRT), image-guided radiotherapy (IGRT), and stereotactic radiotherapy (SBRT), have  
33 enabled the progressive implementation of extreme hypofractionation (defined by fractions of at least 6 Gy)  
34 in various scenarios of localized prostate cancer treatment. The use of SBRT in prostate cancer has  
35 provided sufficient evidence in terms of tumor control results, quality of life reported by the patient, and low  
36 toxicity<sup>25,86,87</sup> to back its implementation in daily clinical practice. Moreover, the prostate cancer working  
37 group of the German Society of Oncology (DEGRO) but also the NCCN endorses the use of SBRT in the  
38 treatment of localized low and intermediate-risk prostate cancer, recommending its use in clinical trials in  
39 patients with the localized high-risk disease<sup>88-48</sup>.

40 The recent publication of two randomized trials comparing the use of extreme hypofractionation versus  
41 conventional fractionation (HYPO-RT-PC<sup>25</sup>, PACE-B trial<sup>87</sup>) has been crucial in supporting its use, although  
42 only the Scandinavian study (HYPO-RT-PC) reported results of long-term tumor and toxicity control. In  
43 2020, a randomized systematic review and meta-analysis of phase III trials were published comparing  
44 SBRT with normofractionated and hypofractionated regimens. It concluded that the ultra-hypofractionated  
45 regimens obtained similar 5-year disease-free survival results, with late gastrointestinal and genitourinary  
46 toxicity of <15% and <21%, respectively, when compared to hypofractionated regimens and conventional  
47 radiotherapy<sup>47</sup>.

48 Use of moderate hypofractionation is becoming a standard even in the postoperative setting. Retrospective  
49 and prospective single arm studies support a safe toxicity profile and a promising biochemical control rates  
50 with hypofractionation (PMID: 29178983). The recently reported results of the phase III clinical trial NRG-  
51 GU003 comparing hypofractionated post-operative prostate bed radiotherapy (HYPORT) to the  
52 conventional post-prostatectomy radiotherapy for men with prostate cancer determined that treatment with  
53 HYPORT yielded no increase in patient-reported genitourinary (GU) or gastrointestinal (GI) toxicity for trial  
54 participants, with a similar biochemical disease control at the 2 year follow-up.

55 To demonstrate the viability and safety of the use of SBRT in this clinical scenario, Repka et al<sup>50</sup> conducted  
56 a theoretical feasibility study of SBRT after RP based on the NTCP (Normal Tissue Complication  
57 Probability) model, using patients who had previously been treated by conventional EBRT for biochemical  
58 recurrence after prostatectomy. Using the presimulation CT, RTOG recommendations were applied to  
59 define postprostatectomy volumes, and a dose of 30 Gy was prescribed to the PTV in five fractions,  
60 corresponding to an equivalent dose in 2 Gy fractions (EQD2) of 64.3 Gy, assuming an  $\alpha/\beta$  value of 1.5



1  
2  
3 Gy. The NTCP model was applied to estimate the risk of late rectal and/or bladder toxicity. According to  
4 the NTCP model, the mean of grade $\geq$ 2 late rectal toxicity was estimated at 0.28% and of late grade 2  
5 toxicity on the bladder neck at 0.00013%, while the calculated average for the exacerbation of late urinary  
6 symptoms was 4.81%. The conclusion by the authors, considering the limitations of the NTCP model, is  
7 that using SBRT after surgery seems feasible and may offer a safe, convenient treatment option for patients  
8 in both the adjuvant and salvage after biochemical failure.

9 A prospective phase I study by Sampath et al. tested the usage of stereotactic dose-escalated radiotherapy  
10 on prostate bed in and showed a crude rate of biochemical control of 42% in the overall population<sup>90</sup>.  
11 Patients were treated with dose fractionation schedules of 35, 40 and 45 Gy in five fractions. Authors  
12 underlined that dose escalation to 45 Gy was feasible without increasing the rate of adverse events, but no  
13 improvement in PSA control was reported if compared to 40 Gy in 5 fractions. Furthermore, a recent  
14 propensity score analysis comparing focal stereotactic SRT and conventional radiotherapy for macroscopic  
15 prostate bed recurrence showed comparable bRFS and PFS rates between the two modalities. On the  
16 other hands, a lower rate of toxicity was confirmed for patients undergoing focal stereotactic SRT compared  
17 to conventional fractionated SRT, with acute GI and GU adverse events reported in 4.4% versus 44.4%  
18 ( $p < 0.001$ ) and 28.9% versus 46.7% ( $p = 0.08$ ) of patients, and late GI and GU adverse events reported in  
19 0% versus 13.3% ( $p = 0.04$ ) and 6.7% versus 22.2% ( $p = 0.03$ ) of patients, respectively<sup>91</sup>. Considering the  
20 favorable therapeutic ratio of this approach and the lower number of fractions needed, the authors  
21 suggested stereotactic is an attractive alternative to conventional SRT in this setting  
22

## 23 2.5 Rationale for performing the trial

24  
25 Radical prostatectomy and radiotherapy (RT) are the considered as backbones for treating localized  
26 disease<sup>1</sup>. However radical prostatectomy, 30 – 60% of patients will develop recurrent disease<sup>2,3</sup>. Several  
27 large randomized controlled trials have shown a benefit of postoperative radiation therapy in patients with  
28 a high risk of local recurrence after RPE, e.g. pT3 disease or positive resection margins<sup>4–8</sup>. In the era of  
29 high sensitivity PSA and PSMA-PET/CT, there has been additional evidence suggesting a similar  
30 oncological outcome if patients are treated with early salvage radiotherapy in case of a rising PSA after  
31 RPE instead of immediate adjuvant radiotherapy<sup>9–12</sup>. However, the above mentioned studies as well as the  
32 studies including patients receiving salvage radiotherapy in case of a macroscopic tumor recurrence in the  
33 prostate bed were done with conventionally fractionated radiotherapy, usually in 2 Gy per fraction<sup>4–12</sup>.

34  
35 In the setting of definite radiotherapy to the prostate, ultrahypofractionated radiotherapy has been used as  
36 a treatment option in patients with low or intermediate risk for a long time and there are published data with  
37 a reasonable follow up that shows excellent biochemical control with low high grade toxicity rates<sup>13–20</sup>. In  
38 addition, data on ultrahypofractionated in high-risk patients are emerging with several large trials being  
39 published with encouraging results<sup>21–26</sup>. The rationale for using ultrahypofractionated in patients treated for  
40 prostate cancer is the estimated low  $\alpha/\beta$  value of around 1.5 Gy<sup>27,28</sup>. Therefore, using a larger fraction dose  
41 is expected to improve the therapeutic ratio and consequently the probability of tumor control.  
42

43  
44 Although Data on moderate hypofractionation in the setting of postoperative radiotherapy with a fraction  
45 dose of up to 3 Gy per fraction does not seem to support this concern, given the low toxicity rates that were  
46 reported in several analyses<sup>29–38</sup>. However, data on postoperative ultrahypofractionated radiotherapy to the  
47 prostate bed remains immature. The rates of acute and late toxicities following ultrahypofractionated  
48 radiotherapy to the prostate bed were reported in retrospective and phase I studies are within the above  
49 mentioned ranges. The rate of acute  $\geq$  G2 GI and GU toxicities range from 0 – 50 % and 0 – 33.3 % and  
50 for late  $\geq$  G2 GI and GU toxicities from 0 – 11.5 % and 0 – 38.5 %<sup>39–48</sup>. This data suggests that SBRT to  
51 the prostate bed can be applied with toxicity rates similar to that of normofractionated or mildly  
52 hypofractionated radiotherapy  
53

54  
55 Further improvement in the oncological outcomes can be expected through technological developments in  
56 radiotherapy delivery and precise targeting of the local relapses in the prostate bed. A SRT using a  
57 ultrahypofractionated schedule delivered precisely in 5 fractions and limited only to the site of isolated  
58 macroscopic recurrence in the prostate bed as defined by PSMA-PET and multiparametric MRI (mpMRI)  
59 may represent a valid treatment strategy to improve the therapeutic ratio in these patients (short overall  
60 treatment time, better sparing of surrounding healthy tissues, increased dose to the target volume).

#### Rationale for combining ADT to SRT

- The benefit of ADT to salvage radiation has been demonstrated in two randomized phase III trials, RTOG 9601 and GETUG 16, which provided evidence of improved metastasis-free and overall survival and durable biochemical disease control with bicalutamide for 24 mo and ADT using LHRH agonists for 6 months, respectively.
- These studies support the current National Comprehensive Cancer Network (NCCN) guidelines to consider combination of 6–24 months of hormonal therapy with SRT in this setting.

### 3 STUDY OBJECTIVES AND DESIGN

#### 3.1 Hypothesis and primary objective

We hypothesize that focal SRT in combination with short-term ADT may further prolong or prevent progression, and improve the success of SRT for relapsing patients with a macroscopic relapse after RP. Through better definition and optimization of the target volumes sparing adjacent normal tissue, an improvement in the toxicity profile can be expected.

The main objective of the trial is to explore the efficacy and safety of combining 6 months short-term ADT to focal hypofractionated SRT delivered in 5 fractions where mpMRI and PSMA-PET CT are used to precisely identify the local recurrence and compare it to the published literature.

### 3.2 Primary and secondary endpoints

Primary endpoints:

- Biochemical relapse free survival at 2 years

Secondary endpoints:

- Acute side effects (until 90 days after end of radiation) of grade 3 or higher based on CTCAE v5
- Progression-free survival
- Metastasis-free survival
- Late side effects
- Quality of life (based on EORTC QLQ-C30, QLQ-PR25)

### 3.3 Study design

This is a single arm, prospective phase II multicenter study.

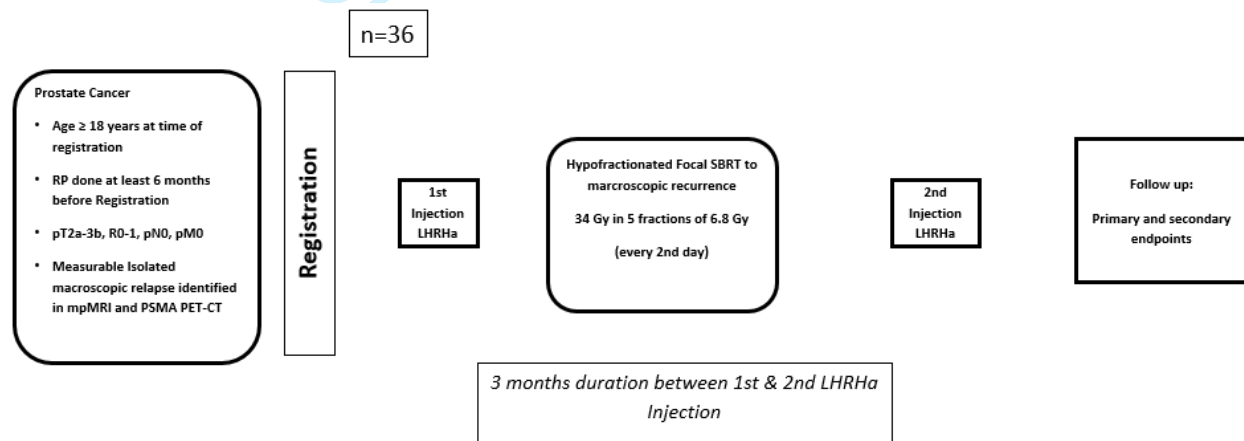

### 3.4. Study intervention

#### 3.4.1 Pre-registration imaging

Within 3 months prior to registration either, PSMA PET/CT is mandatory to exclude regional or distant metastasis. Both 18F- and 68G-PSMA tracers are allowed. A mpMRI of the prostate bed acquired within 3 months before registration is mandatory to define the extension of local recurrence.

#### 3.4.2 Radiation treatment (SBRT)

##### 3.4.2.1 Patient's positioning, immobilization, data acquisition and simulation:

A treatment planning CT scan, with the patient in the same position as during treatment, is required to define the clinical target volume (GTV), the planning target volume (PTV) and the critical structures. Patients will be positioned in supine position. Leg and knee support is highly recommended. Each patient will be positioned in an individualized immobilization device in the treatment position on a flat table. It is recommended that patients are scanned/simulated and treated with comfortably full bladder. An empty rectum is recommended for prostate bed radiotherapy. An example of a bladder and rectal protocol: An empty rectum is provided by using a rectal enema +/- 60 minutes before planning CT. After emptying rectum and bladder the patient is asked to drink the amount of 500-750 ml of water. The planning CT is then performed after ca. 40 minutes. The patient repeats the bladder filling procedure during the entire treatment courses. An endorectal balloon can be used for repositioning purposes as per local institutional standards.

Radiopaque fiducial markers (mandatory for robotic-based treatments) may be implanted in the prostate bed 1 week before the planning CT scan at the discretion of the treating center.

The position of the patient will be reproduced using skin marks and orthogonal laser beams during treatment preparation and execution. The treatment planning CT scan should include at least the pelvis from the lower part of the second lumbar vertebra (L2) to the lower part of the ischial tuberosities. The entire target volume and all organs at risk (OAR) must be included in CT scan. CT slice thickness should be  $\leq 2$  mm. The GTV, PTV and OAR must be outlined on all CT slices in which these structures are visible.

Morphological and topographical information given by clinical examination, mpMRI and PET/CT, must be integrated to delineate the target volumes. Rigid or deformable co-registration is allowed.

### 3.4.2.2 Volumes

#### 3.4.2.2.1 Definition of target volumes (refer to appendix 2 & 3):

- The Gross Tumor Volume of the suspicious local recurrence (GTV) is defined by the physician as all known gross disease *before any treatment* as defined by the CT/MRI images and PET scan using rigid or deformable fusion) and/or clinical information.
- The Planning Target Volumes (PTV) will provide margin around the GTV to compensate for variability in daily treatment set-up and internal motion due to breathing or motion during treatment. The PTV should encompass the GTV with a margin of 5 mm in all directions.

#### 3.4.2.2.2 Organs at Risk (OAR)

- *Delineation:*

The OAR should be delineated according to the RTOG guidelines. For more details please see RTOG/NRG Oncology web site to view the normal pelvis atlas for examples of normal tissue contours (<http://www.rtog.org/CoreLab/ContouringAtlases/MaleRTOGNormalPelvisAtlas.aspx>).

*Bladder:* this organ is defined by the external wall (5-mm thickness), delineated on each slide, from the dome to the bladder neck and the start of the VUA.

*VUA and distal urethra:* from the bladder neck to the distal urethra inside the penile bulb using the mpMRI sequences. A 2-mm isotropic margin is added around these structures to create a PRV volume.

*Rectum:* defined by the external wall from the recto-sigmoid junction to ischial tuberosities (5-mm thickness).

*Femoral heads:* delineated from the top of the hip joint to the small trochanter.

*Bowel bag:* from the most inferior small or large bowel loop to 1 cm at minimum above PTV for coplanar beam plans, or more if non-coplanar beams or tomotherapy plans are used.

- *Dose constraints to OAR:*

It is strongly recommended that dose constraints are not exceeded. If a dose constraint cannot be achieved due to overlap of the target with an OAR or PRV, the dose per fraction can be lowered or the target coverage compromised in order to meet the constraint.

| Organ at risk              | Dose constraint              | Aim                  |
|----------------------------|------------------------------|----------------------|
| Rectal wall                | V18.1 Gy<br>V29 Gy<br>V36 Gy | <50%<br><20%<br><1cc |
| Bladder wall               | V18.1 Gy<br>V37 Gy           | <40%<br><10cc        |
| PRV_VUA and distal urethra | V36 Gy                       | <1cc                 |

|               |                    |              |
|---------------|--------------------|--------------|
| Femoral heads | V14.5 Gy           | <5%          |
| Penile bulb   | V29.5 Gy           | <50%         |
| Bowel         | V18.1 Gy<br>V30 Gy | <5cc<br><1cc |

### 3.4.2.3 Treatment technique.

Intensity modulated radiotherapy (IMRT) or use of rotational techniques is mandatory. By definition only dosimetry obtained by inversed treatment planning is considered as IMRT. IMRT may be performed by using Step-and-Shoot-Technique, Sliding-Window-Technique or Volumetric Modulated Arc Therapy (VMAT), including MRI-guided radiation therapy systems (MRIdian® or Elekta Unity®). Treatment with Cyberknife® is allowed (implant of radiopaque fiducial markers 1 week before the planning CT scan is mandatory).

### 3.4.2.4 Dose computation.

- Any treatment planning system, capable of 3D-dose computation using a convolution algorithm, will be used. The PTV may be treated with any combination of coplanar or non-coplanar fields shaped to deliver the specified dose while minimizing dose to the normal tissue OAR. Field arrangements will be determined by 3D planning to produce the optimal conformal plan in accordance with volume definitions. The treatment plan used for each patient will be based on an analysis of the volumetric dose including DVH analyses of the PTV and critical OAR. Each field is to be treated daily.
- The PTVs should be outlined in all relevant planes. The dose distribution should be shown at least in the plane through the beam axes.
- Dose distribution is obtained in a 3-dimensional pattern with Dose Volume Histogram (DVH). DVH are to be used for assessing dose to the PTVs and all normal tissues at risk.

### 3.4.2.5. Equipment and tools.

- Both a linear accelerator, tomotherapy and Cyberknife is allowed.

### 3.4.2.6 Dose prescription.

A total dose of 34 Gy (80% of the maximal dose) will be delivered in 5 fractions and fractions every second day (NTD<sub>2Gy</sub> 80 Gy  $\alpha/\beta=1.5\text{Gy}$  for tumor control and 66.6 Gy  $\alpha/\beta=3\text{Gy}$  for late toxicity). Treatment will be prescribed to the periphery of the target (80% of the dose (=34Gy), should cover 90% of the PTV) covering the PTV. A maximal dose of 40 Gy is allowed to GTV. The priority will be given to the respect of dose constraints over PTV coverage.

### 3.4.2.7 Treatment Verification.

Daily patient set-up shall be performed using laser alignment to reference marks on the skin of the patient. Daily cone-beam CT set-up and on-line correction of patient's position is mandatory. If multiple targets will be irradiated with multiple isocenters, a CBCT prior to every treatment for every isocenter is mandatory. Patient immobilization devices can be used according to the institutional policy.

## 3.4.3 Androgen deprivation therapy

- All patients should receive an LHRH-agonist or antagonist for a duration of 6 months using 3 monthly formulations. In case of LHRH-agonist flare prevention with an anti-androgen is

recommended for at least 5 days prior to the first injection of the agonist and should not be continued for longer than 15 days of the 1st month duration.

- ADT should start no later than the 1<sup>st</sup> SBRT fraction and no earlier than 2 weeks before the start of radiotherapy.
- Palliative ADT should not be started for biochemical progression without documented clinical progression. In case of symptomatic progression, palliative ADT is mandatory. In case of clinical asymptomatic progression, delayed ADT until progression to a symptomatic state is allowed in well-informed men (EAU 2016 guidelines). In general, we would recommend to start ADT in asymptomatic patients only if conventional imaging would confirm clinical progression. So we would not recommend the start of ADT for PET-positive lesions not suspicious on conventional imaging (CT/MRI/bone scintigraphy).
- ADT-related toxicity should be managed according to Nguyen et al. Eur Urol. 2015 May;67(5):825-36.

## 4 STUDY POPULATION AND STUDY PROCEDURES

### 4.1 Inclusion and exclusion criteria, justification of study population

#### Inclusion criteria:

1. Written informed consent according to ICH/GCP regulations before registration and prior to any trial specific procedures
2. Age  $\geq$  18 years at time of registration
3. WHO performance status 0-1
4. Lymph node negative adenocarcinoma of the prostate treated with radical prostatectomy (RP) at least 6 months before trial registration. Tumor stage pT2a-3b, R0-1, pN0 or cN0 according to the UICC TNM 2009.
5. Evidence of measurable local recurrence at the prostate bed detected by PSMA PET/CT and mpMRI within the last 3 months. In case of unclear local recurrence, a biopsy confirmation is recommended.
6. Patient must have non-metastatic (N0, M0) disease, as defined by a lack of nodal or distant metastases seen on PSMA PET/CT scan
7. Patients must have non-castrate levels of serum testosterone ( $\geq$ 50 ng/dL).
8. Patients must not have previously received hormonal therapy (LHRH agonists, antiandrogen, or both, or bilateral orchiectomy).
9. Absence of any psychological, familial, sociological or geographical condition potentially hampering compliance with the study protocol and follow-up schedule; those conditions should be discussed with the patient before registration in the trial

#### Exclusion criteria:

1. Persistent PSA ( $>$  0.4 ng/mL) 4 to 20 weeks after RP
2. Previous hematologic or primary solid malignancy within 3 years prior registration with the exception of curatively treated localized non-melanoma skin cancer
3. Usage of products known to affect PSA levels within 4 weeks prior to start of trial treatment phase including any form of androgen suppression agents and androgen deprivation therapy
4. Bilateral hip prosthesis
5. Severe or active co-morbidity likely to impact on the advisability of salvage RT
6. Treatment with any experimental drug or participation within a clinical trial within 30 days prior to registration (exception: concurrent participation in the biobank studies is allowed)

### 4.2 Recruitment and screening:

Patient registration will only be accepted from authorized investigators.



Prior to registration, the following steps have to be taken:

- Fill in the patient screening (used for monitoring potentially eligible patients, and will be destroyed after the end of the accrual period. Screening list is not a part of the CRFs), enrollment and identification lists.
- Check the eligibility criteria
- Obtain signed and dated written informed consent from the patient prior to any protocol-specific procedure according to ICH/GCP and local guidelines.
- Patients must complete the pre-treatment of quality of life assessment per protocol

Only electronic case report forms (eCRF) will be used. The use of worksheets is allowed if the copies of the templates are documented in the trial master file (TMF). The used worksheets must be kept with the patient charts.

Registration is done via Internet 'https://secutrial.insel.ch'. SecuTrial (interActive Systems) will be used as database. In case of problems investigators can phone the study coordinator from Monday through Friday. For technical difficulties, investigators are recommended to contact data management of CTU Bern

E-mail: datamanagement@ctu.unibe.ch

In order to receive authorization for online registration/data entry, sites must send a copy of the completed staff list to the Sponsor. Login details for the online database will be sent to authorized persons.

### 4.3 Study procedures

**Schedule of assessments (Table 1)**

| Required investigation        | Inclusion                          |                                   | Treatment | 1 Months after RT | 3 Months after RT | 6 Months after RT | Every 6 Months till end of 2 <sup>nd</sup> year after RT then once per year till 60 months |
|-------------------------------|------------------------------------|-----------------------------------|-----------|-------------------|-------------------|-------------------|--------------------------------------------------------------------------------------------|
|                               | Within 12 weeks prior registration | Within 2 weeks prior registration |           |                   |                   |                   |                                                                                            |
| Eligibility Check             | x                                  |                                   |           |                   |                   |                   |                                                                                            |
| Signed informed consent       | x                                  |                                   |           |                   |                   |                   |                                                                                            |
| Record prior history          | x                                  |                                   |           |                   |                   |                   |                                                                                            |
| Visits                        |                                    |                                   |           |                   |                   |                   |                                                                                            |
| Physical Examination          |                                    | x                                 |           | x                 | x                 | x                 | x                                                                                          |
| Biochemistry (Blood Samples)* |                                    |                                   |           |                   |                   |                   |                                                                                            |
| PSA                           |                                    | x                                 |           | x                 | x                 | x                 | x                                                                                          |
| Testosterone                  |                                    | x                                 |           | x                 | x                 | x                 | x                                                                                          |
| Radiology                     |                                    |                                   |           |                   |                   |                   |                                                                                            |
| PSMA PET                      | x                                  |                                   |           |                   |                   |                   |                                                                                            |
| MRI                           | x                                  |                                   |           |                   |                   |                   |                                                                                            |
| Radiotherapy                  |                                    |                                   |           |                   |                   |                   |                                                                                            |
| Treatment planning            |                                    |                                   | x         |                   |                   |                   |                                                                                            |
| Record Planning results       |                                    |                                   | x         |                   |                   |                   |                                                                                            |
| Adverse Events                |                                    |                                   |           |                   |                   |                   |                                                                                            |
| Baseline toxicity             |                                    | x                                 |           |                   |                   |                   |                                                                                            |
| Acute toxicity                |                                    |                                   | x         | x                 | x                 |                   |                                                                                            |
| Late toxicity                 |                                    |                                   |           |                   |                   | x                 | x                                                                                          |
| EORTC QoL questionnaire       |                                    |                                   |           |                   |                   |                   |                                                                                            |
| QLQ-C30                       |                                    | x                                 |           | x                 | x                 | x                 | x                                                                                          |
| QLQ-PR25                      |                                    | x                                 |           | x                 | x                 | x                 | x                                                                                          |



### \* Blood samples

The obtained blood samples are used only for PSA and testosterone values. The measurement for this labs is conducted within the local hospital laboratory of each participating centre and the rest samples will be disposed afterwards. No blood will be collected or stored or used for other research purposes within the frame of this trial.

#### 4.4 Withdrawal and discontinuation

Patients have the right to discontinue their participation in the trial for any reason and at any time, without prejudice to further treatment. Patients who refuse further trial treatment will be transferred to follow-up phase and continue to receive the follow-up assessments as scheduled. Patients who withdraw their consent (i.e. refuse further data collection), will be informed that all data and samples collected until the time point of their withdrawal will be kept coded and used. For the patient's security, a last examination should be performed.

Patients may be withdrawn at any time from trial treatment at the discretion of the treating physician or the investigator due to a SAE, or based on any other relevant medical condition. The patient then will be transferred to the follow-up phase and continue to receive the follow-up assessments as scheduled.

## 5 STATISTICS AND METHODOLOGY

### 5.1. Statistical analysis plan and sample size calculation

According to the published prospective trials and retrospective series reporting the outcome of the normofractionated SRT, we define biochemical relapse free survival at 2 years of 60% as poor and of 80% as promising outcome that would justify further investigation. We will therefore test the null hypothesis that the biochemical relapse free survival at 2 years is lower than 60% against the alternative that it is at least 80%. Based on a one-sample binomial exact test with a one-sided alpha of 5%, 36 patients are required to reach a power of 80%, not taking into account patients lost to follow-up. The null hypothesis will be rejected if at least 27 patients show biochemical relapse free survival at 2 years.

We will control the safety of the intervention during the trial by assessing acute side effects (grade 3 or higher) at 90 days after 12 and 24 patients. The trial will be stopped if there is evidence that the proportion of patients with acute side effects (grade 3 or higher) is larger than 27%, the proportion observed that will be tested using one-sample binomial exact tests with a one-sided alpha of 5%.



Time-to-event outcomes will be analyzed using Kaplan-Meier-curves, the proportion of responders at 1 and 2 years, and the restricted mean survival time at 1 and 2 years with 95% confidence interval. Binary outcomes will be reported using absolute and relative frequencies with 95% confidence intervals.

The probability of biochemical relapse free survival and metastasis-free survival will be estimated using the Kaplan-Meier method. Cox proportional hazards models will be fit to assess the effects of treatment and baseline clinical and pathologic features (such as PSA, PSA doubling time, Gleason score etc) on biochemical relapse free survival and metastasis free survival

## 5.2. Definition of endpoints

### 5.2.1 Biochemical relapse free survival (primary endpoint)

The initial PSA at time of registration will be the starting point. Freedom from biochemical progression is counted from the day of registration to the day of either first recorded biochemical progression as defined below, clinical progression or death due to clinical progression. Patients not experiencing a biochemical or clinical failure or death due to clinical progression are censored at time of last assessment.

A biochemical recurrence is defined by any confirmed PSA rise above 0.20 ng/mL with a confirmatory rise at least 2 weeks later. For those patients whose PSA does not drop below 0.20 ng/mL at time of first response assessment at 3 months are considered as non-responders to treatment and are considered to have a biochemical recurrence in case a second measurement at least 2 weeks later confirms a rising PSA above this level.

### 5.2.2 Metastasis-free survival:

Metastasis-free survival is defined as time between registration and the appearance of a metastatic recurrence (any M1) as suggested by PET-CT or death due to any cause. Patients without any of the events of interest (including those with biochemical relapse only) are censored at the date of the last follow-up. Second cancers are not considered events in terms of this endpoint. In case of biochemical progression, re-staging will be made with PET-CT imaging preferably with the same tracer used before registration. In case of negative PET findings at biochemical relapse, a new PET imaging should be repeated on a 6-monthly basis or earlier in case clinically indicated.

### 5.2.3 Clinical progression-free survival:

Clinical progression-free survival is defined as time between registration and the appearance of a new recurrence (any N1 or M1) as suggested by PET-CT, symptoms related to progressive PC, or death due to any cause.

- A local recurrence is defined as the appearance of evidence of a recurrence within the prostate bed. Confirmation of the recurrence by biopsy is recommended, whenever possible.
- A regional nodal recurrence is defined as a radiographic (PET-CT) evidence of a lymphadenopathy in the pelvis in a patient without the diagnosis of hematologic/lymphatic disorder associated with lymphadenopathy or if there is histopathological evidence. Histologic confirmation is not required although recommended, especially in the absence of biochemical recurrence.
- Distant recurrence is defined as the appearance of distant metastases (M1a, M1b, M1c) outside the pelvis evidenced by PET-CT. Patients without any of the events of interest (including those with biochemical relapse only) are censored at the date of the last follow-up.
- Second cancers are not considered events in terms of this endpoint. Detailed analysis per subsite of recurrence (local, regional and distant) with time-to-event analysis will be performed. In case of biochemical progression, re-staging will be made with PET-CT imaging preferably with the same tracer used before registration. In case of negative PET findings at biochemical relapse, repeat PET imaging should be repeated on a 6-monthly basis or earlier in case clinically indicated.

### 5.2.4 Acute and late toxicity:

Radiotherapy toxicity will be assessed according to NCI CTCAE v5.0. Special attention shall be given to diarrhea, fecal incontinence, proctitis, rectal hemorrhage, rectal pain, hematuria, urinary frequency, urinary urgency, urinary retention, urinary incontinence, cystitis non-infective and erectile dysfunction. Acute toxicity is defined as occurring during treatment and up to 3 months after completion of treatment. Late toxicity is defined as occurring later than 3 months after end of treatment.

### 5.2.5 Quality of life:

All patients registered into this trial are to complete QoL questionnaires at the defined timepoints (see table 1). A longitudinal design is used. Patients are asked to complete a QoL questionnaire. The EORTC QoL questionnaire (QLQ) C-30 Core questionnaire (version 3) and the prostate cancer module EORTC QLQ PR25 will be used. The QoL questionnaire including all these instruments will be provided for the major languages spoken in the participating centers.

## **5.3. Handling of missing data and drop-outs**

We expect that all registered patients have complete baseline data. All patients that have at least one outcome assessment can be considered in repeated-measures analyses. Models will implicitly correct for missing data based on the missing at random mechanism. If there are patients with no outcome data at all, we will perform multiple imputations. For the time-to-event analysis, patient drop-outs will be accounted for by censoring.

## **6 Regulatory Aspects and Safety**

### **6.1 Local regulations / Declaration of Helsinki**

The study will be carried out in accordance to the protocol and with principles enunciated in the current version of the Declaration of Helsinki, the guidelines of Good Clinical Practice (GCP) issued by ICH, the Swiss Law and Swiss regulatory authority's requirements. The CEC and regulatory authorities will receive annual safety and interim reports and be informed about study stop/end in agreement with local requirements.

## 6.2 (Serious) Adverse Events and notification of safety and protective measures

An Adverse Event (AE) is any untoward medical occurrence in a patient or a clinical investigation subject which does not necessarily have a causal relationship with the trial procedure. An AE can therefore be any unfavourable or unintended finding, symptom, or disease temporally associated with a trial procedure, whether or not related to it.

A Serious Adverse Event (SAE) (ClinO, Art. 63) is any untoward medical occurrence that

- Results in death or is life-threatening,
- Requires in-patient hospitalisation or prolongation of existing hospitalisation,
- Results in persistent or significant disability or incapacity, or
- Causes a congenital anomaly or birth defect

Both Investigator and Sponsor-Investigator make a causality assessment of the event to the trial intervention, (see table below based on the terms given in ICH E2A guidelines). Any event assessed as possibly, probably or definitely related is classified as related to the trial intervention.

| Relationship                                                                            | Description                                                                                                               |
|-----------------------------------------------------------------------------------------|---------------------------------------------------------------------------------------------------------------------------|
| Definitely                                                                              | Temporal relationship<br>Improvement after dechallenge*<br>Recurrence after rechallenge<br>(or other proof of drug cause) |
| Probably                                                                                | Temporal relationship<br>Improvement after dechallenge<br>No other cause evident                                          |
| Possibly                                                                                | Temporal relationship<br>Other cause possible                                                                             |
| Unlikely                                                                                | Any assessable reaction that does not fulfil the above conditions                                                         |
| Not related                                                                             | Causal relationship can be ruled out                                                                                      |
| *Improvement after dechallenge only taken into consideration, if applicable to reaction |                                                                                                                           |

Both Investigator and Sponsor-Investigator make a severity assessment of the event as mild, moderate or severe. Mild means the complication is tolerable, moderate means it interferes with daily activities and severe means it renders daily activities impossible.

### Reporting of SAEs (see ClinO, Art. 63)

1  
2  
3 All SAEs are documented and reported immediately (within a maximum of 24 hours) to the Sponsor-  
4 Investigator of the study.

5 If it cannot be excluded that the SAE occurring in Switzerland is attributable to the intervention under  
6 investigation, the Investigator reports it to the Ethics Committee via BASEC within 15 days.

7 If the SAE occurs at one of the study sites, the coordinating Investigator reports the events to the Ethics  
8 Committee concerned, within 15 days.  
9

### 10 11 **Follow up of (Serious) Adverse Events**

12  
13 All subjects with SAE must be followed up for outcome. The Ethics Committee must be informed according  
14 regulations.  
15

### 16 17 **Notification of safety and protective measures** (see ClinO, Art 62, b)

18  
19 If immediate safety and protective measures have to be taken during the conduct of the study, the  
20 investigator notifies the Ethics committee of these measures, and of the circumstances necessitating them,  
21 within 7 days.  
22

### 23 24 **6.3 (Periodic) safety reporting**

25  
26 An annual safety report (ASR/DSUR) is submitted once a year to the local Ethics Committee by the  
27 Investigator (ClinO, Art. 43 Abs).  
28

### 29 30 **6.4 Radiation**

31 If the permitted dose guidance value (5 mSv per year if no direct benefit is expected for the participants) is  
32 exceeded at any time, the local Investigator notifies the Ethics Committee via BASEC within 7 working days  
33 of it becoming known (see ClinO, Art. 44).  
34

### 35 36 **6.5 Pregnancy**

37  
38 Since this cohort only consists of male patients, pregnancy of the participant is not possible. However,  
39 patients are counselled regarding strict birth control for at least 6 months after treatment for themselves  
40 and their partners.  
41

### 42 43 **6.6 Amendments**

44  
45 Substantial changes to the study setup and study organization, the protocol and relevant study documents  
46 are submitted to the Ethics Committee for approval before implementation. Under emergency  
47 circumstances, deviations from the protocol to protect the rights, safety and well-being of human subjects  
48 may proceed without prior approval of the Ethics Committee. Such deviations shall be documented and  
49 reported to the Ethics Committee as soon as possible.  
50

51  
52 Substantial amendments are changes that affect the safety, health, rights and obligations of participants,  
53 changes in the protocol that affect study objective(s) or central research topic, changes of study site(s) or  
54 of study leader and sponsor (ClinO, Art. 29).  
55

56  
57 A list of all non-substantial amendments will be submitted once a year to the competent EC together with  
58 the ASR.  
59  
60

## 6.7 (Premature) termination of study

The sponsor-investigator has the right to close this study (or, if applicable, individual segments thereof, e.g., recruitment) at any time, which may be due but not limited to the following reasons:

- If risk-benefit ratio becomes unacceptable owing to, for example,
- Safety findings from this study, e.g., SAEs,
- Results of parallel clinical studies,
- Results of parallel animal studies (e.g., toxicity, teratogenicity, carcinogenicity, or reproduction toxicity),
- If the study conduct, e.g., recruitment rate, drop-out rate, data quality, protocol compliance, does not suggest a proper completion of the trial within a reasonable time frame.

The Investigator has the right to close his centre at any time. For any of the above closures, the following applies:

- Closures should occur only after consultation between involved parties,
- All affected institutions, e.g., IEC(s) or IRB(s), competent authority, study centre, head of study centre must be informed as applicable according to local law,
- The Investigator will retain all study materials unless notification will be given by the sponsor for destruction,
- In case of a partial study closure, ongoing patients, including those in post study follow-up, must be cared for in an ethical manner.

Upon regular study termination, the Ethics Committee is notified via BASEC within 90 days (ClinO, Art. 38).

Upon premature study termination or study interruption, the Ethics Committee is notified via BASEC within 15 days (ClinO, Art. 38).

A final report is submitted to the Ethics Committee via BASEC within a year after completion or discontinuation of the study, unless a longer period is specified in the protocol (ClinO, Art. 38)

Essential documents will be archived safely and securely in such a way that ensures that they are readily available upon authorities' request. Patient (hospital) files will be archived according to local regulations and in accordance with the maximum period of time permitted by the hospital.

After termination of the study, all study files must be archived according to the Ordinance on Clinical Trials in Human Research (ClinO), Art. 45:

<sup>1</sup> The sponsor must retain all data relating to the clinical trial ... at least for ten years after the completion or discontinuation of the clinical trial.

<sup>2</sup> The investigator must retain all documents required for the identification and follow-up of participants, and all other original data, for at least ten years after the completion or discontinuation of the clinical trial.

## 6.8 Insurance

Insurance will be provided by the University Hospital of Bern, Inselspital. A copy of the certificate is filed in each investigator site file and the trial master file.

## 7 FURTHER ASPECTS

### 7.1 Overall ethical considerations



### 7.1.1 Patient protection

The responsible investigator will ensure that this study is conducted in agreement with either the Declaration of Helsinki (Tokyo, Venice, Hong Kong, Somerset West and Edinburgh amendments) or the laws and regulations of the country, whichever provides the greatest protection of the patient.

The protocol has been written, and the study will be conducted according to the ICH Harmonized Tripartite Guideline for Good Clinical Practice (<http://www.ich.org/products/guidelines/efficacy/efficacy-single/article/good-clinical-practice.html>).

The protocol will be approved by the Local, Regional or National Ethics Committees.

### 7.1.2 Subject identification

Trial-related data of the patient will be provided in a coded manner to the Sponsor. The names of the patients will not be disclosed to the University Hospital Bern, Switzerland. A sequential UPN will be attributed to each patient registered into the trial. Identification of patients must be guaranteed at the center. In order to avoid identification errors the UPN have to be provided on the CRF. Use the patient screening, enrollment and identification list. Patient confidentiality will be maintained according to applicable legislation. Patients must be informed of, and agree to, data transfer and handling, in accordance with local regulations.

### 7.1.3 Informed consent

All patients will be informed of the aims of the study, the possible adverse events, the procedures and possible hazards to which he/she will be exposed, and the mechanism of treatment allocation. They will be informed as to the strict confidentiality of their patient data, but that their medical records may be reviewed for trial purposes by authorized individuals other than their treating physician.

It is the responsibility of the individual investigator to translate the enclosed informed consent document. The translated version should be dated and version controlled.

It will be emphasized that the participation is voluntary and that the patient is allowed to refuse further participation in the protocol whenever he/she wants. This will not prejudice the patient's subsequent care. Documented informed consent must be obtained for all patients included in the study before they are registered. This must be done in accordance with the national and local regulatory requirements.

## 7.2 Risk-benefit assessment

This trial investigates the use of ultrahypofractionated SRT for patients with biochemical progression after prostatectomy who developed isolated local recurrence with no evidence of metastasis. For this group of patients, conventional SRT is the standard of care. Previous studies have shown that ultrahypofractionated RT is safe and can be considered as standard of care in treatment of primary prostate cancer. The use of ultrahypofractionated SRT was reported in various retrospective series and phase I trials.

Patients presenting disease progression with radiological evidence of disease either loco-regionally and/or systemically (bone and/or lymph nodes) could undergo biopsy depending on clinical judgment, i.e. if the risks of the biopsy procedure are clinically acceptable. This will be discussed with patients at an individual basis.

## 8 QUALITY CONTROL AND DATA PROTECTION

### 8.1 Quality measures

For quality assurance the sponsor, the Ethics Committee or an independent trial monitor may visit the research sites. Direct access to the source data and all study related files is granted on such occasions. All involved parties keep the participant data strictly confidential.



## 8.2 Data recording and source data

The investigators will maintain appropriate medical and research records for this trial, in compliance with ICH-GCP (E6) and regulatory and institutional requirements for the protection of confidentiality of subjects. SecuTrial (interActive Systems) will be used as database. The principal investigator, sub-investigator, and clinical research nurses or coordinators will have access to the records.

The principal investigators will permit authorized representatives of the Sponsor and regulatory agencies to examine (and when required by applicable law, to copy) clinical records for the purposes of quality assurance reviews, audits, and evaluation of the study safety and progress.

### 8.2.1 Case Report Forms

The CRFs will be electronic (eCRF). All data requested on the CRFs must be recorded and the recorded data should be consistent with the source documents or the discrepancies should be explained. The Investigator should ensure the accuracy, completeness, and timeliness of the data reported in the CRF and all other required reports. Generally, the CRFs should be completed within one week of completion of a patient visit.

### 8.2.2 Specification of source documents

Source documents must be available at the site to document the existence of the study participants and must include the original documents relating to the study, as well as the medical treatment and medical history of the participant. Where source documents for specific entries in the CRF are not available, this must be explicitly documented in a note to file. Any data recorded directly in the CRF will be considered as source data. Any change or correction to source data should be dated, initialed, and explained (if necessary) and should not obscure the original entry. The use of worksheets is allowed if the copies of the templates are documented in the trial master file (TMF). The used worksheets must be kept with the patient charts.

For all data captured in the CRF, the location of the source should be documented on a list of source documents, which will be stored in the investigator site file at each study site. Only the local investigator, the responsible study nurse team, the study monitor and the authorities can access this document.

### 8.2.3 Record keeping / archiving

Essential documents (written and electronic), including images and radiotherapy plans must be retained for a period of at least 10 years from the completion or premature termination of the trial. The investigators should take measures to prevent accidental or premature destruction of these documents.

## 8.3 Confidentiality and coding

Trial and participant data will be handled with utmost discretion and is only accessible to authorised personnel who require the data to fulfil their duties within the scope of the study. On the CRFs and other study specific documents, participants are only identified by a unique participant number.

The investigator ensures anonymity of the patients; patients will not be identified by names in any documents. Signed informed consent forms and patient enrollment log will be kept strictly confidential to enable patient identification at the site.

## 8.4 Retention and destruction of study data

1  
2  
3 All study data are archived for 10 years after study termination or premature termination of the  
4 study.  
5

## 6 7 **9 MONITORING AND REGISTRATION**

8  
9 For quality control of the study conduct and data retrieval, all study sites will be visited on-site by  
10 appropriately trained and qualified monitors. Any findings and comments will be documented in site visit  
11 reports and communicated to the local PI and to the sponsor as applicable. Investigators at the participating  
12 study sites will support the monitor in his/her activities. Prior to study start (first participant enrolled) a plan  
13 detailing all monitoring-related procedures will be developed.  
14

15 All source data and relevant documents will be accessible to monitors and questions of monitors are  
16 answered during site visits.  
17

## 18 **10. FUNDING / PUBLICATION / DECLARATION OF INTEREST**

19  
20  
21 Debiopharm AG and Berger-Janser Stiftung support financially this clinical trial.

22 The results will be published in the name of the Hypo-FOCAL-SRT trial in a peer reviewed international  
23 journal on behalf of all collaborators. All presentations and publications, including abstracts, relating to the  
24 trial must be authorized by the Hypo-FOCAL-SRT trial steering committee (all co-investigators listed in the  
25 protocol). Participating centers should ask for the approval of the trial steering committee to use any data  
26 related to the patients registered in the trial.  
27

28 The investigators declare that they have no conflict of interest.  
29  
30  
31  
32  
33  
34  
35  
36  
37  
38  
39  
40  
41  
42  
43  
44  
45  
46  
47  
48  
49  
50  
51  
52  
53  
54  
55  
56  
57  
58  
59  
60

## 34 **11 REFERENCES**

1. Hamdy FC, Donovan JL, Lane JA, et al. 10-Year Outcomes after Monitoring, Surgery, or Radiotherapy for Localized Prostate Cancer. *N Engl J Med*. 2016;375(15):1415-1424. doi:10.1056/NEJMoa1606220
2. Han M, Partin AW, Zahurak M, Piantadosi S, Epstein JI, Walsh PC. Biochemical (prostate specific antigen) recurrence probability following radical prostatectomy for clinically localized prostate cancer. *J Urol*. 2003;169(2):517-523. doi:10.1097/01.ju.0000045749.90353.c7
3. Gandaglia G, Briganti A, Clarke N, et al. Adjuvant and Salvage Radiotherapy after Radical Prostatectomy in Prostate Cancer Patients. *Eur Urol*. 2017;72(5):689-709. doi:10.1016/j.eururo.2017.01.039
4. Bolla M, Poppel H Van, Collette L, et al. Postoperative radiotherapy after radical prostatectomy: a randomised controlled trial (EORTC trial 22911). 2005;366:572-578.

- 1  
2  
3 5. Bolla M, van Poppel H, Tombal B, et al. Postoperative radiotherapy after radical  
4 prostatectomy for high-risk prostate cancer: long-term results of a randomised  
5 controlled trial (EORTC trial 22911). *Lancet (London, England)*.  
6  
7 2012;380(9858):2018-2027. doi:10.1016/S0140-6736(12)61253-7  
8
- 9  
10 6. Thompson IMJ, Tangen CM, Paradelo J, et al. Adjuvant radiotherapy for  
11 pathologically advanced prostate cancer: a randomized clinical trial. *JAMA*.  
12 2006;296(19):2329-2335. doi:10.1001/jama.296.19.2329  
13
- 14  
15 7. Thompson IM, Tangen CM, Paradelo J, et al. Adjuvant Radiotherapy for  
16 Pathological T3N0M0 Prostate Cancer Significantly Reduces Risk of Metastases  
17 and Improves Survival: Long-Term Followup of a Randomized Clinical Trial. *J*  
18 *Urol*. 2009;181(3):956-962. doi:10.1016/j.juro.2008.11.032  
19
- 20  
21 8. Wiegel T, Bottke D, Steiner U, et al. Phase III postoperative adjuvant radiotherapy  
22 after radical prostatectomy compared with radical prostatectomy alone in pT3  
23 prostate cancer with postoperative undetectable prostate-specific antigen: ARO  
24 96-02/AUO AP 09/95. *J Clin Oncol Off J Am Soc Clin Oncol*. 2009;27(18):2924-  
25 2930. doi:10.1200/JCO.2008.18.9563  
26
- 27  
28 9. Kneebone A, Fraser-Browne C, Duchesne GM, et al. Adjuvant radiotherapy  
29 versus early salvage radiotherapy following radical prostatectomy (TROG  
30 08.03/ANZUP RAVES): a randomised, controlled, phase 3, non-inferiority trial.  
31 *Lancet Oncol*. 2020;21(10):1331-1340. doi:10.1016/S1470-2045(20)30456-3  
32
- 33  
34 10. Parker CC, Clarke NW, Cook AD, et al. Timing of radiotherapy after radical  
35 prostatectomy (RADICALS-RT): a randomised, controlled phase 3 trial. *Lancet*  
36 *(London, England)*. 2020;396(10260):1413-1421. doi:10.1016/S0140-  
37 6736(20)31553-1  
38
- 39  
40 11. Sargos P, Chabaud S, Latorzeff I, et al. Adjuvant radiotherapy versus early  
41 salvage radiotherapy plus short-term androgen deprivation therapy in men with  
42 localised prostate cancer after radical prostatectomy (GETUG-AFU 17): a  
43 randomised, phase 3 trial. *Lancet Oncol*. 2020;21(10):1341-1352.  
44 doi:10.1016/S1470-2045(20)30454-X  
45
- 46  
47 12. Vale CL, Fisher D, Kneebone A, et al. Adjuvant or early salvage radiotherapy for  
48 the treatment of localised and locally advanced prostate cancer: a prospectively  
49 planned systematic review and meta-analysis of aggregate data. *Lancet (London,*  
50 *England)*. 2020;396(10260):1422-1431. doi:10.1016/S0140-6736(20)31952-8  
51
- 52  
53 13. Boike TP, Lotan Y, Cho LC, et al. Phase I dose-escalation study of stereotactic  
54  
55  
56  
57  
58  
59  
60

- body radiation therapy for low- and intermediate-risk prostate cancer. *J Clin Oncol Off J Am Soc Clin Oncol*. 2011;29(15):2020-2026.  
doi:10.1200/JCO.2010.31.4377
14. Brand DH, Tree AC, Ostler P, et al. Intensity-modulated fractionated radiotherapy versus stereotactic body radiotherapy for prostate cancer (PACE-B): acute toxicity findings from an international, randomised, open-label, phase 3, non-inferiority trial. *Lancet Oncol*. 2019;20(11):1531-1543. doi:10.1016/S1470-2045(19)30569-8
  15. Chen LN, Suy S, Uhm S, et al. Stereotactic body radiation therapy (SBRT) for clinically localized prostate cancer: the Georgetown University experience. *Radiat Oncol*. 2013;8:58. doi:10.1186/1748-717X-8-58
  16. Jackson WC, Silva J, Hartman HE, et al. Stereotactic Body Radiation Therapy for Localized Prostate Cancer : A Systematic Review and Meta-Analysis of Over 6 , 000 Patients Treated On Prospective Studies. *Radiat Oncol Biol*. 2019;104(4):778-789. doi:10.1016/j.ijrobp.2019.03.051
  17. King CR, Brooks JD, Gill H, Presti JCJ. Long-term outcomes from a prospective trial of stereotactic body radiotherapy for low-risk prostate cancer. *Int J Radiat Oncol Biol Phys*. 2012;82(2):877-882. doi:10.1016/j.ijrobp.2010.11.054
  18. Kotecha R, Djemil T, Tendulkar RD, et al. Dose-Escalated Stereotactic Body Radiation Therapy for Patients With Intermediate- and High-Risk Prostate Cancer: Initial Dosimetry Analysis and Patient Outcomes. *Int J Radiat Oncol Biol Phys*. 2016;95(3):960-964. doi:10.1016/j.ijrobp.2016.02.009
  19. Meier RM, Bloch DA, Cotrutz C, et al. Multicenter Trial of Stereotactic Body Radiation Therapy for Low- and Intermediate-Risk Prostate Cancer: Survival and Toxicity Endpoints. *Int J Radiat Oncol Biol Phys*. 2018;102(2):296-303. doi:10.1016/j.ijrobp.2018.05.040
  20. Zilli T, Franzese C, Bottero M, et al. Single fraction urethra-sparing prostate cancer SBRT: Phase I results of the ONE SHOT trial. *Radiother Oncol J Eur Soc Ther Radiol Oncol*. 2019;139:83-86. doi:10.1016/j.radonc.2019.07.018
  21. Bauman G, Ferguson M, Lock M, et al. A Phase 1/2 Trial of Brief Androgen Suppression and Stereotactic Radiation Therapy (FASTR) for High-Risk Prostate Cancer. *Int J Radiat Oncol Biol Phys*. 2015;92(4):856-862. doi:10.1016/j.ijrobp.2015.02.046
  22. Callan L, Bauman G, Chen J, et al. A Phase I/II Trial of Fairly Brief Androgen Suppression and Stereotactic Radiation Therapy for High-Risk Prostate Cancer

- (FASTR-2): Preliminary Results and Toxicity Analysis. *Adv Radiat Oncol*. 2019;4(4):668-673. doi:10.1016/j.adro.2019.07.007
23. Foerster R, Zwahlen DR, Buchali A, et al. Stereotactic Body Radiotherapy for High-Risk Prostate Cancer: A Systematic Review. *Cancers (Basel)*. 2021;13(4). doi:10.3390/cancers13040759
24. Murthy V, Gupta M, Mulye G, et al. Early Results of Extreme Hypofractionation Using Stereotactic Body Radiation Therapy for High-risk, Very High-risk and Node-positive Prostate Cancer. *Clin Oncol (R Coll Radiol)*. 2018;30(7):442-447. doi:10.1016/j.clon.2018.03.004
25. Widmark A, Gunnlaugsson A, Beckman L, et al. Ultra-hypofractionated versus conventionally fractionated radiotherapy for prostate cancer: 5-year outcomes of the HYPO-RT-PC randomised, non-inferiority, phase 3 trial. *Lancet (London, England)*. 2019;394(10196):385-395. doi:10.1016/S0140-6736(19)31131-6
26. Zilli T, Jorcano S, Bral S, et al. Once-a-week or every-other-day urethra-sparing prostate cancer stereotactic body radiotherapy, a randomized phase II trial: 18 months follow-up results. *Cancer Med*. 2020;9(9):3097-3106. doi:10.1002/cam4.2966
27. Brenner DJ, Martinez AA, Edmundson GK, Mitchell C, Thames HD, Armour EP. Direct evidence that prostate tumors show high sensitivity to fractionation (low alpha/beta ratio), similar to late-responding normal tissue. *Int J Radiat Oncol Biol Phys*. 2002;52(1):6-13. doi:10.1016/s0360-3016(01)02664-5
28. Miralbell R, Roberts SA, Zubizarreta E, Hendry JH. Dose-fractionation sensitivity of prostate cancer deduced from radiotherapy outcomes of 5,969 patients in seven international institutional datasets:  $\alpha/\beta = 1.4$  (0.9-2.2) Gy. *Int J Radiat Oncol Biol Phys*. 2012;82(1):e17-24. doi:10.1016/j.ijrobp.2010.10.075
29. Barra S, Belgioia L, Marcenaro M, et al. Moderate hypofractionated radiotherapy after prostatectomy for cancer patients: toxicity and clinical outcome. *Cancer Manag Res*. 2018;10:473-480. doi:10.2147/CMAR.S146131
30. Cozzarini C, Fiorino C, Deantoni C, et al. Higher-than-expected severe (Grade 3-4) late urinary toxicity after postprostatectomy hypofractionated radiotherapy: a single-institution analysis of 1176 patients. *Eur Urol*. 2014;66(6):1024-1030. doi:10.1016/j.eururo.2014.06.012
31. Cozzarini C, Fiorino C, Di Muzio N, et al. Hypofractionated adjuvant radiotherapy with helical tomotherapy after radical prostatectomy: planning data and toxicity



- 1  
2  
3 results of a Phase I-II study. *Radiother Oncol J Eur Soc Ther Radiol Oncol.*  
4 2008;88(1):26-33. doi:10.1016/j.radonc.2008.03.021  
5  
6 32. Fersino S, Tebano U, Mazzola R, et al. Moderate Hypofractionated  
7 Postprostatectomy Volumetric Modulated Arc Therapy With Daily Image  
8 Guidance (VMAT-IGRT): A Mono-institutional Report on Feasibility and Acute  
9 Toxicity. *Clin Genitourin Cancer.* 2017;15(4):e667-e673.  
10 doi:10.1016/j.clgc.2017.01.025  
11  
12 33. Ippolito E, Cellini N, Digesù C, et al. Postoperative intensity-modulated  
13 radiotherapy with simultaneous integrated boost in prostate cancer: a dose-  
14 escalation trial. *Urol Oncol.* 2013;31(1):87-92. doi:10.1016/j.urolonc.2010.10.005  
15  
16 34. Katayama S, Striecker T, Kessel K, et al. Hypofractionated IMRT of the prostate  
17 bed after radical prostatectomy: acute toxicity in the PRIAMOS-1 trial. *Int J*  
18 *Radiat Oncol Biol Phys.* 2014;90(4):926-933. doi:10.1016/j.ijrobp.2014.07.015  
19  
20 35. Krause S, Sterzing F, Neuhof D, Edler L, Debus J, Herfarth K. Hypofractionated  
21 helical intensity-modulated radiotherapy of the prostate bed after prostatectomy  
22 with or without the pelvic lymph nodes - the PRIAMOS trial. *BMC Cancer.*  
23 2012;12:504. doi:10.1186/1471-2407-12-504  
24  
25 36. Kruser TJ, Jarrard DF, Graf AK, et al. Early hypofractionated salvage  
26 radiotherapy for postprostatectomy biochemical recurrence. *Cancer.*  
27 2011;117(12):2629-2636. doi:10.1002/cncr.25824  
28  
29 37. Lewis SL, Patel P, Song H, et al. Image Guided Hypofractionated  
30 Postprostatectomy Intensity Modulated Radiation Therapy for Prostate Cancer.  
31 *Int J Radiat Oncol Biol Phys.* 2016;94(3):605-611.  
32 doi:10.1016/j.ijrobp.2015.11.025  
33  
34 38. Massacesi M, Cilla S, Deodato F, et al. Hypofractionated intensity-modulated  
35 radiotherapy with simultaneous integrated boost after radical prostatectomy:  
36 preliminary results of a phase II trial. *Anticancer Res.* 2013;33(6):2785-2789.  
37  
38 39. Arcangeli S, Gambardella P, Agolli L, et al. Stereotactic body radiation therapy  
39 salvage reirradiation of radiorecurrent prostatic carcinoma relapsed in the  
40 prostatic bed. *Tumori.* 2015;101(2):e57-9. doi:10.5301/tj.5000251  
41  
42 40. Ballas LK, Luo C, Chung E, et al. Phase 1 Trial of SBRT to the Prostate Fossa  
43 After Prostatectomy. *Int J Radiat Oncol Biol Phys.* 2019;104(1):50-60.  
44 doi:10.1016/j.ijrobp.2018.12.047  
45  
46 41. Caroli P, Colangione SP, De Giorgi U, et al. (68)Ga-PSMA-11 PET/CT-Guided  
47  
48  
49  
50  
51  
52  
53  
54  
55  
56  
57  
58  
59  
60

- 1  
2  
3 Stereotactic Body Radiation Therapy Retreatment in Prostate Cancer Patients  
4 with PSA Failure after Salvage Radiotherapy. *Biomedicines*. 2020;8(12).  
5 doi:10.3390/biomedicines8120536  
6  
7  
8 42. Detti B, Bonomo P, Masi L, et al. CyberKnife stereotactic radiotherapy for isolated  
9 recurrence in the prostatic bed. *World J Urol*. 2016;34(3):311-317.  
10 doi:10.1007/s00345-015-1613-5  
11  
12  
13 43. Francolini G, Jereczek-Fossa BA, Di Cataldo V, et al. Stereotactic radiotherapy  
14 for prostate bed recurrence after prostatectomy, a multicentric series. *BJU Int*.  
15 2020;125(3):417-425. doi:10.1111/bju.14924  
16  
17  
18 44. Jereczek-Fossa BA, Rojas DP, Zerini D, et al. Reirradiation for isolated local  
19 recurrence of prostate cancer: Mono-institutional series of 64 patients treated  
20 with salvage stereotactic body radiotherapy (SBRT). *Br J Radiol*.  
21 2019;92(1094):20180494. doi:10.1259/bjr.20180494  
22  
23  
24 45. Olivier J, Basson L, Puech P, et al. Stereotactic Re-irradiation for Local  
25 Recurrence in the Prostatic Bed After Prostatectomy: Preliminary Results. *Front*  
26 *Oncol*. 2019;9:71. doi:10.3389/fonc.2019.00071  
27  
28  
29 46. Sampath S, Frankel P, Vecchio B Del, et al. Stereotactic Body Radiation Therapy  
30 to the Prostate Bed: Results of a Phase 1 Dose-Escalation Trial. *Int J Radiat*  
31 *Oncol Biol Phys*. 2020;106(3):537-545. doi:10.1016/j.ijrobp.2019.11.005  
32  
33  
34 47. Scher N, Bauduceau O, Bollet M, et al. Stereotactic prostate focal reirradiation  
35 therapy for local recurrence: preliminary results of Hartmann Oncology  
36 Radiotherapy Group. *BJR open*. 2019;1(1):20180027. doi:10.1259/bjro.20180027  
37  
38  
39 48. Zerini D, Jereczek-Fossa BA, Fodor C, et al. Salvage image-guided intensity  
40 modulated or stereotactic body reirradiation of local recurrence of prostate  
41 cancer. *Br J Radiol*. 2015;88(1052):20150197. doi:10.1259/bjr.20150197  
42  
43  
44 49. Ferlay J, Soerjomataram I, Dikshit R, et al. Cancer incidence and mortality  
45 worldwide: sources, methods and major patterns in GLOBOCAN 2012. *Int J*  
46 *cancer*. 2015;136(5):E359-86. doi:10.1002/ijc.29210  
47  
48  
49 50. Cooperberg MR, Broering JM, Carroll PR. Time trends and local variation in  
50 primary treatment of localized prostate cancer. *J Clin Oncol Off J Am Soc Clin*  
51 *Oncol*. 2010;28(7):1117-1123. doi:10.1200/JCO.2009.26.0133  
52  
53  
54 51. Han M, Partin AW, Pound CR, Epstein JI, Walsh PC. Long-term biochemical  
55 disease-free and cancer-specific survival following anatomic radical retropubic  
56 prostatectomy. The 15-year Johns Hopkins experience. *Urol Clin North Am*.  
57  
58  
59  
60



- 2001;28(3):555-565. doi:10.1016/s0094-0143(05)70163-4
52. Chun FK-H, Graefen M, Zacharias M, et al. Anatomic radical retropubic prostatectomy-long-term recurrence-free survival rates for localized prostate cancer. *World J Urol.* 2006;24(3):273-280. doi:10.1007/s00345-006-0058-2
53. Amling CL, Blute ML, Bergstralh EJ, Seay TM, Slezak J, Zincke H. Long-term hazard of progression after radical prostatectomy for clinically localized prostate cancer: continued risk of biochemical failure after 5 years. *J Urol.* 2000;164(1):101-105.
54. Bianco FJJ, Scardino PT, Eastham JA. Radical prostatectomy: long-term cancer control and recovery of sexual and urinary function ("trifecta"). *Urology.* 2005;66(5 Suppl):83-94. doi:10.1016/j.urology.2005.06.116
55. Swanson GP, Hussey MA, Tangen CM, et al. Predominant treatment failure in postprostatectomy patients is local: analysis of patterns of treatment failure in SWOG 8794. *J Clin Oncol Off J Am Soc Clin Oncol.* 2007;25(16):2225-2229. doi:10.1200/JCO.2006.09.6495
56. Pound CR, Partin AW, Eisenberger MA, Chan DW, Pearson JD, Walsh PC. Natural history of progression after PSA elevation following radical prostatectomy. *JAMA.* 1999;281(17):1591-1597. doi:10.1001/jama.281.17.1591
57. Thompson IM, Tangen CM, Paradelo J, et al. Adjuvant radiotherapy for pathological T3N0M0 prostate cancer significantly reduces risk of metastases and improves survival: long-term followup of a randomized clinical trial. *J Urol.* 2009;181(3):956-962. doi:10.1016/j.juro.2008.11.032
58. Mahal BA, Hoffman KE, Efstathiou JA, Nguyen PL. National trends in the recommendation of radiotherapy after prostatectomy for prostate cancer before and after the reporting of a survival benefit in March 2009. *Clin Genitourin Cancer.* 2015;13(3):e167-72. doi:10.1016/j.clgc.2014.12.005
59. Fossati N, Karnes RJ, Cozzarini C, et al. Assessing the Optimal Timing for Early Salvage Radiation Therapy in Patients with Prostate-specific Antigen Rise After Radical Prostatectomy. *Eur Urol.* 2016;69(4):728-733. doi:10.1016/j.eururo.2015.10.009
60. Stephenson AJ, Scardino PT, Kattan MW, et al. Predicting the outcome of salvage radiation therapy for recurrent prostate cancer after radical prostatectomy. *J Clin Oncol Off J Am Soc Clin Oncol.* 2007;25(15):2035-2041. doi:10.1200/JCO.2006.08.9607

- 1  
2  
3 61. Tendulkar RD, Agrawal S, Gao T, et al. Contemporary Update of a Multi-  
4 Institutional Predictive Nomogram for Salvage Radiotherapy After Radical  
5 Prostatectomy. *J Clin Oncol Off J Am Soc Clin Oncol*. 2016;34(30):3648-3654.  
6 doi:10.1200/JCO.2016.67.9647  
7  
8
- 9  
10 62. Dal Pra A, Cury FL, Souhami L. Combining radiation therapy and androgen  
11 deprivation for localized prostate cancer-a critical review. *Curr Oncol*.  
12 2010;17(5):28-38. doi:10.3747/co.v17i5.632  
13  
14
- 15 63. Shipley WU, Seiferheld W, Lukka HR, et al. Radiation with or without  
16 Antiandrogen Therapy in Recurrent Prostate Cancer. *N Engl J Med*.  
17 2017;376(5):417-428. doi:10.1056/NEJMoa1607529  
18  
19
- 20 64. Carrie C, Magné N, Burban-Provost P, et al. Short-term androgen deprivation  
21 therapy combined with radiotherapy as salvage treatment after radical  
22 prostatectomy for prostate cancer (GETUG-AFU 16): a 112-month follow-up of a  
23 phase 3, randomised trial. *Lancet Oncol*. 2019;20(12):1740-1749.  
24 doi:10.1016/S1470-2045(19)30486-3  
25  
26  
27
- 28 65. Panebianco V, Villeirs G, Weinreb JC, et al. Prostate Magnetic Resonance  
29 Imaging for Local Recurrence Reporting (PI-RR): International Consensus -  
30 based Guidelines on Multiparametric Magnetic Resonance Imaging for Prostate  
31 Cancer Recurrence after Radiation Therapy and Radical Prostatectomy. *Eur Urol*  
32 *Oncol*. Published online February 2021. doi:10.1016/j.euo.2021.01.003  
33  
34  
35
- 36 66. De Visschere PJL, Standaert C, Fütterer JJ, et al. A Systematic Review on the  
37 Role of Imaging in Early Recurrent Prostate Cancer. *Eur Urol Oncol*.  
38 2019;2(1):47-76. doi:10.1016/j.euo.2018.09.010  
39  
40  
41
- 42 67. Vargas HA, Wassberg C, Akin O, Hricak H. MR imaging of treated prostate  
43 cancer. *Radiology*. 2012;262(1):26-42. doi:10.1148/radiol.11101996  
44  
45
- 46 68. Barchetti F, Panebianco V. Multiparametric MRI for recurrent prostate cancer post  
47 radical prostatectomy and postradiation therapy. *Biomed Res Int*.  
48 2014;2014:316272. doi:10.1155/2014/316272  
49  
50
- 51 69. Rouvière O, Vitry T, Lyonnet D. Imaging of prostate cancer local recurrences: why  
52 and how? *Eur Radiol*. 2010;20(5):1254-1266. doi:10.1007/s00330-009-1647-4  
53  
54
- 55 70. Casciani E, Polettini E, Carmenini E, et al. Endorectal and dynamic contrast-  
56 enhanced MRI for detection of local recurrence after radical prostatectomy. *AJR*  
57 *Am J Roentgenol*. 2008;190(5):1187-1192. doi:10.2214/AJR.07.3032  
58  
59
- 60 71. Panebianco V, Barchetti F, Sciarra A, et al. Prostate cancer recurrence after

- radical prostatectomy: the role of 3-T diffusion imaging in multi-parametric magnetic resonance imaging. *Eur Radiol.* 2013;23(6):1745-1752.  
doi:10.1007/s00330-013-2768-3
72. Kitajima K, Hartman RP, Froemming AT, Hagen CE, Takahashi N, Kawashima A. Detection of Local Recurrence of Prostate Cancer After Radical Prostatectomy Using Endorectal Coil MRI at 3 T: Addition of DWI and Dynamic Contrast Enhancement to T2-Weighted MRI. *AJR Am J Roentgenol.* 2015;205(4):807-816.  
doi:10.2214/AJR.14.14275
73. Litwin MS, Tan H-J. The Diagnosis and Treatment of Prostate Cancer: A Review. *JAMA.* 2017;317(24):2532-2542. doi:10.1001/jama.2017.7248
74. Wiegel T, Lohm G, Bottke D, et al. Achieving an undetectable PSA after radiotherapy for biochemical progression after radical prostatectomy is an independent predictor of biochemical outcome--results of a retrospective study. *Int J Radiat Oncol Biol Phys.* 2009;73(4):1009-1016.  
doi:10.1016/j.ijrobp.2008.06.1922
75. Bottke D, Bartkowiak D, Siegmann A, et al. Effect of early salvage radiotherapy at PSA < 0.5 ng/ml and impact of post-SRT PSA nadir in post-prostatectomy recurrent prostate cancer. *Prostate Cancer Prostatic Dis.* 2019;22(2):344-349.  
doi:10.1038/s41391-018-0112-3
76. Ghosh A, Heston WDW. Tumor target prostate specific membrane antigen (PSMA) and its regulation in prostate cancer. *J Cell Biochem.* 2004;91(3):528-539. doi:10.1002/jcb.10661
77. Eiber M, Maurer T, Souvatzoglou M, et al. Evaluation of Hybrid <sup>68</sup>Ga-PSMA Ligand PET/CT in 248 Patients with Biochemical Recurrence After Radical Prostatectomy. *J Nucl Med.* 2015;56(5):668-674. doi:10.2967/jnumed.115.154153
78. Afshar-Oromieh A, Holland-Letz T, Giesel FL, et al. Diagnostic performance of (68)Ga-PSMA-11 (HBED-CC) PET/CT in patients with recurrent prostate cancer: evaluation in 1007 patients. *Eur J Nucl Med Mol Imaging.* 2017;44(8):1258-1268.  
doi:10.1007/s00259-017-3711-7
79. Miksch J, Bottke D, Krohn T, et al. Interobserver variability, detection rate, and lesion patterns of (68)Ga-PSMA-11-PET/CT in early-stage biochemical recurrence of prostate cancer after radical prostatectomy. *Eur J Nucl Med Mol Imaging.* 2020;47(10):2339-2347. doi:10.1007/s00259-020-04718-w
80. Bluemel C, Krebs M, Polat B, et al. 68Ga-PSMA-PET/CT in Patients With

- 1  
2  
3 Biochemical Prostate Cancer Recurrence and Negative 18F-Choline-PET/CT.  
4 *Clin Nucl Med.* 2016;41(7):515-521. doi:10.1097/RLU.0000000000001197  
5  
6 81. Cirillo S, Petracchini M, Scotti L, et al. Endorectal magnetic resonance imaging at  
7 1.5 Tesla to assess local recurrence following radical prostatectomy using T2-  
8 weighted and contrast-enhanced imaging. *Eur Radiol.* 2009;19(3):761-769.  
9 doi:10.1007/s00330-008-1174-8  
10  
11 82. Fendler WP, Eiber M, Beheshti M, et al. (68)Ga-PSMA PET/CT: Joint EANM and  
12 SNMMI procedure guideline for prostate cancer imaging: version 1.0. *Eur J Nucl*  
13 *Med Mol Imaging.* 2017;44(6):1014-1024. doi:10.1007/s00259-017-3670-z  
14  
15 83. Fowler JF. The radiobiology of prostate cancer including new aspects of  
16 fractionated radiotherapy. *Acta Oncol.* 2005;44(3):265-276.  
17 doi:10.1080/02841860410002824  
18  
19 84. Morgan SC, Hoffman K, Loblaw DA, et al. Hypofractionated Radiation Therapy for  
20 Localized Prostate Cancer: An ASTRO, ASCO, and AUA Evidence-Based  
21 Guideline. *J Urol.* Published online October 2018. doi:10.1016/j.juro.2018.10.001  
22  
23 85. Hickey BE, James ML, Daly T, Soh F-Y, Jeffery M. Hypofractionation for clinically  
24 localized prostate cancer. *Cochrane database Syst Rev.* 2019;9(9):CD011462.  
25 doi:10.1002/14651858.CD011462.pub2  
26  
27 86. Jackson WC, Silva J, Hartman HE, et al. Stereotactic Body Radiation Therapy for  
28 Localized Prostate Cancer: A Systematic Review and Meta-Analysis of Over  
29 6,000 Patients Treated On Prospective Studies. *Int J Radiat Oncol Biol Phys.*  
30 2019;104(4):778-789. doi:10.1016/j.ijrobp.2019.03.051  
31  
32 87. Brand DH, Tree AC, Ostler P, et al. Intensity-modulated fractionated radiotherapy  
33 versus stereotactic body radiotherapy for prostate cancer (PACE-B): acute  
34 toxicity findings from an international, randomised, open-label, phase 3, non-  
35 inferiority trial. *Lancet Oncol.* 2019;20(11):1531-1543. doi:10.1016/S1470-  
36 2045(19)30569-8  
37  
38 88. Wolf F, Sedlmayer F, Aebbersold D, et al. Ultrahypofractionation of localized  
39 prostate cancer : Statement from the DEGRO working group prostate cancer.  
40 *Strahlenther Onkol.* 2021;197(2):89-96. doi:10.1007/s00066-020-01723-8  
41  
42 89. Lehrer EJ, Kishan AU, Yu JB, et al. Ultrahypofractionated versus hypofractionated  
43 and conventionally fractionated radiation therapy for localized prostate cancer: A  
44 systematic review and meta-analysis of phase III randomized trials. *Radiother*  
45 *Oncol J Eur Soc Ther Radiol Oncol.* 2020;148:235-242.  
46  
47  
48  
49  
50  
51  
52  
53  
54  
55  
56  
57  
58  
59  
60

doi:10.1016/j.radonc.2020.04.037

90. Trial D, Sampath S, Frankel P, et al. Stereotactic Body Radiation Therapy to the Prostate Bed : Results of a Phase 1. *Radiat Oncol Biol*. 2020;106(3):537-545.

doi:10.1016/j.ijrobp.2019.11.005

91. Francolini G, Alicja B, Fossa J, et al. Stereotactic or conventional radiotherapy for macroscopic prostate bed recurrence : a propensity score analysis. *Radiol Med*. 2022;(0123456789). doi:10.1007/s11547-022-01465-w

## 12 APPENDICES

### Appendix 1 TNM Classification according to UICC 2009

#### T - Primary tumor

*pT: pathological tumor classification*

Tx Primary tumor cannot be assessed

T0 No evidence of primary tumor

T1 Clinically unapparent tumor not palpable or visible by imaging

T1a Tumor incidental histological finding in 5% or less of tissue resected

T1b Tumor incidental histological finding in more than 5% of tissue resected

T1c Tumor identified by needle biopsy (e.g., because of elevated PSA)

T2 Tumor confined within the prostate

T2a Tumor involves one half of one lobe or less

T2b Tumor involves more than one half of one lobe but not both lobes

T2c Tumor involves both lobes

T3 Tumor extends through the prostate capsule

T3a Extracapsular extension (unilateral or bilateral) including microscopic bladder neck involvement

T3b Tumor invades seminal vesicle(s)

T4 Tumor is fixed or invades adjacent structures other than seminal vesicles: external sphincter, rectum, levator muscles, and/or pelvic wall

#### N - Regional lymph nodes

*cN: clinical regional lymph node classification*

*pN: pathological regional lymph node classification*

Nx Regional lymph nodes cannot be assessed

N0 No regional lymph node metastasis

N1 Regional lymph node metastasis

#### M - Distant metastases

Mx Distant metastasis cannot be assessed

M0 No distant metastasis

M1 Distant metastasis

M1a Nonregional lymph node(s)

M1b Bone(s)

M1c Other site(s)

## Appendix 2 Pre-registration imaging (PSMA PET CT):

For the detection of local recurrence using hybrid imaging several, PSMA-tracers are clinically available, such as  $^{68}\text{Ga}$ -PSMA-11,  $^{18}\text{F}$ -PSMA-1007, and  $^{18}\text{F}$ -DCFPYL (Pylarify - piflufolastat F 18). Imaging is usually performed as a whole-body PET/CT for the detection of local recurrence and distant metastases.

Imaging protocol should contain:

- The radiochemical purity of the radiotracer should be greater than or equal to 95% in high performance liquid chromatography (HPLC) and Thin Layer Chromatography (TLC)
- Free  $^{18}\text{F}$ -fluoride or  $^{68}\text{Ga}$ -eluate should be the major impurity.
- i.v. application of the radiotracer is beneficial
- regarding the specific tracer a tracer-individual uptake period from application to imaging is recommended:
  - o 60 min p.i. for  $^{68}\text{Ga}$ -PSMA-11
  - o 90-120 min p.i. for  $^{18}\text{F}$ -PSMA-1007
  - o 60 min p.i. for  $^{18}\text{F}$ -DCFPYL
- PET scans should be acquired in the 3D mode
  - o with an acquisition time of 1.5 min/bed position
  - o by continues bed movement or
  - o using a whole-body PET/CT scanner.
- Emission data using bed position PET/CT scanners should be corrected for scatter and attenuation and reconstructed iteratively with an OSEM algorithm (2 iterations and 21 subsets) followed by a postreconstruction smoothing gaussian filter.
- Whole body PET images at Inselspital Bern using the Siemens Quadra or Siemens Biograph Vision 600 will be reconstructed with the same reconstruction parameters for both systems in 3D with a zoom factor of 1.0. Emission data need to be corrected for randoms, scatter and decay, and reconstruction with the vendor's time of flight (TOF) point-spread-function (PSF) algorithm with 4 iterations and 5 subsets.

Image interpretation: Focal uptake of  $^{68}\text{Ga}$ -PSMA-11,  $^{18}\text{F}$ -PSMA-1007, and  $^{18}\text{F}$ -DCFPYL higher than the surrounding background and not associated with physiologic uptake is considered suggestive of malignancy. Typical pitfalls in PSMA ligand PET imaging need to be known (e.g., celiac and other ganglia for  $^{18}\text{F}$ -PSMA-1007, fractures and degenerative changes for all fluorinated radiotracers, and perfusion effects in inflammatory lymph nodes for all tracers).



### Appendix 3 Pre-treatment imaging (mpMRI)

In order to define the extension of macroscopic local recurrence, a mpMRI of the pelvis with i.v. Gadolinium is mandatory after biochemical progression upon RP

MRI should preferably be performed on a 3T MR unit; if not available a 1.5T MR unit can also be accepted. There is no need for an endorectal coil. MRI should cover the entire pelvis from the aortic bifurcation to the inferior border of the pubic symphysis. Ideally, air in the rectum should be minimized by emptying the rectum by applying local guidelines. The following sequences should be performed:

- Coronal T2-weighted sequence with isotropic voxels (1mm) covering the entire pelvis allowing reconstruction in the axial and sagittal plane.
- Axial T2-weighted high resolution covering the former prostatic bed including seminal vesicles (3mm slice thickness, no gap)
- Dynamic axial T1-weighted sequence (Dotarem®) including prostatic bed and seminal vesicles with high spatial resolution and slice thickness of 3mm.
- A T1-weighted sequence before administration of Gadolinium has to be added.
- Diffusion-weighted MRI (DW-MRI) in the axial plane covering the entire pelvis with slice thickness of 4mm and b-values of 0, 500 and 1000 sec/mm<sup>2</sup> in order to detect lymph node metastases and local recurrence.
- Diffusion-weighted MRI (Zoomit) with limited field of view (former prostate and seminal vesicle bed) and b-values of 0, 500, 1000 and 2000 sec/mm<sup>2</sup>.
- Axial T1-weighted fat saturated sequence covering the entire pelvis (4mm slice thickness).

Image interpretation: Local recurrence is defined as the following: soft tissue mass on T1- and T2-weighted sequences with early contrast medium enhancement on DCE-MRI. DW-MRI is analyzed qualitatively: tumor recurrence shows a high signal intensity focal lesion on the high b-value image corresponding to a low signal intensity lesion on the corresponding Apparent Diffusion Coefficient (ADC) map (impeded diffusion due to high cellularity).



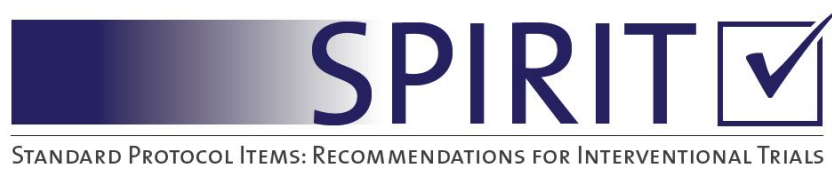

SPIRIT 2013 Checklist: Recommended items to address in a clinical trial protocol and related documents\*

| Section/item                      | Item No | Description                                                                                                                                                                                                                                                                              | Page No [line No] |
|-----------------------------------|---------|------------------------------------------------------------------------------------------------------------------------------------------------------------------------------------------------------------------------------------------------------------------------------------------|-------------------|
| <b>Administrative information</b> |         |                                                                                                                                                                                                                                                                                          |                   |
| Title                             | 1       | Descriptive title identifying the study design, population, interventions, and, if applicable, trial acronym                                                                                                                                                                             | 1 [1-3]           |
| Trial registration                | 2a      | Trial identifier and registry name. If not yet registered, name of intended registry                                                                                                                                                                                                     | 5 [94-98]         |
|                                   | 2b      | All items from the World Health Organization Trial Registration Data Set                                                                                                                                                                                                                 | 5 [94-98]         |
| Protocol version                  | 3       | Date and version identifier                                                                                                                                                                                                                                                              | 5 [94-98]         |
| Funding                           | 4       | Sources and types of financial, material, and other support                                                                                                                                                                                                                              | 18 [353-354]      |
| Roles and responsibilities        | 5a      | Names, affiliations, and roles of protocol contributors                                                                                                                                                                                                                                  | 18 [349-352]      |
|                                   | 5b      | Name and contact information for the trial sponsor                                                                                                                                                                                                                                       | 18 [353-354]      |
|                                   | 5c      | Role of study sponsor and funders, if any, in study design; collection, management, analysis, and interpretation of data; writing of the report; and the decision to submit the report for publication, including whether they will have ultimate authority over any of these activities | 18 [349-355]      |
|                                   | 5d      | Composition, roles, and responsibilities of the coordinating centre, steering committee, endpoint adjudication committee, data management team, and other individuals or groups overseeing the trial, if applicable (see Item 21a for data monitoring committee)                         | 18 [349-355]      |
| <b>Introduction</b>               |         |                                                                                                                                                                                                                                                                                          |                   |
| Background and rationale          | 6a      | Description of research question and justification for undertaking the trial, including summary of relevant studies (published and unpublished) examining benefits and harms for each intervention                                                                                       | 4 [61-89]         |
|                                   | 6b      | Explanation for choice of comparators                                                                                                                                                                                                                                                    | 4 [61-89]         |
| Objectives                        | 7       | Specific objectives or hypotheses                                                                                                                                                                                                                                                        | 4 [90-92]         |

|    |                                                           |     |                                                                                                                                                                                                                                                                                                                                                                                |                             |
|----|-----------------------------------------------------------|-----|--------------------------------------------------------------------------------------------------------------------------------------------------------------------------------------------------------------------------------------------------------------------------------------------------------------------------------------------------------------------------------|-----------------------------|
| 1  |                                                           |     |                                                                                                                                                                                                                                                                                                                                                                                |                             |
| 2  | Trial design                                              | 8   | Description of trial design including type of trial (eg, parallel group, crossover, factorial, single group), allocation ratio, and framework (eg, superiority, equivalence, noninferiority, exploratory)                                                                                                                                                                      | 4 [90-92]                   |
| 3  |                                                           |     |                                                                                                                                                                                                                                                                                                                                                                                |                             |
| 4  |                                                           |     |                                                                                                                                                                                                                                                                                                                                                                                |                             |
| 5  |                                                           |     |                                                                                                                                                                                                                                                                                                                                                                                |                             |
| 6  |                                                           |     |                                                                                                                                                                                                                                                                                                                                                                                |                             |
| 7  |                                                           |     |                                                                                                                                                                                                                                                                                                                                                                                |                             |
| 8  | <b>Methods: Participants, interventions, and outcomes</b> |     |                                                                                                                                                                                                                                                                                                                                                                                |                             |
| 9  |                                                           |     |                                                                                                                                                                                                                                                                                                                                                                                |                             |
| 10 | Study setting                                             | 9   | Description of study settings (eg, community clinic, academic hospital) and list of countries where data will be collected. Reference to where list of study sites can be obtained                                                                                                                                                                                             | 6 [137-148]                 |
| 11 |                                                           |     |                                                                                                                                                                                                                                                                                                                                                                                |                             |
| 12 |                                                           |     |                                                                                                                                                                                                                                                                                                                                                                                |                             |
| 13 |                                                           |     |                                                                                                                                                                                                                                                                                                                                                                                |                             |
| 14 | Eligibility criteria                                      | 10  | Inclusion and exclusion criteria for participants. If applicable, eligibility criteria for study centres and individuals who will perform the interventions (eg, surgeons, psychotherapists)                                                                                                                                                                                   | 5,6 [99-135]                |
| 15 |                                                           |     |                                                                                                                                                                                                                                                                                                                                                                                |                             |
| 16 |                                                           |     |                                                                                                                                                                                                                                                                                                                                                                                |                             |
| 17 |                                                           |     |                                                                                                                                                                                                                                                                                                                                                                                |                             |
| 18 |                                                           |     |                                                                                                                                                                                                                                                                                                                                                                                |                             |
| 19 | Interventions                                             | 11a | Interventions for each group with sufficient detail to allow replication, including how and when they will be administered                                                                                                                                                                                                                                                     | 7,8,9,10 [158-246]          |
| 20 |                                                           |     |                                                                                                                                                                                                                                                                                                                                                                                |                             |
| 21 |                                                           |     |                                                                                                                                                                                                                                                                                                                                                                                |                             |
| 22 |                                                           | 11b | Criteria for discontinuing or modifying allocated interventions for a given trial participant (eg, drug dose change in response to harms, participant request, or improving/worsening disease)                                                                                                                                                                                 | 7,8,9,10 [158-246]          |
| 23 |                                                           |     |                                                                                                                                                                                                                                                                                                                                                                                |                             |
| 24 |                                                           |     |                                                                                                                                                                                                                                                                                                                                                                                |                             |
| 25 |                                                           |     |                                                                                                                                                                                                                                                                                                                                                                                |                             |
| 26 |                                                           | 11c | Strategies to improve adherence to intervention protocols, and any procedures for monitoring adherence (eg, drug tablet return, laboratory tests)                                                                                                                                                                                                                              | 7,8,9,10 [158-246]          |
| 27 |                                                           |     |                                                                                                                                                                                                                                                                                                                                                                                |                             |
| 28 |                                                           |     |                                                                                                                                                                                                                                                                                                                                                                                |                             |
| 29 |                                                           |     |                                                                                                                                                                                                                                                                                                                                                                                |                             |
| 30 |                                                           |     |                                                                                                                                                                                                                                                                                                                                                                                |                             |
| 31 |                                                           | 11d | Relevant concomitant care and interventions that are permitted or prohibited during the trial                                                                                                                                                                                                                                                                                  | 7,8,9,10 [158-246]          |
| 32 |                                                           |     |                                                                                                                                                                                                                                                                                                                                                                                |                             |
| 33 |                                                           |     |                                                                                                                                                                                                                                                                                                                                                                                |                             |
| 34 | Outcomes                                                  | 12  | Primary, secondary, and other outcomes, including the specific measurement variable (eg, systolic blood pressure), analysis metric (eg, change from baseline, final value, time to event), method of aggregation (eg, median, proportion), and time point for each outcome. Explanation of the clinical relevance of chosen efficacy and harm outcomes is strongly recommended | 7 [149-157]                 |
| 35 |                                                           |     |                                                                                                                                                                                                                                                                                                                                                                                |                             |
| 36 |                                                           |     |                                                                                                                                                                                                                                                                                                                                                                                |                             |
| 37 |                                                           |     |                                                                                                                                                                                                                                                                                                                                                                                |                             |
| 38 |                                                           |     |                                                                                                                                                                                                                                                                                                                                                                                |                             |
| 39 |                                                           |     |                                                                                                                                                                                                                                                                                                                                                                                |                             |
| 40 |                                                           |     |                                                                                                                                                                                                                                                                                                                                                                                |                             |
| 41 |                                                           |     |                                                                                                                                                                                                                                                                                                                                                                                |                             |
| 42 | Participant timeline                                      | 13  | Time schedule of enrolment, interventions (including any run-ins and washouts), assessments, and visits for participants. A schematic diagram is highly recommended (see Figure)                                                                                                                                                                                               | 6 [137-148]<br>See figure 1 |
| 43 |                                                           |     |                                                                                                                                                                                                                                                                                                                                                                                |                             |
| 44 |                                                           |     |                                                                                                                                                                                                                                                                                                                                                                                |                             |
| 45 |                                                           |     |                                                                                                                                                                                                                                                                                                                                                                                |                             |
| 46 |                                                           |     |                                                                                                                                                                                                                                                                                                                                                                                |                             |
| 47 | Sample size                                               | 14  | Estimated number of participants needed to achieve study objectives and how it was determined, including clinical and statistical assumptions supporting any sample size calculations                                                                                                                                                                                          | 6 [137-148]                 |
| 48 |                                                           |     |                                                                                                                                                                                                                                                                                                                                                                                |                             |
| 49 |                                                           |     |                                                                                                                                                                                                                                                                                                                                                                                |                             |
| 50 |                                                           |     |                                                                                                                                                                                                                                                                                                                                                                                |                             |
| 51 | Recruitment                                               | 15  | Strategies for achieving adequate participant enrolment to reach target sample size                                                                                                                                                                                                                                                                                            | 6 [137-148]                 |
| 52 |                                                           |     |                                                                                                                                                                                                                                                                                                                                                                                |                             |
| 53 |                                                           |     |                                                                                                                                                                                                                                                                                                                                                                                |                             |

#### Methods: Assignment of interventions (for controlled trials)

Allocation: NA

|    |                                                           |     |                                                                    |               |
|----|-----------------------------------------------------------|-----|--------------------------------------------------------------------|---------------|
| 1  |                                                           |     |                                                                    |               |
| 2  | Sequence                                                  | 16a | Method of generating the allocation sequence (eg, computer-        | NA            |
| 3  | generation                                                |     | generated random numbers), and list of any factors for             |               |
| 4  |                                                           |     | stratification. To reduce predictability of a random sequence,     |               |
| 5  |                                                           |     | details of any planned restriction (eg, blocking) should be        |               |
| 6  |                                                           |     | provided in a separate document that is unavailable to those       |               |
| 7  |                                                           |     | who enrol participants or assign interventions                     |               |
| 8  |                                                           |     |                                                                    |               |
| 9  |                                                           |     |                                                                    |               |
| 10 | Allocation                                                | 16b | Mechanism of implementing the allocation sequence (eg,             | NA            |
| 11 | concealment                                               |     | central telephone; sequentially numbered, opaque, sealed           |               |
| 12 | mechanism                                                 |     | envelopes), describing any steps to conceal the sequence until     |               |
| 13 |                                                           |     | interventions are assigned                                         |               |
| 14 |                                                           |     |                                                                    |               |
| 15 | Implementatio                                             | 16c | Who will generate the allocation sequence, who will enrol          | NA            |
| 16 | n                                                         |     | participants, and who will assign participants to interventions    |               |
| 17 |                                                           |     |                                                                    |               |
| 18 |                                                           |     |                                                                    |               |
| 19 | Blinding                                                  | 17a | Who will be blinded after assignment to interventions (eg, trial   | NA            |
| 20 | (masking)                                                 |     | participants, care providers, outcome assessors, data              |               |
| 21 |                                                           |     | analysts), and how                                                 |               |
| 22 |                                                           |     |                                                                    |               |
| 23 |                                                           | 17b | If blinded, circumstances under which unblinding is permissible,   | NA            |
| 24 |                                                           |     | and procedure for revealing a participant's allocated              |               |
| 25 |                                                           |     | intervention during the trial                                      |               |
| 26 |                                                           |     |                                                                    |               |
| 27 |                                                           |     |                                                                    |               |
| 28 | <b>Methods: Data collection, management, and analysis</b> |     |                                                                    |               |
| 29 |                                                           |     |                                                                    |               |
| 30 | Data collection                                           | 18a | Plans for assessment and collection of outcome, baseline, and      | 6,7 [137-158] |
| 31 | methods                                                   |     | other trial data, including any related processes to promote       |               |
| 32 |                                                           |     | data quality (eg, duplicate measurements, training of              |               |
| 33 |                                                           |     | assessors) and a description of study instruments (eg,             |               |
| 34 |                                                           |     | questionnaires, laboratory tests) along with their reliability and |               |
| 35 |                                                           |     | validity, if known. Reference to where data collection forms can   |               |
| 36 |                                                           |     | be found, if not in the protocol                                   |               |
| 37 |                                                           |     |                                                                    |               |
| 38 |                                                           |     |                                                                    |               |
| 39 |                                                           | 18b | Plans to promote participant retention and complete follow-up,     | 6,7 [137-158] |
| 40 |                                                           |     | including list of any outcome data to be collected for             |               |
| 41 |                                                           |     | participants who discontinue or deviate from intervention          |               |
| 42 |                                                           |     | protocols                                                          |               |
| 43 |                                                           |     |                                                                    |               |
| 44 |                                                           |     |                                                                    |               |
| 45 | Data                                                      | 19  | Plans for data entry, coding, security, and storage, including     |               |
| 46 | management                                                |     | any related processes to promote data quality (eg, double data     |               |
| 47 |                                                           |     | entry; range checks for data values). Reference to where           |               |
| 48 |                                                           |     | details of data management procedures can be found, if not in      |               |
| 49 |                                                           |     | the protocol                                                       |               |
| 50 |                                                           |     |                                                                    |               |
| 51 |                                                           |     |                                                                    |               |
| 52 | Statistical                                               | 20a | Statistical methods for analysing primary and secondary            | 11 [247-263]  |
| 53 | methods                                                   |     | outcomes. Reference to where other details of the statistical      |               |
| 54 |                                                           |     | analysis plan can be found, if not in the protocol                 |               |
| 55 |                                                           |     |                                                                    |               |
| 56 |                                                           | 20b | Methods for any additional analyses (eg, subgroup and              | 11 [247-263]  |
| 57 |                                                           |     | adjusted analyses)                                                 |               |
| 58 |                                                           |     |                                                                    |               |
| 59 |                                                           |     |                                                                    |               |
| 60 |                                                           |     |                                                                    |               |

|    |                                 |     |                                                                     |              |
|----|---------------------------------|-----|---------------------------------------------------------------------|--------------|
| 1  |                                 |     |                                                                     |              |
| 2  |                                 | 20c | Definition of analysis population relating to protocol non-         | 11 [247-263] |
| 3  |                                 |     | adherence (eg, as randomised analysis), and any statistical         |              |
| 4  |                                 |     | methods to handle missing data (eg, multiple imputation)            |              |
| 5  |                                 |     |                                                                     |              |
| 6  | <b>Methods: Monitoring</b>      |     |                                                                     |              |
| 7  |                                 |     |                                                                     |              |
| 8  | Data monitoring                 | 21a | Composition of data monitoring committee (DMC); summary of          | 6 [137-148]  |
| 9  |                                 |     | its role and reporting structure; statement of whether it is        |              |
| 10 |                                 |     | independent from the sponsor and competing interests; and           |              |
| 11 |                                 |     | reference to where further details about its charter can be         |              |
| 12 |                                 |     | found, if not in the protocol. Alternatively, an explanation of why |              |
| 13 |                                 |     | a DMC is not needed                                                 |              |
| 14 |                                 |     |                                                                     |              |
| 15 |                                 |     |                                                                     |              |
| 16 |                                 | 21b | Description of any interim analyses and stopping guidelines,        | NA           |
| 17 |                                 |     | including who will have access to these interim results and         |              |
| 18 |                                 |     | make the final decision to terminate the trial                      |              |
| 19 |                                 |     |                                                                     |              |
| 20 |                                 |     |                                                                     |              |
| 21 | Harms                           | 22  | Plans for collecting, assessing, reporting, and managing            | 6 [137-148]  |
| 22 |                                 |     | solicited and spontaneously reported adverse events and other       |              |
| 23 |                                 |     | unintended effects of trial interventions or trial conduct          |              |
| 24 |                                 |     |                                                                     |              |
| 25 | Auditing                        | 23  | Frequency and procedures for auditing trial conduct, if any, and    | NA           |
| 26 |                                 |     | whether the process will be independent from investigators and      |              |
| 27 |                                 |     | the sponsor                                                         |              |
| 28 |                                 |     |                                                                     |              |
| 29 |                                 |     |                                                                     |              |
| 30 | <b>Ethics and dissemination</b> |     |                                                                     |              |
| 31 |                                 |     |                                                                     |              |
| 32 | Research ethics                 | 24  | Plans for seeking research ethics committee/institutional review    | 5 [94-98]    |
| 33 | approval                        |     | board (REC/IRB) approval                                            |              |
| 34 |                                 |     |                                                                     |              |
| 35 | Protocol                        | 25  | Plans for communicating important protocol modifications (eg,       | 5 [94-98]    |
| 36 | amendments                      |     | changes to eligibility criteria, outcomes, analyses) to relevant    |              |
| 37 |                                 |     | parties (eg, investigators, REC/IRBs, trial participants, trial     |              |
| 38 |                                 |     | registries, journals, regulators)                                   |              |
| 39 |                                 |     |                                                                     |              |
| 40 |                                 |     |                                                                     |              |
| 41 | Consent or                      | 26a | Who will obtain informed consent or assent from potential trial     | 5 [101-102]  |
| 42 | assent                          |     | participants or authorised surrogates, and how (see Item 32)        |              |
| 43 |                                 |     |                                                                     |              |
| 44 |                                 | 26b | Additional consent provisions for collection and use of             | NA           |
| 45 |                                 |     | participant data and biological specimens in ancillary studies, if  |              |
| 46 |                                 |     | applicable                                                          |              |
| 47 |                                 |     |                                                                     |              |
| 48 |                                 |     |                                                                     |              |
| 49 | Confidentiality                 | 27  | How personal information about potential and enrolled               | 6 [137-148]  |
| 50 |                                 |     | participants will be collected, shared, and maintained in order to  |              |
| 51 |                                 |     | protect confidentiality before, during, and after the trial         |              |
| 52 |                                 |     |                                                                     |              |
| 53 | Declaration of                  | 28  | Financial and other competing interests for principal               | 18 [360]     |
| 54 | interests                       |     | investigators for the overall trial and each study site             |              |
| 55 |                                 |     |                                                                     |              |
| 56 | Access to data                  | 29  | Statement of who will have access to the final trial dataset, and   | 6 [137-148]  |
| 57 |                                 |     | disclosure of contractual agreements that limit such access for     |              |
| 58 |                                 |     | investigators                                                       |              |
| 59 |                                 |     |                                                                     |              |
| 60 |                                 |     |                                                                     |              |

|    |                   |     |                                                                      |              |
|----|-------------------|-----|----------------------------------------------------------------------|--------------|
| 1  |                   |     |                                                                      |              |
| 2  | Ancillary and     | 30  | Provisions, if any, for ancillary and post-trial care, and for       | 6 [145-148]  |
| 3  | post-trial care   |     | compensation to those who suffer harm from trial participation       |              |
| 4  |                   |     |                                                                      |              |
| 5  | Dissemination     | 31a | Plans for investigators and sponsor to communicate trial results     | 2 [45-47]    |
| 6  | policy            |     | to participants, healthcare professionals, the public, and other     |              |
| 7  |                   |     | relevant groups (eg, via publication, reporting in results           |              |
| 8  |                   |     | databases, or other data sharing arrangements), including any        |              |
| 9  |                   |     | publication restrictions                                             |              |
| 10 |                   |     |                                                                      |              |
| 11 |                   |     |                                                                      |              |
| 12 |                   | 31b | Authorship eligibility guidelines and any intended use of            | 18 [349-352] |
| 13 |                   |     | professional writers                                                 |              |
| 14 |                   |     |                                                                      |              |
| 15 |                   | 31c | Plans, if any, for granting public access to the full protocol,      | NA           |
| 16 |                   |     | participant-level dataset, and statistical code                      |              |
| 17 |                   |     |                                                                      |              |
| 18 |                   |     |                                                                      |              |
| 19 | <b>Appendices</b> |     |                                                                      |              |
| 20 |                   |     |                                                                      |              |
| 21 | Informed consent  | 32  | Model consent form and other related documentation given to          | 18 [349-352] |
| 22 | materials         |     | participants and authorised surrogates                               |              |
| 23 |                   |     |                                                                      |              |
| 24 | Biological        | 33  | Plans for collection, laboratory evaluation, and storage of          | NA           |
| 25 | specimens         |     | biological specimens for genetic or molecular analysis in the        |              |
| 26 |                   |     | current trial and for future use in ancillary studies, if applicable |              |
| 27 |                   |     |                                                                      |              |
| 28 |                   |     |                                                                      |              |
| 29 |                   |     |                                                                      |              |
| 30 |                   |     |                                                                      |              |
| 31 |                   |     |                                                                      |              |
| 32 |                   |     |                                                                      |              |
| 33 |                   |     |                                                                      |              |
| 34 |                   |     |                                                                      |              |
| 35 |                   |     |                                                                      |              |
| 36 |                   |     |                                                                      |              |
| 37 |                   |     |                                                                      |              |
| 38 |                   |     |                                                                      |              |
| 39 |                   |     |                                                                      |              |
| 40 |                   |     |                                                                      |              |
| 41 |                   |     |                                                                      |              |
| 42 |                   |     |                                                                      |              |
| 43 |                   |     |                                                                      |              |
| 44 |                   |     |                                                                      |              |
| 45 |                   |     |                                                                      |              |
| 46 |                   |     |                                                                      |              |
| 47 |                   |     |                                                                      |              |
| 48 |                   |     |                                                                      |              |
| 49 |                   |     |                                                                      |              |
| 50 |                   |     |                                                                      |              |
| 51 |                   |     |                                                                      |              |
| 52 |                   |     |                                                                      |              |
| 53 |                   |     |                                                                      |              |
| 54 |                   |     |                                                                      |              |
| 55 |                   |     |                                                                      |              |
| 56 |                   |     |                                                                      |              |
| 57 |                   |     |                                                                      |              |
| 58 |                   |     |                                                                      |              |
| 59 |                   |     |                                                                      |              |
| 60 |                   |     |                                                                      |              |
